# Supplementary material for: Synthesis of novel pyridinium 1,5-zwitterions and their reactivity with isatin-based α-(trifluoromethyl)imines: a sulfur-controlled domino reaction
Source: Royal Society of Chemistry journal article supplement (doi:10.1039/d1qo00312g), 2021-01-01
Supplement: d1qo00312g1.pdf [file d1qo00312g1.pdf]

# Synthesis of novel pyridinium 1,5-zwitterions and their reactivity with isatin-based $\alpha$ -(trifluoromethyl)imines: a sulfur-controlled domino reaction

Gaoting Zhang, Yingjie Lei, Aimin Yu, Xiangtai Meng\*, Lei Zhang\*

<sup>†</sup>Tianjin Key Laboratory of Organic Solar Cells and Photochemical Conversion, School of Chemistry & Chemical Engineering Tianjin University of Technology, Tianjin 300384, P.R. China

<sup>‡</sup>Tianjin Engineering Technology Center of Chemical Wastewater Source Reduction and Recycling, School of Science Tianjin Chengjian University, Tianjin 300384, P.R. China

## Table of contents

|                                                                                                            |      |
|------------------------------------------------------------------------------------------------------------|------|
| 1. General Experimental Information.....                                                                   | S2   |
| 2. The structure of 1-azadiene <b>1</b> and Isatin-derived $\alpha$ -(trifluoromethyl)imine <b>2</b> ..... | S2   |
| 3. General procedure for the synthesis of <b>4</b> and <b>5</b> .....                                      | S2   |
| 4. Procedure for the 1 mmol Scale Reaction of <b>3a</b> , <b>4a</b> and <b>5a</b> .....                    | S3   |
| 5. <sup>1</sup> H NMR of reaction of <b>2a</b> and DMAP.....                                               | S3   |
| 6. Table S1 Optimization of the reaction conditions.....                                                   | S4   |
| 7. Characterization of all new compounds.....                                                              | S4   |
| 8. NMR spectra of all new compounds.....                                                                   | S26  |
| 9. Computational details and archive entries.....                                                          | S93  |
| 10. X-ray Data Collection and Structure Determinations.....                                                | S124 |
| 11. X-ray Crystal Structures.....                                                                          | S133 |
| 12. Reference.....                                                                                         | S135 |

## 1. General information and materials

All reactions were performed under Ar atmospheres in oven-dried glassware with magnetic stirring. Unless otherwise stated, all reagents were purchased from commercial suppliers (Aldrich, TCI or Alfa Aesar) and used without further purification. All solvents were purified and dried according to standard methods prior to use. TLC monitored all reactions with silica gel-coated plates. Flash column chromatography was performed using 200-300 mesh silica gel.  $^1\text{H}$ - and  $^{13}\text{C}$  NMR spectra were recorded at ambient temperature on Bruker 400 or 600 instruments. All spectra were referenced to  $\text{CDCl}_3$  ( $^1\text{H}$   $\delta$  7.26 ppm and  $^{13}\text{C}$  NMR  $\delta$  77.00 ppm).  $^{19}\text{F}$  NMR spectrum was recorded on Bruker 400 (376 MHz) spectrometers with  $\text{CFCl}_3$  as external standard. HRMS were obtained on Waters Xevo Q-TOF MS with ESI resource. Melting points were measured on a RY-I apparatus and are reported uncorrected. IR was measured on a Perkin-Elmer 983G apparatus. Compound **1a**, **1c**, **1d**, **1f**, **1g** was synthesized according to the reported method<sup>[1], [2]</sup>, and the synthesis method of **1b**, **1e** are similar to **1a**. Compound **2** was synthesized according to the reported method<sup>[3]</sup>.

## 2. The structure of 1-azadiene **1** and Isatin-derived $\alpha$ -(trifluoromethyl)imine **2**

### 1-azadiene **1**

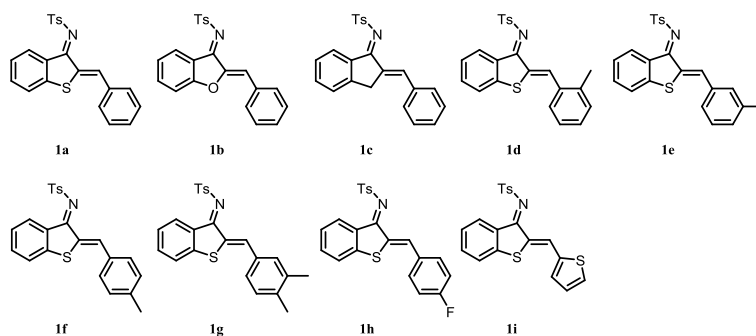

### Isatin-derived $\alpha$ -(trifluoromethyl)imine **2**

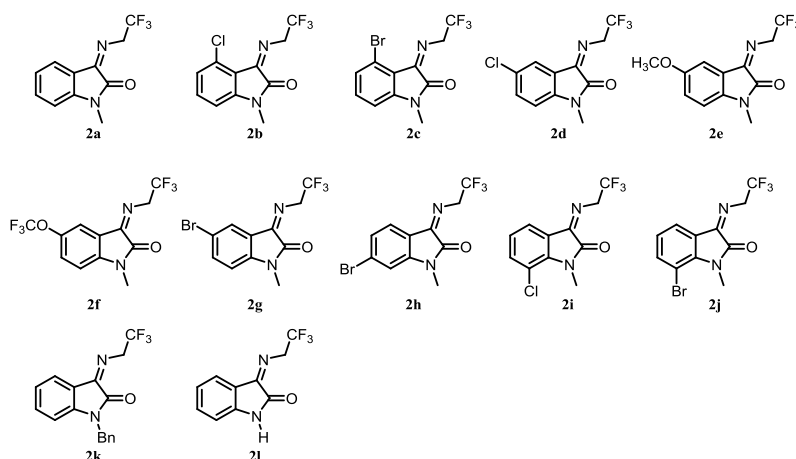

## 3. General procedure for the synthesis of **3a**, **4** and **5**

### **3a**

Under Ar atmosphere, **1a** (79.3 mg, 0.20 mmol) and DMAP (24.6 mg, 0.2 mmol) were dissolved in  $\text{CH}_3\text{CN}$  2 mL. The mixture was stirred at 20 °C for 1min and white solid was obtained. After filtration, **3a** was obtained in 83% yield (86 mg).

### **4a** as an example

Under Ar atmosphere, **1a** (39.15 mg, 0.10 mmol) and DMAP (2.45 mg, 0.02 mmol) were dissolved in  $\text{CH}_3\text{CN}$  1 mL. To the above reaction mixture, **2a** (29.06 mg, 0.12 mmol) was added. Then, the mixture

was stirred at 20 °C until the reaction was completed monitored by TLC analysis about 1 min. After the reaction completed, the reaction mixture was extracted with ethyl acetate (2 × 10 mL). The combined organic layers were dried over anhydrous Mg<sub>2</sub>SO<sub>4</sub> and evaporated under vacuum. The residue was purified by column chromatography (ethyl acetate: petroleum ether = 1:5) to give **4a** (53 mg, 82%) as white solid. **5a** as an example

Under Ar atmosphere, **1a** (39.15 mg, 0.10 mmol) and DMAP (2.45 mg, 0.02 mmol) were dissolved in CH<sub>3</sub>CN 1 mL. To the above reaction mixture, **2a** (29.06 mg, 0.12 mmol) was added. The resulting reaction mixture was allowed to warm to reflux and stirred for 30 min. After the reaction completed (monitored by TLC), the reaction mixture was extracted with ethylacetate (2 × 10 mL). The combined organic layers were dried over anhydrous Mg<sub>2</sub>SO<sub>4</sub> and evaporated under vacuum. The residue was purified by column chromatography (ethyl acetate: petroleum ether = 1:5) to give **5a** (40 mg, 63%) as yellow solid.

#### 4. Procedure for the 1 mmol Scale Reaction of **4a** and **5a**

Under Ar atmosphere, **1a** (391.5 mg, 1.00 mmol) and DMAP (24.5 mg, 0.20 mmol) were dissolved in CH<sub>3</sub>CN 10 mL. To the above reaction mixture, **2a** (290.6 mg, 1.20 mmol) was added. Then, the mixture was stirred at 20 °C until the reaction was completed monitored by TLC analysis about 10 min. After the reaction completed, the reaction mixture was extracted with ethylacetate (20 × 10 mL). The combined organic layers were dried over anhydrous Mg<sub>2</sub>SO<sub>4</sub> and evaporated under vacuum. The residue was purified by column chromatography (ethyl acetate: petroleum ether = 1:5) to give **4a** (422 mg, 66%) as white solid.

Under Ar atmosphere, **1a** (391.5 mg, 1.00 mmol) and DMAP (24.5 mg, 0.20 mmol) were dissolved in CH<sub>3</sub>CN 10 mL. To the above reaction mixture, **2a** (290.6 mg, 1.20 mmol) was added. The resulting reaction mixture was allowed to warm to reflux and stirred for 60 min. After the reaction completed (monitored by TLC), the reaction mixture was extracted with ethylacetate (20 × 10 mL). The combined organic layers were dried over anhydrous Mg<sub>2</sub>SO<sub>4</sub> and evaporated under vacuum. The residue was purified by column chromatography (ethyl acetate: petroleum ether = 1:5) to give **5a** (305 mg, 48%) as yellow solid.

#### 5. <sup>1</sup>H NMR of reaction of **2a** and DMAP

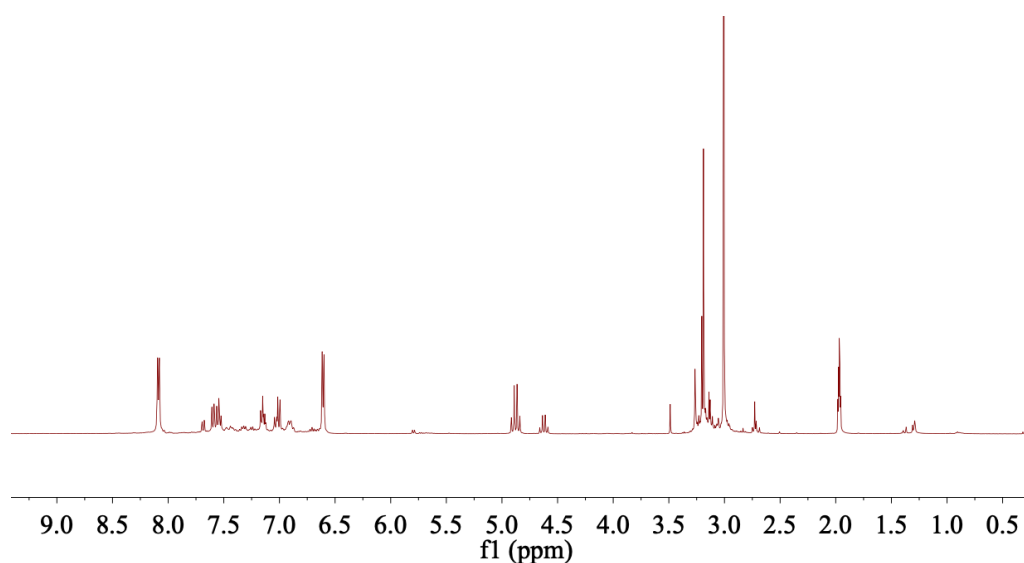

## 6. Table S1 Optimization of the reaction conditions<sup>a</sup>

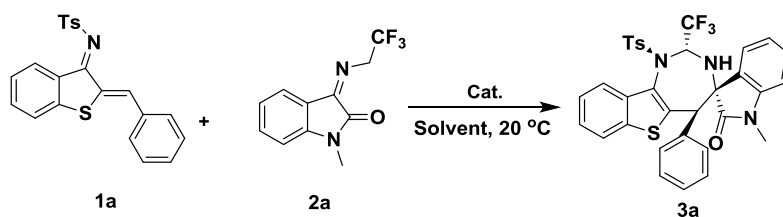

| Entry           | Cat.           | Solvent                         | Time/min | Yield/% (3a) <sup>b</sup> |
|-----------------|----------------|---------------------------------|----------|---------------------------|
| 1               | pyridine       | CH <sub>3</sub> CN              | 10 h     | 50                        |
| 2               | 4-Me-pyridine  | CH <sub>3</sub> CN              | 10 h     | 57                        |
| 3               | 4-MeO-pyridine | CH <sub>3</sub> CN              | 8 h      | 28                        |
| 4               | 3-Br-pyridine  | CH <sub>3</sub> CN              | 10 h     | 0                         |
| 5               | DMAP           | CH <sub>3</sub> CN              | 1        | 82                        |
| 6               | DABCO          | CH <sub>3</sub> CN              | 50       | 50                        |
| 7               | DMAP           | toluene                         | 15       | 51                        |
| 8               | DMAP           | CHCl <sub>3</sub>               | 15       | 30                        |
| 9               | DMAP           | CH <sub>2</sub> Cl <sub>2</sub> | 20       | 33                        |
| 10              | DMAP           | THF                             | 15       | 32                        |
| 11              | DMAP           | DMF                             | 15       | 45                        |
| 12 <sup>c</sup> | DMAP           | CH <sub>3</sub> CN              | 1        | 51                        |
| 13 <sup>d</sup> | DMAP           | CH <sub>3</sub> CN              | 1        | 75                        |

<sup>a</sup> Reaction conditions: **1a** (0.1 mmol), **2a** (0.12 mmol) and catalyst (0.02 mmol) in solvent (1 mL) at 20 °C. <sup>b</sup> Isolated yields. <sup>c</sup> 1a:2a = 1:1. <sup>d</sup> 1a:2a = 1:1.5.

## 7. Characterization of all new compounds

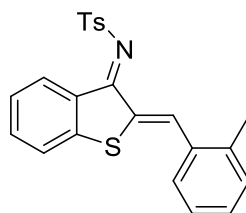

### 4-methyl-N-((E)-2-((Z)-2-methylbenzylidene)benzo[*b*]thiophen-3(2H)-ylidene)benzenesulfonamide (**1d**)

Red solid: 376 mg (yield 19%);  $R_f$  (ethyl acetate : petroleum ether = 1:5) = 0.5; mp 139-141 °C; IR (KBr) 2362, 1590, 1508, 1277, 1140, 1071, 848, 744, 545 cm<sup>-1</sup>; <sup>1</sup>H NMR (400 MHz, CDCl<sub>3</sub>) δ 8.75 (d,  $J$  = 8.0 Hz, 1H), 8.59 (s, 1H), 8.02 (d,  $J$  = 8.2 Hz, 2H), 7.77 – 7.65 (m, 1H), 7.59 – 7.53 (m, 1H), 7.45 (d,  $J$  = 8.0 Hz, 1H), 7.39 – 7.29 (m, 5H), 7.26 – 7.23 (m, 1H), 2.47 (s, 3H), 2.40 (s, 3H) ppm. <sup>13</sup>C{<sup>1</sup>H} NMR (100 MHz, CDCl<sub>3</sub>) δ 170.0, 147.8, 143.0, 140.1, 139.8, 135.7, 135.3, 133.8, 133.0, 131.4, 130.9, 130.5, 129.6, 129.4, 129.0, 126.6, 126.4, 125.7, 123.3, 21.6, 20.1 ppm. HRMS (ESI-TOF)  $m/z$  [M + H]<sup>+</sup> calcd for C<sub>23</sub>H<sub>20</sub>NO<sub>2</sub>S<sup>+</sup> 406.0930, found 406.0948.

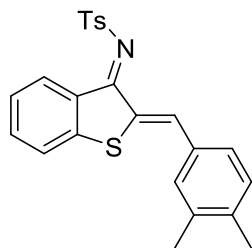

***N*-((*E*)-2-((*Z*)-3,4-dimethylbenzylidene)benzo[*b*]thiophen-3(2*H*)-ylidene)-4-methylbenzenesulfonamide (1g)**

Red solid: 387 mg (yield 20%);  $R_f$  (ethyl acetate : petroleum ether = 1:5) = 0.5; mp 168-170 °C; IR (KBr) 2359, 1588, 1526, 1305, 1144, 1085, 813, 724, 562  $\text{cm}^{-1}$ ;  $^1\text{H}$  NMR (400 MHz,  $\text{CDCl}_3$ )  $\delta$  8.92 (d,  $J$  = 8.0 Hz, 1H), 8.16 (s, 1H), 8.01 (d,  $J$  = 8.4 Hz, 2H), 7.56 (t,  $J$  = 7.6 Hz, 1H), 7.49 (d,  $J$  = 8.0 Hz, 1H), 7.46 – 7.28 (m, 5H), 7.22 (d,  $J$  = 8.4 Hz, 1H), 2.48 (s, 3H), 2.31 (s, 6H) ppm.  $^{13}\text{C}\{^1\text{H}\}$  NMR (100 MHz,  $\text{CDCl}_3$ )  $\delta$  170.4, 147.5, 142.9, 140.3, 140.23, 140.18, 137.5, 136.9, 135.1, 132.7, 132.18, 132.15, 132.0, 131.1, 130.4, 128.9, 126.7, 125.6, 123.3, 21.6, 20.0, 19.8 ppm. HRMS (ESI-TOF)  $m/z$  [ $\text{M} + \text{H}$ ] $^+$  calcd for  $\text{C}_{24}\text{H}_{22}\text{NO}_2\text{S}_2^+$  420.1086, found 420.1085.

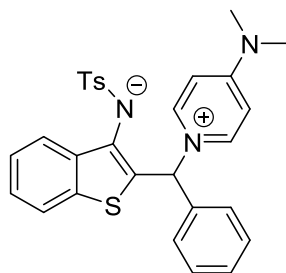

**2-((4-(dimethylamino)pyridin-1-ium-1-yl)(phenyl)methyl)benzo[*b*]thiophen-3-yl(tosyl)amide (3a)**

White solid: 86 mg (yield 83%, 0.2 mmol scale); mp 145-147 °C; IR (KBr) 1647, 1149, 1118, 1079, 750, 778, 741;  $^1\text{H}$  NMR (400 MHz,  $\text{CD}_3\text{CN}$ )  $\delta$  7.91 (d,  $J$  = 7.8 Hz, 2H), 7.53 (d,  $J$  = 8.1 Hz, 3H), 7.41 – 7.32 (m, 4H), 7.27 – 7.15 (m, 3H), 7.10 – 7.00 (m, 4H), 6.74 (d,  $J$  = 7.7 Hz, 2H), 3.15 (s, 6H), 2.28 (s, 3H) ppm.  $^{13}\text{C}\{^1\text{H}\}$  NMR (101 MHz,  $\text{CD}_3\text{CN}$ )  $\delta$  156.4, 149.2, 145.3, 143.4, 140.8, 139.4, 139.0, 138.7, 137.9, 128.9, 128.7, 128.6, 127.2, 125.9, 125.1, 124.9, 123.5, 122.3, 107.3, 67.7, 39.6, 20.3 ppm. HRMS (ESI-TOF)  $m/z$  [ $\text{M} + \text{H}$ ] $^+$  calcd for  $\text{C}_{29}\text{H}_{28}\text{N}_3\text{O}_2\text{S}_2^+$  514.1617, found 514.1617.

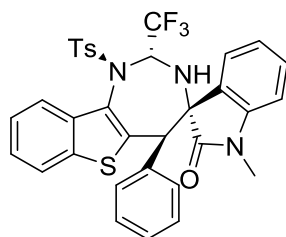

**1'-methyl-5-phenyl-1-tosyl-2-(trifluoromethyl)-1,2,3,5-tetrahydrospiro[benzo[4,5]thieno[3,2-*d*][1,3]diazepine-4,3'-indolin]-2'-one (4a)**

White solid: 53 mg (yield 82%);  $R_f$  (ethyl acetate : petroleum ether = 1:5) = 0.4; mp 228-230 °C; IR (KBr) 3328, 1715, 1613, 1469, 1351, 1152, 965, 705, 592  $\text{cm}^{-1}$ ;  $^1\text{H}$  NMR (400 MHz,  $\text{CDCl}_3$ )  $\delta$  7.99 – 7.83 (m, 1H), 7.77 (d,  $J$  = 8.0 Hz, 1H), 7.58 (d,  $J$  = 8.0 Hz, 2H), 7.39 – 7.26 (m, 2H), 7.24 – 7.07 (m, 8H), 7.01 (d,  $J$  = 7.2 Hz, 2H), 6.65 – 6.49 (m, 1H), 6.21 (dq,  $J$  = 14.0, 4.6 Hz, 1H), 4.98 (s, 1H), 3.02 (d,  $J$  = 14.0 Hz, 1H), 2.86 (s, 3H), 2.39 (s, 3H) ppm.  $^{13}\text{C}\{^1\text{H}\}$  NMR (100 MHz,  $\text{CDCl}_3$ )  $\delta$  174.3, 144.8, 143.3,

143.0, 137.7, 136.5, 136.3, 133.6, 129.7, 129.6, 129.5, 128.3, 128.2, 128.1, 127.9, 125.4 (q,  $^1J_{C-F}$  = 251.1 Hz), 124.9, 124.7, 124.5, 124.0, 123.3, 122.5, 121.8, 108.6, 65.9 (q,  $^2J_{C-F}$  = 32.7 Hz), 63.7, 51.3, 25.9, 21.6 ppm.  $^{19}\text{F}$  NMR (376 MHz,  $\text{CDCl}_3$ )  $\delta$  -78.05 ppm. HRMS (ESI-TOF)  $m/z$   $[\text{M} + \text{H}]^+$  calcd for  $\text{C}_{33}\text{H}_{27}\text{F}_3\text{N}_3\text{O}_3\text{S}_2^+$  634.1440, found 634.1442.

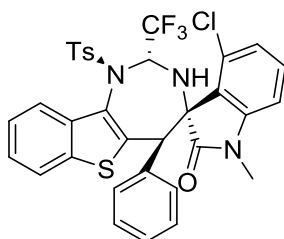

**4'-chloro-1'-methyl-5-phenyl-1-tosyl-2-(trifluoromethyl)-1,2,3,5-tetrahydrospiro[benzo[4,5]thieno[3,2-d][1,3]diazepine-4,3'-indolin]-2'-one (4b)**

White solid: 56 mg (yield 82%);  $R_f$  (ethyl acetate : petroleum ether = 1:5) = 0.4; mp 226-228 °C; IR (KBr) 3448, 1713, 1610, 1457, 1351, 1192, 1162, 753, 665  $\text{cm}^{-1}$ ;  $^1\text{H}$  NMR (400 MHz,  $\text{CDCl}_3$ )  $\delta$  7.74 (d,  $J$  = 8.0 Hz, 1H), 7.39 (dd,  $J$  = 15.8, 8.0 Hz, 3H), 7.31 (t,  $J$  = 7.4 Hz, 1H), 7.21 (t,  $J$  = 7.4 Hz, 1H), 7.15 – 6.96 (m, 9H), 6.86 (dq,  $J$  = 13.6, 4.6 Hz, 1H), 6.38 (d,  $J$  = 7.4 Hz, 1H), 5.45 (s, 1H), 3.00 (d,  $J$  = 14.0 Hz, 1H), 2.97 (s, 3H), 2.30 (s, 3H) ppm.  $^{13}\text{C}\{^1\text{H}\}$  NMR (100 MHz,  $\text{CDCl}_3$ )  $\delta$  173.9, 144.9, 144.4, 144.3, 142.1, 137.4, 136.5, 136.4, 135.8, 133.8, 130.7, 130.3, 129.1, 128.5, 128.3, 127.9, 125.9, 124.7, 124.6, 124.5, 122.34, 122.27, 107.0, 67.6 (q,  $^2J_{C-F}$  = 31.9 Hz), 65.7, 47.0, 26.3, 21.4 ppm. (the C of  $\text{CF}_3$  is not observed).  $^{19}\text{F}$  NMR (376 MHz,  $\text{CDCl}_3$ )  $\delta$  -78.75 ppm. HRMS (ESI-TOF)  $m/z$   $[\text{M} + \text{H}]^+$  calcd for  $\text{C}_{33}\text{H}_{26}\text{ClF}_3\text{N}_3\text{O}_3\text{S}_2^+$  668.1051, found 668.1045.

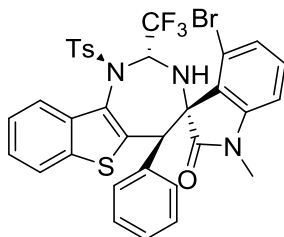

**4'-bromo-1'-methyl-5-phenyl-1-tosyl-2-(trifluoromethyl)-1,2,3,5-tetrahydrospiro[benzo[4,5]thieno[3,2-d][1,3]diazepine-4,3'-indolin]-2'-one (4c)**

White solid: 58 mg (yield 80%);  $R_f$  (ethyl acetate : petroleum ether = 1:5) = 0.4; mp 212-214 °C; IR (KBr) 3322, 1713, 1605, 1454, 1350, 1194, 1161, 780, 665  $\text{cm}^{-1}$ ;  $^1\text{H}$  NMR (400 MHz,  $\text{CDCl}_3$ )  $\delta$  7.76 – 7.67 (m, 1H), 7.40 (d,  $J$  = 8.4 Hz, 2H), 7.31 – 7.26 (m, 2H), 7.22 (dd,  $J$  = 8.0, 0.8 Hz, 1H), 7.18 – 7.06 (m, 9H), 6.99 (t,  $J$  = 8.0 Hz, 1H), 6.42 (d,  $J$  = 7.8 Hz, 1H), 5.71 (s, 1H), 3.02 (d,  $J$  = 14.0 Hz, 1H), 2.99 (s, 3H), 2.31 (s, 3H) ppm.  $^{13}\text{C}\{^1\text{H}\}$  NMR (100 MHz,  $\text{CDCl}_3$ )  $\delta$  174.0, 145.1, 144.4, 142.3, 137.3, 136.4, 135.8, 133.9, 130.8, 129.1, 128.44, 128.40, 128.1, 128.0, 127.8, 124.6, 124.5, 124.4, 122.3, 122.1, 118.7, 107.5, 67.7 (q,  $^2J_{C-F}$  = 32.0 Hz), 66.2, 60.5, 46.7, 26.4, 21.5 ppm (the C of  $\text{CF}_3$  is not observed).  $^{19}\text{F}$  NMR (376 MHz,  $\text{CDCl}_3$ )  $\delta$  -78.80 ppm. HRMS (ESI-TOF)  $m/z$   $[\text{M} + \text{H}]^+$  calcd for  $\text{C}_{33}\text{H}_{26}\text{BrF}_3\text{N}_3\text{O}_3\text{S}_2^+$  712.0546, found 712.0545.

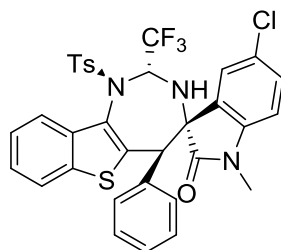

**5'-chloro-1'-methyl-5-phenyl-1-tosyl-2-(trifluoromethyl)-1,2,3,5-tetrahydrospiro[benzo[4,5]thieno[3,2-d][1,3]diazepine-4,3'-indolin]-2'-one (4d)**

White solid: 55 mg (yield 80%);  $R_f$  (ethyl acetate : petroleum ether = 1:5) = 0.4; mp 218-220 °C; IR (KBr) 3315, 1724, 1613, 1493, 1365, 1153, 789, 757, 661  $\text{cm}^{-1}$ ;  $^1\text{H}$  NMR (400 MHz,  $\text{CDCl}_3$ )  $\delta$  7.85 (d,  $J = 2.0$  Hz, 1H), 7.81 – 7.72 (m, 1H), 7.60 (d,  $J = 8.4$  Hz, 2H), 7.38 – 7.32 (m, 2H), 7.28 (dd,  $J = 6.0$ , 1.6 Hz, 2H), 7.25 – 7.21 (m, 2H), 7.20 – 7.08 (m, 3H), 7.00 – 6.87 (m, 2H), 6.46 (d,  $J = 8.4$  Hz, 1H), 6.11 (dq,  $J = 13.8$ , 4.8 Hz, 1H), 4.75 (s, 1H), 3.00 (d,  $J = 14.0$  Hz, 1H), 2.83 (s, 3H), 2.41 (s, 3H) ppm.  $^{13}\text{C}\{^1\text{H}\}$  NMR (100 MHz,  $\text{CDCl}_3$ )  $\delta$  173.9, 144.9, 142.1, 141.8, 137.7, 136.5, 136.2, 133.2, 130.0, 129.7, 129.62, 129.56, 128.5, 128.3, 128.11, 128.06, 125.8 (q,  $^1J_{\text{C-F}} = 281.6$  Hz), 125.1, 124.9, 124.7, 124.5, 122.5, 122.1, 109.5, 65.9 (q,  $^2J_{\text{C-F}} = 32.9$  Hz), 63.8, 51.4, 26.0, 21.6 ppm.  $^{19}\text{F}$  NMR (376 MHz,  $\text{CDCl}_3$ )  $\delta$  -77.92 ppm. HRMS (ESI-TOF)  $m/z$   $[\text{M} + \text{H}]^+$  calcd for  $\text{C}_{33}\text{H}_{26}\text{ClF}_3\text{N}_3\text{O}_3\text{S}_2^+$  668.1051, found 668.1047.

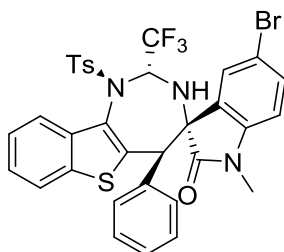

**5'-bromo-1'-methyl-5-phenyl-1-tosyl-2-(trifluoromethyl)-1,2,3,5-tetrahydrospiro[benzo[4,5]thieno[3,2-d][1,3]diazepine-4,3'-indolin]-2'-one (4e)**

White solid: 61 mg (yield 84%);  $R_f$  (ethyl acetate : petroleum ether = 1:5) = 0.4; mp 222-224 °C; IR (KBr) 3316, 1726, 1612, 1491, 1364, 1251, 999, 812, 660  $\text{cm}^{-1}$ ;  $^1\text{H}$  NMR (400 MHz,  $\text{CDCl}_3$ )  $\delta$  7.97 (m, 1H), 7.78 (d,  $J = 8.0$  Hz, 1H), 7.60 (d,  $J = 8.2$  Hz, 2H), 7.44 – 7.39 (m, 2H), 7.38 – 7.33 (m, 1H), 7.33 – 7.26 (m, 1H), 7.26 – 7.23 (m, 2H), 7.20 – 7.14 (m, 1H), 7.10 (t,  $J = 7.4$  Hz, 2H), 6.91 (d,  $J = 7.4$  Hz, 2H), 6.41 (d,  $J = 8.3$  Hz, 1H), 6.09 (dq,  $J = 13.8$ , 4.6 Hz, 1H), 4.66 (s, 1H), 3.00 (d,  $J = 14.0$  Hz, 1H), 2.82 (s, 3H), 2.41 (s, 3H) ppm.  $^{13}\text{C}\{^1\text{H}\}$  NMR (100 MHz,  $\text{CDCl}_3$ )  $\delta$  173.8, 145.0, 142.3, 142.0, 137.7, 136.4, 136.2, 133.2, 132.5, 130.3, 129.7, 129.5, 128.3, 128.07, 127.2, 125.7 (q,  $^1J_{\text{C-F}} = 262.5$  Hz), 125.0, 124.9, 124.8, 122.5, 122.2, 115.7, 110.0, 66.0 (q,  $^2J_{\text{C-F}} = 33.1$  Hz), 63.7, 51.4, 26.0, 21.6 ppm.  $^{19}\text{F}$  NMR (376 MHz,  $\text{CDCl}_3$ )  $\delta$  -77.89 ppm. HRMS (ESI-TOF)  $m/z$   $[\text{M} + \text{H}]^+$  calcd for  $\text{C}_{33}\text{H}_{26}\text{BrF}_3\text{N}_3\text{O}_3\text{S}_2^+$  712.0546, found 712.0541.

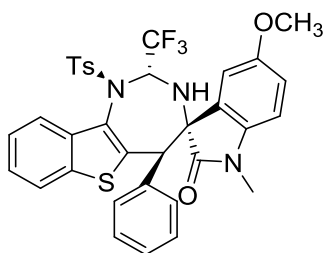

**5'-methoxy-1'-methyl-5-phenyl-1-tosyl-2-(trifluoromethyl)-1,2,3,5-tetrahydrospiro[benzo[4,5]thieno[3,2-d][1,3]diazepine-4,3'-indolin]-2'-one (4f)**

White solid: 45 mg (yield 67%);  $R_f$  (ethyl acetate : petroleum ether = 1:5) = 0.4; mp 232-234 °C; IR (KBr) 3315, 1715, 1600, 1498, 1342, 1153, 967, 668, 575  $\text{cm}^{-1}$ ;  $^1\text{H}$  NMR (400 MHz,  $\text{CDCl}_3$ )  $\delta$  7.76 (d,  $J = 8.0$  Hz, 1H), 7.60 (m, 3H), 7.37 – 7.27 (m, 1H), 7.24 – 7.04 (m, 9H), 6.80 (dd,  $J = 8.4$ , 2.4 Hz, 1H), 6.46 (d,  $J = 8.5$  Hz, 1H), 6.22 (dq,  $J = 14.0$ , 4.8 Hz, 1H), 5.04 (s, 1H), 3.96 (s, 3H), 3.03 (d,  $J = 13.6$  Hz, 1H), 2.84 (s, 3H), 2.40 (s, 3H) ppm.  $^{13}\text{C}\{^1\text{H}\}$  NMR (100 MHz,  $\text{CDCl}_3$ )  $\delta$  174.0, 156.4, 144.8, 143.2,

137.7, 136.6, 136.1, 133.7, 129.7, 129.6, 129.4, 128.2, 128.1, 128.0, 124.9, 124.6, 124.5, 122.6, 121.8, 114.2, 111.2, 109.1, 100.0, 65.8 (q,  $^2J_{C-F} = 32.4$  Hz), 64.0, 56.1, 51.3, 26.0, 21.6 ppm (the C of CF<sub>3</sub> is not observed). <sup>19</sup>F NMR (376 MHz, CDCl<sub>3</sub>) δ -77.90 ppm. HRMS (ESI-TOF) *m/z* [M + H]<sup>+</sup> calcd for C<sub>34</sub>H<sub>29</sub>F<sub>3</sub>N<sub>3</sub>O<sub>4</sub>S<sub>2</sub><sup>+</sup> 664.1546, found 664.1545.

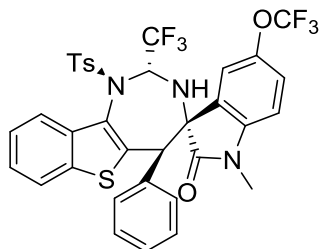

**1'-methyl-5-phenyl-1-tosyl-5'-(trifluoromethoxy)-2-(trifluoromethyl)-1,2,3,5-tetrahydrospiro[benzo[4,5]thieno[3,2-d][1,3]diazepine-4,3'-indolin]-2'-one (4g)**

White solid: 47 mg (yield 64%); *R<sub>f</sub>* (ethyl acetate : petroleum ether = 1:5) = 0.4; mp 222-224 °C; IR (KBr) 3445, 1728, 1622, 1379, 1260, 1159, 746, 666, 578 cm<sup>-1</sup>; <sup>1</sup>H NMR (400 MHz, CDCl<sub>3</sub>) δ 7.78 (d, *J* = 8.2 Hz, 2H), 7.56 (d, *J* = 8.2 Hz, 2H), 7.43 – 7.32 (m, 2H), 7.29 (d, *J* = 8.0 Hz, 1H), 7.23 – 7.12 (m, 4H), 7.09 (t, *J* = 7.5 Hz, 2H), 6.93 (d, *J* = 7.4 Hz, 2H), 6.53 (d, *J* = 8.4 Hz, 1H), 6.08 (dq, *J* = 13.8, 4.6 Hz, 1H), 4.75 (s, 1H), 3.01 (d, *J* = 14.0 Hz, 1H), 2.86 (s, 3H), 2.38 (s, 3H) ppm. <sup>13</sup>C{<sup>1</sup>H} NMR (100 MHz, CDCl<sub>3</sub>) δ 174.1, 144.93, 144.90, 144.85, 142.0, 141.9, 137.7, 136.2, 136.1, 133.0, 129.7, 129.6, 129.4, 128.4, 128.04, 128.01, 125.1, 124.9, 124.8, 122.9, 122.6, 122.1, 118.2, 109.1, 66.4 (q,  $^2J_{C-F} = 32.5$  Hz), 63.8, 51.3, 26.1, 21.6 ppm (the C of CF<sub>3</sub> is not observed). <sup>19</sup>F NMR (376 MHz, CDCl<sub>3</sub>) δ -58.22, -78.03 ppm. HRMS (ESI-TOF) *m/z* [M + H]<sup>+</sup> calcd for C<sub>34</sub>H<sub>26</sub>F<sub>6</sub>N<sub>3</sub>O<sub>4</sub>S<sub>2</sub><sup>+</sup> 718.1263, found 718.1258.

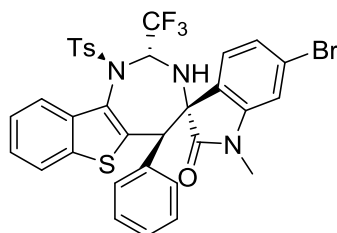

**6'-bromo-1'-methyl-5-phenyl-1-tosyl-2-(trifluoromethyl)-1,2,3,5-tetrahydrospiro[benzo[4,5]thieno[3,2-d][1,3]diazepine-4,3'-indolin]-2'-one (4h)**

White solid: 60 mg (yield 82%); *R<sub>f</sub>* (ethyl acetate : petroleum ether = 1:5) = 0.4; mp 220-222 °C; IR (KBr) 3302, 1723, 1606, 1491, 1371, 1153, 968, 751, 597 cm<sup>-1</sup>; <sup>1</sup>H NMR (400 MHz, CDCl<sub>3</sub>) δ 7.77 (t, *J* = 7.6 Hz, 2H), 7.58 (d, *J* = 8.4 Hz, 2H), 7.39 (dd, *J* = 7.8, 1.6 Hz, 1H), 7.35 – 7.29 (m, 1H), 7.23 – 7.10 (m, 7H), 7.09 – 7.00 (m, 2H), 6.72 (d, *J* = 1.6 Hz, 1H), 6.14 (dq, *J* = 13.8, 4.6 Hz, 1H), 5.02 (s, 1H), 2.98 (d, *J* = 14.0 Hz, 1H), 2.85 (s, 3H), 2.40 (s, 3H) ppm. <sup>13</sup>C{<sup>1</sup>H} NMR (100 MHz, CDCl<sub>3</sub>) δ 174.2, 144.9, 144.6, 142.7, 137.7, 136.4, 136.1, 133.3, 129.60, 129.59, 128.4, 128.2, 127.3, 126.1, 125.2, 124.9, 124.7, 124.6, 123.5, 122.6, 121.7, 112.2, 65.0 (q,  $^2J_{C-F} = 32.7$  Hz), 63.5, 51.1, 26.0, 21.6 ppm (the C of CF<sub>3</sub> is not observed). <sup>19</sup>F NMR (376 MHz, CDCl<sub>3</sub>) δ -78.04 ppm. HRMS (ESI-TOF) *m/z* [M + H]<sup>+</sup> calcd for C<sub>33</sub>H<sub>26</sub>BrF<sub>3</sub>N<sub>3</sub>O<sub>3</sub>S<sub>2</sub><sup>+</sup> 712.0546, found 712.0551.



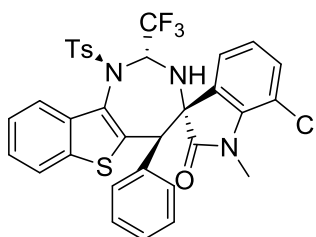

**7'-chloro-1'-methyl-5-phenyl-1-tosyl-2-(trifluoromethyl)-1,2,3,5-tetrahydrospiro[benzo[4,5]thieno[3,2-*d*][1,3]diazepine-4,3'-indolin]-2'-one (4i)**

White solid: 57 mg (yield 83%);  $R_f$  (ethyl acetate : petroleum ether = 1:5) = 0.4; mp 222-224 °C; IR (KBr) 2923, 1719, 1637, 1560, 1458, 1364, 1163, 670, 628, 591  $\text{cm}^{-1}$ ;  $^1\text{H}$  NMR (400 MHz,  $\text{CDCl}_3$ )  $\delta$  7.88 – 7.80 (m, 1H), 7.76 (d,  $J$  = 8.0 Hz, 1H), 7.58 (d,  $J$  = 8.2 Hz, 2H), 7.36 – 7.27 (m, 1H), 7.23 – 7.09 (m, 9H), 7.04 (d,  $J$  = 7.4 Hz, 2H), 6.18 (dq,  $J$  = 14.0, 4.8 Hz, 1H), 5.06 (s, 1H), 3.25 (s, 3H), 2.99 (d,  $J$  = 14.0 Hz, 1H), 2.40 (s, 3H) ppm.  $^{13}\text{C}\{^1\text{H}\}$  NMR (100 MHz,  $\text{CDCl}_3$ )  $\delta$  174.7, 145.3, 144.9, 142.8, 139.3, 137.7, 136.4, 136.0, 133.3, 132.1, 131.05, 129.6, 128.5, 128.22, 128.17, 124.9, 124.7, 124.5, 124.1, 122.57, 122.55, 121.7, 116.1, 65.5 (q,  $^2J_{\text{C-F}}$  = 32.9 Hz), 63.2, 51.3, 29.4, 21.6 ppm (the C of  $\text{CF}_3$  is not observed).  $^{19}\text{F}$  NMR (376 MHz,  $\text{CDCl}_3$ )  $\delta$  -78.05 ppm. HRMS (ESI-TOF)  $m/z$   $[\text{M} + \text{H}]^+$  calcd for  $\text{C}_{33}\text{H}_{26}\text{ClF}_3\text{N}_3\text{O}_3\text{S}_2^+$  668.1051, found 668.1057.

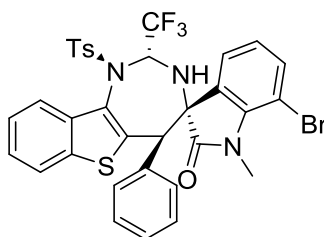

**7'-bromo-1'-methyl-5-phenyl-1-tosyl-2-(trifluoromethyl)-1,2,3,5-tetrahydrospiro[benzo[4,5]thieno[3,2-*d*][1,3]diazepine-4,3'-indolin]-2'-one (4j)**

White solid: 62 mg (yield 82%);  $R_f$  (ethyl acetate : petroleum ether = 1:5) = 0.4; mp 224-226 °C; IR (KBr) 3324, 1718, 1607, 1459, 1348, 1201, 1162, 778, 672, 595  $\text{cm}^{-1}$ ;  $^1\text{H}$  NMR (400 MHz,  $\text{CDCl}_3$ )  $\delta$  7.87 (d,  $J$  = 7.2 Hz, 1H), 7.76 (d,  $J$  = 8.0 Hz, 1H), 7.58 (d,  $J$  = 8.2 Hz, 2H), 7.40 (d,  $J$  = 8.0 Hz, 1H), 7.31 (t,  $J$  = 7.6 Hz, 1H), 7.24 – 7.08 (m, 8H), 7.03 (d,  $J$  = 7.4 Hz, 2H), 6.18 (dq,  $J$  = 14.0, 4.8 Hz, 1H), 5.06 (s, 1H), 3.26 (s, 3H), 2.99 (d,  $J$  = 14.0 Hz, 1H), 2.40 (s, 3H) ppm.  $^{13}\text{C}\{^1\text{H}\}$  NMR (100 MHz,  $\text{CDCl}_3$ )  $\delta$  174.9, 144.9, 142.8, 140.8, 137.7, 136.4, 136.0, 135.4, 133.2, 131.4, 129.6, 128.5, 128.22, 128.17, 124.9, 124.7, 124.6, 124.4, 123.1, 122.6, 121.7, 102.9, 65.5 (q,  $^2J_{\text{C-F}}$  = 32.9 Hz), 63.2, 51.3, 29.7, 21.6 ppm (the C of  $\text{CF}_3$  is not observed).  $^{19}\text{F}$  NMR (376 MHz,  $\text{CDCl}_3$ )  $\delta$  -78.05 ppm. HRMS (ESI-TOF)  $m/z$   $[\text{M} + \text{H}]^+$  calcd for  $\text{C}_{33}\text{H}_{26}\text{BrF}_3\text{N}_3\text{O}_3\text{S}_2^+$  712.0546, found 712.0541.

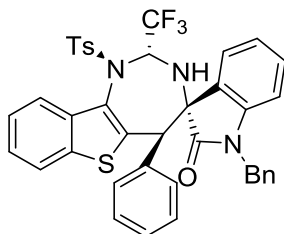

**1'-benzyl-5-phenyl-1-tosyl-2-(trifluoromethyl)-1,2,3,5-tetrahydrospiro[benzo[4,5]thieno[3,2-*d*][1,3]diazepine-4,3'-indolin]-2'-one (4k)**

White solid: 63 mg (yield 78%);  $R_f$  (ethyl acetate : petroleum ether = 1:5) = 0.4; mp 230-232 °C; IR (KBr) 3448, 1719, 1613, 1490, 1465, 1352, 1191, 1151, 672, 546  $\text{cm}^{-1}$ ;  $^1\text{H}$  NMR (400 MHz,  $\text{CDCl}_3$ )

$\delta$  7.98 (d,  $J$  = 7.0 Hz, 1H), 7.77 (d,  $J$  = 8.2 Hz, 1H), 7.60 (d,  $J$  = 8.4 Hz, 2H), 7.34 – 7.28 (m, 2H), 7.25 – 7.07 (m, 13H), 6.66 (d,  $J$  = 7.0 Hz, 2H), 6.41 (d,  $J$  = 7.6 Hz, 1H), 6.21 (dq,  $J$  = 14.0, 4.8 Hz, 1H), 5.17 (s, 1H), 4.83 (d,  $J$  = 16.0 Hz, 1H), 4.50 (d,  $J$  = 16.2 Hz, 1H), 3.06 (d,  $J$  = 13.6 Hz, 1H), 2.40 (s, 3H) ppm.  $^{13}\text{C}\{^1\text{H}\}$  NMR (100 MHz,  $\text{CDCl}_3$ )  $\delta$  174.5, 144.8, 143.3, 142.8, 137.6, 136.5, 136.1, 134.5, 133.9, 130.1, 129.7, 129.6, 128.6, 128.4, 128.2, 128.10, 182.09, 127.4, 126.7, 124.9, 124.7, 124.5, 124.2, 123.3, 122.5, 121.8, 110.1, 65.7 (q,  $^2J_{\text{C-F}}$  = 32.9 Hz), 63.8, 50.5, 43.8, 21.6 ppm (the C of  $\text{CF}_3$  is not observed).  $^{19}\text{F}$  NMR (376 MHz,  $\text{CDCl}_3$ )  $\delta$  -77.88 ppm. HRMS (ESI-TOF)  $m/z$   $[\text{M} + \text{H}]^+$  calcd for  $\text{C}_{39}\text{H}_{31}\text{F}_3\text{N}_3\text{O}_3\text{S}_2^+$  710.1753, found 710.1757.

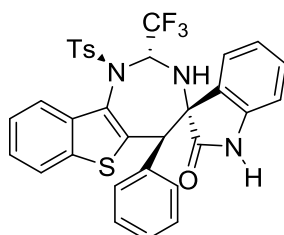

**5-phenyl-1-tosyl-2-(trifluoromethyl)-1,2,3,5-tetrahydrospiro[benzo[4,5]thieno[3,2-d][1,3]diazepine-4,3'-indolin]-2'-one (4k)**

White solid: 51 mg (yield 72%);  $R_f$  (ethyl acetate : petroleum ether = 1:5) = 0.4; mp 228-230 °C; IR (KBr) 3448, 1713, 1622, 1382, 1192, 1156, 704, 666, 570  $\text{cm}^{-1}$ ;  $^1\text{H}$  NMR (400 MHz,  $\text{CDCl}_3$ )  $\delta$  7.94 – 7.86 (m, 1H), 7.76 (d,  $J$  = 8.0 Hz, 1H), 7.58 (d,  $J$  = 8.0 Hz, 2H), 7.41 (s, 1H), 7.34 – 7.28 (m, 1H), 7.26 – 7.15 (m, 7H), 7.13 – 7.08 (m, 4H), 6.67 – 6.57 (m, 1H), 6.19 (dq,  $J$  = 14.2, 4.8 Hz, 1H), 5.04 (s, 1H), 2.97 (d,  $J$  = 14.0 Hz, 1H), 2.39 (s, 3H) ppm.  $^{13}\text{C}\{^1\text{H}\}$  NMR (100 MHz,  $\text{CDCl}_3$ )  $\delta$  175.9, 144.8, 143.0, 140.2, 137.6, 136.4, 136.1, 133.6, 129.8, 129.7, 129.6, 128.5, 128.24, 128.22, 128.20, 124.9, 124.7, 124.6, 124.4, 123.4, 122.5, 121.8, 110.4, 65.6 (q,  $^2J_{\text{C-F}}$  = 32.9 Hz), 63.8, 50.8, 21.6 ppm (the C of  $\text{CF}_3$  is not observed).  $^{19}\text{F}$  NMR (376 MHz,  $\text{CDCl}_3$ )  $\delta$  -78.04 ppm. HRMS (ESI-TOF)  $m/z$   $[\text{M} + \text{H}]^+$  calcd for  $\text{C}_{32}\text{H}_{25}\text{F}_3\text{N}_3\text{O}_3\text{S}_2^+$  620.1280, found 620.1289.

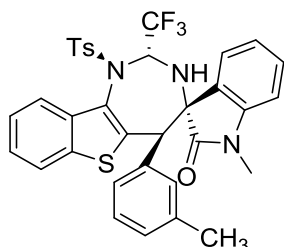

**1'-methyl-5-(m-tolyl)-1-tosyl-2-(trifluoromethyl)-1,2,3,5-tetrahydrospiro[benzo[4,5]thieno[3,2-d][1,3]diazepine-4,3'-indolin]-2'-one (4n)**

White solid: 47 mg (yield 73%);  $R_f$  (ethyl acetate : petroleum ether = 1:5) = 0.4; mp 220-222 °C; IR (KBr) 3314, 1716, 1612, 1374, 1096, 751, 670, 572  $\text{cm}^{-1}$ ;  $^1\text{H}$  NMR (400 MHz,  $\text{CDCl}_3$ )  $\delta$  7.93 – 7.84 (m, 1H), 7.77 (d,  $J$  = 8.0 Hz, 1H), 7.59 (d,  $J$  = 8.2 Hz, 2H), 7.34 – 7.27 (m, 2H), 7.26 – 7.18 (m, 5H), 6.97 (dt,  $J$  = 14.0, 7.6 Hz, 2H), 6.88 (d,  $J$  = 7.4 Hz, 1H), 6.75 (s, 1H), 6.60 – 6.50 (m, 1H), 6.27 – 6.16 (m, 1H), 4.96 (s, 1H), 3.01 (d,  $J$  = 14.0 Hz, 1H), 2.87 (s, 3H), 2.39 (s, 3H), 2.17 (s, 3H) ppm.  $^{13}\text{C}\{^1\text{H}\}$  NMR (100 MHz,  $\text{CDCl}_3$ )  $\delta$  174.3, 144.7, 143.3, 143.2, 137.7, 137.6, 136.5, 136.2, 133.5, 130.4, 129.6, 129.5, 128.8, 128.4, 128.2, 127.7, 126.5, 124.8, 124.6, 124.5, 124.0, 123.2, 122.5, 121.8, 108.5, 65.9 (q,  $^2J_{\text{C-F}}$  = 32.7 Hz), 63.6, 51.2, 25.9, 21.6, 21.3 ppm (the C of  $\text{CF}_3$  is not observed).  $^{19}\text{F}$  NMR (376 MHz,  $\text{CDCl}_3$ )  $\delta$  -78.05 ppm. HRMS (ESI-TOF)  $m/z$   $[\text{M} + \text{H}]^+$  calcd for  $\text{C}_{34}\text{H}_{29}\text{F}_3\text{N}_3\text{O}_3\text{S}_2^+$  648.1597, found 648.1599.

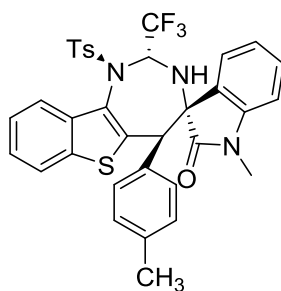

**1'-methyl-5-(p-tolyl)-1-tosyl-2-(trifluoromethyl)-1,2,3,5-tetrahydrospiro[benzo[4,5]thieno[3,2-*d*][1,3]diazepine-4,3'-indolin]-2'-one (4o)**

White solid: 42 mg (yield 65%);  $R_f$  (ethyl acetate : petroleum ether = 1:5) = 0.4; mp 223-225 °C; IR (KBr) 3310, 1717, 1612, 1491, 1339, 1256, 752, 670, 594  $\text{cm}^{-1}$ ;  $^1\text{H}$  NMR (400 MHz,  $\text{CDCl}_3$ )  $\delta$  7.92 – 7.85 (m, 1H), 7.76 (d,  $J$  = 8.0 Hz, 1H), 7.58 (d,  $J$  = 8.4 Hz, 2H), 7.35 – 7.26 (m, 3H), 7.26 – 7.18 (m, 4H), 6.95 – 6.79 (s, 4H), 6.59 – 6.52 (m, 1H), 6.19 (m, 1H), 4.91 (s, 1H), 3.00 (d,  $J$  = 14.0 Hz, 1H), 2.88 (s, 3H), 2.39 (s, 3H), 2.22 (s, 3H) ppm.  $^{13}\text{C}\{^1\text{H}\}$  NMR (100 MHz,  $\text{CDCl}_3$ )  $\delta$  174.4, 144.7, 143.4, 143.3, 137.8, 137.7, 136.5, 136.2, 130.5, 129.6, 129.5, 129.4, 128.7, 128.5, 128.2, 124.7, 124.6, 124.5, 123.9, 123.2, 122.5, 121.9, 108.6, 66.0 (q,  $^2J_{\text{C-F}}$  = 32.5 Hz), 63.5, 50.8, 25.9, 21.6, 21.1 ppm (the C of  $\text{CF}_3$  is not observed).  $^{19}\text{F}$  NMR (376 MHz,  $\text{CDCl}_3$ )  $\delta$  -78.05 ppm. HRMS (ESI-TOF)  $m/z$   $[\text{M} + \text{H}]^+$  calcd for  $\text{C}_{34}\text{H}_{29}\text{F}_3\text{N}_3\text{O}_3\text{S}_2^+$  648.1597, found 648.1596.

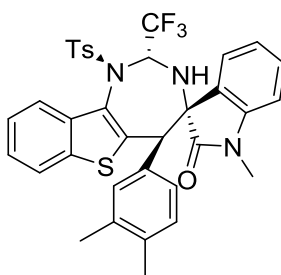

**5-(3,4-dimethylphenyl)-1'-methyl-1-tosyl-2-(trifluoromethyl)-1,2,3,5-tetrahydrospiro[benzo[4,5]thieno[3,2-*d*][1,3]diazepine-4,3'-indolin]-2'-one (4p)**

White solid: 43 mg (yield 68%);  $R_f$  (ethyl acetate : petroleum ether = 1:5) = 0.4; mp 221-223 °C; IR (KBr) 3448, 1716, 1614, 1492, 1359, 1152, 1102, 760, 599  $\text{cm}^{-1}$ ;  $^1\text{H}$  NMR (400 MHz,  $\text{CDCl}_3$ )  $\delta$  7.88 – 7.84 (m, 1H), 7.76 (d,  $J$  = 8.4 Hz, 1H), 7.58 (d,  $J$  = 8.0 Hz, 2H), 7.35 – 7.27 (m, 2H), 7.26 – 7.17 (m, 5H), 6.85 (d,  $J$  = 7.8 Hz, 1H), 6.81 – 6.76 (m, 1H), 6.66 (s, 1H), 6.60 – 6.53 (m, 1H), 6.19 (dq,  $J$  = 14.0, 4.8 Hz, 1H), 4.87 (s, 1H), 2.99 (d,  $J$  = 14.0 Hz, 1H), 2.88 (s, 3H), 2.38 (s, 3H), 2.12 (s, 3H), 2.06 (s, 3H) ppm.  $^{13}\text{C}\{^1\text{H}\}$  NMR (100 MHz,  $\text{CDCl}_3$ )  $\delta$  174.4, 144.7, 143.6, 143.3, 137.7, 136.5, 136.4, 136.2, 130.9, 130.8, 129.5, 129.2, 128.5, 128.2, 126.7, 124.6, 124.5, 123.9, 123.2, 122.5, 121.9, 108.6, 66.0 (q,  $^2J_{\text{C-F}}$  = 32.3 Hz), 63.5, 50.7, 25.9, 21.6, 19.6, 19.4 ppm (the C of  $\text{CF}_3$  is not observed).  $^{19}\text{F}$  NMR (376 MHz,  $\text{CDCl}_3$ )  $\delta$  -78.07 ppm. HRMS (ESI-TOF)  $m/z$   $[\text{M} + \text{H}]^+$  calcd for  $\text{C}_{35}\text{H}_{31}\text{F}_3\text{N}_3\text{O}_3\text{S}_2^+$  662.1753, found 662.1754.

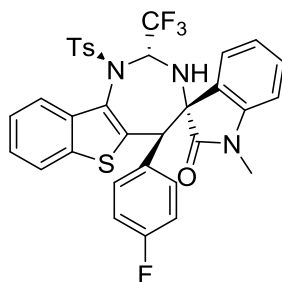

**phenyl)-1'-methyl-1-tosyl-2-(trifluoromethyl)-1,2,3,5-tetrahydrospiro[benzo[4,5]thieno[3,2-d][1,3]diazepine-4,3'-indolin]-2'-one (4q)**

White solid: 43 mg (yield 67%);  $R_f$  (ethyl acetate : petroleum ether = 1:5) = 0.4; mp 225-227 °C; IR (KBr) 3311, 1716, 1610, 1511, 1491, 1373, 1149, 969, 753, 547  $\text{cm}^{-1}$ ;  $^1\text{H}$  NMR (400 MHz,  $\text{CDCl}_3$ )  $\delta$  7.92 (d,  $J = 7.2$  Hz, 1H), 7.77 (d,  $J = 8.4$  Hz, 1H), 7.59 (d,  $J = 8.4$  Hz, 2H), 7.38 – 7.28 (m, 3H), 7.25 – 7.11 (m, 4H), 7.08 – 6.98 (m, 2H), 6.79 (t,  $J = 8.8$  Hz, 2H), 6.65 – 6.52 (m, 1H), 6.22 (dq,  $J = 14.0, 4.6$  Hz, 1H), 5.08 (s, 1H), 3.00 (d,  $J = 14.0$  Hz, 1H), 2.89 (s, 3H), 2.40 (s, 3H) ppm.  $^{13}\text{C}\{^1\text{H}\}$  NMR (100 MHz,  $\text{CDCl}_3$ )  $\delta$  174.2, 162.4 (d,  $J = 247.8$  Hz), 144.8, 143.2, 142.8, 137.6, 136.4, 136.1, 131.4, 131.4, 129.8, 129.6, 128.2, 128.1, 125.0, 124.8, 124.6, 124.0, 123.5, 122.6, 121.8, 114.9 (d,  $J = 21.3$  Hz), 108.7, 65.8 (q,  $^2J_{\text{C-F}} = 32.8$  Hz), 63.7, 50.4, 26.0, 21.6 ppm (the C of  $\text{CF}_3$  is not observed).  $^{19}\text{F}$  NMR (376 MHz,  $\text{CDCl}_3$ )  $\delta$  -78.05, -113.40 ppm. HRMS (ESI-TOF)  $m/z$   $[\text{M} + \text{H}]^+$  calcd for  $\text{C}_{33}\text{H}_{26}\text{F}_4\text{N}_3\text{O}_3\text{S}_2^+$  652.1346, found 652.1340.

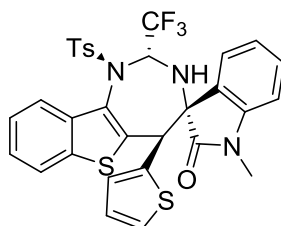

**1'-methyl-5-(thiophen-2-yl)-1-tosyl-2-(trifluoromethyl)-1,2,3,5-tetrahydrospiro[benzo[4,5]thieno[3,2-d][1,3]diazepine-4,3'-indolin]-2'-one (4r)**

White solid: 36 mg (yield 57%);  $R_f$  (ethyl acetate : petroleum ether = 1:5) = 0.4; mp 226-228 °C; IR (KBr) 3448, 1718, 1615, 1491, 1352, 1196, 1162, 751, 670  $\text{cm}^{-1}$ ;  $^1\text{H}$  NMR (400 MHz,  $\text{CDCl}_3$ )  $\delta$  7.89 – 7.82 (m, 1H), 7.77 (d,  $J = 8.0$  Hz, 1H), 7.59 (d,  $J = 8.4$  Hz, 2H), 7.40 – 7.26 (m, 4H), 7.26 – 7.18 (m, 3H), 7.05 – 6.99 (m, 1H), 6.98 – 6.91 (m, 1H), 6.82 (dd,  $J = 4.8, 3.6$  Hz, 1H), 6.66 (d,  $J = 7.4$  Hz, 1H), 6.15 (dq,  $J = 13.8, 4.8$  Hz, 1H), 5.24 (s, 1H), 2.99 (d,  $J = 14.0$  Hz, 1H), 2.95 (s, 3H), 2.40 (s, 3H) ppm.  $^{13}\text{C}\{^1\text{H}\}$  NMR (100 MHz,  $\text{CDCl}_3$ )  $\delta$  174.3, 144.9, 143.6, 143.2, 137.7, 136.3, 136.2, 135.2, 129.9, 129.7, 128.3, 128.1, 127.9, 126.7, 125.1, 124.8, 124.6, 124.5, 123.9, 123.4, 122.6, 121.9, 108.7, 65.8 (q,  $^2J_{\text{C-F}} = 36.4$  Hz), 63.7, 45.7, 26.1, 21.7 ppm (the C of  $\text{CF}_3$  is not observed).  $^{19}\text{F}$  NMR (376 MHz,  $\text{CDCl}_3$ )  $\delta$  -78.06 ppm. HRMS (ESI-TOF)  $m/z$   $[\text{M} + \text{Na}]^+$  calcd for  $\text{C}_{31}\text{H}_{24}\text{F}_3\text{N}_3\text{O}_3\text{S}_3\text{Na}^+$  662.0824, found 662.0819.

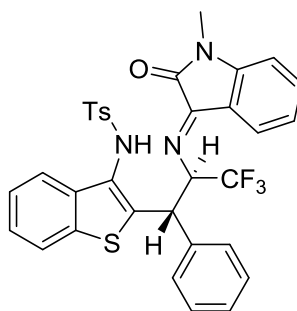

**4-methyl-N-(2-(3,3,3-trifluoro-2-((1-methyl-2-oxoindolin-3-ylidene)amino)-1-phenylpropyl)benzo[*b*]thiophen-3-yl)benzenesulfonamide (5a)**

Yellow solid: 40 mg (yield 63%);  $R_f$  (ethyl acetate : petroleum ether = 1:5) = 0.29; mp 183-185 °C; IR (KBr) 3448, 1718, 1615, 1491, 1352, 1196, 1162, 751, 670  $\text{cm}^{-1}$ ;  $^1\text{H}$  NMR (400 MHz,  $\text{CDCl}_3$ )  $\delta$  8.34 (s, 1H), 7.97 (d,  $J = 8.0$  Hz, 1H), 7.83 – 7.70 (m, 3H), 7.50 (d,  $J = 7.8$  Hz, 1H), 7.45 – 7.35 (m, 3H), 7.32 – 7.27 (m, 3H), 7.24 – 7.12 (m, 3H), 7.01 – 6.89 (m, 1H), 6.83 – 6.74 (m, 2H), 6.64 (d,  $J = 7.8$  Hz, 1H), 4.36 (d,  $J = 9.0$  Hz, 1H), 3.02 (s, 3H), 2.55 (s, 3H) ppm.  $^{13}\text{C}\{^1\text{H}\}$  NMR (100 MHz,  $\text{CDCl}_3$ )  $\delta$  158.8, 158.7, 146.1, 144.1, 138.0, 137.53, 137.47, 137.1, 136.5, 134.9, 130.0, 128.7, 128.3, 128.1, 127.7, 126.3, 124.7, 124.4, 124.0, 123.8, 123.7, 121.7, 119.7, 108.9, 67.6 (q,  $^2J_{\text{C-F}} = 26.6$  Hz), 45.1, 25.7, 21.6 ppm (the C of  $\text{CF}_3$  is not observed).  $^{19}\text{F}$  NMR (376 MHz,  $\text{CDCl}_3$ )  $\delta$  -70.45 ppm. HRMS (ESI-TOF)  $m/z$   $[\text{M} + \text{H}]^+$  calcd for  $\text{C}_{33}\text{H}_{27}\text{F}_3\text{N}_3\text{O}_3\text{S}_2^+$  634.1440, found 634.1431.

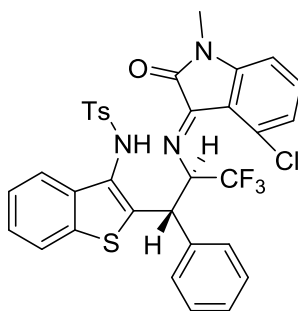

**(*E*)-N-(2-(2-((4-chloro-1-methyl-2-oxoindolin-3-ylidene)amino)-3,3,3-trifluoro-1-phenylpropyl)benzo[*b*]thiophen-3-yl)-4-methylbenzenesulfonamide (5b)**

Yellow solid: 40 mg (yield 59%);  $R_f$  (ethyl acetate : petroleum ether = 1:5) = 0.29; mp 203-205 °C; IR (KBr) 3443, 1718, 1609, 1456, 1346, 1172, 1154, 730, 670  $\text{cm}^{-1}$ ;  $^1\text{H}$  NMR (400 MHz,  $\text{CDCl}_3$ )  $\delta$  7.89 – 7.81 (m, 1H), 7.78 (d,  $J = 8.2$  Hz, 2H), 7.70 (s, 1H), 7.53 – 7.46 (m, 1H), 7.38 (d,  $J = 8.0$  Hz, 2H), 7.33 – 7.27 (m, 4H), 7.24 – 7.16 (m, 2H), 7.14 – 7.04 (m, 2H), 6.91 – 6.74 (m, 2H), 6.52 (d,  $J = 7.8$  Hz, 1H), 4.53 (d,  $J = 10.4$  Hz, 1H), 2.98 (s, 3H), 2.54 (s, 3H) ppm.  $^{13}\text{C}\{^1\text{H}\}$  NMR (100 MHz,  $\text{CDCl}_3$ )  $\delta$  157.7, 157.3, 147.2, 144.0, 139.3, 138.0, 137.1, 136.6, 134.7, 131.9, 130.0, 129.8, 128.7, 128.4, 128.0, 127.7, 125.8, 124.7, 124.3, 123.7, 121.7, 116.1, 110.4, 107.2, 64.2 (q,  $^2J_{\text{C-F}} = 21.7$  Hz), 45.1, 25.8, 21.6 ppm (the C of  $\text{CF}_3$  is not observed).  $^{19}\text{F}$  NMR (376 MHz,  $\text{CDCl}_3$ )  $\delta$  -70.96 ppm. HRMS (ESI-TOF)  $m/z$   $[\text{M} + \text{H}]^+$  calcd for  $\text{C}_{33}\text{H}_{26}\text{ClF}_3\text{N}_3\text{O}_3\text{S}_2^+$  668.1051, found 668.1049.

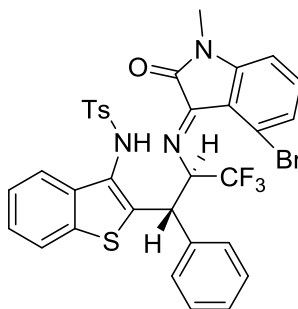

**(*E*)-N-(2-(2-((4-bromo-1-methyl-2-oxoindolin-3-ylidene)amino)-3,3,3-trifluoro-1-phenylpropyl)benzo[*b*]thiophen-3-yl)-4-methylbenzenesulfonamide (5c)**

Yellow solid: 40 mg (yield 56%);  $R_f$  (ethyl acetate : petroleum ether = 1:5) = 0.29; mp 206-208 °C; IR (KBr) 3396, 1719, 1605, 1455, 1339, 1164, 762, 669  $\text{cm}^{-1}$ ;  $^1\text{H}$  NMR (400 MHz,  $\text{CDCl}_3$ )  $\delta$  8.34 (s, 1H), 7.97 (d,  $J = 8.0$  Hz, 1H), 7.85 – 7.71 (m, 3H), 7.50 (d,  $J = 7.8$  Hz, 1H), 7.46 – 7.33 (m, 3H), 7.31 – 7.28 (m, 2H), 7.24 – 7.13 (m, 3H), 6.95 (m, 1H), 6.85 – 6.74 (m, 2H), 6.64 (d,  $J = 7.8$  Hz, 1H), 4.36 (d,

$J = 9.0$  Hz, 1H), 3.02 (s, 3H), 2.55 (s, 3H) ppm.  $^{13}\text{C}\{^1\text{H}\}$  NMR (100 MHz,  $\text{CDCl}_3$ )  $\delta$  157.7, 157.4, 147.5, 144.0, 139.5, 138.0, 137.8, 137.0, 136.6, 134.6, 129.9, 129.0, 128.7, 128.4, 128.0, 127.7, 125.9, 124.7, 124.2, 123.6, 121.7, 119.5, 117.7, 107.7, 63.9 (q,  $^2J_{\text{C-F}} = 28.3$  Hz), 45.1, 25.7, 21.6 ppm (the C of  $\text{CF}_3$  is not observed).  $^{19}\text{F}$  NMR (376 MHz,  $\text{CDCl}_3$ )  $\delta$  -70.45 ppm. HRMS (ESI-TOF)  $m/z$   $[\text{M} + \text{H}]^+$  calcd for  $\text{C}_{33}\text{H}_{26}\text{BrF}_3\text{N}_3\text{O}_3\text{S}_2^+$  712.0546, found 712.0563.

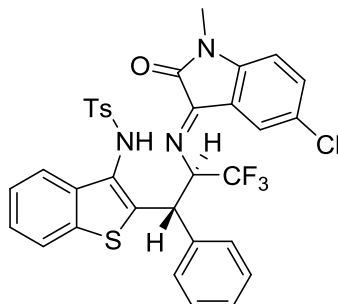

**(*E*)-*N*-(2-(2-((5-chloro-1-methyl-2-oxoindolin-3-ylidene)amino)-3,3,3-trifluoro-1-phenylpropyl)benzo[*b*]thiophen-3-yl)-4-methylbenzenesulfonamide (5d)**

Yellow solid: 44 mg (yield 65%);  $R_f$  (ethyl acetate : petroleum ether = 1:5) = 0.29; mp 205-207 °C; IR (KBr) 3334, 1708, 1612, 1347, 1152, 773, 662, 557  $\text{cm}^{-1}$ ;  $^1\text{H}$  NMR (400 MHz,  $\text{CDCl}_3$ )  $\delta$  7.88 (d,  $J = 8.2$  Hz, 1H), 7.81 (s, 1H), 7.75 (d,  $J = 8.2$  Hz, 2H), 7.69 (d,  $J = 2.0$  Hz, 1H), 7.51 (d,  $J = 8.2$  Hz, 1H), 7.40 – 7.35 (m, 3H), 7.32 – 7.27 (m, 4H), 7.24 – 7.15 (m, 2H), 6.93 – 6.78 (m, 3H), 6.58 (d,  $J = 8.4$  Hz, 1H), 4.48 (d,  $J = 10.0$  Hz, 1H), 3.01 (s, 3H), 2.53 (s, 3H) ppm.  $^{13}\text{C}\{^1\text{H}\}$  NMR (150 MHz,  $\text{CDCl}_3$ )  $\delta$  158.2, 157.8, 144.4, 144.2, 138.2, 137.42, 137.37, 137.0, 136.4, 134.3, 130.0, 129.6, 128.7, 128.1, 127.7, 126.3, 124.8, 124.4, 123.6, 123.5, 122.7, 121.7, 120.9, 110.0, 63.6 (q,  $^2J_{\text{C-F}} = 29.7$  Hz), 45.1, 25.9, 21.6 ppm (the C of  $\text{CF}_3$  is not observed).  $^{19}\text{F}$  NMR (376 MHz,  $\text{CDCl}_3$ )  $\delta$  -70.59 ppm. HRMS (ESI-TOF)  $m/z$   $[\text{M} + \text{H}]^+$  calcd for  $\text{C}_{33}\text{H}_{26}\text{ClF}_3\text{N}_3\text{O}_3\text{S}_2^+$  668.1051, found 668.1058.

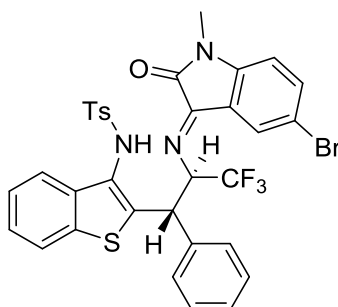

**(*E*)-*N*-(2-(2-((5-bromo-1-methyl-2-oxoindolin-3-ylidene)amino)-3,3,3-trifluoro-1-phenylpropyl)benzo[*b*]thiophen-3-yl)-4-methylbenzenesulfonamide (5e)**

Yellow solid: 46 mg (yield 57%);  $R_f$  (ethyl acetate : petroleum ether = 1:5) = 0.29; mp 209-211 °C; IR (KBr) 3299, 1713, 1609, 1353, 1165, 816, 766, 734, 560  $\text{cm}^{-1}$ ;  $^1\text{H}$  NMR (400 MHz,  $\text{CDCl}_3$ )  $\delta$  7.88 (d,  $J = 7.8$  Hz, 1H), 7.82 (d,  $J = 2.0$  Hz, 1H), 7.79 – 7.73 (m, 3H), 7.56 – 7.47 (m, 2H), 7.37 (d,  $J = 8.0$  Hz, 2H), 7.32 – 7.26 (m, 3H), 7.25 – 7.17 (m, 2H), 6.95 – 6.78 (m, 3H), 6.53 (d,  $J = 8.4$  Hz, 1H), 4.49 (d,  $J = 9.8$  Hz, 1H), 3.01 (s, 3H), 2.53 (s, 3H) ppm.  $^{13}\text{C}\{^1\text{H}\}$  NMR (100 MHz,  $\text{CDCl}_3$ )  $\delta$  158.0, 157.6, 144.8, 144.2, 138.2, 137.42, 137.37, 137.2, 137.0, 136.4, 130.0, 128.7, 128.4, 128.1, 127.7, 126.4, 126.3, 124.8, 124.5, 123.5, 121.7, 121.2, 116.6, 110.4, 64.2 (q,  $^2J_{\text{C-F}} = 26.7$  Hz), 45.1, 25.9, 21.6 ppm (the C of  $\text{CF}_3$  is not observed).  $^{19}\text{F}$  NMR (376 MHz,  $\text{CDCl}_3$ )  $\delta$  -70.59 ppm. HRMS (ESI-TOF)  $m/z$   $[\text{M} + \text{H}]^+$  calcd for  $\text{C}_{33}\text{H}_{26}\text{BrF}_3\text{N}_3\text{O}_3\text{S}_2^+$  712.0546, found 712.0544.

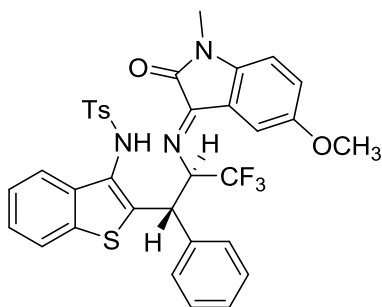

**(E)-4-methyl-N-(2-(3,3,3-trifluoro-2-((5-methoxy-1-methyl-2-oxoindolin-3-ylidene)amino)-1-phenylpropyl)benzo[b]thiophen-3-yl)benzenesulfonamide (5f)**

Brown solid: 41 mg (yield 61%);  $R_f$  (ethyl acetate : petroleum ether = 1:5) = 0.29; mp 210-212 °C; IR (KBr) 3448, 1716, 1618, 1493, 1358, 1242, 1165, 663, 563  $\text{cm}^{-1}$ ;  $^1\text{H}$  NMR (400 MHz,  $\text{CDCl}_3$ )  $\delta$  8.55 (s, 1H), 7.98 (d,  $J$  = 7.8 Hz, 1H), 7.77 (d,  $J$  = 8.2 Hz, 2H), 7.50 (d,  $J$  = 7.8 Hz, 1H), 7.43 – 7.37 (m, 3H), 7.32 – 7.27 (m, 4H), 7.24 – 7.19 (m, 1H), 7.00 – 6.94 (m, 1H), 6.95 – 6.87 (m, 1H), 6.84 – 6.74 (m, 2H), 6.55 (d,  $J$  = 8.4 Hz, 1H), 4.34 (d,  $J$  = 10.2 Hz, 1H), 3.98 (s, 3H), 2.99 (s, 3H), 2.55 (s, 3H) ppm.  $^{13}\text{C}\{^1\text{H}\}$  NMR (100 MHz,  $\text{CDCl}_3$ )  $\delta$  159.3, 158.7, 156.8, 144.1, 140.0, 137.8, 137.6, 137.4, 137.1, 136.5, 130.0, 128.7, 128.4, 128.1, 127.6, 126.4, 124.6, 124.4, 123.7, 122.0, 121.7, 120.2, 64.3 (q,  $^2J_{\text{C-F}}$  = 26.5 Hz), 56.3, 45.2, 25.7, 21.6 ppm (the C of  $\text{CF}_3$  is not observed).  $^{19}\text{F}$  NMR (376 MHz,  $\text{CDCl}_3$ )  $\delta$  -70.18 ppm. HRMS (ESI-TOF)  $m/z$   $[\text{M} + \text{H}]^+$  calcd for  $\text{C}_{34}\text{H}_{29}\text{F}_3\text{N}_3\text{O}_4\text{S}_2^+$  664.1546, found 664.1550.

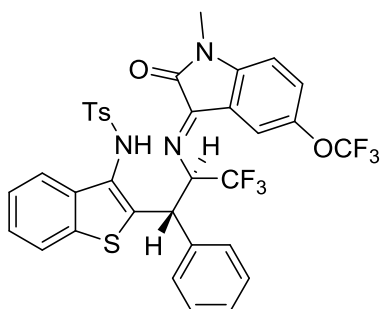

**(E)-4-methyl-N-(2-(3,3,3-trifluoro-2-((1-methyl-2-oxo-5-(trifluoromethoxy)indolin-3-ylidene)amino)-1-phenylpropyl)benzo[b]thiophen-3-yl)benzenesulfonamide (5g)**

Yellow solid: 49 mg (yield 69%);  $R_f$  (ethyl acetate : petroleum ether = 1:5) = 0.29; mp 205-207 °C; IR (KBr) 3448, 1718, 1655, 1492, 1380, 1254, 1166, 759, 663  $\text{cm}^{-1}$ ;  $^1\text{H}$  NMR (400 MHz,  $\text{CDCl}_3$ )  $\delta$  7.82 (dd,  $J$  = 7.2, 2.0 Hz, 1H), 7.78 – 7.72 (m, 2H), 7.63 – 7.59 (s, 1H), 7.52 – 7.46 (m, 1H), 7.36 (d,  $J$  = 8.0 Hz, 2H), 7.32 – 7.26 (m, 4H), 7.24 – 7.16 (m, 3H), 6.97 – 6.80 (m, 3H), 6.63 (d,  $J$  = 8.6 Hz, 1H), 4.48 (d,  $J$  = 9.8 Hz, 1H), 3.02 (s, 3H), 2.53 (s, 3H) ppm.  $^{13}\text{C}\{^1\text{H}\}$  NMR (100 MHz,  $\text{CDCl}_3$ )  $\delta$  158.4, 157.6, 145.4, 144.4, 144.2, 138.1, 137.4, 137.3, 137.0, 136.4, 130.0, 128.8, 128.3, 128.2, 127.7, 126.3, 125.5, 124.8, 124.5, 123.5, 121.8, 121.6, 120.6, 119.2, 117.1, 109.7, 64.3 (q,  $^2J_{\text{C-F}}$  = 27.0 Hz), 45.1, 25.9, 21.6 ppm (the C of  $\text{CF}_3$  is not observed).  $^{19}\text{F}$  NMR (376 MHz,  $\text{CDCl}_3$ )  $\delta$  -58.34, -70.68 ppm. HRMS (ESI-TOF)  $m/z$   $[\text{M} + \text{H}]^+$  calcd for  $\text{C}_{34}\text{H}_{26}\text{F}_6\text{N}_3\text{O}_4\text{S}_2^+$  718.1263, found 718.1268.

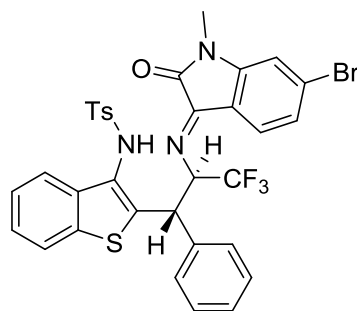

**(E)-N-(2-(2-((6-bromo-2-oxoindolin-3-ylidene)amino)-3,3,3-trifluoro-1-phenylpropyl)benzo[b]thiophen-3-yl)-4-methylbenzenesulfonamide (5h)**

Yellow solid: 40 mg (yield 57%);  $R_f$  (ethyl acetate : petroleum ether = 1:5) = 0.29; mp 215-217 °C; IR (KBr) 3283, 1716, 1607, 1367, 1261, 1163, 1134, 768, 567  $\text{cm}^{-1}$ ;  $^1\text{H}$  NMR (400 MHz,  $\text{CDCl}_3$ )  $\delta$  8.13 (s, 1H), 7.94 (d,  $J$  = 8.2 Hz, 1H), 7.75 (d,  $J$  = 8.2 Hz, 2H), 7.62 (d,  $J$  = 8.0 Hz, 1H), 7.55 – 7.45 (m, 1H), 7.38 (d,  $J$  = 8.0 Hz, 2H), 7.33 – 7.26 (m, 5H), 7.26 – 7.18 (m, 1H), 6.94 – 6.83 (m, 1H), 6.82 – 6.73 (m, 3H), 4.37 (d,  $J$  = 8.0 Hz, 1H), 3.00 (s, 3H), 2.54 (s, 3H) ppm.  $^{13}\text{C}\{^1\text{H}\}$  NMR (100 MHz,  $\text{CDCl}_3$ )  $\delta$  158.4, 157.7, 147.0, 144.2, 137.9, 137.4, 137.3, 137.1, 136.4, 130.0, 129.5, 128.7, 128.3, 128.2, 127.7, 127.0, 126.3, 124.9, 124.8, 123.7, 121.7, 118.5, 112.6, 64.3 (q,  $^2J_{\text{C-F}}$  = 26.5 Hz), 45.0, 25.9, 21.6 ppm (the C of  $\text{CF}_3$  is not observed).  $^{19}\text{F}$  NMR (376 MHz,  $\text{CDCl}_3$ )  $\delta$  -70.51 ppm. HRMS (ESI-TOF)  $m/z$   $[\text{M} + \text{H}]^+$  calcd for  $\text{C}_{33}\text{H}_{26}\text{BrF}_3\text{N}_3\text{O}_3\text{S}_2^+$  712.0546, found 712.0545.

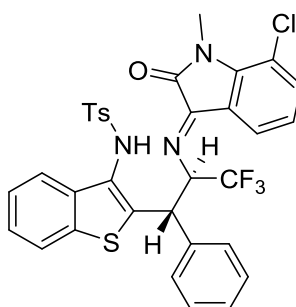

**(E)-N-(2-(2-((7-chloro-1-methyl-2-oxoindolin-3-ylidene)amino)-3,3,3-trifluoro-1-phenylpropyl)benzo[b]thiophen-3-yl)-4-methylbenzenesulfonamide (5i)**

Yellow solid: 36 mg (yield 54%);  $R_f$  (ethyl acetate : petroleum ether = 1:5) = 0.29; mp 208-210 °C; IR (KBr) 3289, 1708, 1607, 1454, 1363, 1165, 1122, 769, 661  $\text{cm}^{-1}$ ;  $^1\text{H}$  NMR (400 MHz,  $\text{CDCl}_3$ )  $\delta$  8.03 (s, 1H), 7.96 – 7.89 (m, 1H), 7.74 (d,  $J$  = 8.0 Hz, 2H), 7.68 (dd,  $J$  = 7.6, 1.2 Hz, 1H), 7.52 (d,  $J$  = 7.8 Hz, 1H), 7.42 – 7.27 (m, 6H), 7.25 – 7.19 (m, 2H), 7.08 (t,  $J$  = 7.8 Hz, 1H), 6.94 – 6.85 (m, 1H), 6.84 – 6.75 (m, 2H), 4.38 (d,  $J$  = 9.0 Hz, 1H), 3.38 (s, 3H), 2.54 (s, 3H) ppm.  $^{13}\text{C}\{^1\text{H}\}$  NMR (100 MHz,  $\text{CDCl}_3$ )  $\delta$  158.7, 157.8, 144.2, 141.6, 137.9, 137.4, 137.3, 137.1, 136.9, 136.4, 130.0, 128.7, 128.3, 128.2, 127.7, 127.7, 126.2, 124.9, 124.7, 124.5, 123.6, 122.4, 122.2, 121.8, 121.7, 116.5, 64.4 (q,  $^2J_{\text{C-F}}$  = 26.4 Hz), 45.0, 29.0, 21.8 ppm (the C of  $\text{CF}_3$  is not observed).  $^{19}\text{F}$  NMR (376 MHz,  $\text{CDCl}_3$ )  $\delta$  -70.50 ppm. HRMS (ESI-TOF)  $m/z$   $[\text{M} + \text{H}]^+$  calcd for  $\text{C}_{33}\text{H}_{26}\text{ClF}_3\text{N}_3\text{O}_3\text{S}_2^+$  668.1051, found 668.1058.



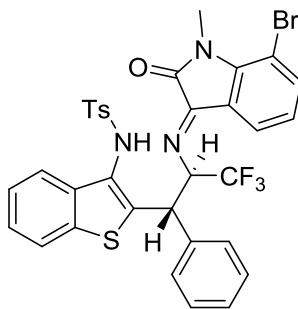

**(E)-N-(2-(2-((7-bromo-1-methyl-2-oxoindolin-3-ylidene)amino)-3,3,3-trifluoro-1-phenylpropyl)benzo[b]thiophen-3-yl)-4-methylbenzenesulfonamide (5j)**

Yellow solid: 36 mg (yield 50%);  $R_f$  (ethyl acetate : petroleum ether = 1:5) = 0.29; mp 200-202 °C; IR (KBr) 3289, 1707, 1604, 1456, 1362, 1165, 1092, 767, 659  $\text{cm}^{-1}$ ;  $^1\text{H}$  NMR (400 MHz,  $\text{CDCl}_3$ )  $\delta$  8.02 (s, 1H), 7.96 – 7.83 (m, 1H), 7.81 – 7.59 (m, 3H), 7.55 – 7.45 (m, 2H), 7.37 (d,  $J$  = 8.0 Hz, 2H), 7.31 – 7.26 (m, 3H), 7.26 – 7.19 (m, 2H), 7.06 – 6.97 (m, 1H), 6.94 – 6.84 (m, 1H), 6.83 – 6.71 (m, 2H), 4.37 (d,  $J$  = 12.0 Hz, 1H), 3.40 (s, 3H), 2.54 (s, 3H) ppm.  $^{13}\text{C}\{^1\text{H}\}$  NMR (100 MHz,  $\text{CDCl}_3$ )  $\delta$  158.9, 157.7, 144.2, 143.1, 140.2, 137.9, 137.3, 137.1, 136.4, 130.0, 128.7, 128.3, 128.2, 127.7, 126.2, 125.1, 124.9, 124.5, 123.6, 122.72, 122.70, 121.8, 64.5 (q,  $^2J_{\text{C-F}}$  = 26.4 Hz), 45.0, 29.1, 21.6 ppm (the C of  $\text{CF}_3$  is not observed).  $^{19}\text{F}$  NMR (376 MHz,  $\text{CDCl}_3$ )  $\delta$  -70.53 ppm. HRMS (ESI-TOF)  $m/z$   $[\text{M} + \text{H}]^+$  calcd for  $\text{C}_{33}\text{H}_{26}\text{BrF}_3\text{N}_3\text{O}_3\text{S}_2^+$  712.0546, found 712.0534.

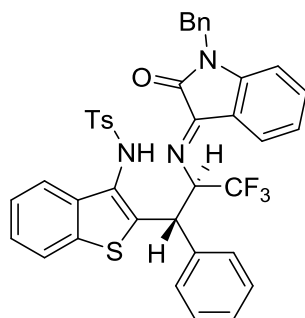

**(E)-N-(2-(2-((1-benzyl-2-oxoindolin-3-ylidene)amino)-3,3,3-trifluoro-1-phenylpropyl)benzo[b]thiophen-3-yl)-4-methylbenzenesulfonamide (5k)**

Yellow solid: 43 mg (yield 61%);  $R_f$  (ethyl acetate : petroleum ether = 1:5) = 0.29; mp 226-228 °C; IR (KBr) 3220, 1716, 1609, 1473, 1346, 1178, 1154, 645, 548  $\text{cm}^{-1}$ ;  $^1\text{H}$  NMR (400 MHz,  $\text{CDCl}_3$ )  $\delta$  8.09 (s, 1H), 7.99 – 7.87 (m, 1H), 7.77 (t,  $J$  = 7.4 Hz, 3H), 7.56 – 7.45 (m, 1H), 7.39 (d,  $J$  = 8.0 Hz, 2H), 7.31 – 7.27 (m, 4H), 7.28 – 7.20 (m, 5H), 7.12 (m, 1H), 7.03 – 6.92 (m, 3H), 6.90 – 6.74 (m, 2H), 6.46 (d,  $J$  = 7.8 Hz, 1H), 4.76 (d,  $J$  = 15.8 Hz, 1H), 4.64 (d,  $J$  = 15.8 Hz, 1H), 4.38 (d,  $J$  = 10.0 Hz, 1H), 2.55 (s, 3H) ppm.  $^{13}\text{C}\{^1\text{H}\}$  NMR (100 MHz,  $\text{CDCl}_3$ )  $\delta$  158.7, 158.3, 145.3, 144.1, 138.0, 137.5, 137.0, 136.4, 134.8, 134.3, 130.0, 129.0, 128.7, 128.4, 128.1, 127.9, 127.7, 126.9, 126.3, 124.8, 124.4, 123.9, 123.73, 123.68, 121.7, 119.8, 109.9, 64.3 (q,  $^2J_{\text{C-F}}$  = 26.8 Hz), 45.1, 43.5, 21.6 ppm (the C of  $\text{CF}_3$  is not observed).  $^{19}\text{F}$  NMR (376 MHz,  $\text{CDCl}_3$ )  $\delta$  -70.65 ppm. HRMS (ESI-TOF)  $m/z$   $[\text{M} + \text{H}]^+$  calcd for  $\text{C}_{39}\text{H}_{31}\text{F}_3\text{N}_3\text{O}_3\text{S}_2^+$  710.1753, found 710.1754.

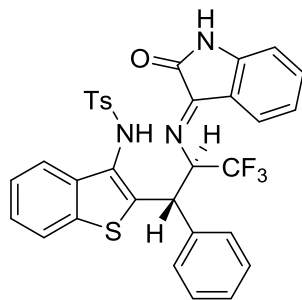

**(E)-4-methyl-N-(2-(3,3,3-trifluoro-2-((2-oxoindolin-3-ylidene)amino)-1-phenylpropyl)benzo[b]thiophen-3-yl)benzenesulfonamide (5l)**

Yield solid: 41 mg (yield 67%);  $R_f$  (ethyl acetate : petroleum ether = 1:5) = 0.29; mp 231-233 °C; IR (KBr) 3256, 1719, 1619, 1470, 1355, 1253, 1165, 756, 663  $\text{cm}^{-1}$ ;  $^1\text{H}$  NMR (400 MHz,  $\text{CDCl}_3$ )  $\delta$  8.20 (s, 1H), 7.95 (d,  $J$  = 8.0 Hz, 1H), 7.83 – 7.68 (m, 3H), 7.50 (d,  $J$  = 7.8 Hz, 1H), 7.43 – 7.32 (m, 4H), 7.30 – 7.26 (m, 3H), 7.25 – 7.12 (m, 3H), 6.92 – 6.76 (m, 3H), 6.65 (d,  $J$  = 7.8 Hz, 1H), 4.41 (d,  $J$  = 10.0 Hz, 1H), 2.54 (s, 3H) ppm.  $^{13}\text{C}\{^1\text{H}\}$  NMR (100 MHz,  $\text{CDCl}_3$ )  $\delta$  159.5, 158.3, 144.2, 143.3, 138.7, 138.0, 137.5, 137.0, 136.5, 135.1, 130.0, 128.7, 128.3, 128.1, 127.7, 126.3, 124.8, 124.4, 124.2, 124.0, 123.7, 121.8, 120.4, 110.7, 64.0 (q,  $^2J_{\text{C-F}}$  = 25.3 Hz), 45.1, 21.6 ppm (the C of  $\text{CF}_3$  is not observed).  $^{19}\text{F}$  NMR (376 MHz,  $\text{CDCl}_3$ )  $\delta$  -70.76 ppm. HRMS (ESI-TOF)  $m/z$   $[\text{M} + \text{H}]^+$  calcd for  $\text{C}_{32}\text{H}_{25}\text{F}_3\text{N}_3\text{O}_3\text{S}_2^+$  620.1284, found 620.1284.

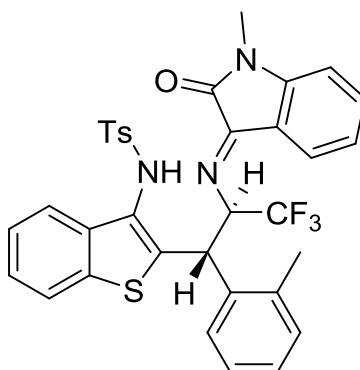

**(E)-4-methyl-N-(2-(3,3,3-trifluoro-2-((1-methyl-2-oxoindolin-3-ylidene)amino)-1-(o-tolyl)propyl)benzo[b]thiophen-3-yl)benzenesulfonamide (5m)**

Yellow solid: 45 mg (yield 70%);  $R_f$  (ethyl acetate : petroleum ether = 1:5) = 0.29; mp 189-191 °C; IR (KBr) 3467, 1713, 1613, 1355, 1160, 860, 758, 563  $\text{cm}^{-1}$ ;  $^1\text{H}$  NMR (400 MHz,  $\text{CDCl}_3$ )  $\delta$  8.20 (s, 1H), 7.83 (t,  $J$  = 7.4 Hz, 3H), 7.69 – 7.58 (m, 1H), 7.56 – 7.45 (m, 2H), 7.47 – 7.38 (m, 1H), 7.31 (d,  $J$  = 8.2 Hz, 2H), 7.24 – 7.09 (m, 6H), 7.08 – 7.00 (m, 1H), 6.66 (d,  $J$  = 7.8 Hz, 1H), 5.37 (d,  $J$  = 8.6 Hz, 1H), 3.01 (s, 3H), 2.45 (s, 3H), 1.89 (s, 3H) ppm.  $^{13}\text{C}\{^1\text{H}\}$  NMR (100 MHz,  $\text{CDCl}_3$ )  $\delta$  158.8, 158.5, 146.2, 144.0, 138.4, 137.9, 137.3, 136.5, 136.4, 134.8, 130.9, 128.0, 127.8, 127.5, 126.7, 126.0, 124.5, 124.1, 123.84, 123.79, 123.0, 121.8, 119.9, 108.9, 63.9 (q,  $^2J_{\text{C-F}}$  = 27.0 Hz), 40.5, 25.7, 21.6, 19.0 ppm (the C of  $\text{CF}_3$  is not observed).  $^{19}\text{F}$  NMR (376 MHz,  $\text{CDCl}_3$ )  $\delta$  -70.99 ppm. HRMS (ESI-TOF)  $m/z$   $[\text{M} + \text{H}]^+$  calcd for  $\text{C}_{34}\text{H}_{29}\text{F}_3\text{N}_3\text{O}_3\text{S}_2^+$  648.1597, found 648.1597.

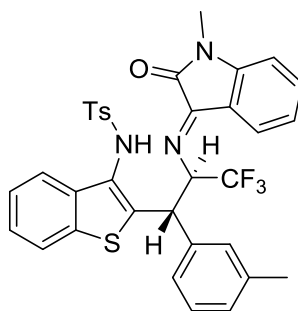

**(E)-4-methyl-N-(2-(3,3,3-trifluoro-2-((1-methyl-2-oxoindolin-3-ylidene)amino)-1-(m-tolyl)propyl)benzo[b]thiophen-3-yl)benzenesulfonamide (5n)**

Yellow solid: 34 mg (yield 53%);  $R_f$  (ethyl acetate : petroleum ether = 1:5) = 0.29; mp 196-198 °C; IR (KBr) 3448, 1707, 1612, 1473, 1369, 1194, 752, 660  $\text{cm}^{-1}$ ;  $^1\text{H}$  NMR (400 MHz,  $\text{CDCl}_3$ )  $\delta$  8.44 (s, 1H), 7.98 (d,  $J$  = 8.0 Hz, 1H), 7.89 – 7.71 (m, 3H), 7.49 (d,  $J$  = 7.8 Hz, 1H), 7.45 – 7.35 (m, 3H), 7.28 – 7.14 (m, 4H), 7.10 (d,  $J$  = 7.6 Hz, 1H), 6.95 (m, 1H), 6.73 (d,  $J$  = 7.6 Hz, 1H), 6.65 (d,  $J$  = 7.8 Hz, 1H), 6.46 (s, 1H), 4.35 (d,  $J$  = 10.4 Hz, 1H), 3.03 (s, 3H), 2.54 (s, 3H), 2.32 (s, 3H) ppm.  $^{13}\text{C}\{^1\text{H}\}$  NMR (100 MHz,  $\text{CDCl}_3$ )  $\delta$  158.8, 158.7, 146.1, 144.0, 138.4, 138.2, 137.7, 137.4, 137.1, 136.6, 134.9, 130.0, 129.1, 128.9, 128.5, 127.7, 126.2, 125.2, 124.7, 124.3, 124.0, 123.8, 123.7, 121.7, 119.7, 108.9, 64.0 (q,  $^2J_{\text{C-F}}$  = 26.7 Hz), 45.0, 25.8, 21.7, 21.6 ppm (the C of  $\text{CF}_3$  is not observed).  $^{19}\text{F}$  NMR (376 MHz,  $\text{CDCl}_3$ )  $\delta$  -70.37 ppm. HRMS (ESI-TOF)  $m/z$   $[\text{M} + \text{H}]^+$  calcd for  $\text{C}_{34}\text{H}_{29}\text{F}_3\text{N}_3\text{O}_3\text{S}_2^+$  648.1597, found 648.1591.

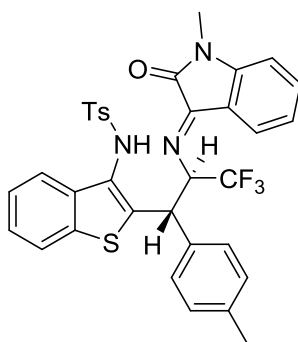

**(E)-4-methyl-N-(2-(3,3,3-trifluoro-2-((1-methyl-2-oxoindolin-3-ylidene)amino)-1-(p-tolyl)propyl)benzo[b]thiophen-3-yl)benzenesulfonamide (5o)**

Yellow solid: 33 mg (yield 52%);  $R_f$  (ethyl acetate : petroleum ether = 1:5) = 0.29; mp 200-202 °C; IR (KBr) 3390, 1712, 1614, 1495, 1470, 1168, 818, 666  $\text{cm}^{-1}$ ;  $^1\text{H}$  NMR (400 MHz,  $\text{CDCl}_3$ )  $\delta$  8.36 (s, 1H), 7.98 (d,  $J$  = 8.5 Hz, 2H), 7.77 (t,  $J$  = 8.5 Hz, 2H), 7.59 – 7.47 (m, 2H), 7.47 – 7.34 (m, 4H), 7.19 (dd,  $J$  = 11.7, 8.8 Hz, 4H), 7.08 (d,  $J$  = 7.8 Hz, 2H), 6.73 – 6.60 (m, 3H), 4.32 (d, 1H), 3.02 (s, 3H), 2.55 (s, 3H), 2.34 (s, 3H) ppm.  $^{13}\text{C}\{^1\text{H}\}$  NMR (100 MHz,  $\text{CDCl}_3$ )  $\delta$  158.8, 158.7, 144.7, 143.4, 143.3, 137.8, 137.7, 136.5, 136.2, 130.5, 129.6, 129.5, 129.4, 128.7, 128.5, 128.2, 124.7, 124.6, 124.5, 123.9, 123.2, 122.5, 121.9, 108.6, 63.3 (q,  $^2J_{\text{C-F}}$  = 24.6 Hz), 50.8, 25.9, 21.6, 21.1 ppm (the C of  $\text{CF}_3$  is not observed).  $^{19}\text{F}$  NMR (376 MHz,  $\text{CDCl}_3$ )  $\delta$  -70.37 ppm. HRMS (ESI-TOF)  $m/z$   $[\text{M} + \text{H}]^+$  calcd for  $\text{C}_{34}\text{H}_{29}\text{F}_3\text{N}_3\text{O}_3\text{S}_2^+$  648.1597, found 648.1594.

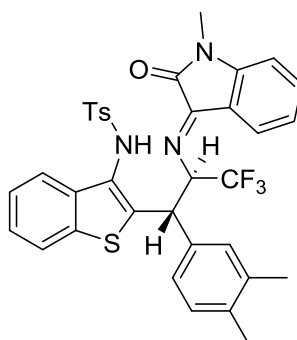

**(*E*)-*N*-(2-(1-(3,4-dimethylphenyl)-3,3,3-trifluoro-2-((1-methyl-2-oxoindolin-3-ylidene)amino)propyl)benzo[*b*]thiophen-3-yl)-4-methylbenzenesulfonamide (**5p**)**

Yellow solid: 40 mg (yield 60%);  $R_f$  (ethyl acetate : petroleum ether = 1:5) = 0.29; mp 209-211 °C; IR (KBr) 3441, 1711, 1613, 1370, 1165, 1050, 882, 761, 565  $\text{cm}^{-1}$ ;  $^1\text{H}$ NMR (400 MHz,  $\text{CDCl}_3$ )  $\delta$  8.43 (s, 1H), 7.98 (d,  $J = 8.0$  Hz, 1H), 7.79 (dd,  $J = 7.6, 3.4$  Hz, 3H), 7.48 (d,  $J = 8.0$  Hz, 1H), 7.44 – 7.34 (m, 3H), 7.25 – 7.13 (m, 3H), 7.05 (d,  $J = 7.8$  Hz, 1H), 6.99 – 6.86 (m, 1H), 6.64 (d,  $J = 7.8$  Hz, 2H), 6.45 (s, 1H), 4.32 (d,  $J = 10.4$  Hz, 1H), 3.03 (s, 3H), 2.55 (s, 3H), 2.23 (d,  $J = 5.8$  Hz, 6H) ppm.  $^{13}\text{C}\{^1\text{H}\}$  NMR (100 MHz,  $\text{CDCl}_3$ )  $\delta$  158.8, 158.7, 146.1, 143.9, 138.6, 137.7, 137.1, 137.0, 136.7, 136.5, 134.8, 130.0, 129.8, 129.5, 129.0, 127.7, 127.2, 126.1, 125.4, 124.6, 124.3, 124.0, 123.7, 121.7, 119.7, 108.9, 64.1 (q,  $^2J_{\text{C-F}} = 25.8$  Hz), 44.6, 25.7, 21.8, 19.9, 19.5 ppm (the C of  $\text{CF}_3$  is not observed).  $^{19}\text{F}$  NMR (376 MHz,  $\text{CDCl}_3$ )  $\delta$  -70.31 ppm. HRMS (ESI-TOF)  $m/z$   $[\text{M} + \text{H}]^+$  calcd for  $\text{C}_{35}\text{H}_{31}\text{F}_3\text{N}_3\text{O}_3\text{S}_2^+$  662.1753, found 662.1750.

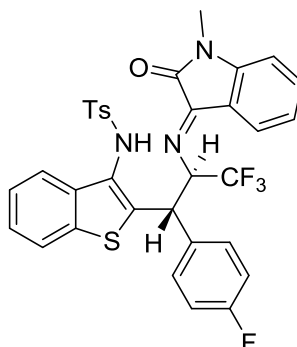

**(*E*)-4-methyl-*N*-(2-(3,3,3-trifluoro-1-(4-fluorophenyl)-2-((1-methyl-2-oxoindolin-3-ylidene)amino)propyl)benzo[*b*]thiophen-3-yl)benzenesulfonamide (**5q**)**

Yellow solid: 44 mg (yield 67%);  $R_f$  (ethyl acetate : petroleum ether = 1:5) = 0.29; mp 206-208 °C; IR (KBr) 3438, 1708, 1611, 1374, 1162, 1047, 881, 756, 563  $\text{cm}^{-1}$ ;  $^1\text{H}$  NMR (400 MHz,  $\text{CDCl}_3$ )  $\delta$  8.24 (s, 1H), 8.00 – 7.88 (m, 1H), 7.76 (d,  $J = 8.4$  Hz, 3H), 7.57 – 7.46 (m, 1H), 7.42 (m, 1H), 7.37 (d,  $J = 8.2$  Hz, 2H), 7.25 – 7.11 (m, 4H), 6.97 (t,  $J = 8.6$  Hz, 2H), 6.93 – 6.85 (m, 1H), 6.78 (dd,  $J = 8.6, 5.2$  Hz, 2H), 6.65 (d,  $J = 7.8$  Hz, 1H), 4.40 (d,  $J = 10.2$  Hz, 1H), 3.02 (s, 3H), 2.54 (s, 3H) ppm.  $^{13}\text{C}\{^1\text{H}\}$  NMR (100 MHz,  $\text{CDCl}_3$ )  $\delta$  162.3 (d,  $J = 246.2$  Hz), 158.8, 158.6, 146.1, 144.1, 137.8, 137.5, 136.9, 136.4, 134.9, 133.3 (d,  $J = 3.2$  Hz), 129.97 (d,  $J = 7.2$  Hz), 129.95, 127.7, 126.3, 124.8, 124.4, 124.0, 123.71, 123.67, 121.7, 119.6, 115.6 (d,  $J = 21.4$  Hz), 108.9, 64.1 (q,  $^2J_{\text{C-F}} = 26.3$  Hz), 44.3, 25.7, 21.6 ppm.  $^{19}\text{F}$  NMR (376 MHz,  $\text{CDCl}_3$ )  $\delta$  -70.43, -113.64 ppm (the C of  $\text{CF}_3$  is not observed). HRMS (ESI-TOF)  $m/z$   $[\text{M} + \text{H}]^+$  calcd for  $\text{C}_{33}\text{H}_{26}\text{F}_4\text{N}_3\text{O}_3\text{S}_2^+$  652.1346, found 652.1338.

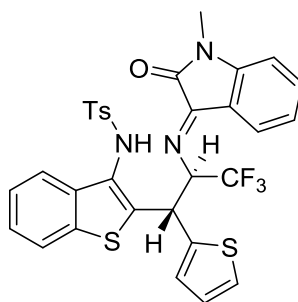

**(E)-4-methyl-N-(2-(3,3,3-trifluoro-2-((1-methyl-2-oxoindolin-3-ylidene)amino)-1-(thiophen-2-yl)propyl)benzo[b]thiophen-3-yl)benzenesulfonamide (5r)**

Yellow solid: 40 mg (yield 62%);  $R_f$  (ethyl acetate : petroleum ether = 1:5) = 0.29; mp 205-207 °C; IR (KBr) 3448, 1707, 1612, 1560, 1473, 1363, 1165, 1125, 762, 564  $\text{cm}^{-1}$ ;  $^1\text{H}$  NMR (400 MHz,  $\text{CDCl}_3$ )  $\delta$  8.17 (s, 1H), 7.94 (d,  $J$  = 7.8 Hz, 1H), 7.83 – 7.68 (m, 3H), 7.56 – 7.49 (m, 1H), 7.45 – 7.39 (m, 1H), 7.36 (d,  $J$  = 8.2 Hz, 2H), 7.25 – 7.18 (m, 3H), 7.15 (t,  $J$  = 7.6 Hz, 1H), 7.02 – 6.95 (m, 1H), 6.91 – 6.84 (m, 2H), 6.65 (d,  $J$  = 7.8 Hz, 1H), 4.59 (d,  $J$  = 9.6 Hz, 1H), 3.04 (s, 3H), 2.51 (s, 3H) ppm.  $^{13}\text{C}\{^1\text{H}\}$  NMR (100 MHz,  $\text{CDCl}_3$ )  $\delta$  159.0, 158.6, 146.2, 139.7, 138.2, 137.2, 137.0, 136.8, 135.0, 130.2, 127.3, 126.9, 126.6, 126.2, 125.3, 125.2, 124.9, 124.4, 124.0, 123.8, 123.7, 121.8, 119.7, 108.9, 65.0 (q,  $^2J_{\text{C-F}}$  = 26.3 Hz), 39.6, 25.8, 21.8 ppm (the C of  $\text{CF}_3$  is not observed).  $^{19}\text{F}$  NMR (376 MHz,  $\text{CDCl}_3$ )  $\delta$  -70.54 ppm. HRMS (ESI-TOF)  $m/z$   $[\text{M} + \text{H}]^+$  calcd for  $\text{C}_{31}\text{H}_{25}\text{F}_3\text{N}_3\text{O}_3\text{S}_3^+$  640.1005, found 640.1010.

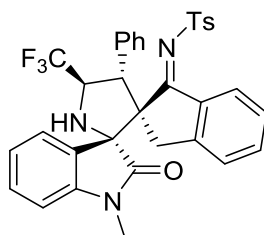

**(E)-4-methyl-N-(1''-methyl-2''-oxo-4'-phenyl-5'-(trifluoromethyl)dispiro[indene-2,3'-pyrrolidine-2',3''-indolin]-1(3H)-ylidene)benzenesulfonamide (6a)**

White solid: 55 mg (yield 89%);  $R_f$  (ethyl acetate : petroleum ether = 1:5) = 0.37; mp 187-189 °C; IR (KBr) 3331, 1703, 1615, 1326, 1137, 734, 680, 560  $\text{cm}^{-1}$ ;  $^1\text{H}$  NMR (400 MHz,  $\text{CDCl}_3$ )  $\delta$  8.10 (d,  $J$  = 8.0 Hz, 1H), 7.89 (d,  $J$  = 8.4 Hz, 2H), 7.51 (d,  $J$  = 7.4 Hz, 1H), 7.45 (d,  $J$  = 8.2 Hz, 2H), 7.43 – 7.37 (m, 1H), 7.33 – 7.28 (m, 1H), 7.24 (d,  $J$  = 7.6 Hz, 1H), 7.21 – 7.12 (m, 5H), 7.11 – 7.05 (m, 2H), 6.59 (d,  $J$  = 7.8 Hz, 1H), 4.82 – 4.69 (m, 1H), 4.47 (d,  $J$  = 11.2 Hz, 1H), 3.66 (d,  $J$  = 15.8 Hz, 1H), 3.04 (d,  $J$  = 7.8 Hz, 1H), 2.95 (d,  $J$  = 15.8 Hz, 1H), 2.62 (s, 3H), 2.54 (s, 3H) ppm.  $^{13}\text{C}\{^1\text{H}\}$  NMR (100 MHz,  $\text{CDCl}_3$ )  $\delta$  181.0, 176.5, 150.3, 143.8, 141.5, 138.6, 134.9, 134.7, 132.4, 130.2, 129.8, 129.5, 129.33, 129.25, 128.5, 127.8, 127.2, 127.1, 125.9, 125.7, 123.1, 108.3, 100.0, 74.6, 70.8, 62.3 (q,  $^2J_{\text{C-F}}$  = 29.7 Hz), 49.0, 33.4, 25.8, 21.7 ppm. (the C of  $\text{CF}_3$  is not scanned).  $^{19}\text{F}$  NMR (376 MHz,  $\text{CDCl}_3$ )  $\delta$  -74.19 ppm. HRMS (ESI-TOF)  $m/z$   $[\text{M} + \text{H}]^+$  calcd for  $\text{C}_{34}\text{H}_{29}\text{F}_3\text{N}_3\text{O}_3\text{S}^+$  616.1876, found 616.1880.

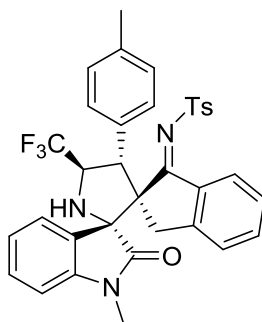

**(*E*)-4-methyl-*N*-(1''-methyl-2''-oxo-4'-(*p*-tolyl)-5'-(trifluoromethyl)dispiro[indene-2,3'-pyrrolidine-2',3''-indolin]-1(3*H*)-ylidene)benzenesulfonamide (6b)**

White solid: 58 mg (yield 92%);  $R_f$  (ethyl acetate : petroleum ether = 1:5) = 0.37; mp 189-191 °C; IR (KBr) 3330, 1706, 1616, 1324, 1157, 747, 692, 560  $\text{cm}^{-1}$ ;  $^1\text{H}$  NMR (400 MHz,  $\text{CDCl}_3$ )  $\delta$  8.11 (d,  $J$  = 8.0 Hz, 1H), 7.88 (d,  $J$  = 8.4 Hz, 2H), 7.51 (d,  $J$  = 7.4 Hz, 1H), 7.46 (d,  $J$  = 8.0 Hz, 2H), 7.43 – 7.37 (m, 1H), 7.35 – 7.28 (m, 1H), 7.28 – 7.24 (m, 1H), 7.22 – 7.07 (m, 2H), 7.06 – 6.93 (m, 4H), 6.60 (d,  $J$  = 7.6 Hz, 1H), 4.86 – 4.61 (m, 1H), 4.44 (d,  $J$  = 11.0 Hz, 1H), 3.67 (d,  $J$  = 15.8 Hz, 1H), 3.05 (d,  $J$  = 8.6 Hz, 1H), 2.97 (d,  $J$  = 15.8 Hz, 1H), 2.60 (s, 3H), 2.54 (s, 3H), 2.27 (s, 3H) ppm.  $^{13}\text{C}\{^1\text{H}\}$  NMR (100 MHz,  $\text{CDCl}_3$ )  $\delta$  180.8, 176.4, 150.5, 143.8, 141.4, 138.6, 137.5, 134.7, 132.4, 131.7, 130.0, 129.7, 129.5, 129.4, 129.3, 129.2, 127.2, 127.1, 125.9, 125.8, 123.0, 108.3, 74.5, 70.9, 62.1 (q,  $^2J_{\text{C-F}}$  = 29.5 Hz), 48.6, 33.1, 25.8, 21.7, 21.0 ppm. (the C of  $\text{CF}_3$  is not scanned).  $^{19}\text{F}$  NMR (376 MHz,  $\text{CDCl}_3$ )  $\delta$  -74.12 ppm. HRMS (ESI-TOF)  $m/z$   $[\text{M} + \text{H}]^+$  calcd for  $\text{C}_{35}\text{H}_{31}\text{F}_3\text{N}_3\text{O}_3\text{S}^+$  630.2033, found 630.2035.

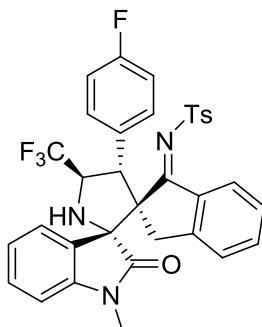

**(*E*)-*N*-(4'-(4-fluorophenyl)-1''-methyl-2''-oxo-5'-(trifluoromethyl)dispiro[indene-2,3'-pyrrolidine-2',3''-indolin]-1(3*H*)-ylidene)-4-methylbenzenesulfonamide (6c)**

White solid: 53 mg (yield 83%);  $R_f$  (ethyl acetate : petroleum ether = 1:5) = 0.37; mp 184-186 °C; IR (KBr) 3331, 1702, 1615, 1325, 1135, 756, 692, 541  $\text{cm}^{-1}$ ;  $^1\text{H}$  NMR (400 MHz,  $\text{CDCl}_3$ )  $\delta$  8.11 (d,  $J$  = 7.8 Hz, 1H), 7.89 (d,  $J$  = 8.4 Hz, 2H), 7.50 (d,  $J$  = 7.2 Hz, 1H), 7.46 (d,  $J$  = 8.0 Hz, 2H), 7.43 – 7.37 (m, 1H), 7.33 – 7.27 (m, 1H), 7.24 (d,  $J$  = 8.0 Hz, 1H), 7.21 – 7.11 (m, 2H), 7.11 – 7.04 (m, 2H), 6.89 (t,  $J$  = 8.6 Hz, 2H), 6.59 (d,  $J$  = 7.6 Hz, 1H), 4.81 – 4.62 (m, 1H), 4.45 (d,  $J$  = 10.8 Hz, 1H), 3.60 (d,  $J$  = 15.8 Hz, 1H), 3.01 (d,  $J$  = 8.4 Hz, 1H), 2.88 (d,  $J$  = 15.8 Hz, 1H), 2.65 (s, 3H), 2.54 (s, 3H) ppm.  $^{13}\text{C}\{^1\text{H}\}$  NMR (100 MHz,  $\text{CDCl}_3$ )  $\delta$  181.3, 176.5, 162.1 (d,  $J$  = 245.9 Hz), 150.1, 143.9, 141.5, 138.5, 134.8, 132.3, 131.8, 131.7 (d,  $J$  = 7.9 Hz), 130.9, 129.8, 129.6, 129.5, 129.4, 129.0, 127.3, 127.1, 125.8, 125.7, 123.1, 115.5 (d,  $J$  = 21.1 Hz), 108.3, 74.5, 70.5, 62.5 (q,  $^2J_{\text{C-F}}$  = 29.4 Hz), 48.5, 33.6, 25.8, 21.7 ppm.  $^{19}\text{F}$  NMR (376 MHz,  $\text{CDCl}_3$ )  $\delta$  -74.20, -114.23 ppm. (the C of  $\text{CF}_3$  is not scanned). HRMS (ESI-TOF)  $m/z$   $[\text{M} + \text{H}]^+$  calcd for  $\text{C}_{34}\text{H}_{28}\text{F}_4\text{N}_3\text{O}_3\text{S}^+$  634.1782, found 634.1783.

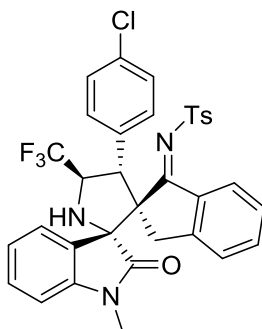

**(*E*)-*N*-(4'-(4-chlorophenyl)-1''-methyl-2''-oxo-5''-(trifluoromethyl)dispiro[indene-2,3'-pyrrolidine-2',3''-indolin]-1(3*H*)-ylidene)-4-methylbenzenesulfonamide (6d)**

White solid: 51 mg (yield 81%);  $R_f$  (ethyl acetate : petroleum ether = 1:5) = 0.37; mp 194-196 °C; IR (KBr) 3330, 1704, 1615, 1327, 1138, 748, 680, 560  $\text{cm}^{-1}$ ;  $^1\text{H}$  NMR (400 MHz,  $\text{CDCl}_3$ )  $\delta$  8.12 (d,  $J$  = 8.0 Hz, 1H), 7.88 (d,  $J$  = 8.4 Hz, 2H), 7.51 – 7.44 (m, 3H), 7.44 – 7.37 (m, 1H), 7.33 – 7.27 (m, 1H), 7.24 (d,  $J$  = 7.8 Hz, 1H), 7.21 – 7.11 (m, 4H), 7.04 (d,  $J$  = 8.4 Hz, 2H), 6.59 (d,  $J$  = 7.8 Hz, 1H), 4.80 – 4.52 (m, 1H), 4.43 (d,  $J$  = 10.8 Hz, 1H), 3.59 (d,  $J$  = 15.6 Hz, 1H), 3.00 (d,  $J$  = 8.4 Hz, 1H), 2.86 (d,  $J$  = 16.0 Hz, 1H), 2.65 (s, 3H), 2.54 (s, 3H) ppm.  $^{13}\text{C}\{^1\text{H}\}$  NMR (100 MHz,  $\text{CDCl}_3$ )  $\delta$  181.2, 176.5, 150.1, 143.9, 141.5, 138.5, 134.8, 133.7, 133.7, 132.3, 131.5, 129.9, 129.6, 129.5, 128.9, 128.7, 127.4, 127.1, 125.8, 125.7, 123.1, 108.3, 74.5, 70.4, 62.4 (q,  $^2J_{\text{C-F}}$  = 29.6 Hz), 48.6, 33.6, 25.8, 21.8 ppm. (the C of  $\text{CF}_3$  is not scanned).  $^{19}\text{F}$  NMR (376 MHz,  $\text{CDCl}_3$ )  $\delta$  -74.21 ppm. HRMS (ESI-TOF)  $m/z$   $[\text{M} + \text{H}]^+$  calcd for  $\text{C}_{34}\text{H}_{28}\text{ClF}_4\text{N}_3\text{O}_3\text{S}^+$  650.1487, found 650.1498.

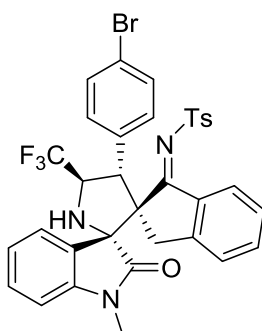

**(*E*)-*N*-(4'-(4-bromophenyl)-1''-methyl-2''-oxo-5''-(trifluoromethyl)dispiro[indene-2,3'-pyrrolidine-2',3''-indolin]-1(3*H*)-ylidene)-4-methylbenzenesulfonamide (6e)**

White solid: 52 mg (yield 82%);  $R_f$  (ethyl acetate : petroleum ether = 1:5) = 0.37; mp 192-194 °C; IR (KBr) 3331, 1706, 1616, 1321, 1138, 747, 692, 541  $\text{cm}^{-1}$ ;  $^1\text{H}$  NMR (400 MHz,  $\text{CDCl}_3$ )  $\delta$  8.12 (d,  $J$  = 8.0 Hz, 1H), 7.88 (d,  $J$  = 8.4 Hz, 2H), 7.52 – 7.44 (m, 3H), 7.43 – 7.38 (m, 1H), 7.35 – 7.30 (m, 2H), 7.28 (dd,  $J$  = 7.8, 1.0 Hz, 1H), 7.24 (d,  $J$  = 7.8 Hz, 1H), 7.20 – 7.10 (m, 2H), 6.99 (d,  $J$  = 8.4 Hz, 2H), 6.59 (d,  $J$  = 7.6 Hz, 1H), 4.81 – 4.59 (m, 1H), 4.42 (d,  $J$  = 10.8 Hz, 1H), 3.59 (d,  $J$  = 15.8 Hz, 1H), 3.00 (d,  $J$  = 8.4 Hz, 1H), 2.86 (d,  $J$  = 15.8 Hz, 1H), 2.65 (s, 3H), 2.54 (s, 3H) ppm.  $^{13}\text{C}\{^1\text{H}\}$  NMR (100 MHz,  $\text{CDCl}_3$ )  $\delta$  181.2, 176.5, 150.1, 143.9, 141.5, 138.5, 134.8, 134.2, 132.3, 131.8, 131.7, 129.9, 129.6, 129.5, 128.9, 127.4, 127.1, 125.8, 125.7, 123.1, 121.9, 108.3, 74.5, 70.4, 62.0 (q,  $^2J_{\text{C-F}}$  = 30.1 Hz), 48.7, 33.6, 25.8, 21.8 ppm. (the C of  $\text{CF}_3$  is not scanned).  $^{19}\text{F}$  NMR (376 MHz,  $\text{CDCl}_3$ )  $\delta$  -74.20 ppm. HRMS (ESI-TOF)  $m/z$   $[\text{M} + \text{H}]^+$  calcd for  $\text{C}_{34}\text{H}_{28}\text{BrF}_4\text{N}_3\text{O}_3\text{S}^+$  694.0981, found 694.0983.

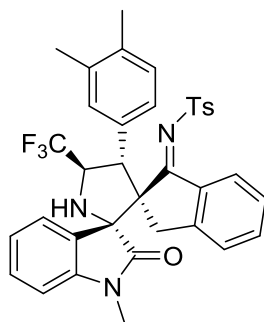

**(E)-N-(4'-(3,4-dimethylphenyl)-1''-methyl-2''-oxo-5'-(trifluoromethyl)dispiro[indene-2,3'-pyrrolidine-2',3''-indolin]-1(3H)-ylidene)-4-methylbenzenesulfonamide (6f)**

White solid: 57 mg (yield 90%);  $R_f$  (ethyl acetate : petroleum ether = 1:5) = 0.37; mp 176-178 °C; IR (KBr) 3337, 1707, 1615, 1321, 1155, 752, 679, 559  $\text{cm}^{-1}$ ;  $^1\text{H}$  NMR (400 MHz,  $\text{CDCl}_3$ )  $\delta$  8.13 (d,  $J$  = 8.0 Hz, 1H), 7.88 (d,  $J$  = 8.2 Hz, 2H), 7.52 (d,  $J$  = 7.4 Hz, 1H), 7.45 (d,  $J$  = 8.2 Hz, 2H), 7.43 – 7.37 (m, 1H), 7.32 (m, 1H), 7.28 (d,  $J$  = 7.8 Hz, 1H), 7.21 – 7.11 (m, 2H), 6.97 (d,  $J$  = 7.8 Hz, 1H), 6.86 (d,  $J$  = 7.8 Hz, 1H), 6.80 (s, 1H), 6.61 (d,  $J$  = 7.8 Hz, 1H), 4.81 – 4.63 (m, 1H), 4.43 (d,  $J$  = 11.2 Hz, 1H), 3.71 (d,  $J$  = 15.6 Hz, 1H), 3.05 (d,  $J$  = 8.3 Hz, 1H), 3.00 (d,  $J$  = 15.6 Hz, 1H), 2.58 (s, 3H), 2.54 (s, 3H), 2.16 (s, 3H), 2.08 (s, 3H) ppm.  $^{13}\text{C}\{^1\text{H}\}$  NMR (100 MHz,  $\text{CDCl}_3$ )  $\delta$  176.4, 150.6, 143.7, 141.3, 138.7, 136.6, 136.1, 134.6, 132.4, 131.9, 131.6, 129.7, 129.6, 129.5, 129.3, 127.2, 127.1, 125.9, 123.0, 108.4, 74.6, 71.0, 62.1 (q,  $^2J_{\text{C-F}}$  = 30.5 Hz), 48.4, 33.0, 25.8, 21.7, 19.8, 19.3 ppm. (the C of  $\text{CF}_3$  is not scanned).  $^{19}\text{F}$  NMR (376 MHz,  $\text{CDCl}_3$ )  $\delta$  -74.07 ppm. HRMS (ESI-TOF)  $m/z$   $[\text{M} + \text{Na}]^+$  calcd for  $\text{C}_{36}\text{H}_{32}\text{F}_3\text{N}_3\text{O}_3\text{SNa}^+$  666.2009, found 666.2013.

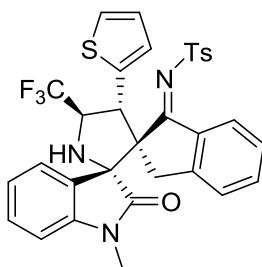

**(E)-4-methyl-N-(1''-methyl-2''-oxo-4'-(thiophen-2-yl)-5'-(trifluoromethyl)dispiro[indene-2,3'-pyrrolidine-2',3''-indolin]-1(3H)-ylidene)benzenesulfonamide (6g)**

White solid: 49 mg (yield 79%);  $R_f$  (ethyl acetate : petroleum ether = 1:5) = 0.37; mp 203-205 °C; IR (KBr) 3325, 1704, 1615, 1326, 1156, 771, 694, 560  $\text{cm}^{-1}$ ;  $^1\text{H}$  NMR (400 MHz,  $\text{CDCl}_3$ )  $\delta$  8.24 (d,  $J$  = 8.0 Hz, 1H), 7.87 (d,  $J$  = 8.4 Hz, 2H), 7.45 (d,  $J$  = 7.4 Hz, 4H), 7.36 – 7.28 (m, 2H), 7.23 (t,  $J$  = 7.8 Hz, 1H), 7.19 – 7.15 (m, 1H), 7.09 – 7.02 (m, 1H), 6.93 – 6.86 (m, 1H), 6.83 (d,  $J$  = 3.6 Hz, 1H), 6.64 (d,  $J$  = 7.8 Hz, 1H), 4.73 (d,  $J$  = 10.8 Hz, 1H), 4.67 – 4.55 (m, 1H), 3.73 (d,  $J$  = 16.0 Hz, 1H), 3.14 (d,  $J$  = 9.0 Hz, 1H), 2.98 (d,  $J$  = 16.0 Hz, 1H), 2.59 (s, 3H), 2.51 (s, 3H) ppm.  $^{13}\text{C}\{^1\text{H}\}$  NMR (100 MHz,  $\text{CDCl}_3$ )  $\delta$  180.2, 175.8, 150.7, 143.7, 141.3, 138.4, 137.6, 134.9, 132.4, 129.7, 129.5, 129.4, 129.3, 127.4, 127.3, 127.2, 126.7, 126.1, 125.9, 123.0, 108.5, 74.1, 70.7, 63.0 (q,  $^2J_{\text{C-F}}$  = 29.7 Hz), 44.6, 32.6, 25.9, 21.7 ppm. (the C of  $\text{CF}_3$  is not scanned).  $^{19}\text{F}$  NMR (376 MHz,  $\text{CDCl}_3$ )  $\delta$  -73.81 ppm. HRMS (ESI-TOF)  $m/z$   $[\text{M} + \text{H}]^+$  calcd for  $\text{C}_{32}\text{H}_{27}\text{F}_3\text{N}_3\text{O}_3\text{S}_2^+$  622.1440, found 622.1443.



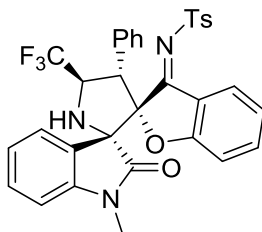

**(*E*)-4-methyl-*N*-(1''-methyl-2''-oxo-4'-phenyl-5'-(trifluoromethyl)-3*H*-dispiro[benzofuran-2,3'-pyrrolidine-2',3''-indolin]-3-ylidene)benzenesulfonamide (6h)**

White solid: 32 mg (yield 52%);  $R_f$  (ethyl acetate : petroleum ether = 1:5) = 0.5; mp 198-200 °C; IR (KBr) 1709, 1616, 1462, 1370, 1089, 701, 662, 556  $\text{cm}^{-1}$ ;  $^1\text{H}$  NMR (400 MHz,  $\text{CDCl}_3$ )  $\delta$  8.20 (d,  $J$  = 8.0 Hz, 1H), 7.67 (d,  $J$  = 8.2 Hz, 2H), 7.54 – 7.45 (m, 1H), 7.39 (d,  $J$  = 7.8 Hz, 3H), 7.25 – 7.15 (m, 6H), 7.05 (d,  $J$  = 8.4 Hz, 1H), 6.95 (t,  $J$  = 7.6 Hz, 1H), 6.79 (t,  $J$  = 7.4 Hz, 1H), 6.71 (d,  $J$  = 7.8 Hz, 1H), 5.05 – 4.84 (m, 1H), 4.22 (d,  $J$  = 10.8 Hz, 1H), 3.33 (d,  $J$  = 9.2 Hz, 1H), 2.90 (s, 3H), 2.53 (s, 3H) ppm.  $^{13}\text{C}\{^1\text{H}\}$  NMR (100 MHz,  $\text{CDCl}_3$ )  $\delta$  174.0, 173.1, 168.1, 143.7, 142.4, 138.8, 137.9, 130.9, 130.1, 129.8, 129.5, 129.3, 128.5, 128.4, 127.3, 127.1, 126.4, 122.8, 122.6, 117.8, 112.6, 108.3, 99.4, 74.7, 62.3 (q,  $^2J_{\text{C-F}}$  = 30.0 Hz), 53.7, 26.7, 21.7 ppm (the C of  $\text{CF}_3$  is not observed).  $^{19}\text{F}$  NMR (376 MHz,  $\text{CDCl}_3$ )  $\delta$  -73.11 ppm. HRMS (ESI-TOF)  $m/z$   $[\text{M} + \text{H}]^+$  calcd for  $\text{C}_{33}\text{H}_{27}\text{F}_3\text{N}_3\text{O}_4\text{S}^+$  618.1669, found 618.1673.

## 8. NMR spectra of all new compounds

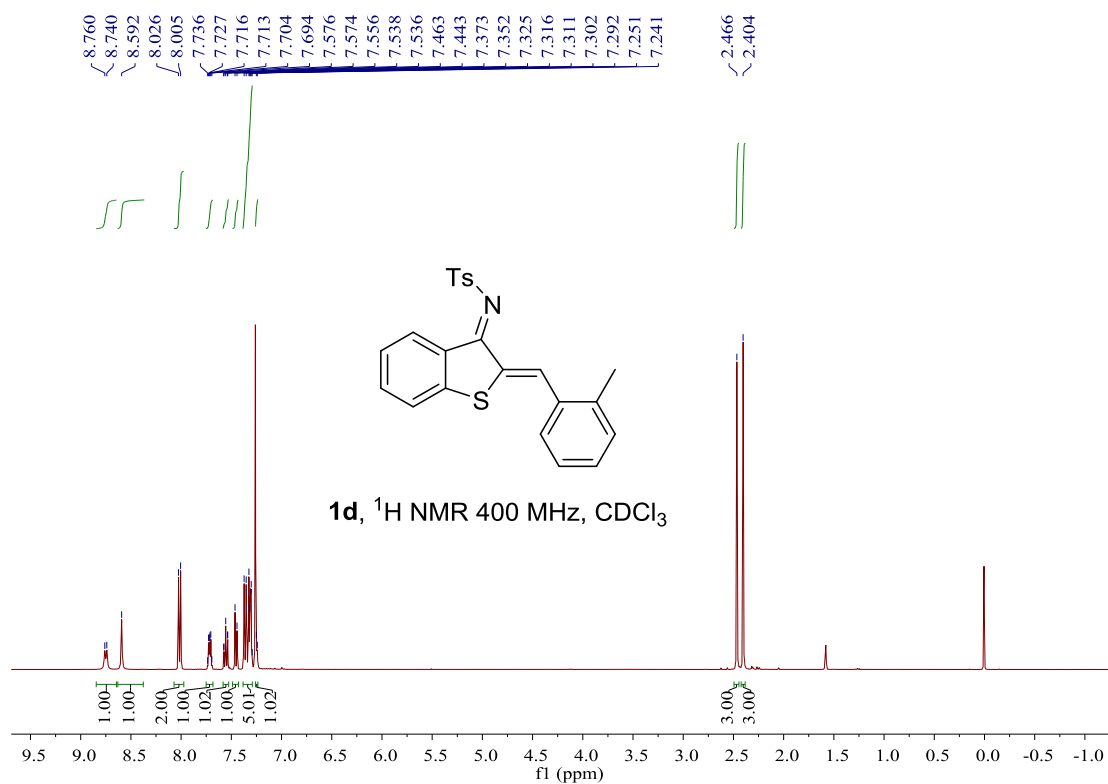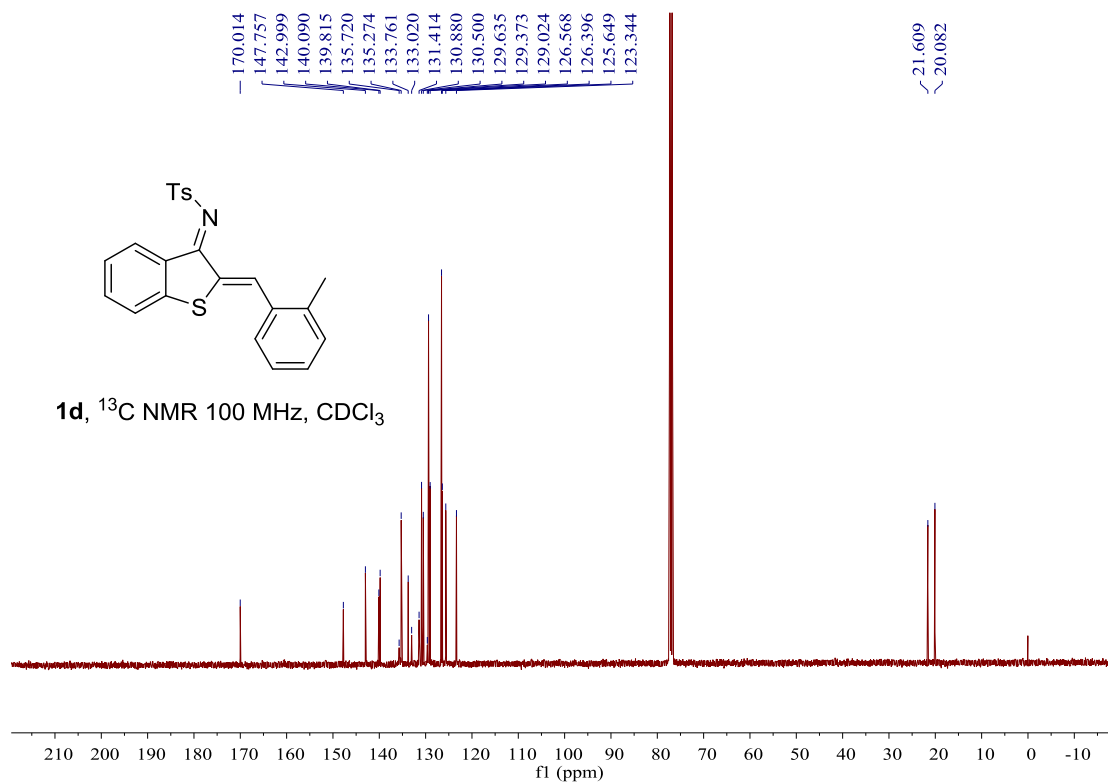

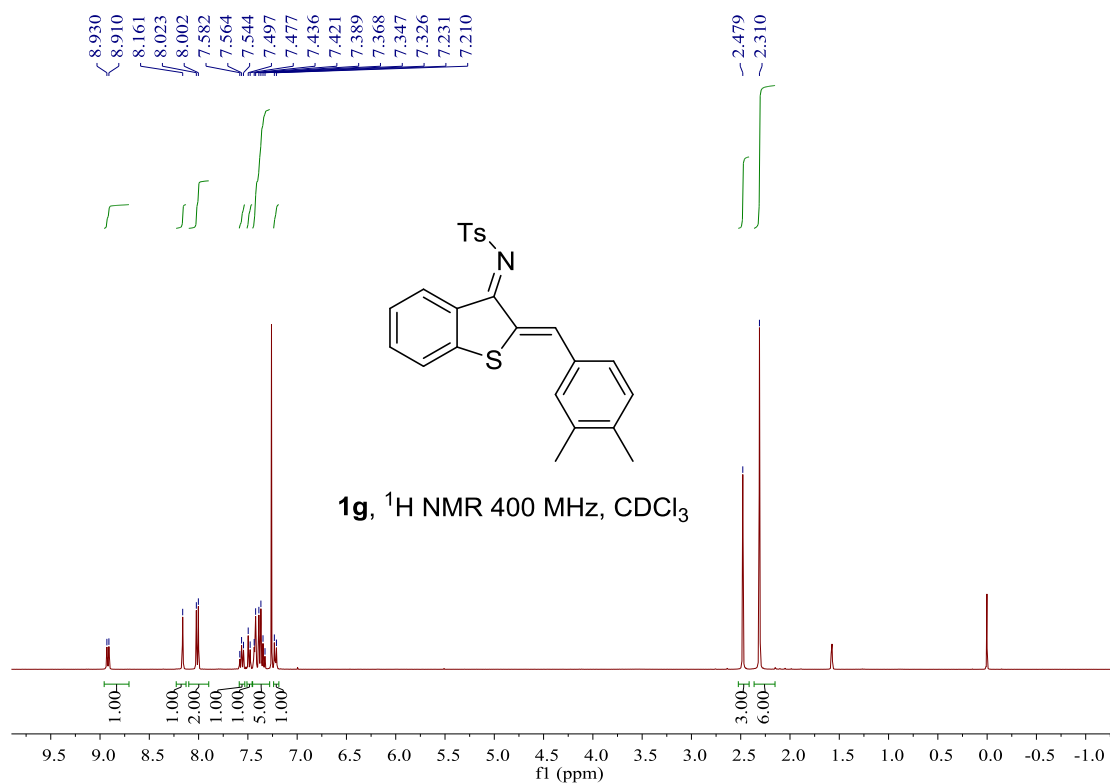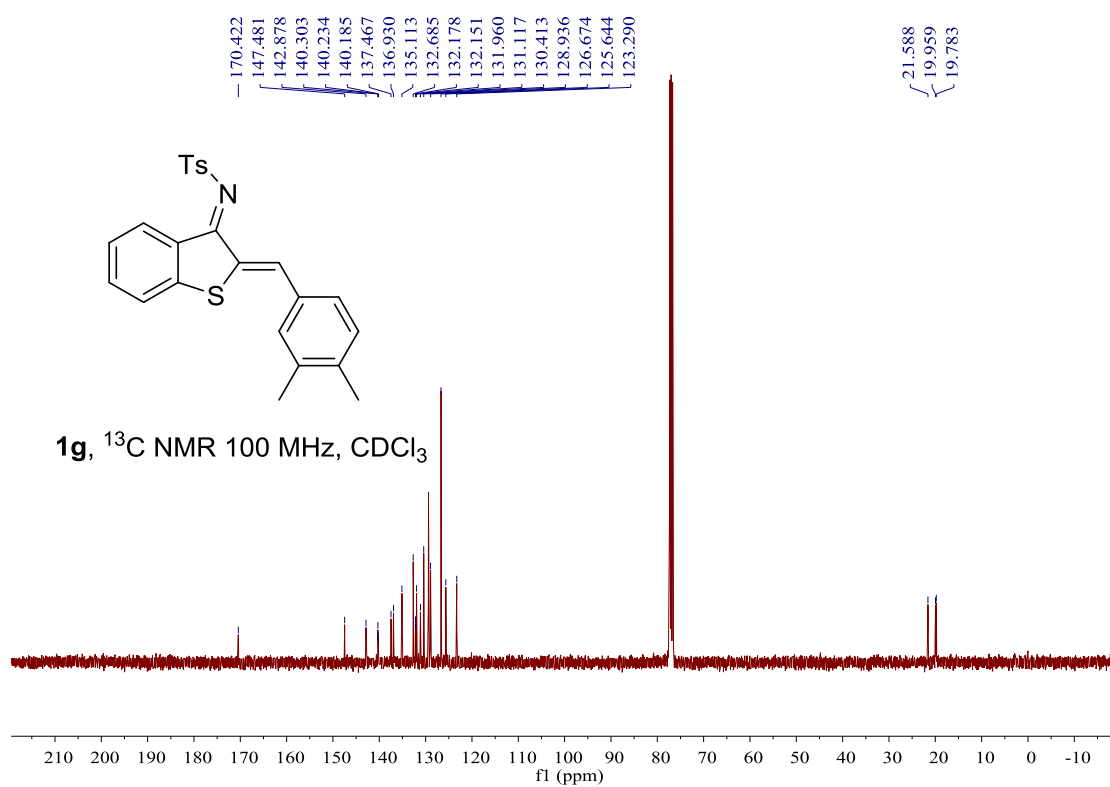

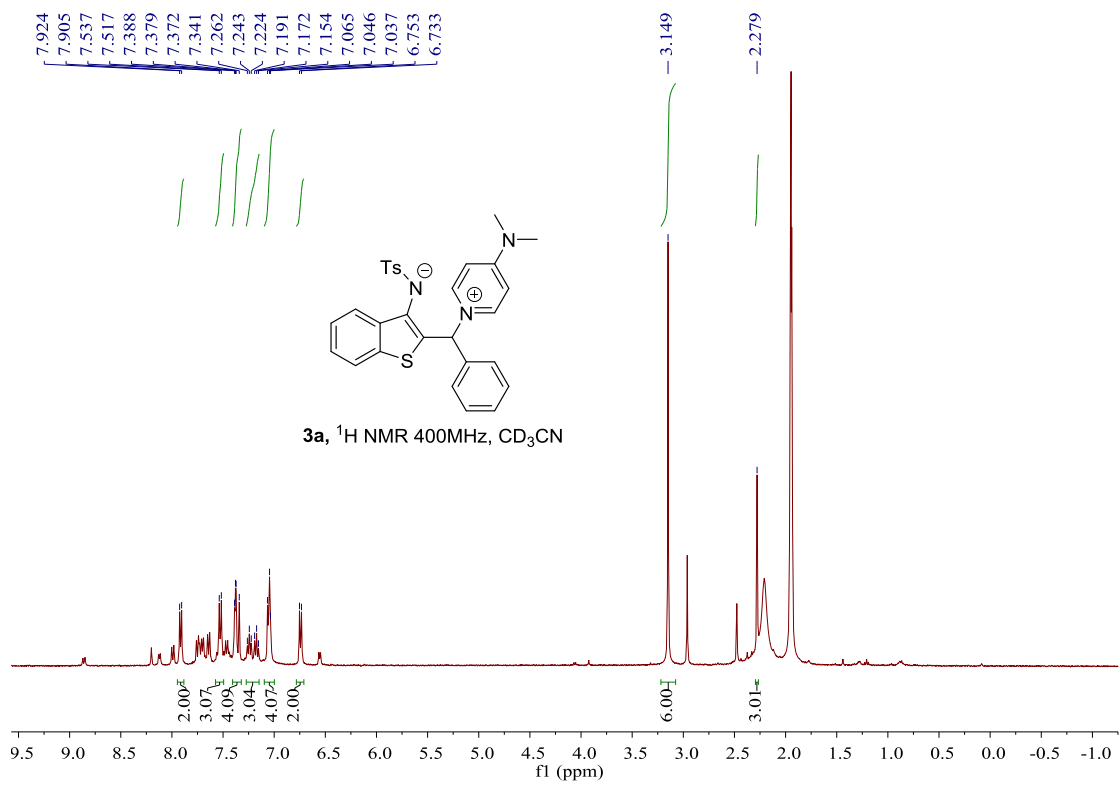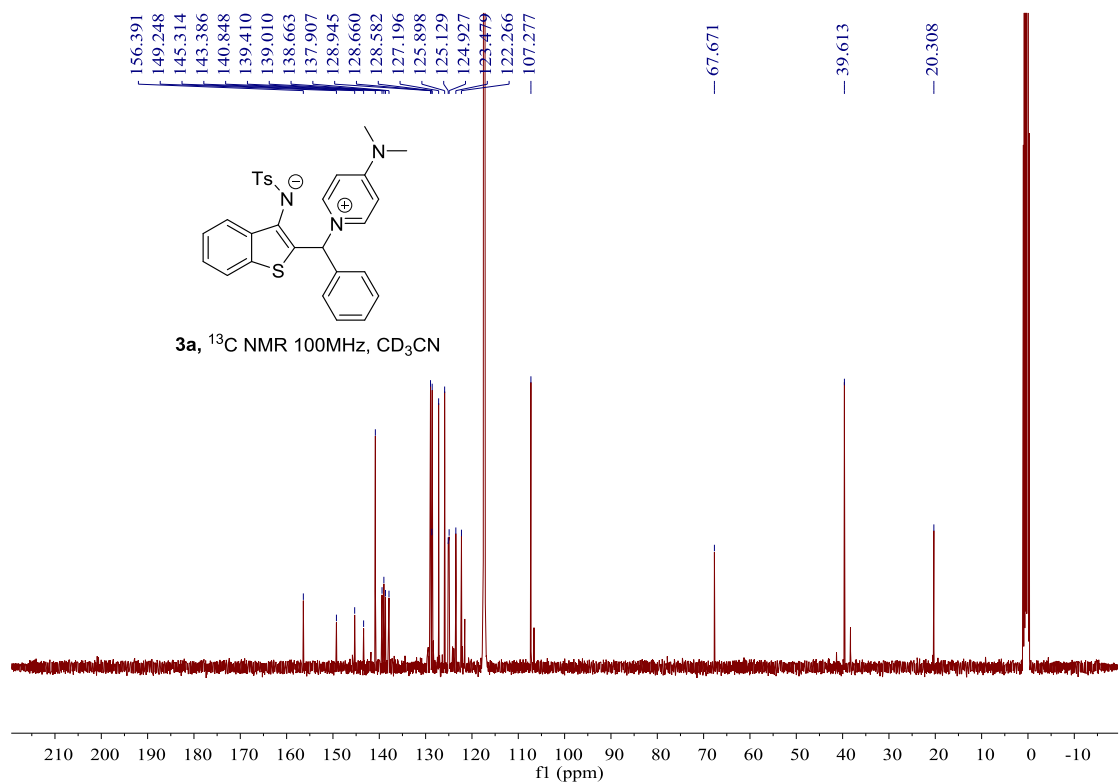

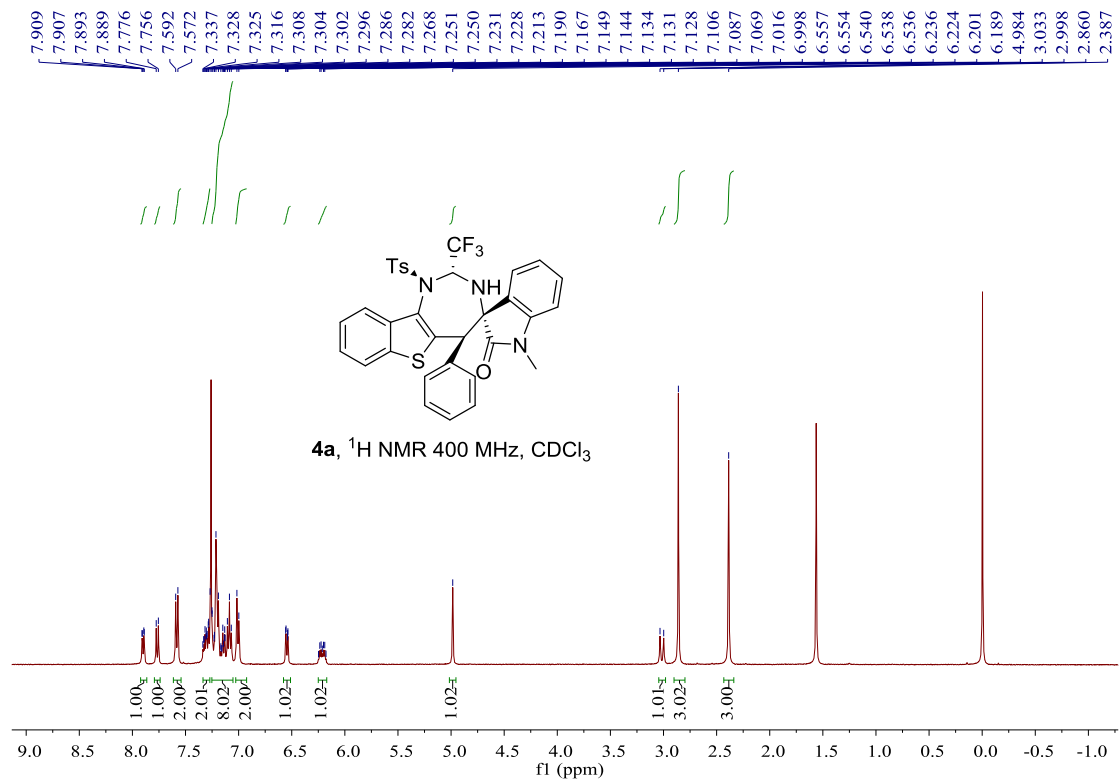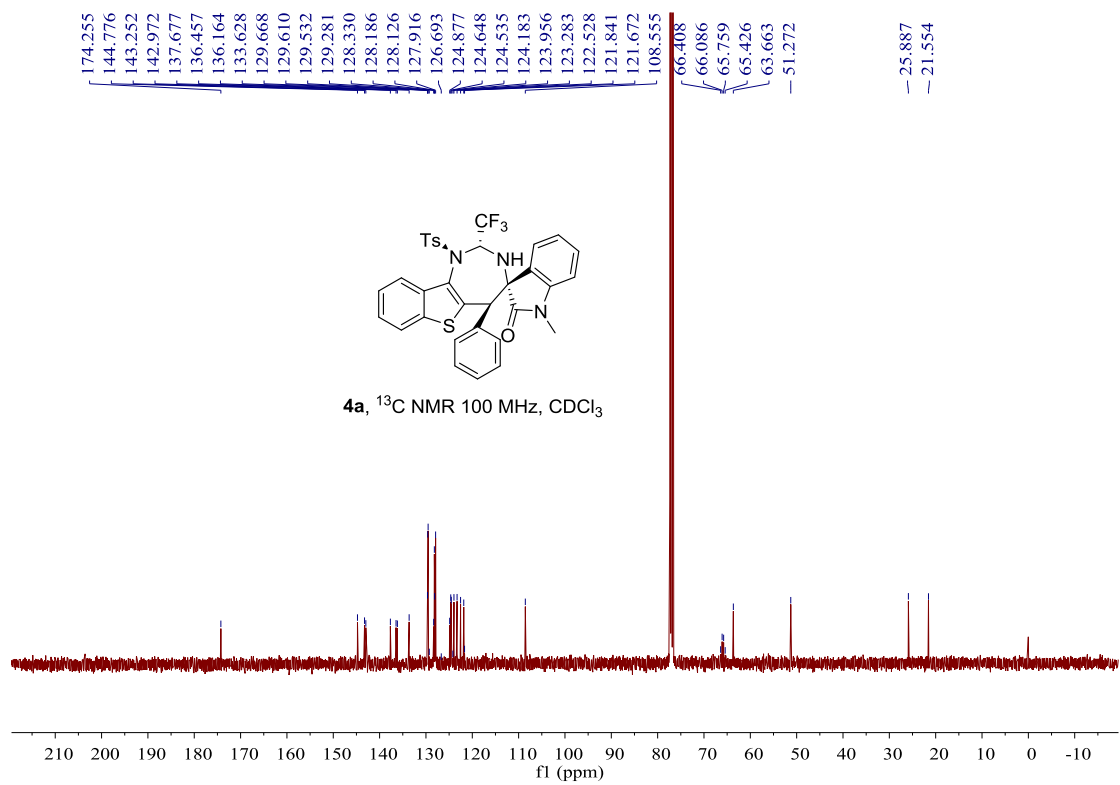

-- -78.054

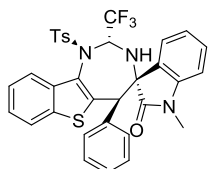

4a,  $^{19}\text{F}$  NMR 376 MHz,  $\text{CDCl}_3$

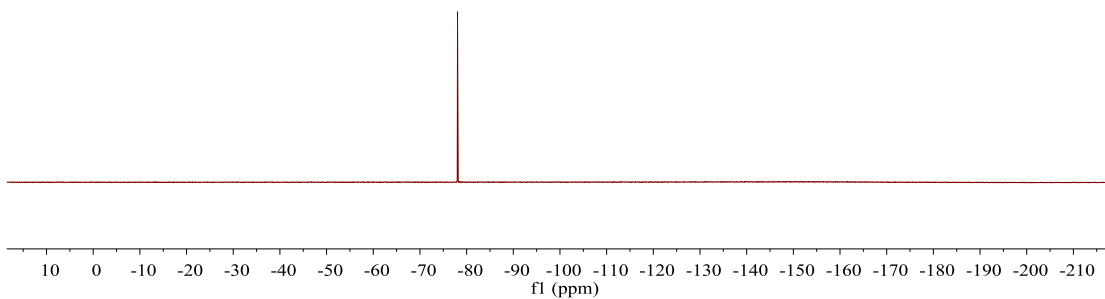

7.750  
7.730  
7.423  
7.403  
7.384  
7.364  
7.326  
7.307  
7.288  
7.260  
7.232  
7.214  
7.195  
7.140  
7.123  
7.110  
7.105  
7.092  
7.072  
7.065  
7.045  
6.989  
6.879  
6.868  
6.845  
6.834  
6.387  
6.369  
5.450  
2.995  
2.565

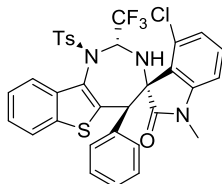

4b,  $^1\text{H}$  NMR 400 MHz,  $\text{CDCl}_3$

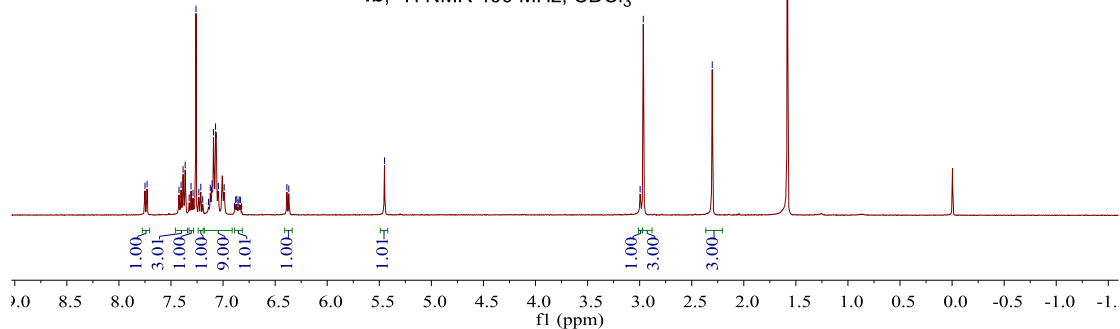

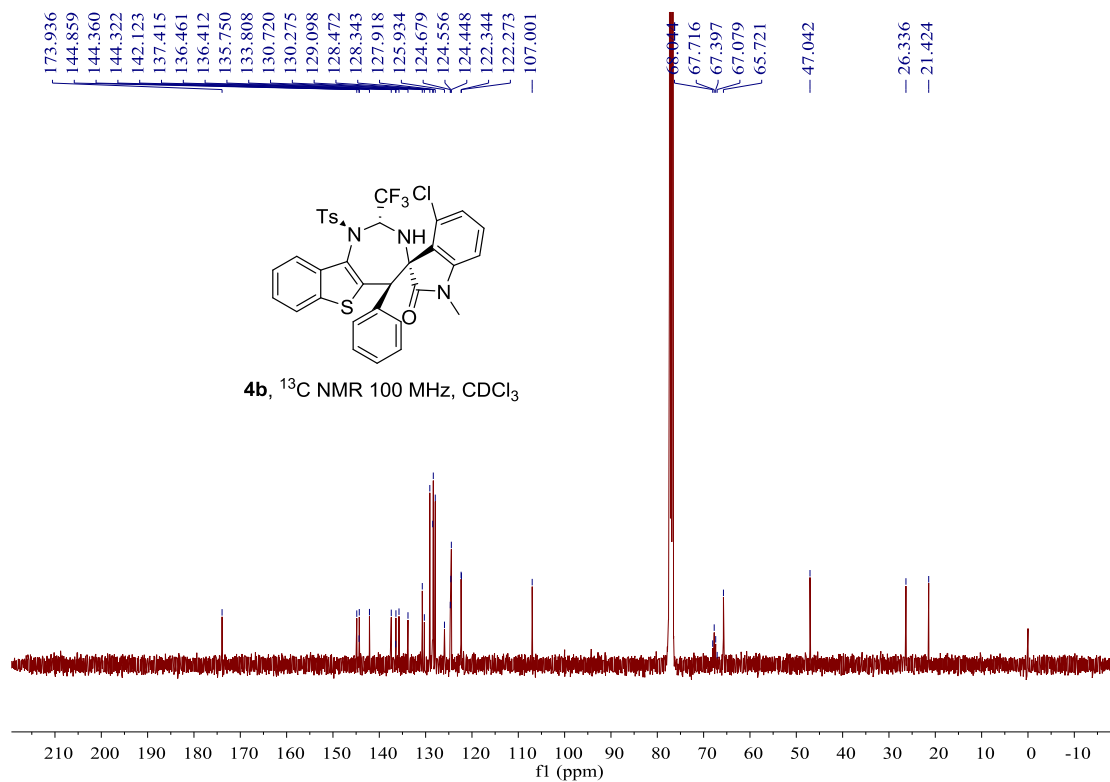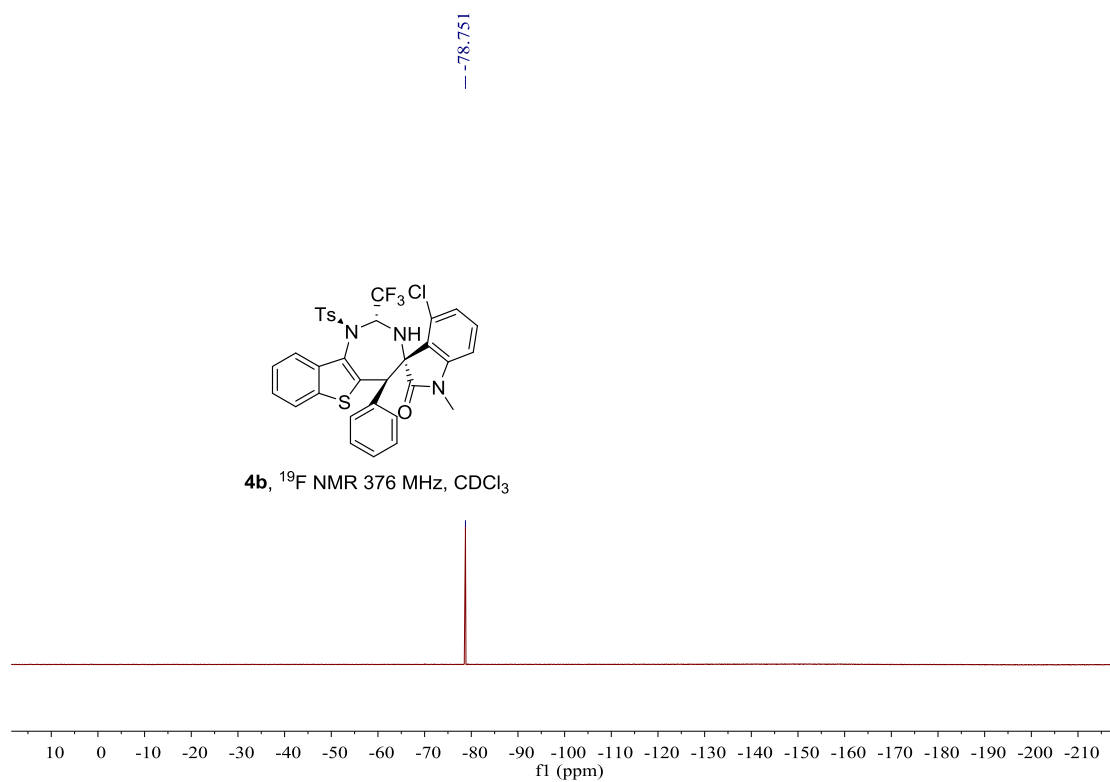

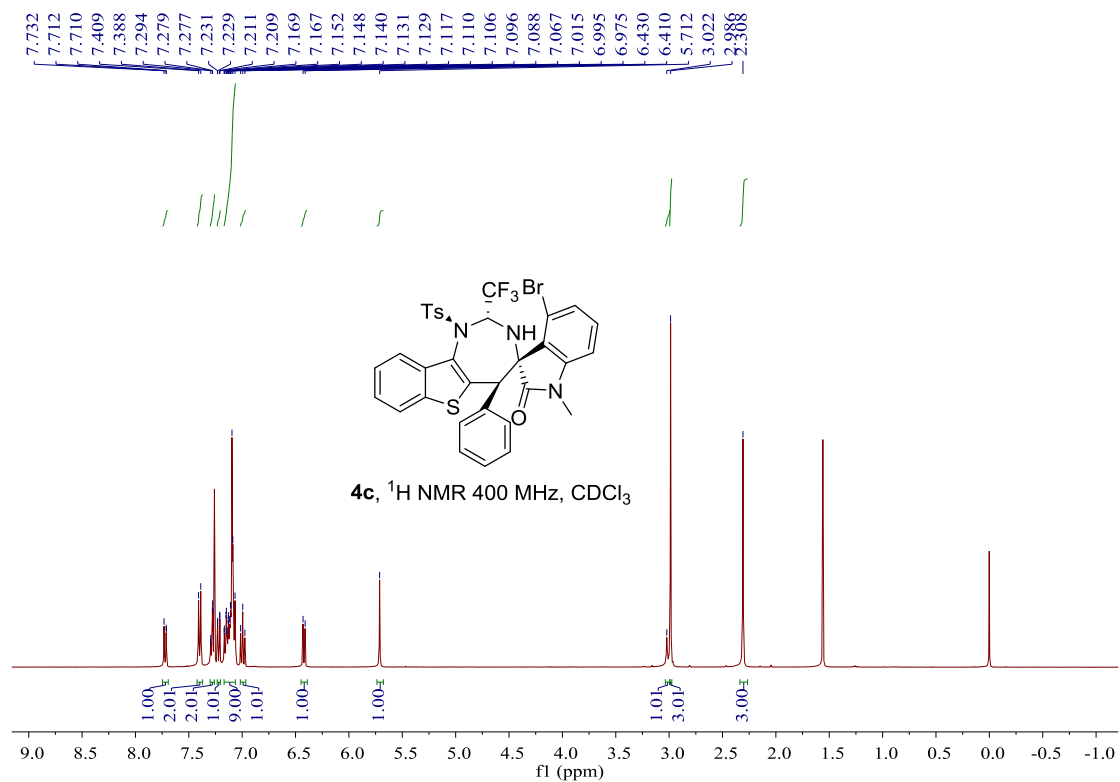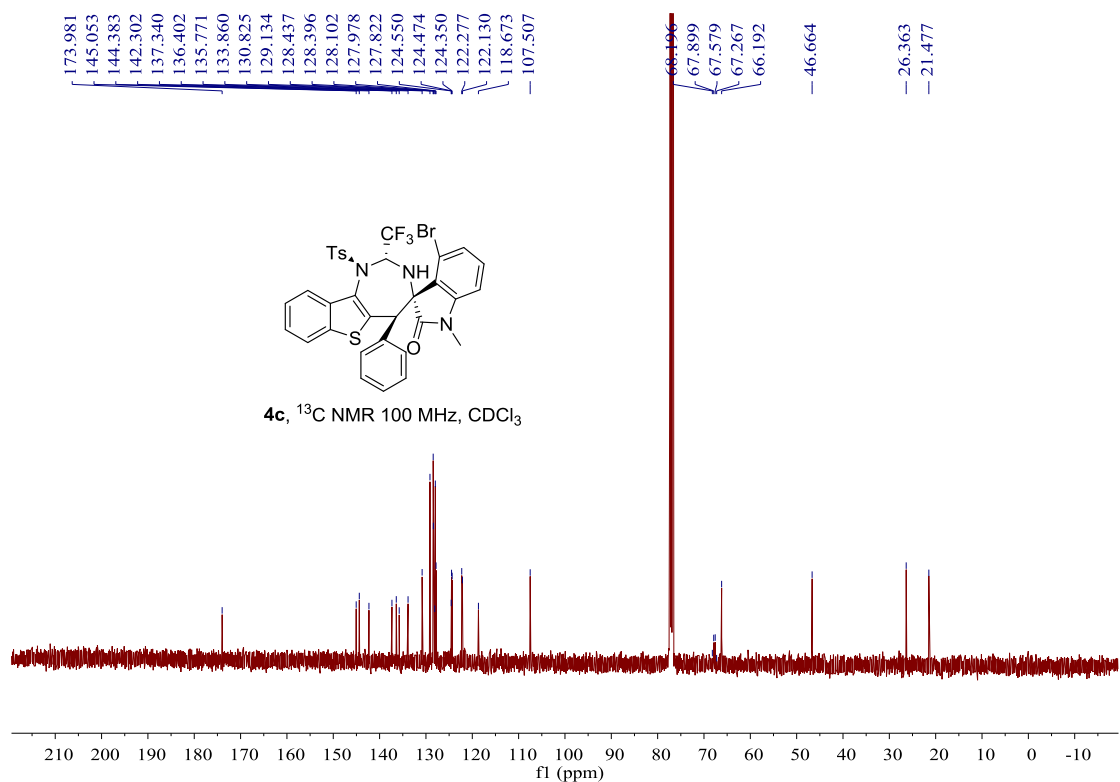



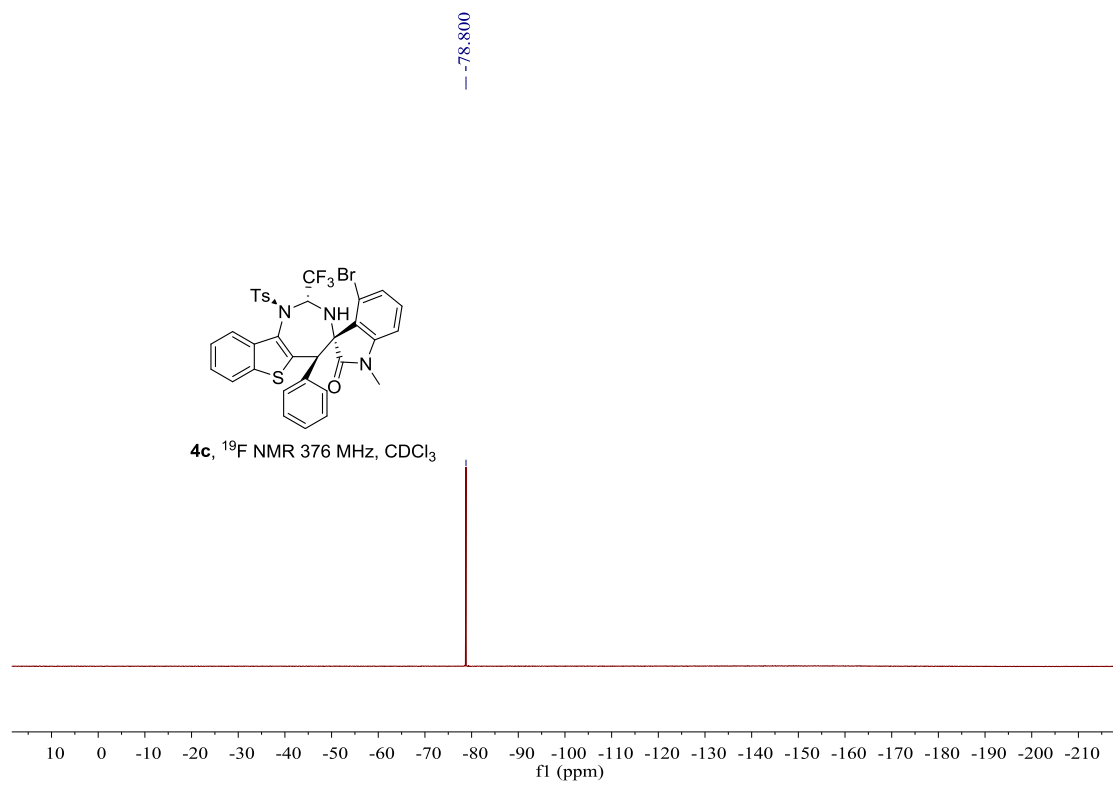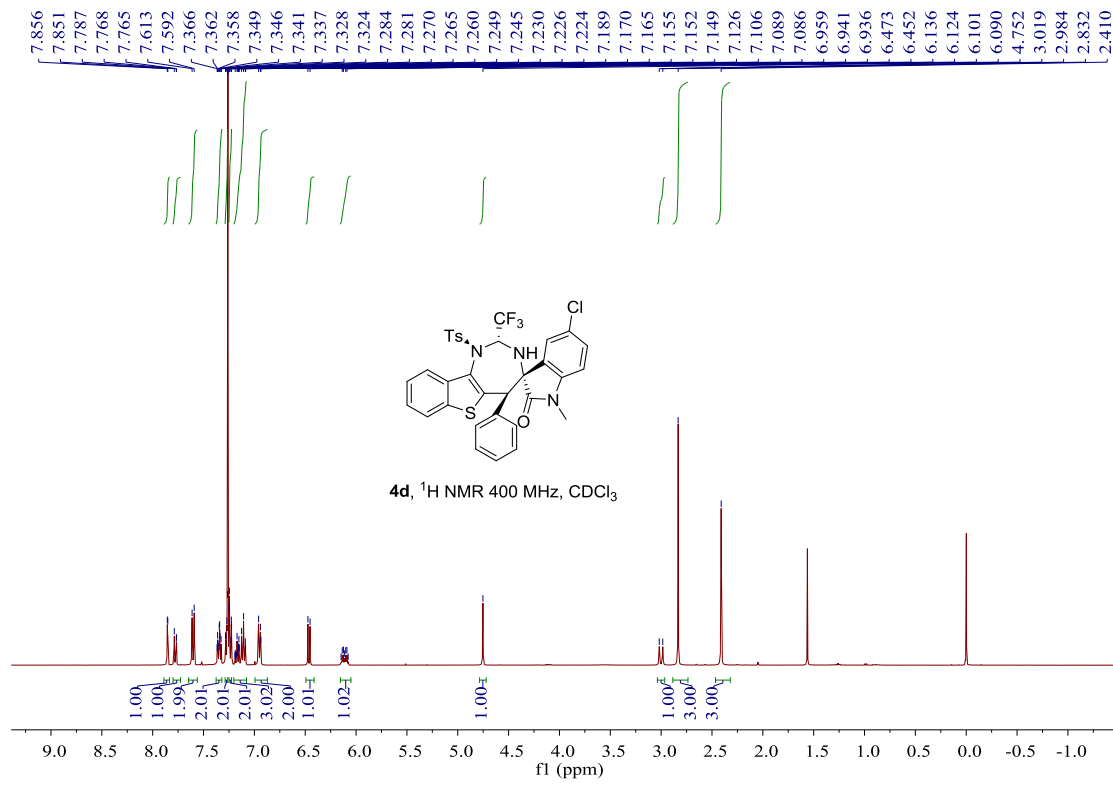

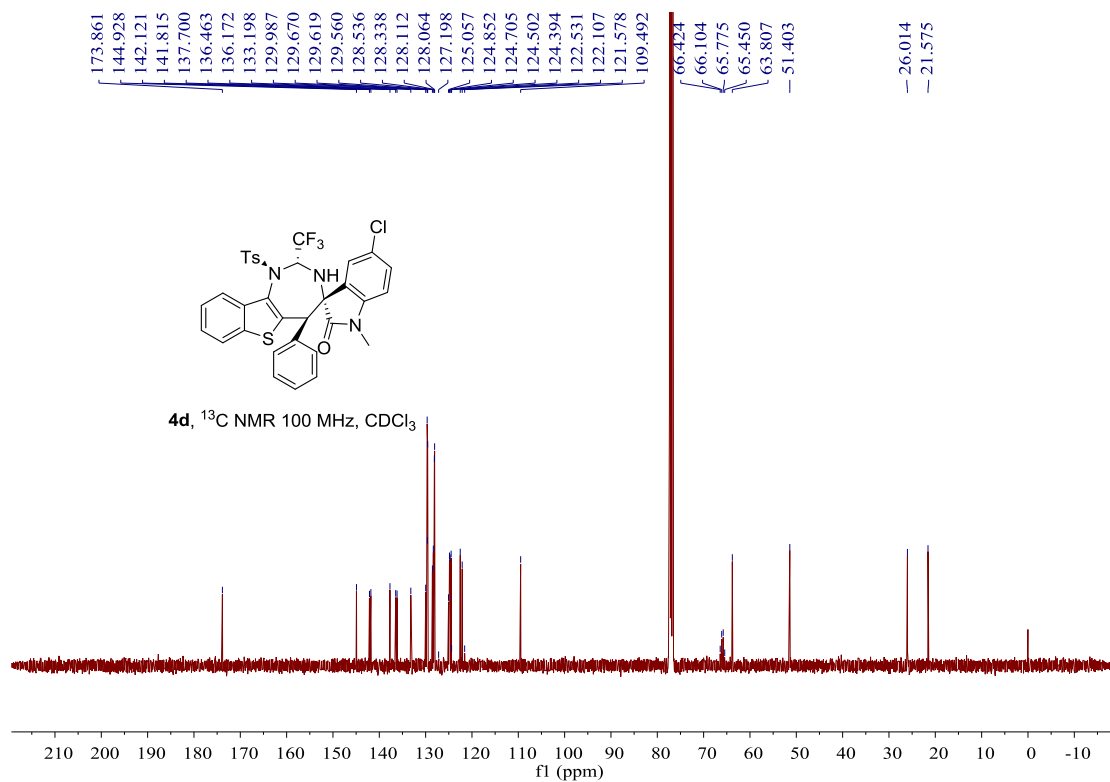

--77.916

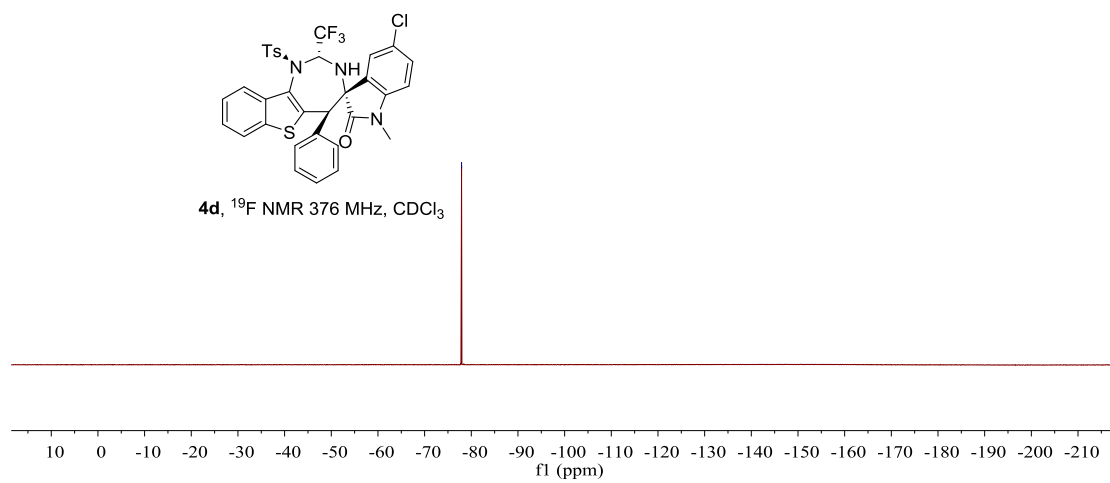

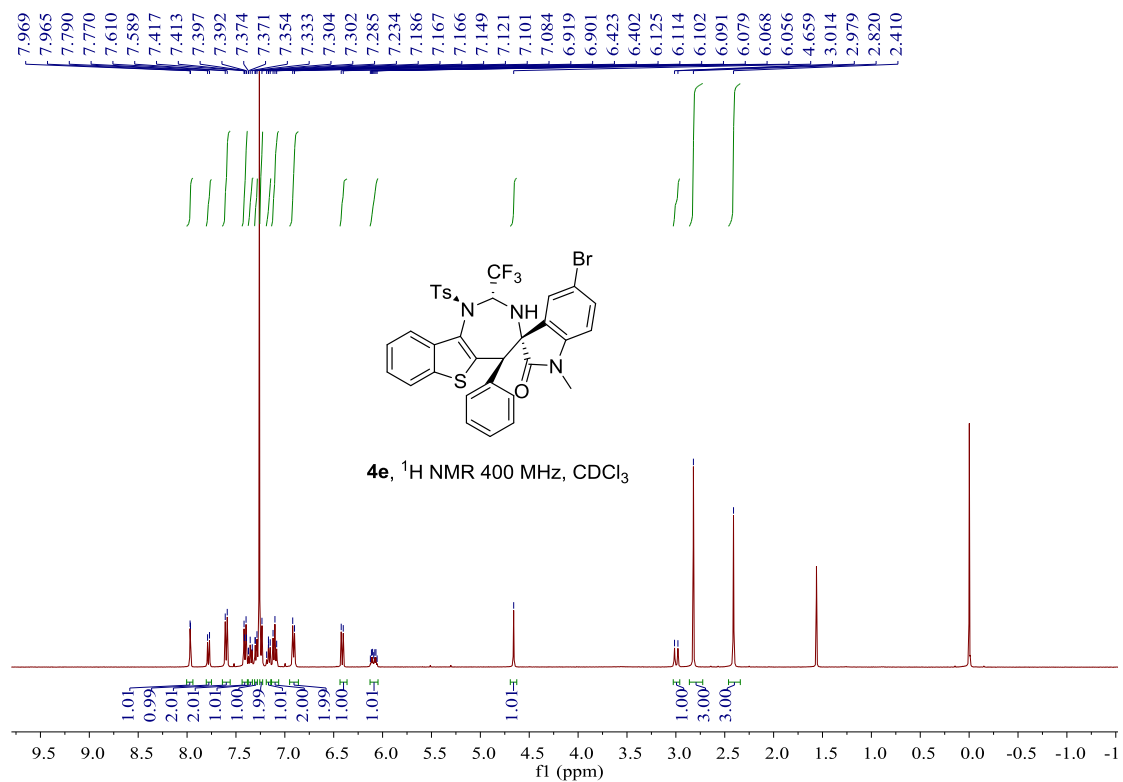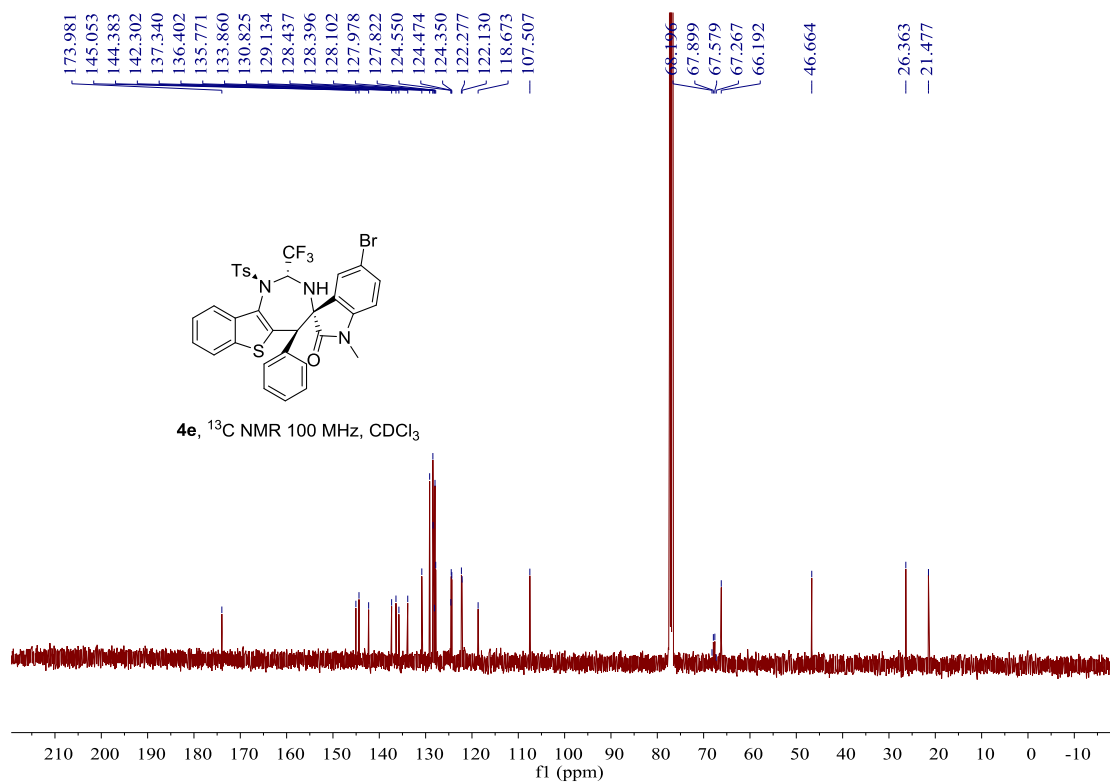

--77.892

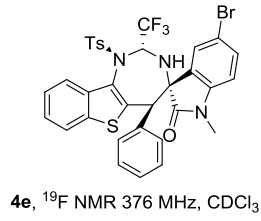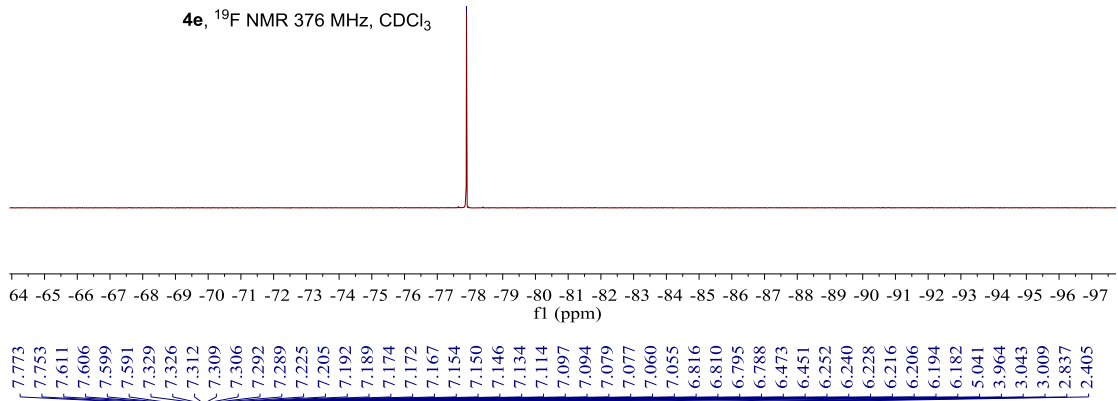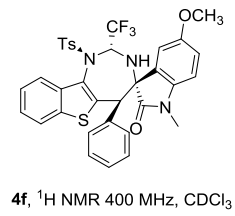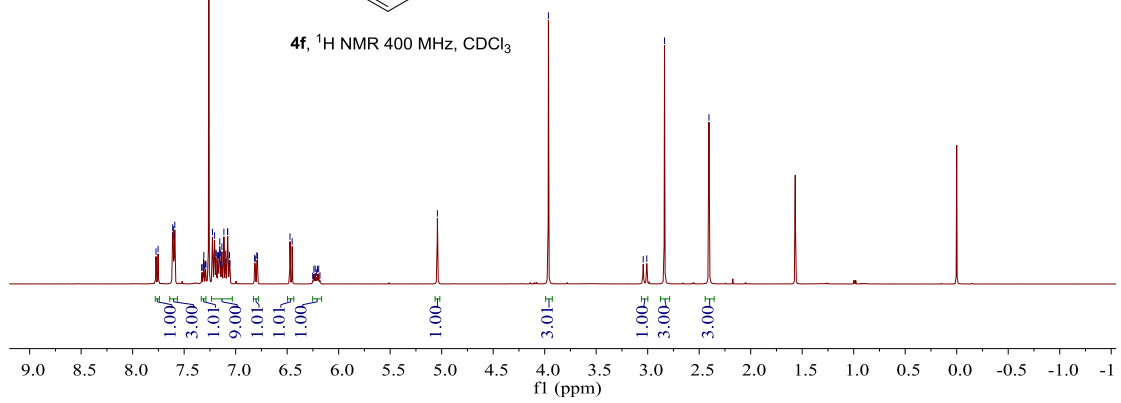

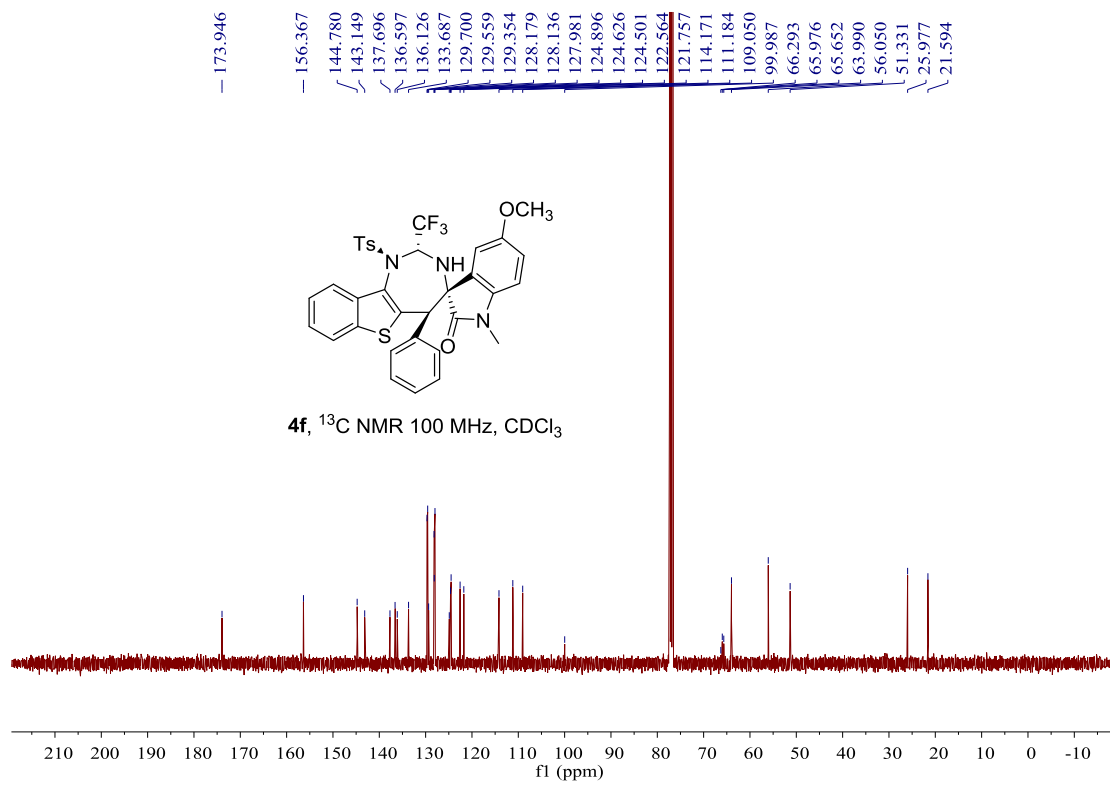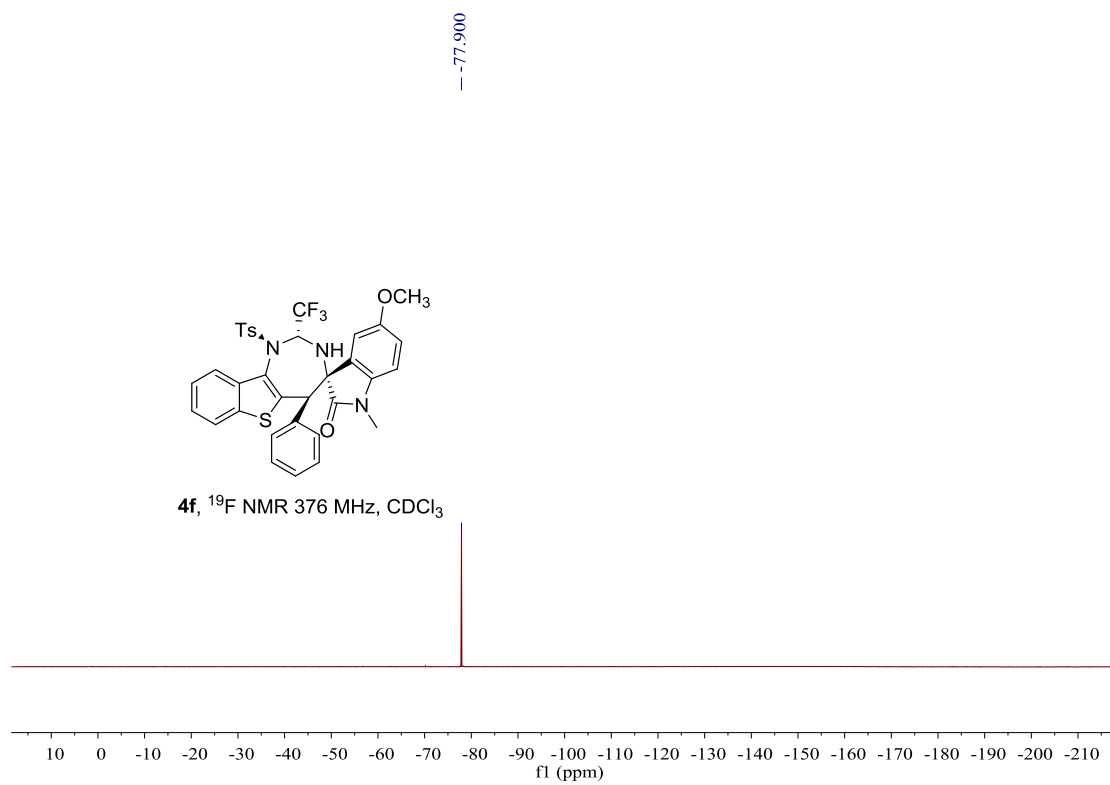

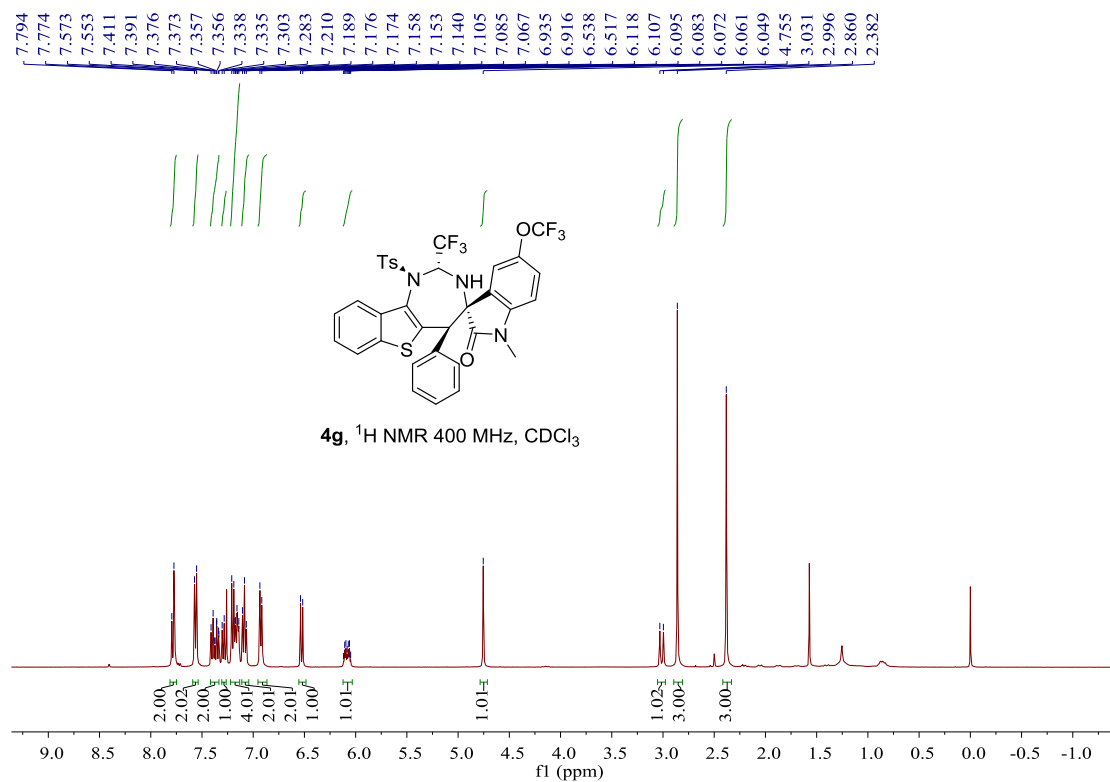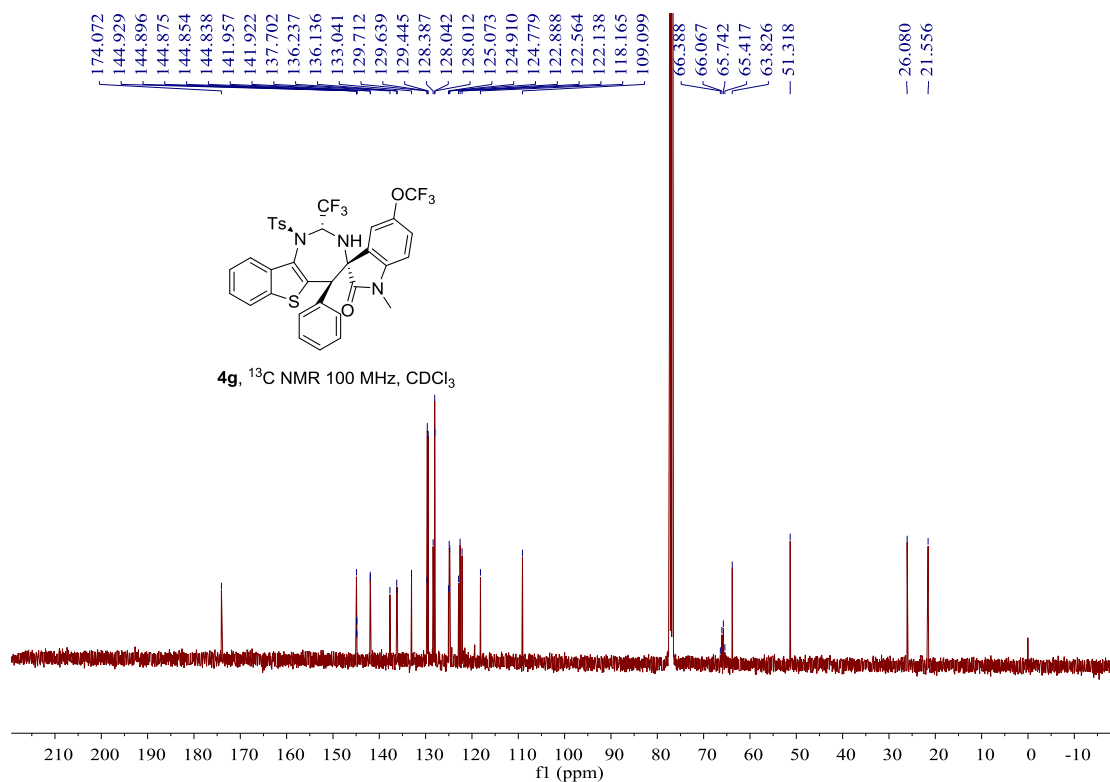

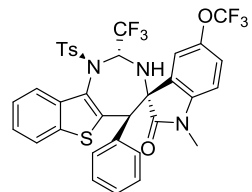

4g,  $^{19}\text{F}$  NMR 376 MHz,  $\text{CDCl}_3$

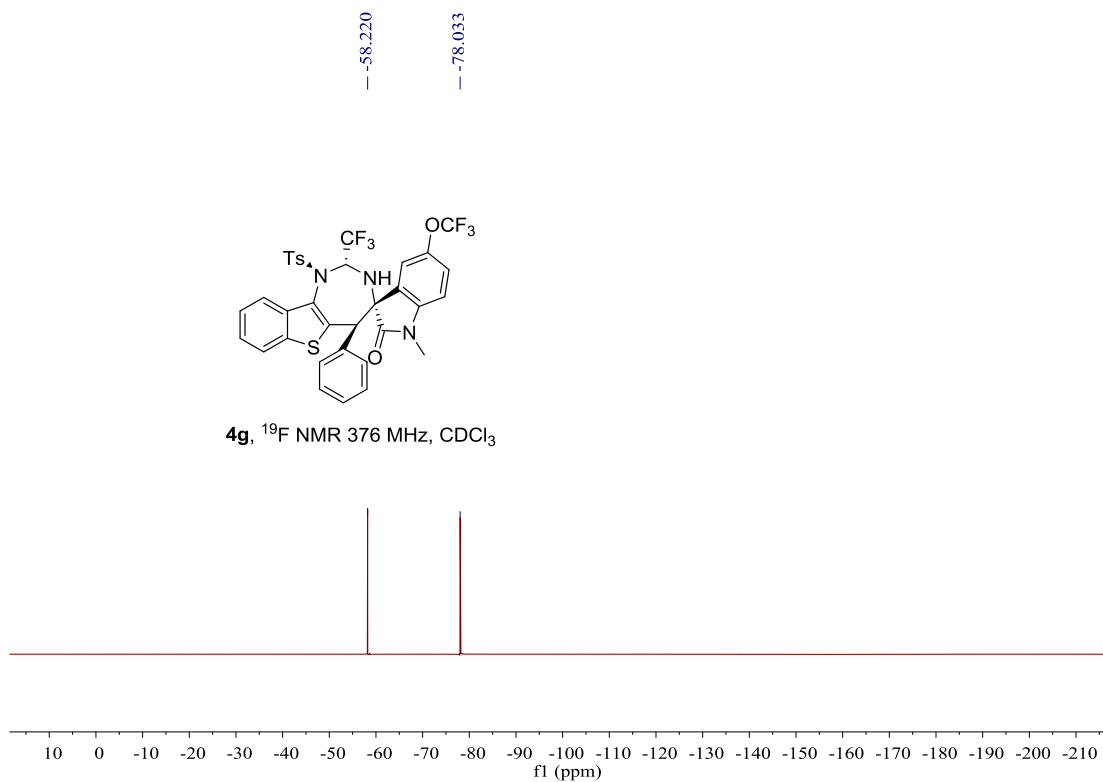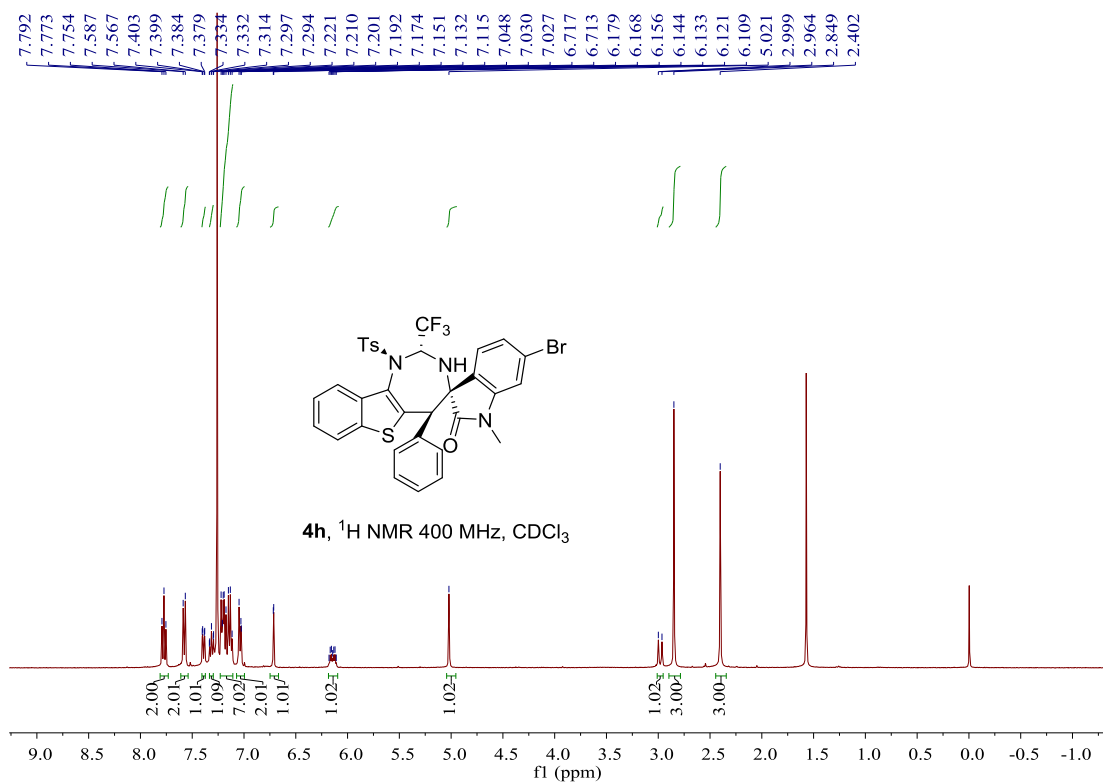

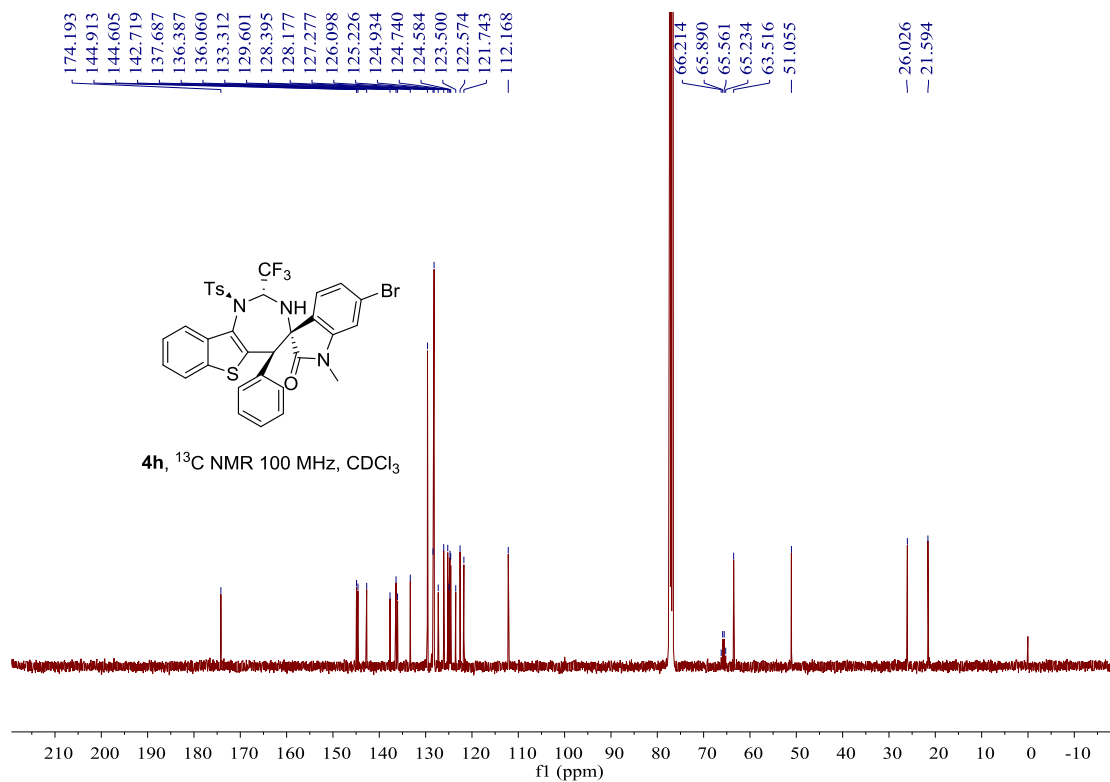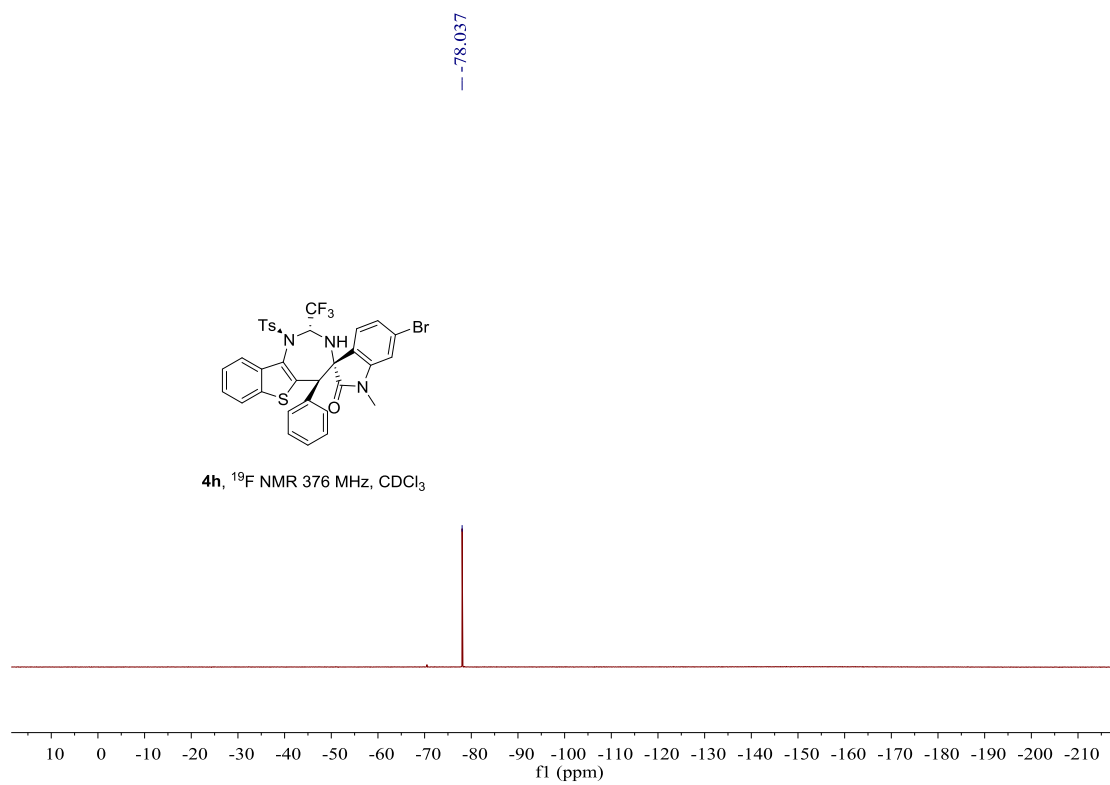



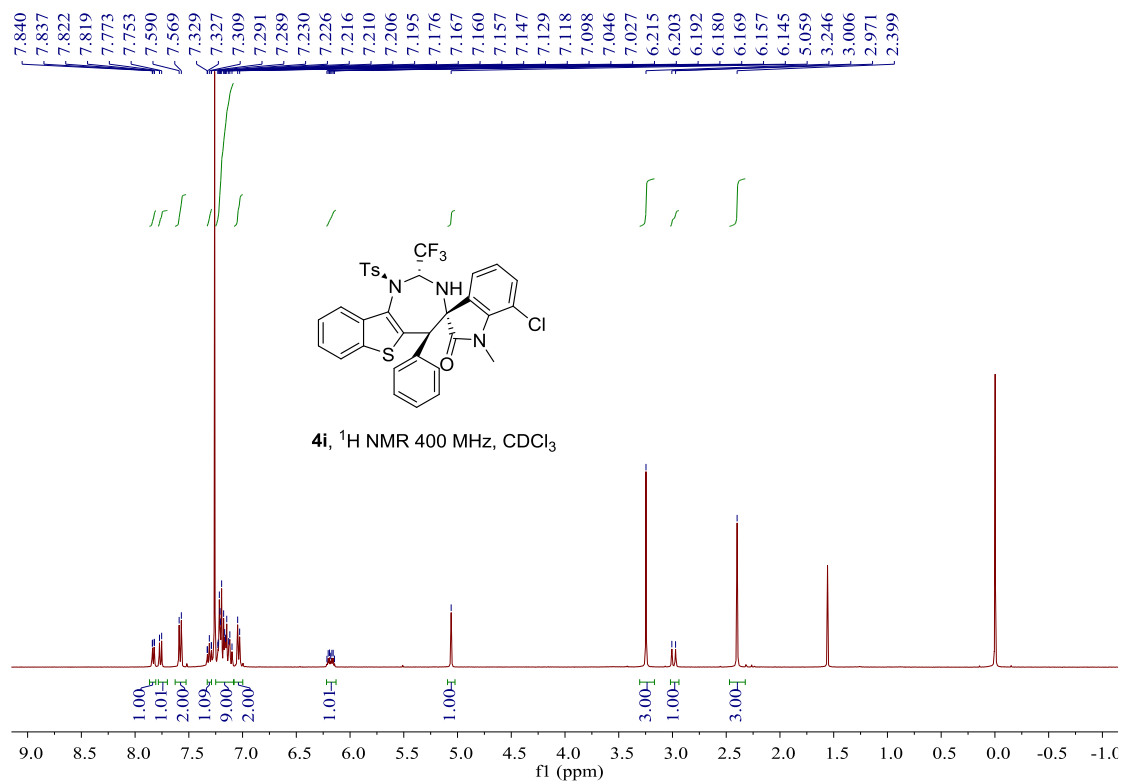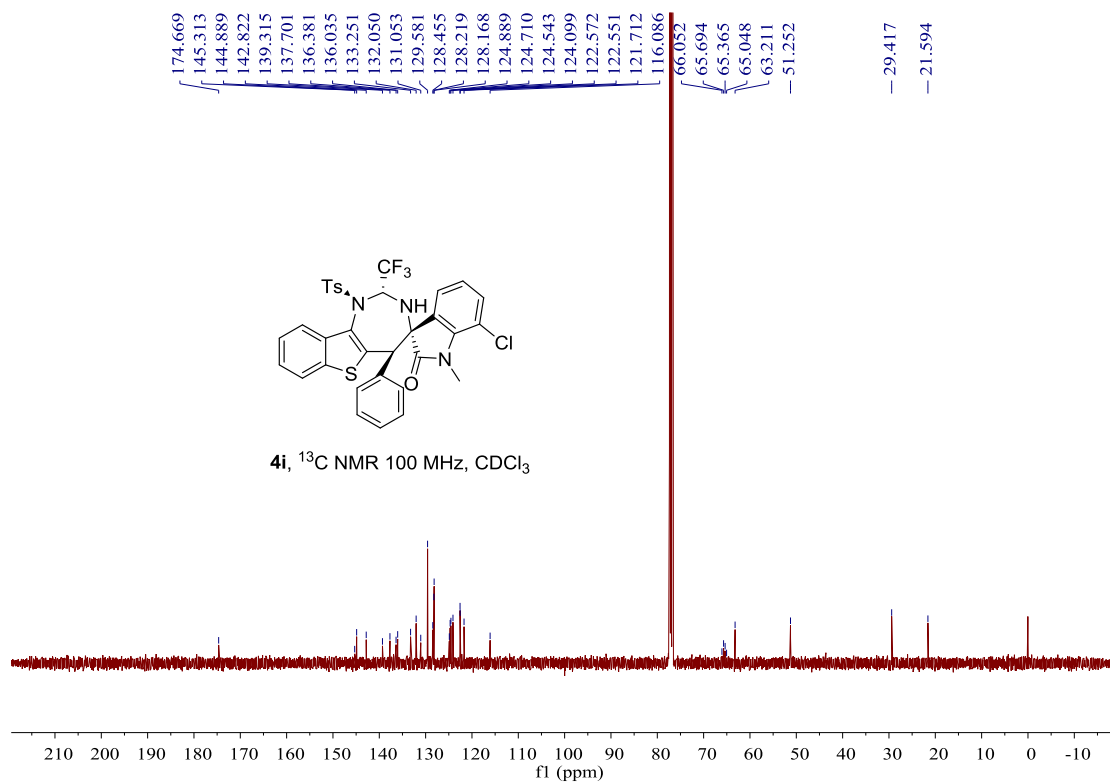

-78.050

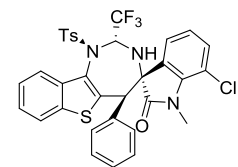

4i, <sup>19</sup>F NMR 376 MHz, CDCl<sub>3</sub>

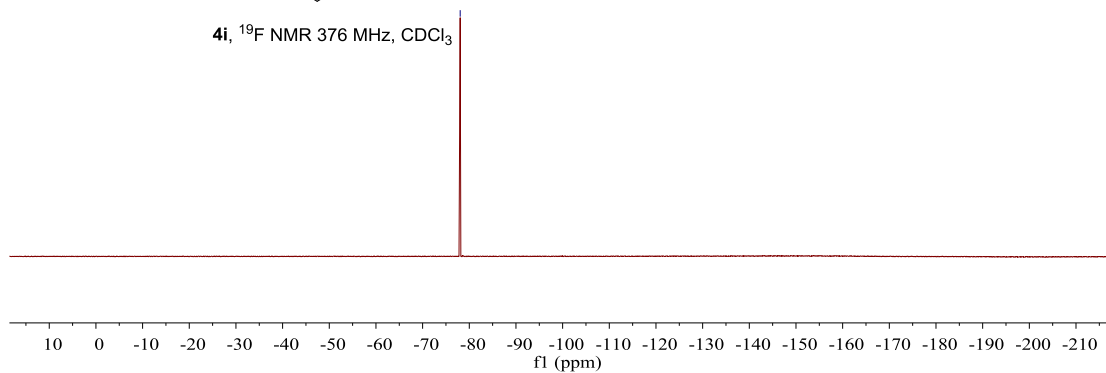

7.879  
7.862  
7.773  
7.753  
7.590  
7.570  
7.409  
7.389  
7.327  
7.309  
7.289  
7.237  
7.217  
7.196  
7.177  
7.167  
7.160  
7.148  
7.130  
7.118  
7.112  
7.098  
7.092  
7.042  
7.023  
6.205  
6.193  
6.171  
6.159  
5.058  
3.258  
3.008  
2.973

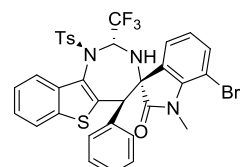

4j, <sup>1</sup>H NMR 400 MHz, CDCl<sub>3</sub>

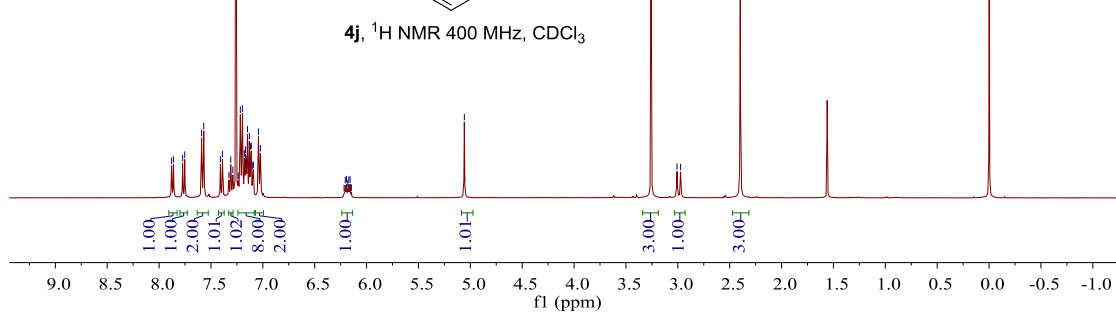

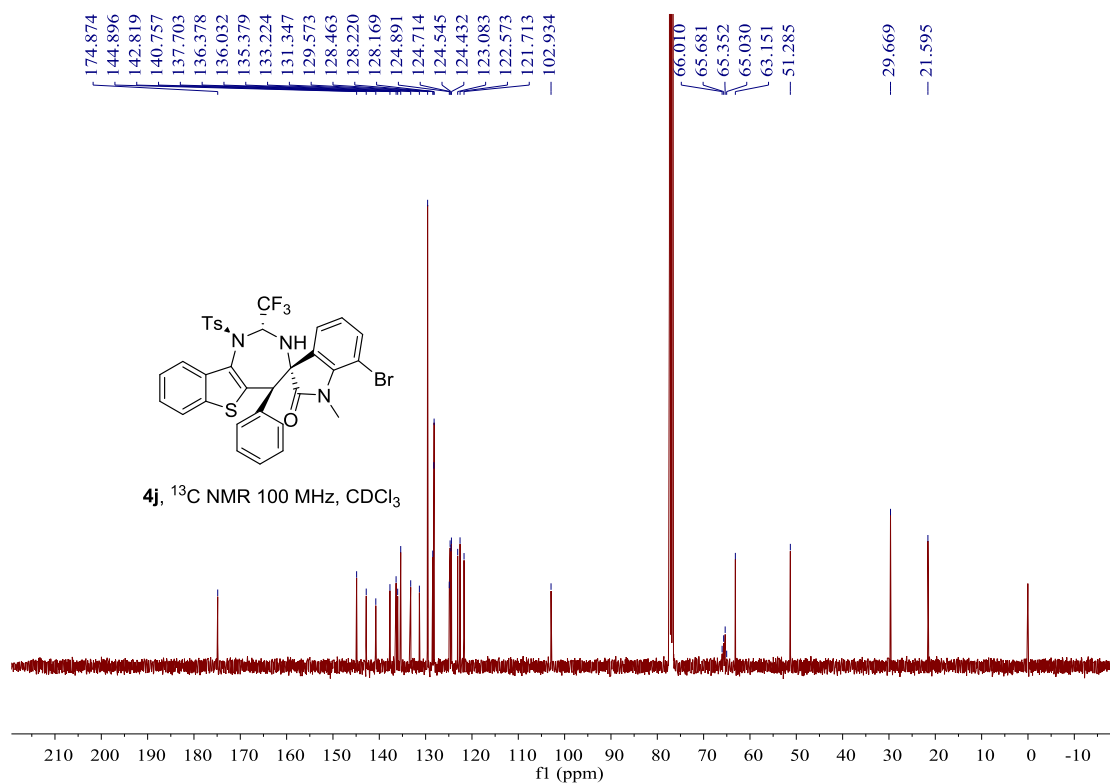

-78.045

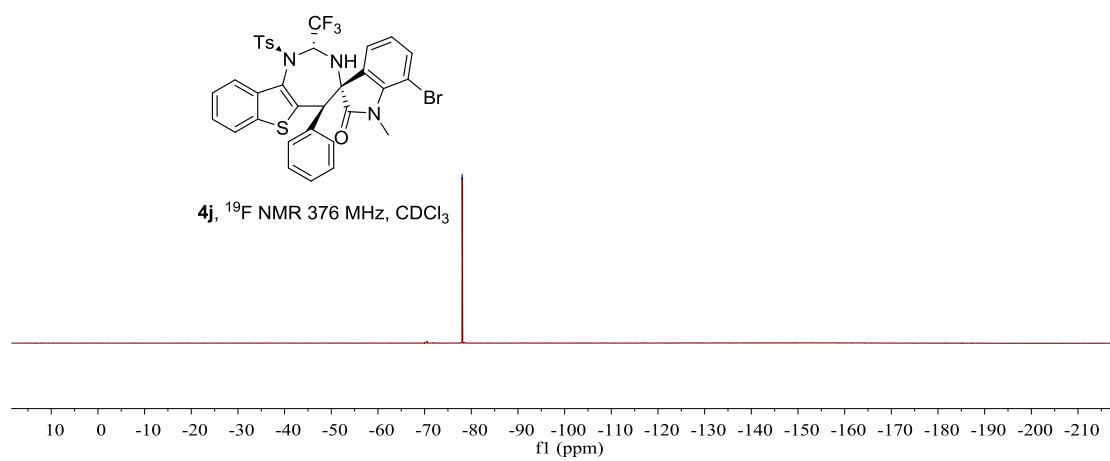

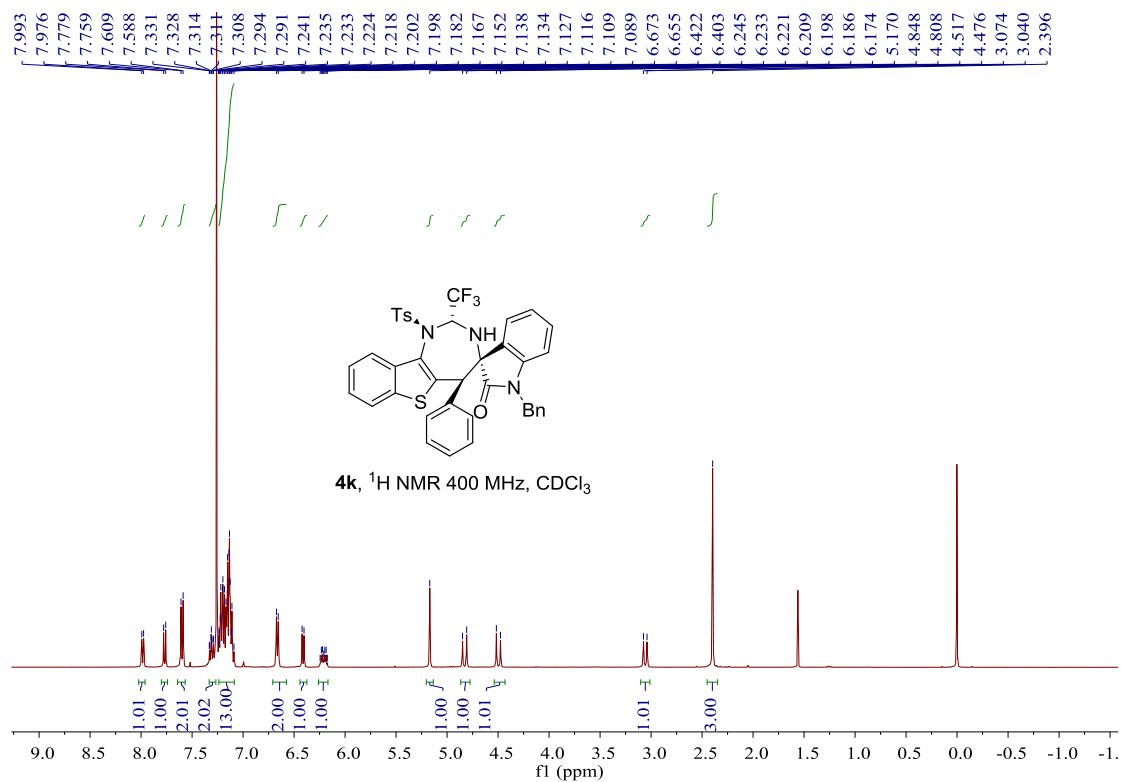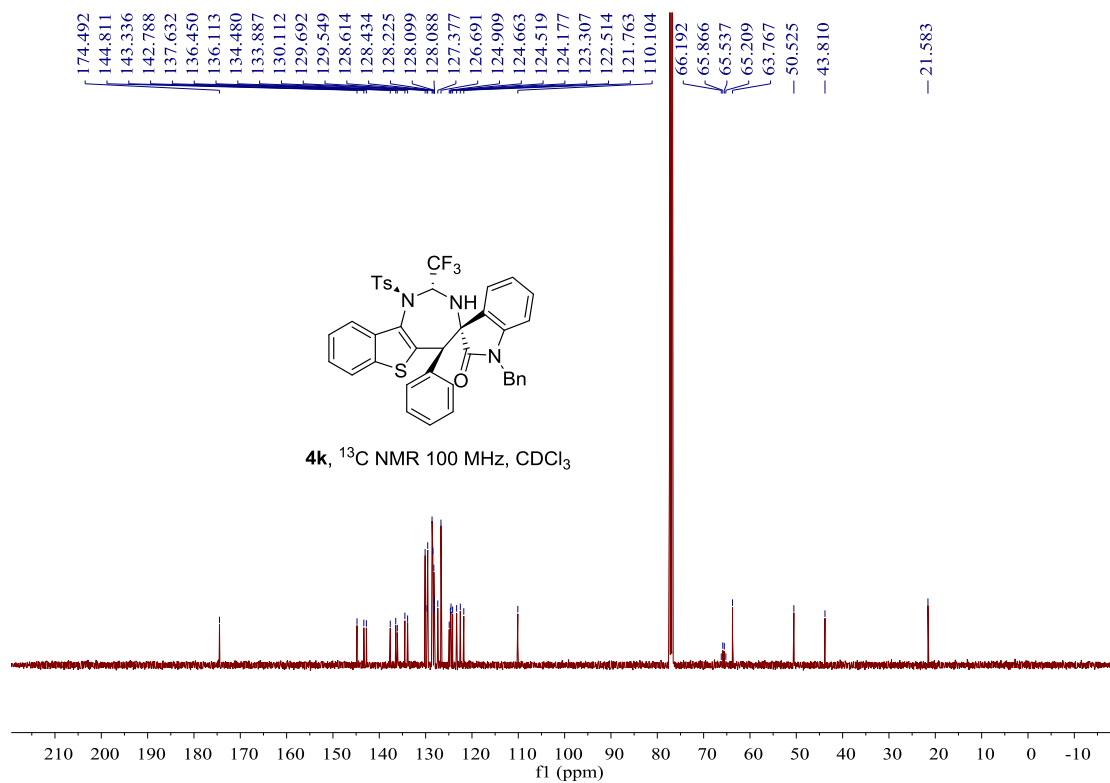

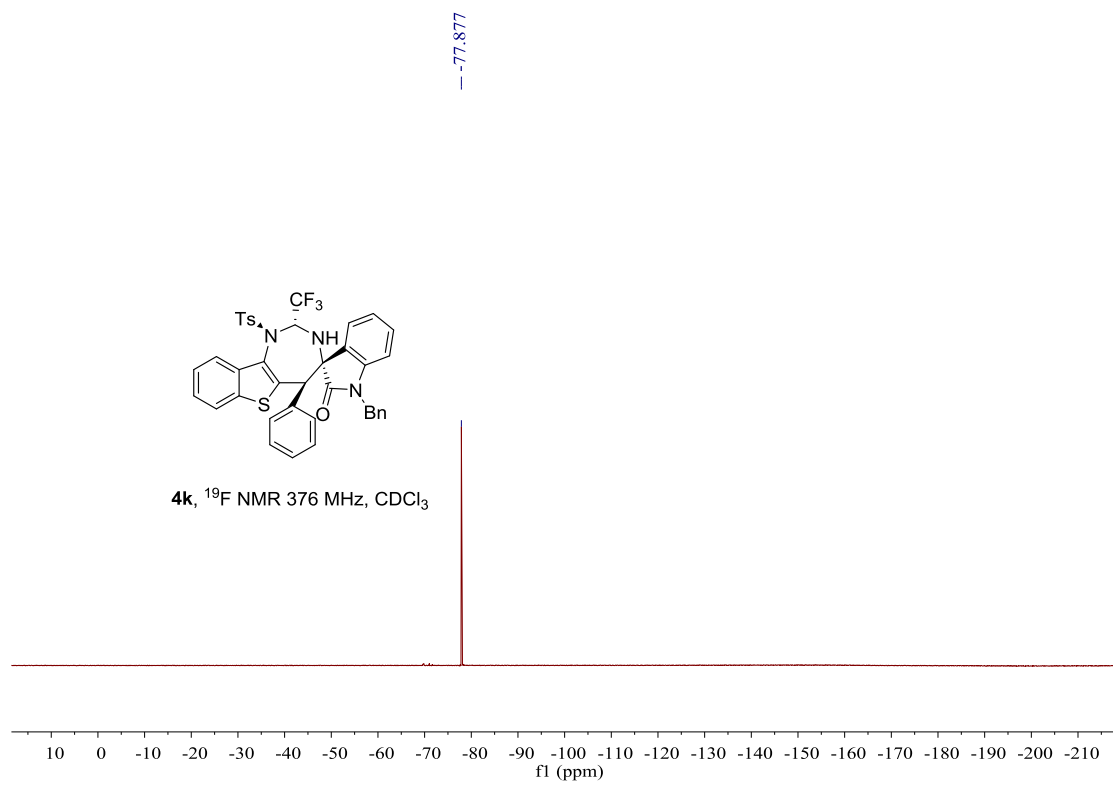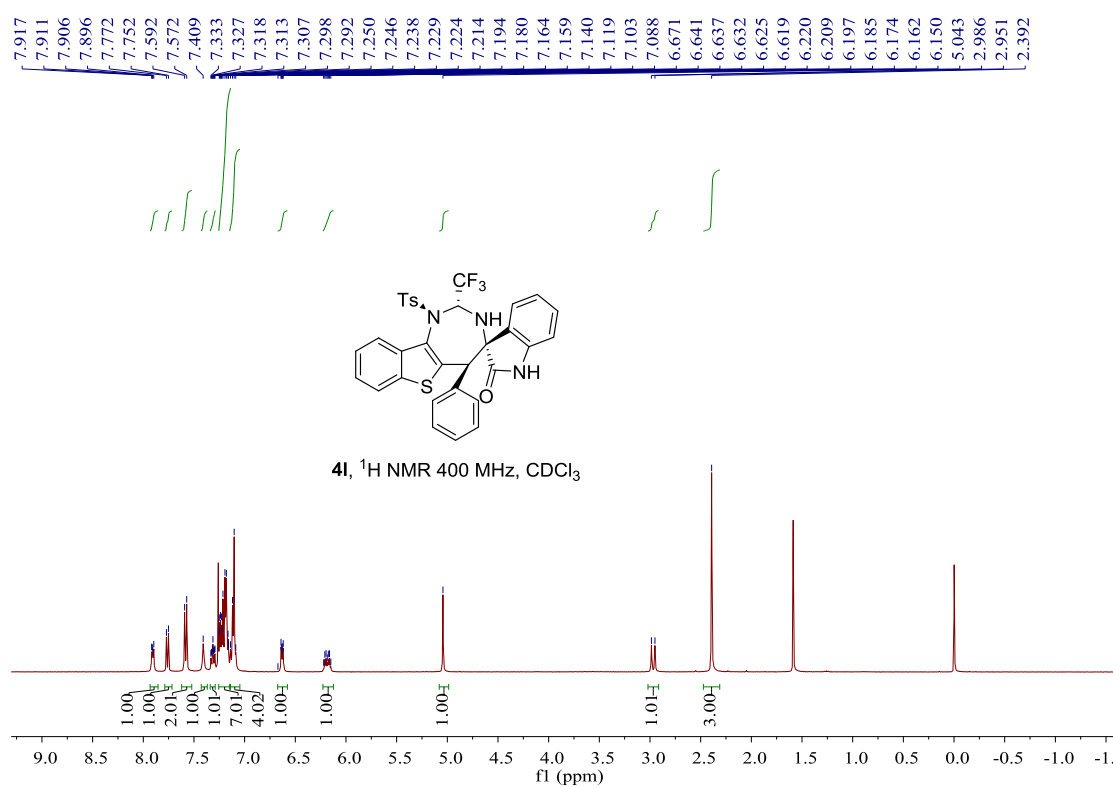

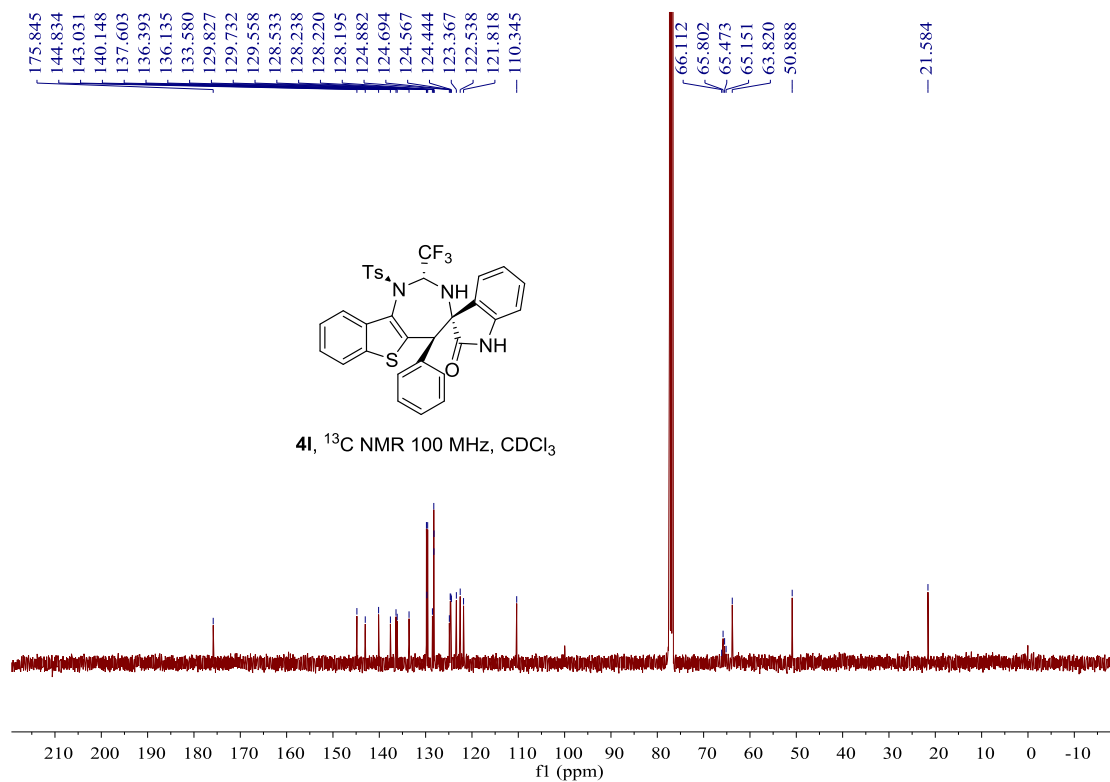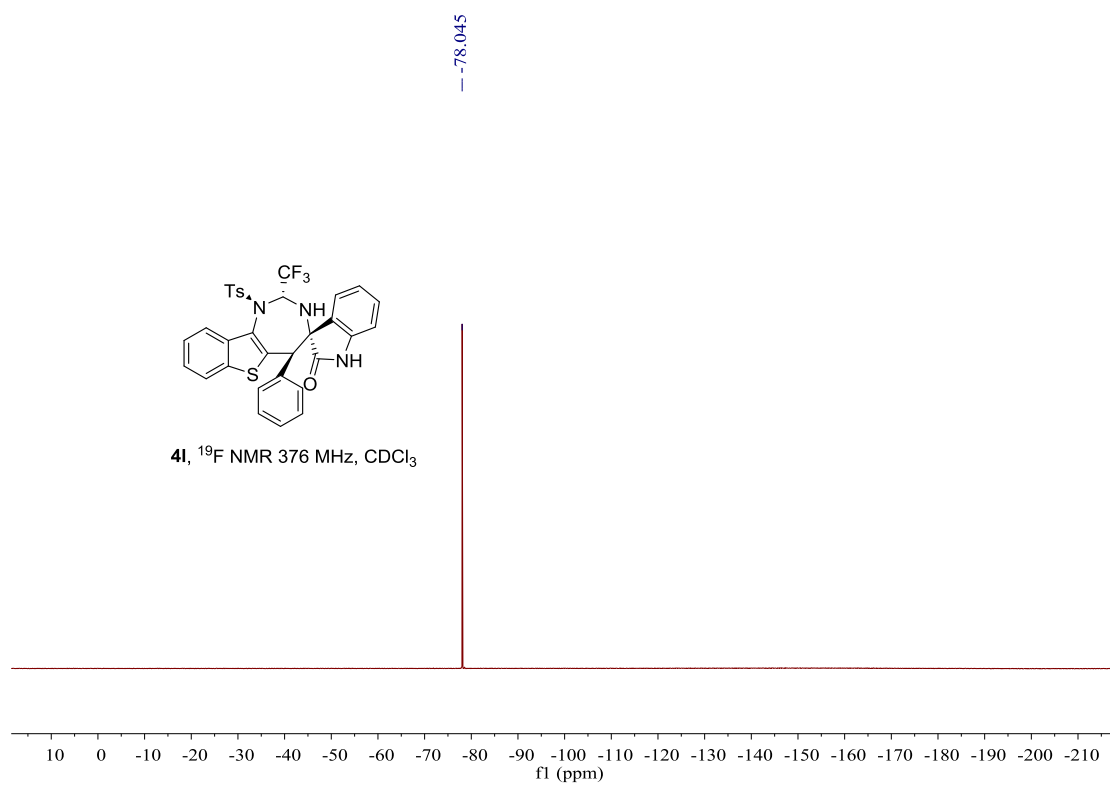

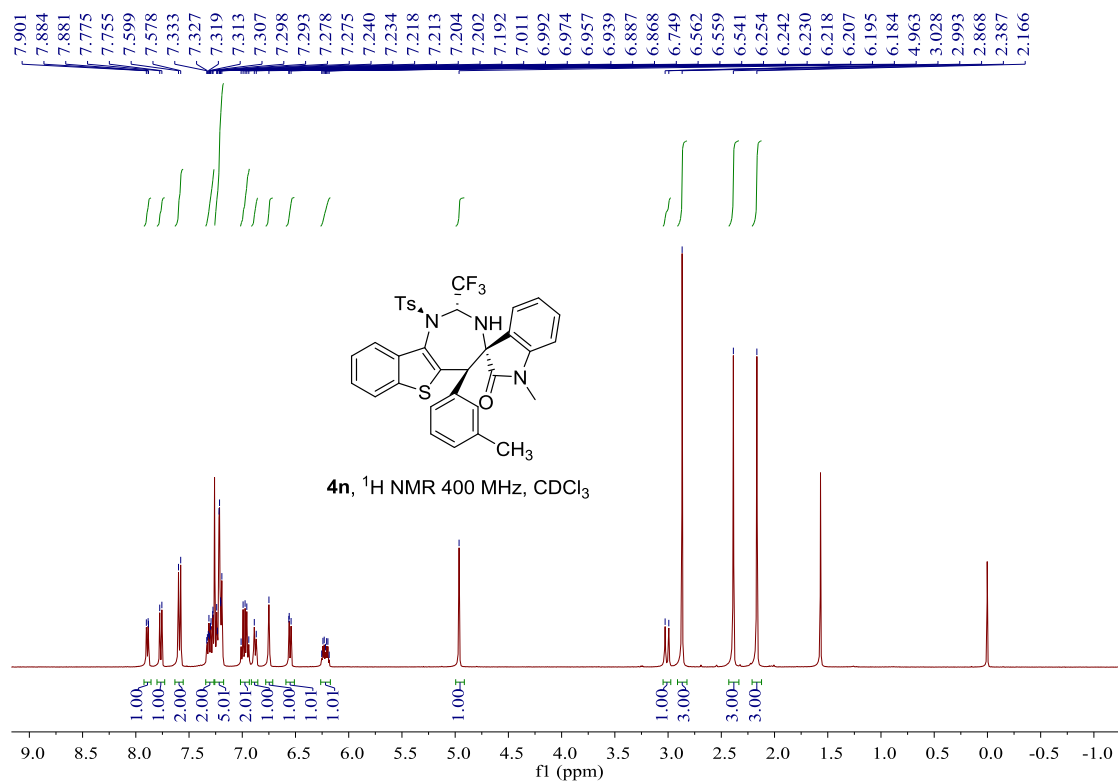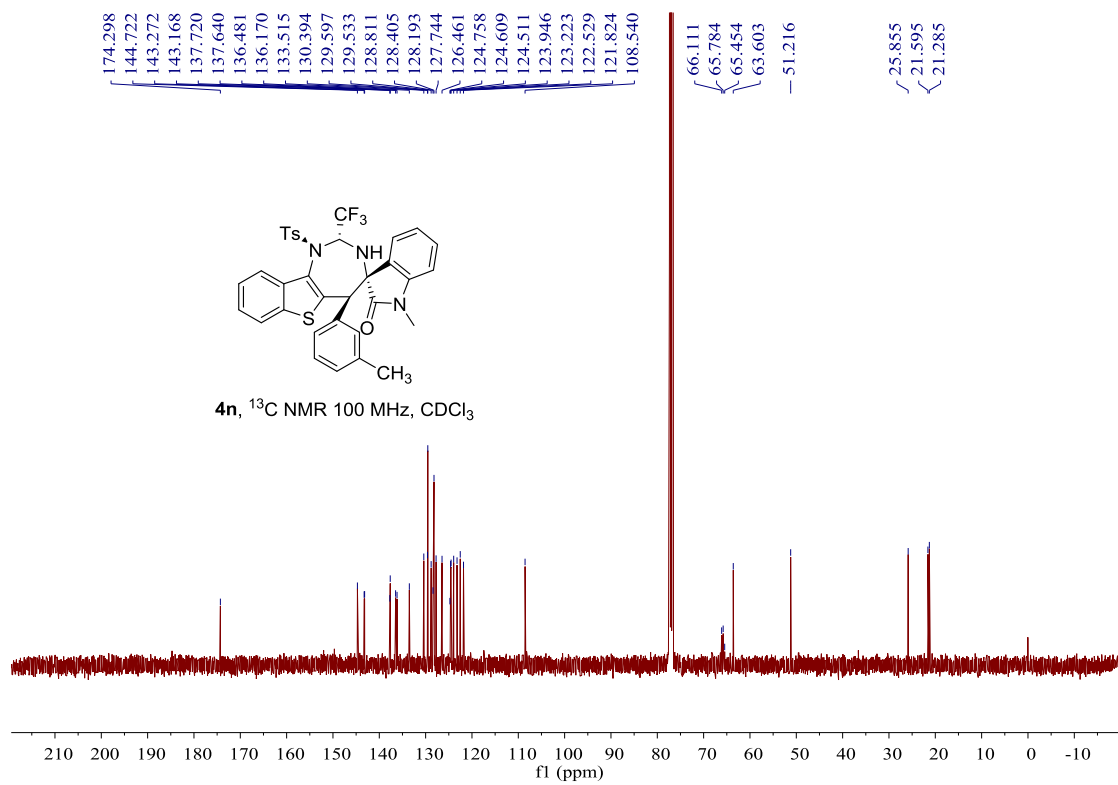

-78.048

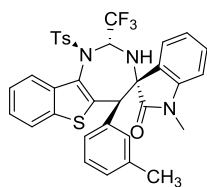

**4n**, <sup>19</sup>F NMR 376 MHz, CDCl<sub>3</sub>

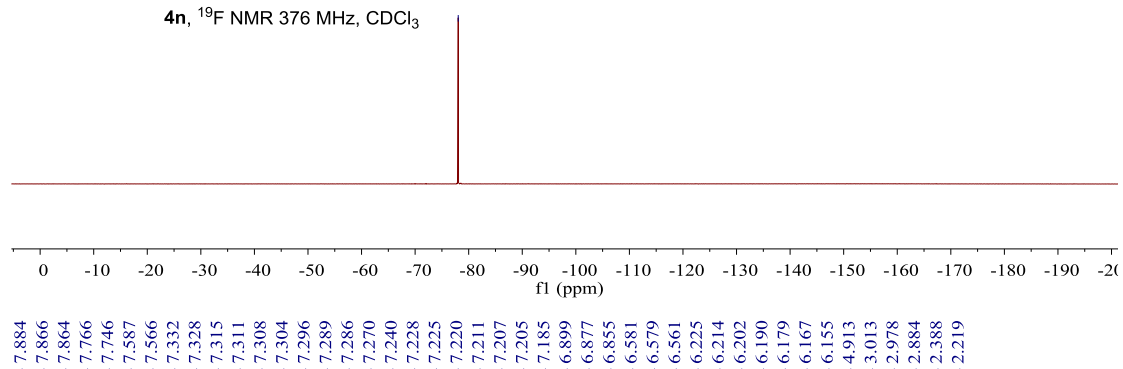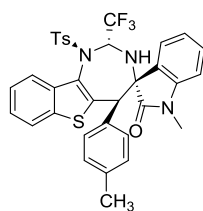

**4o**, <sup>1</sup>H NMR 400 MHz, CDCl<sub>3</sub>

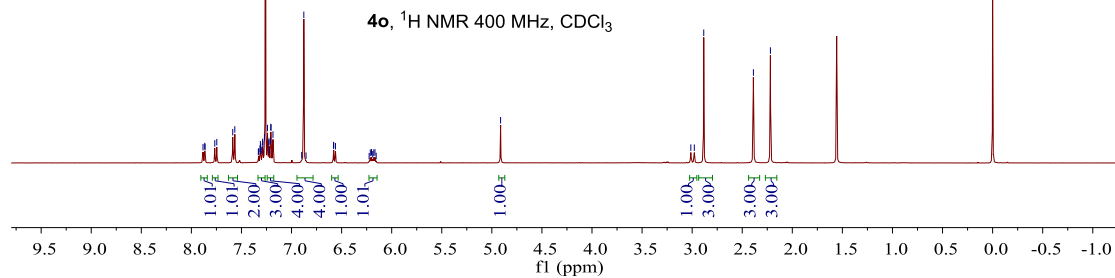



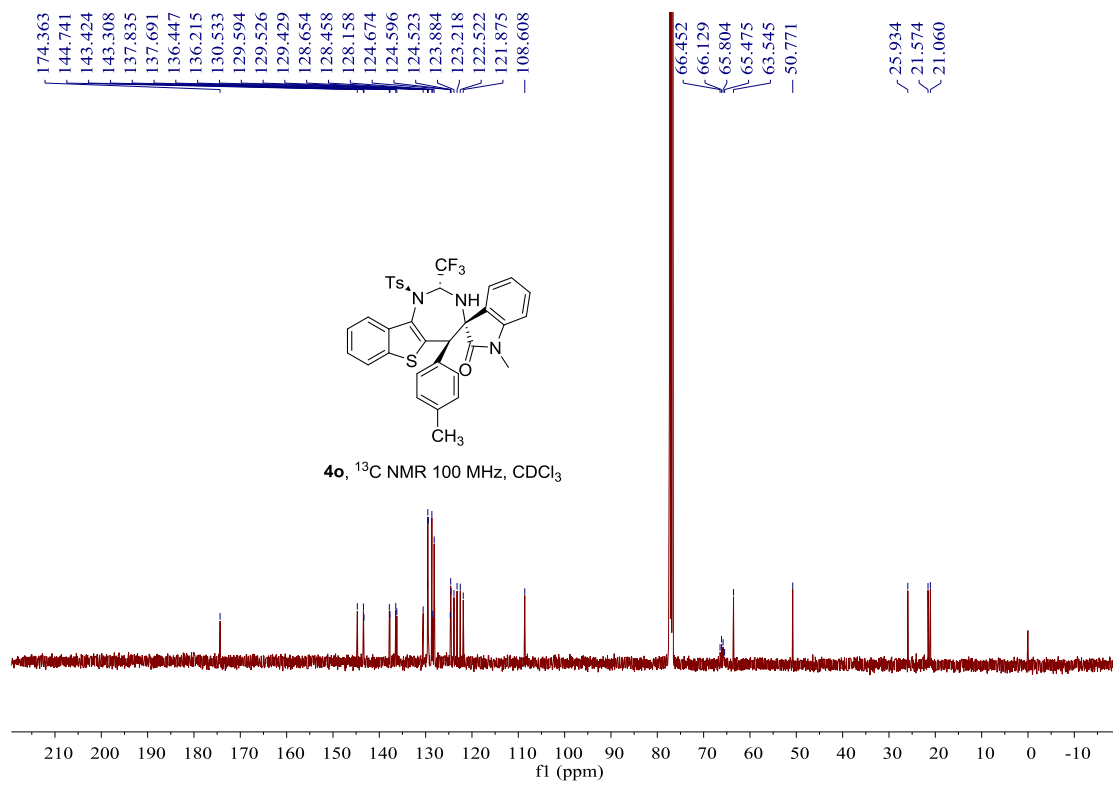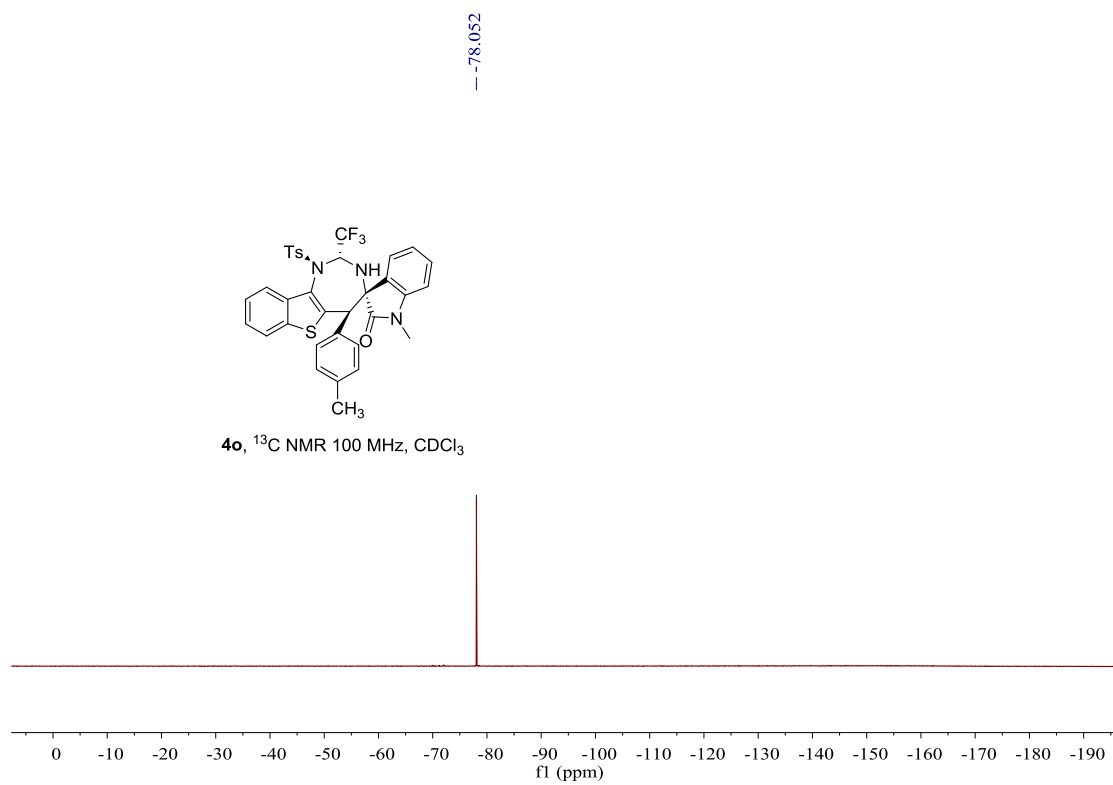



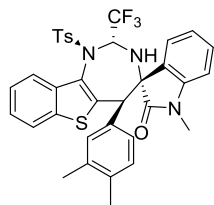

4p,  $^{19}\text{F}$  NMR 376 MHz,  $\text{CDCl}_3$

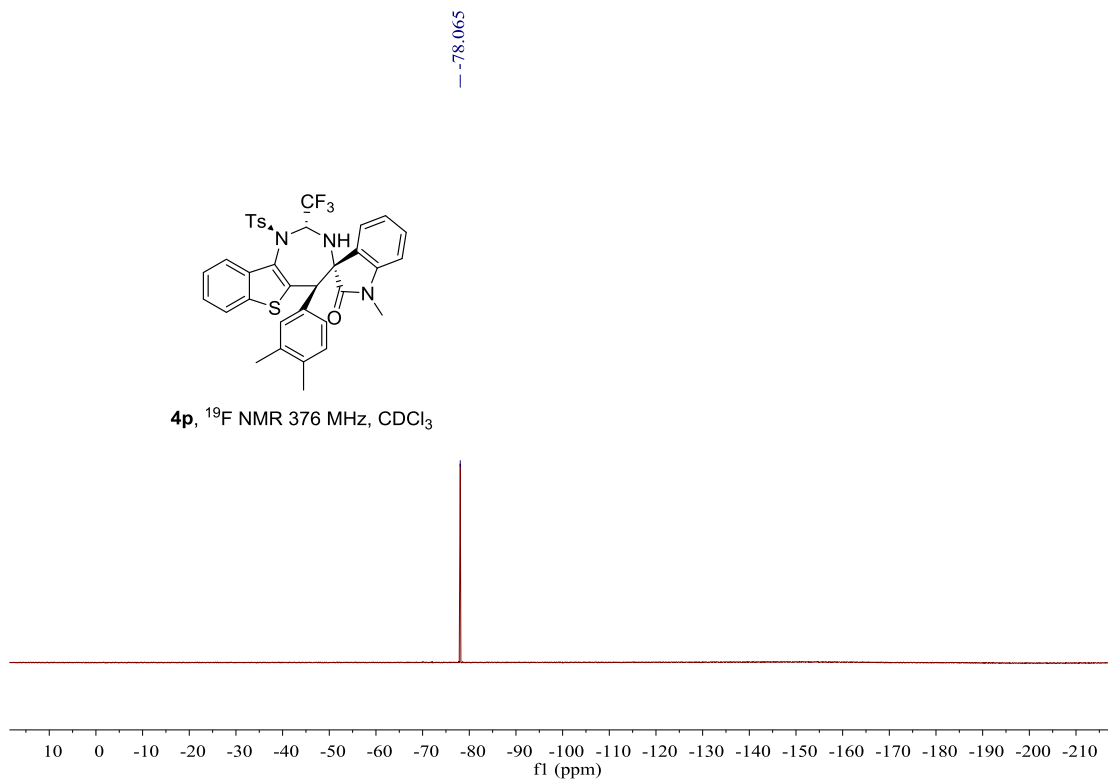

7.927  
7.909  
7.782  
7.761  
7.598  
7.577  
7.338  
7.335  
7.329  
7.326  
7.320  
7.318  
7.314  
7.311  
7.307  
7.301  
7.296  
7.292  
7.288  
7.282  
7.279  
7.218  
7.210  
7.207  
7.197  
7.190  
7.187  
7.172  
7.170  
7.142  
7.122  
7.052  
7.048  
7.038  
7.030  
7.022  
7.016  
6.816  
6.794  
6.772  
6.606  
6.603  
6.585  
6.227  
6.193  
5.081  
3.019  
2.984  
2.895  
2.397

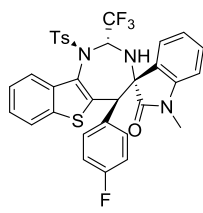

4q,  $^1\text{H}$  NMR 400 MHz,  $\text{CDCl}_3$

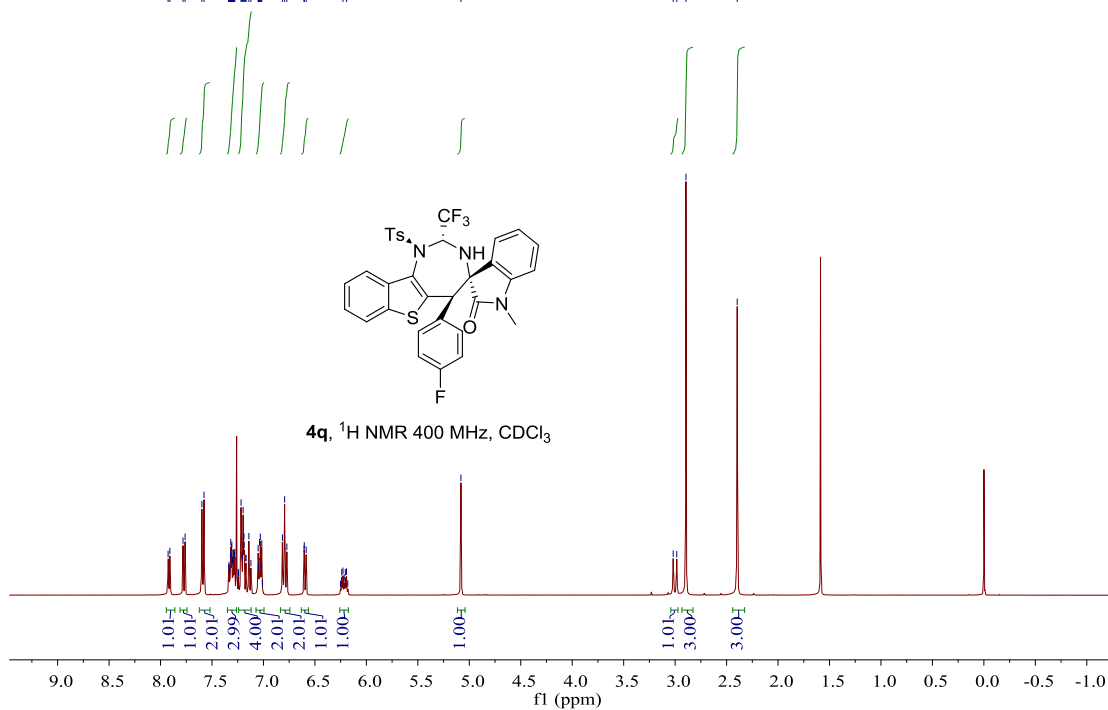

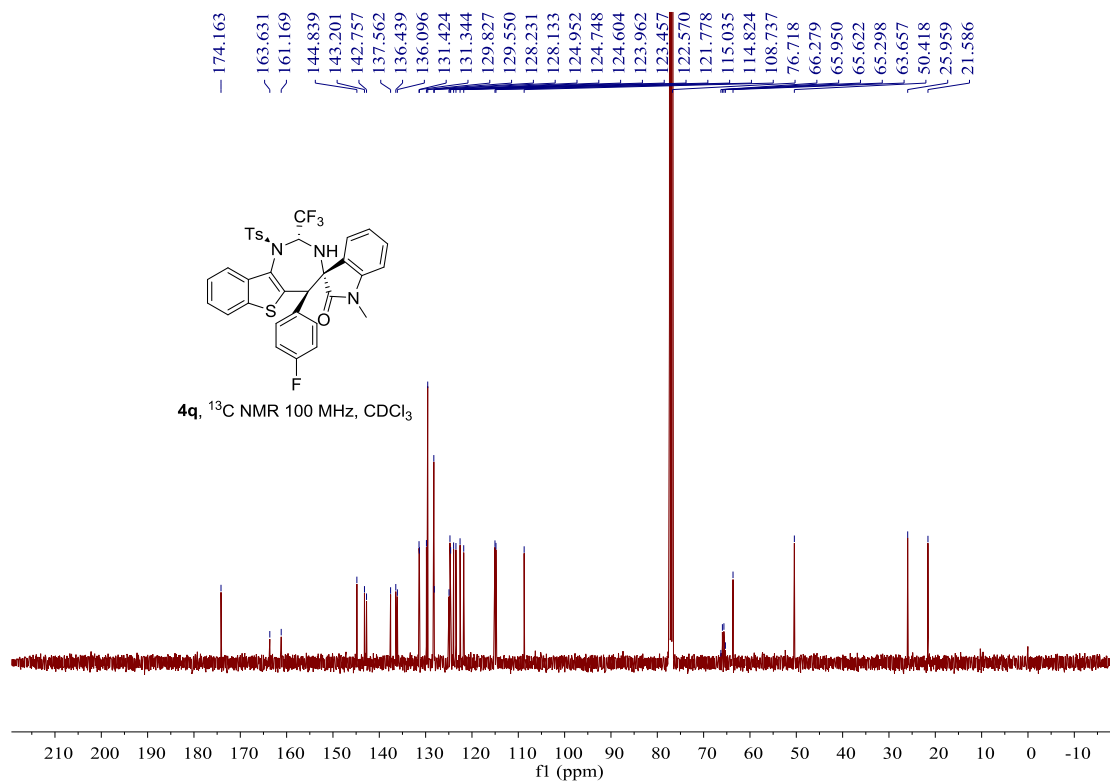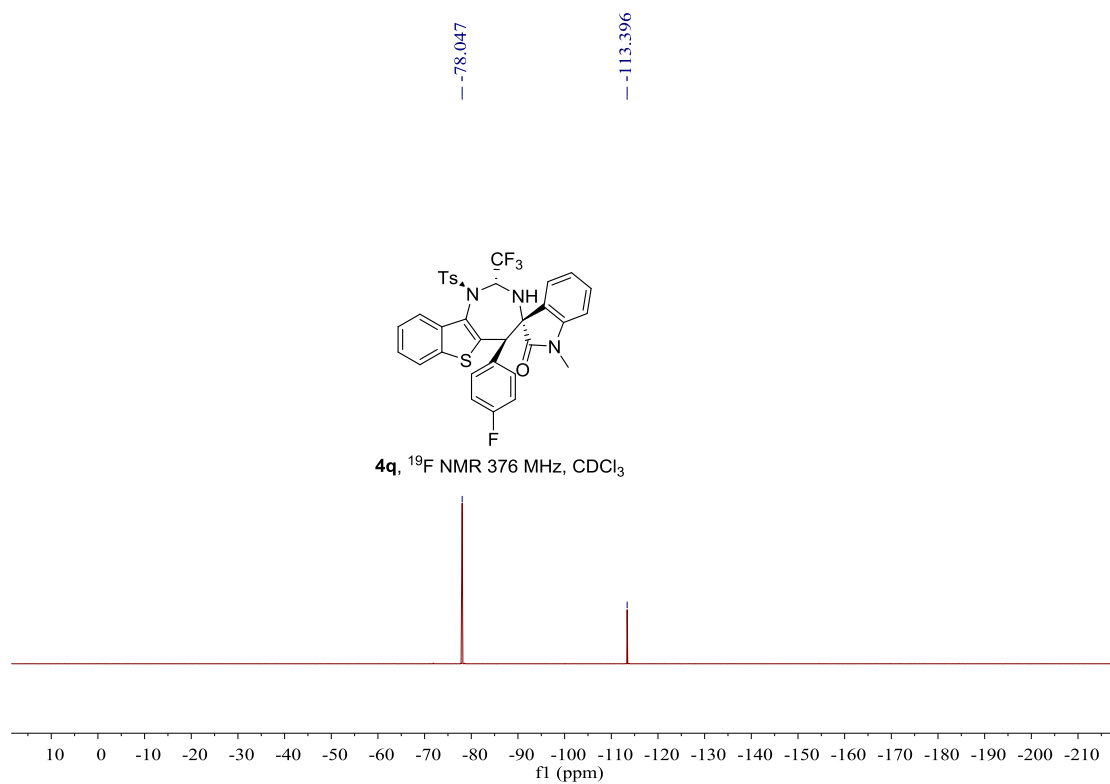

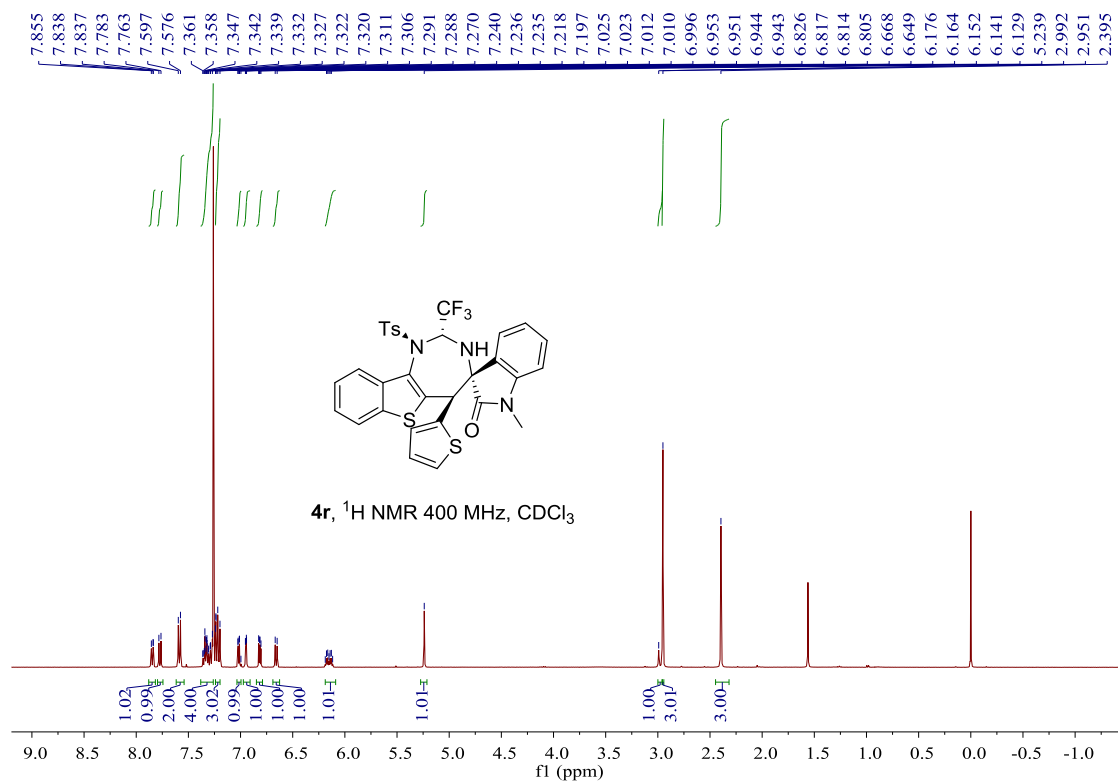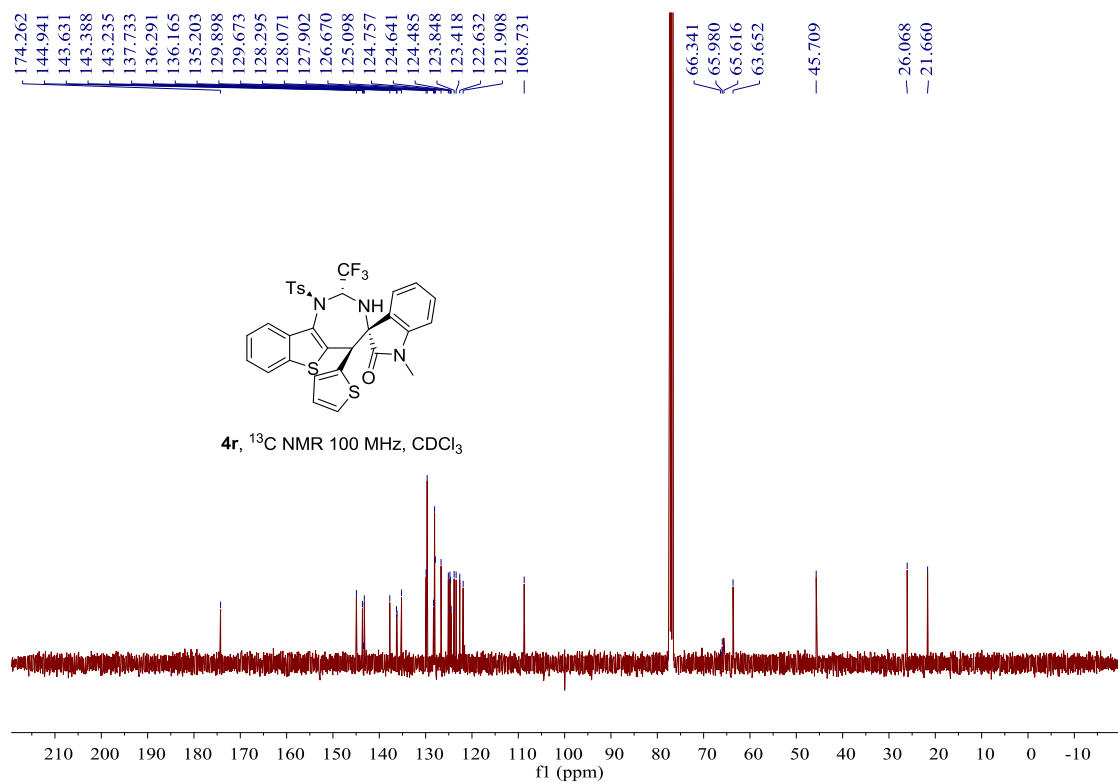

-78.055

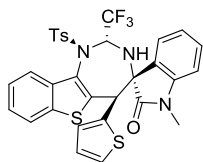

4r, <sup>1</sup>H NMR 400 MHz, CDCl<sub>3</sub>

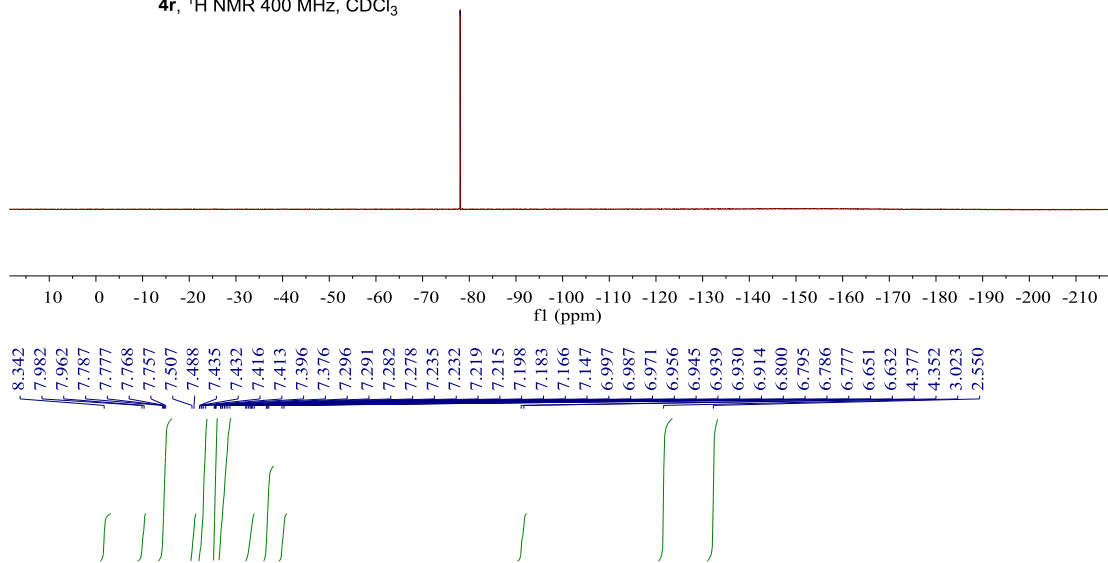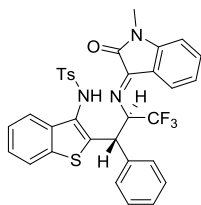

5a, <sup>1</sup>H NMR 400 MHz, CDCl<sub>3</sub>

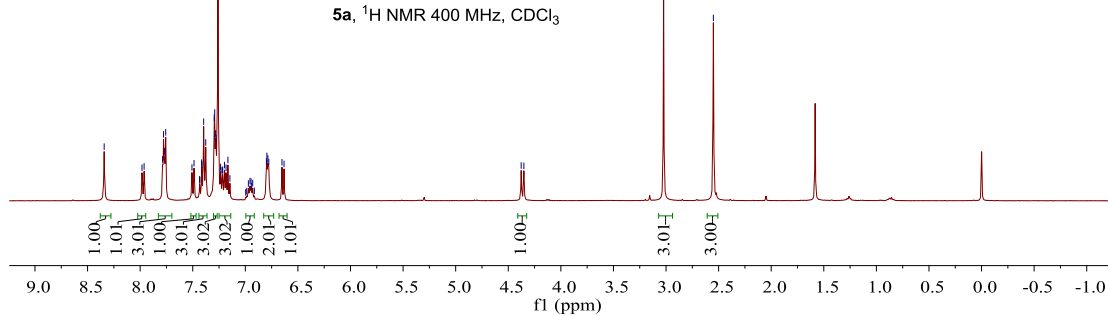

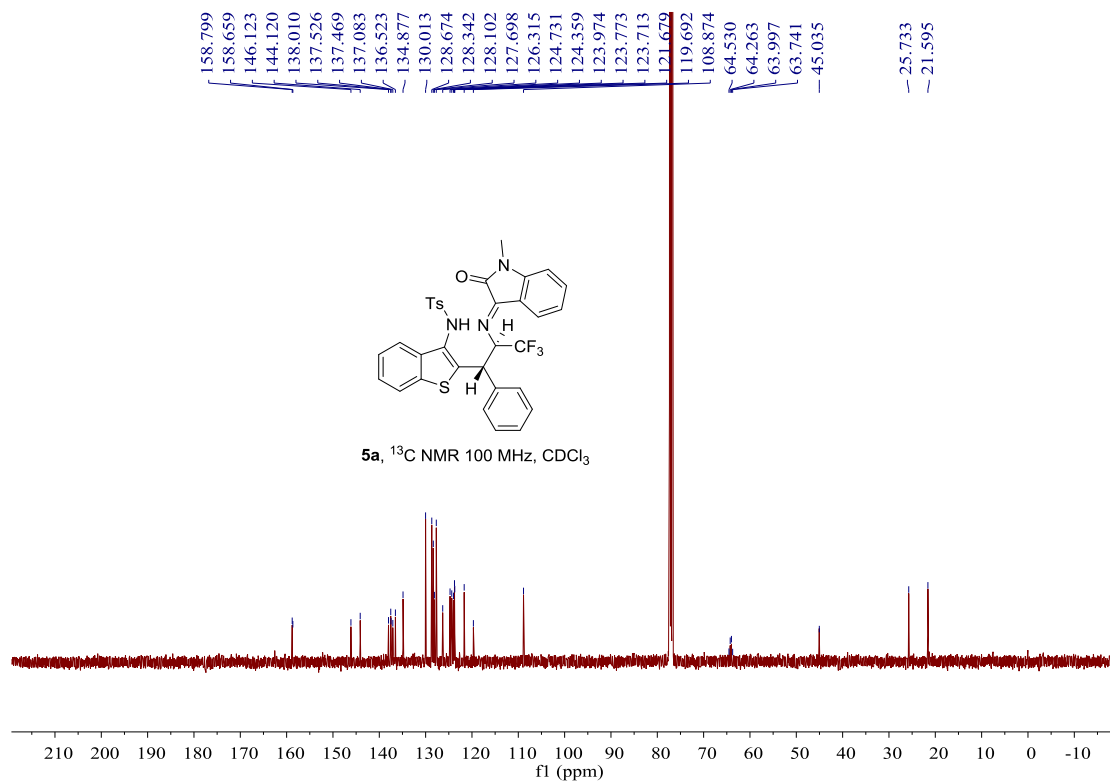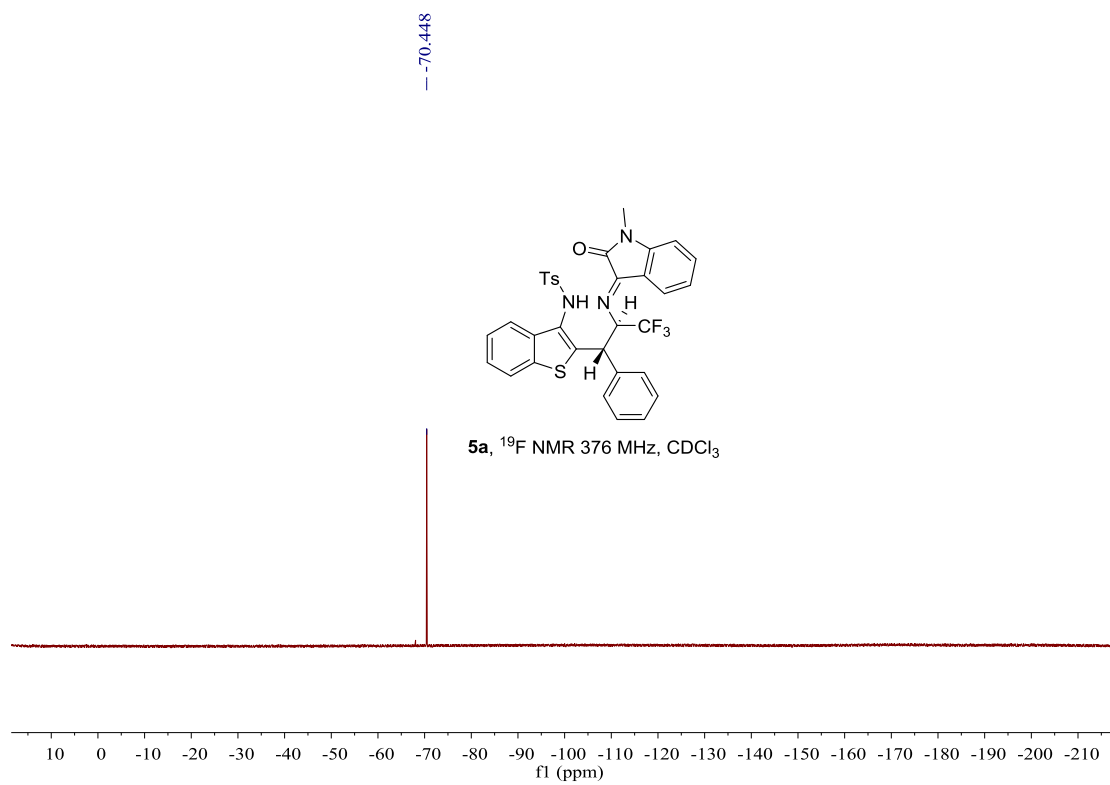

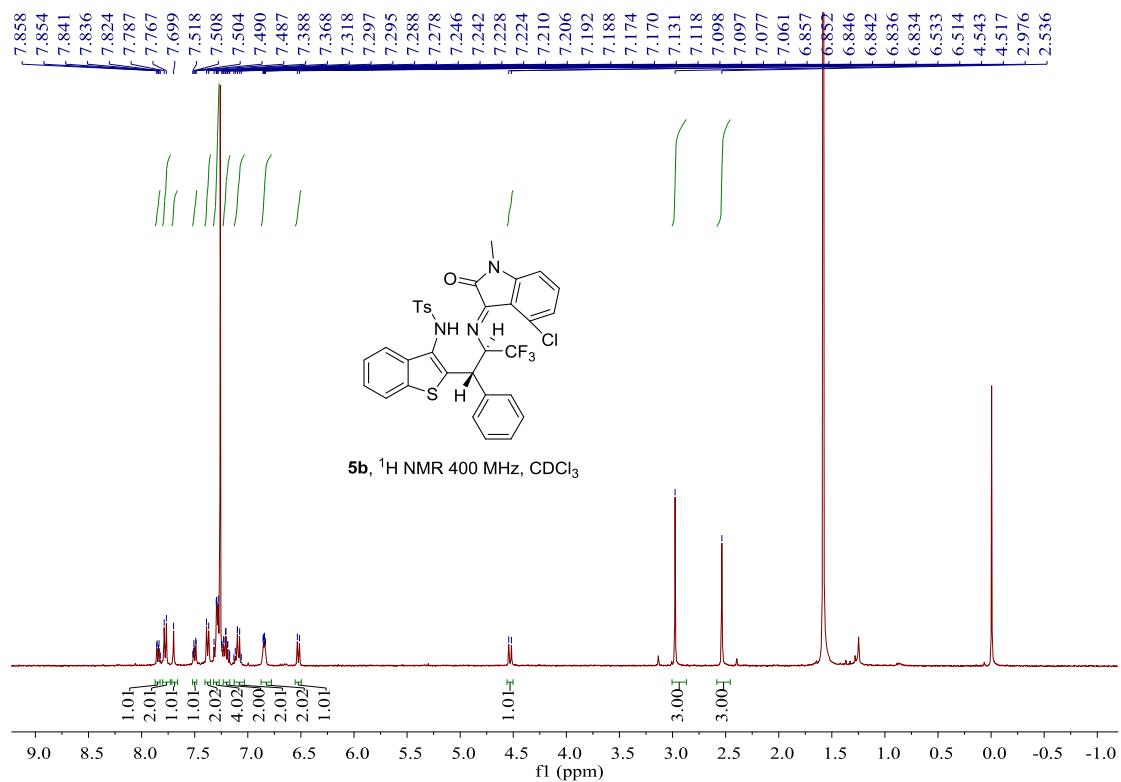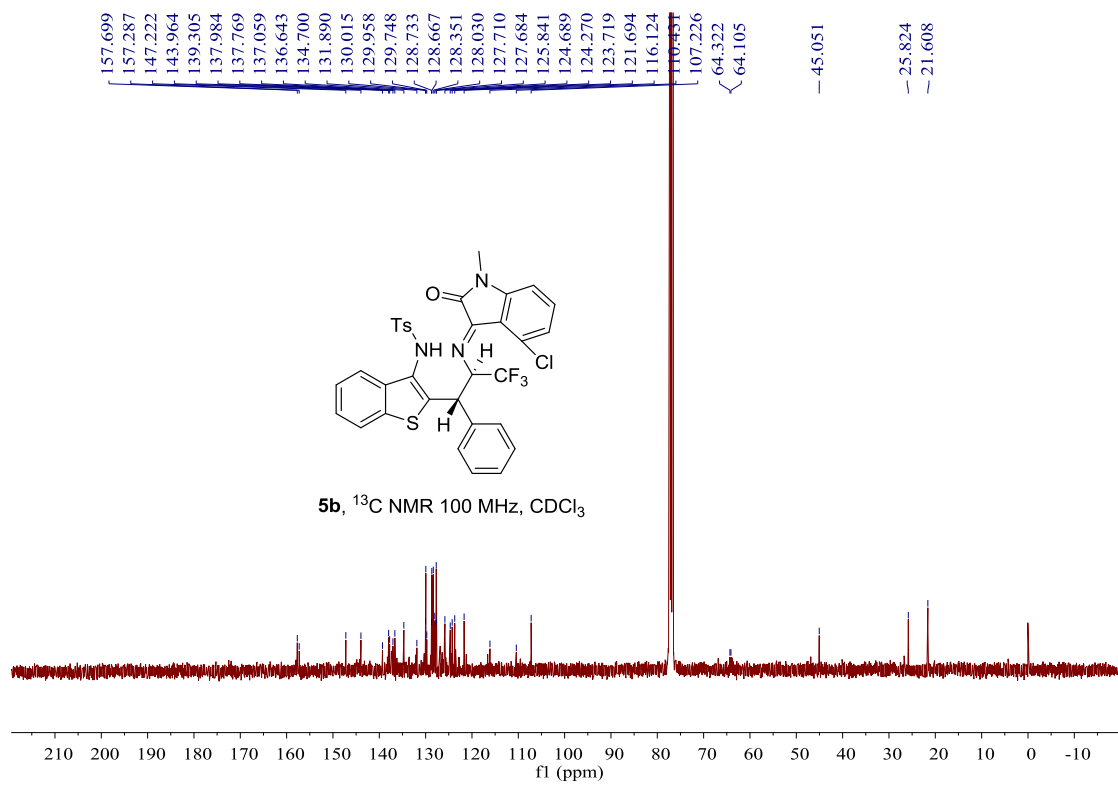



-70.795

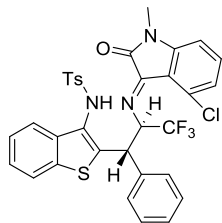

**5b**,  $^{19}\text{F}$  NMR 376 MHz,  $\text{CDCl}_3$

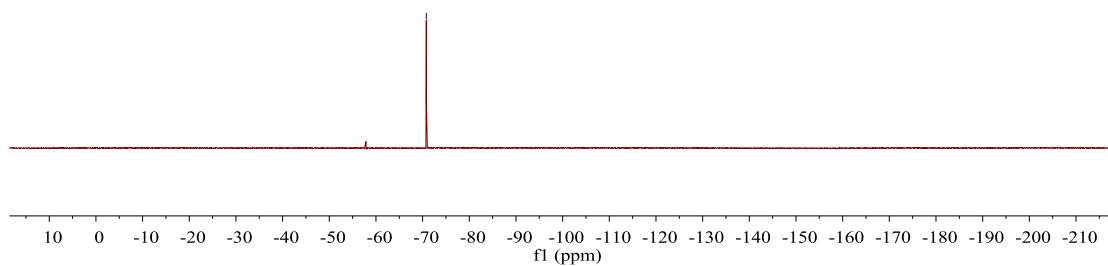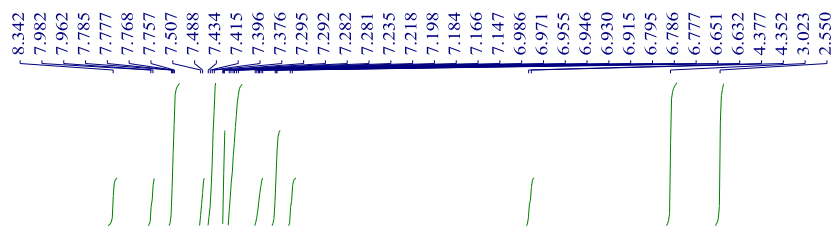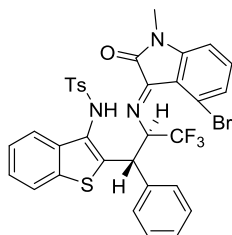

**5c**,  $^1\text{H}$  NMR 400 MHz,  $\text{CDCl}_3$

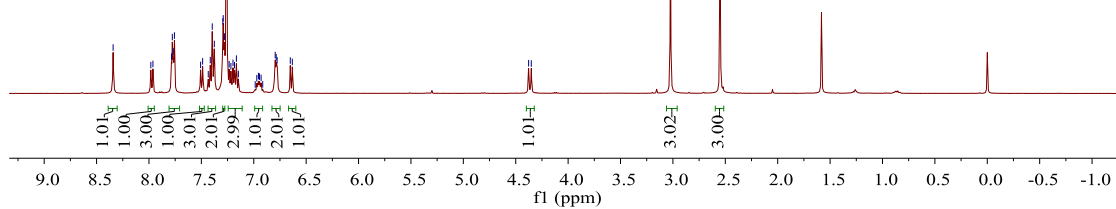

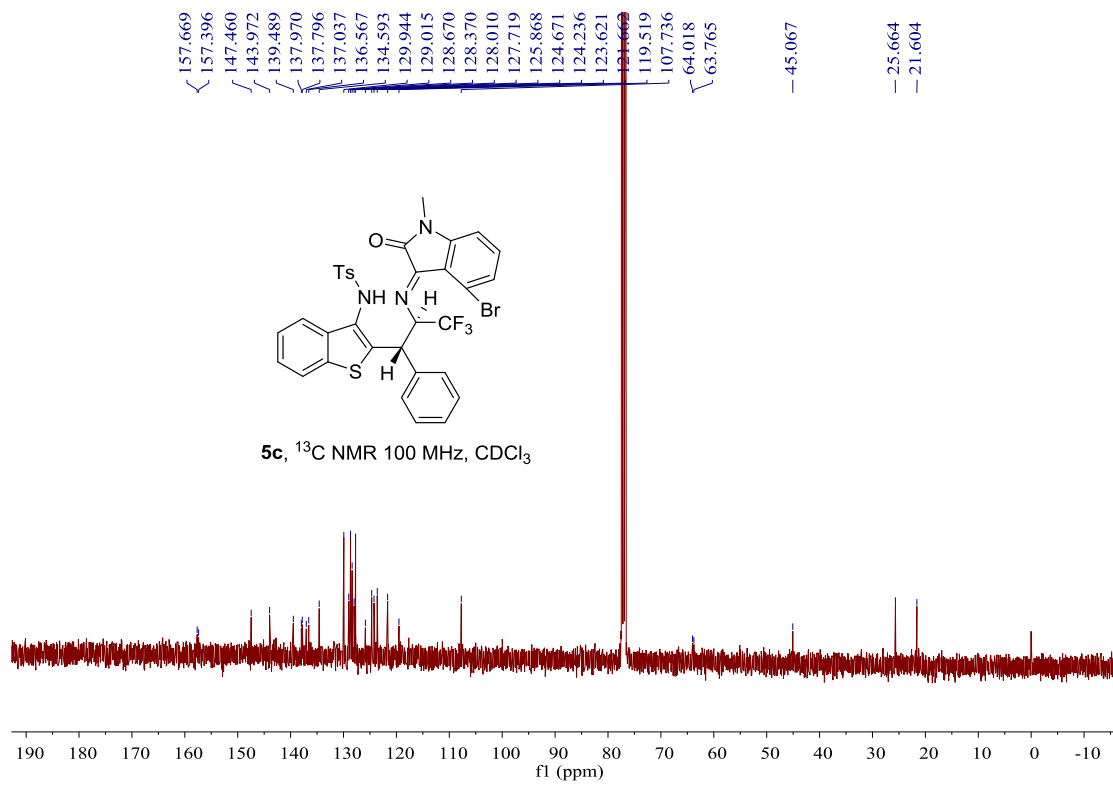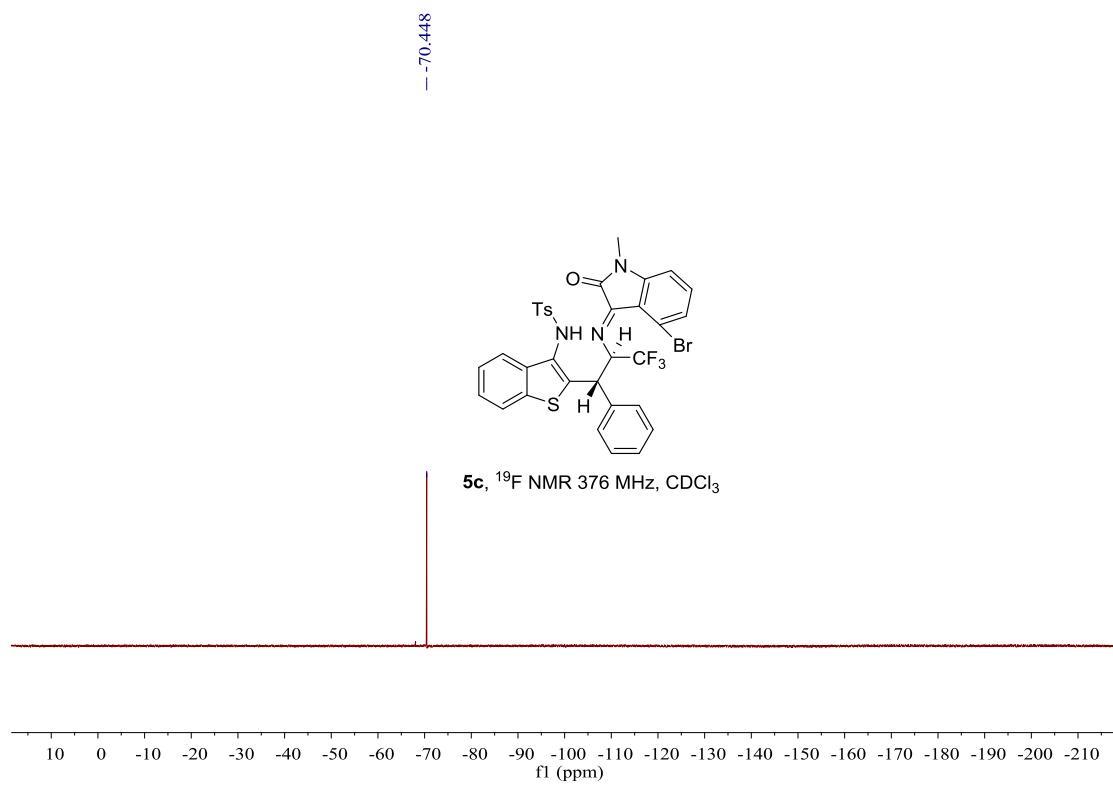

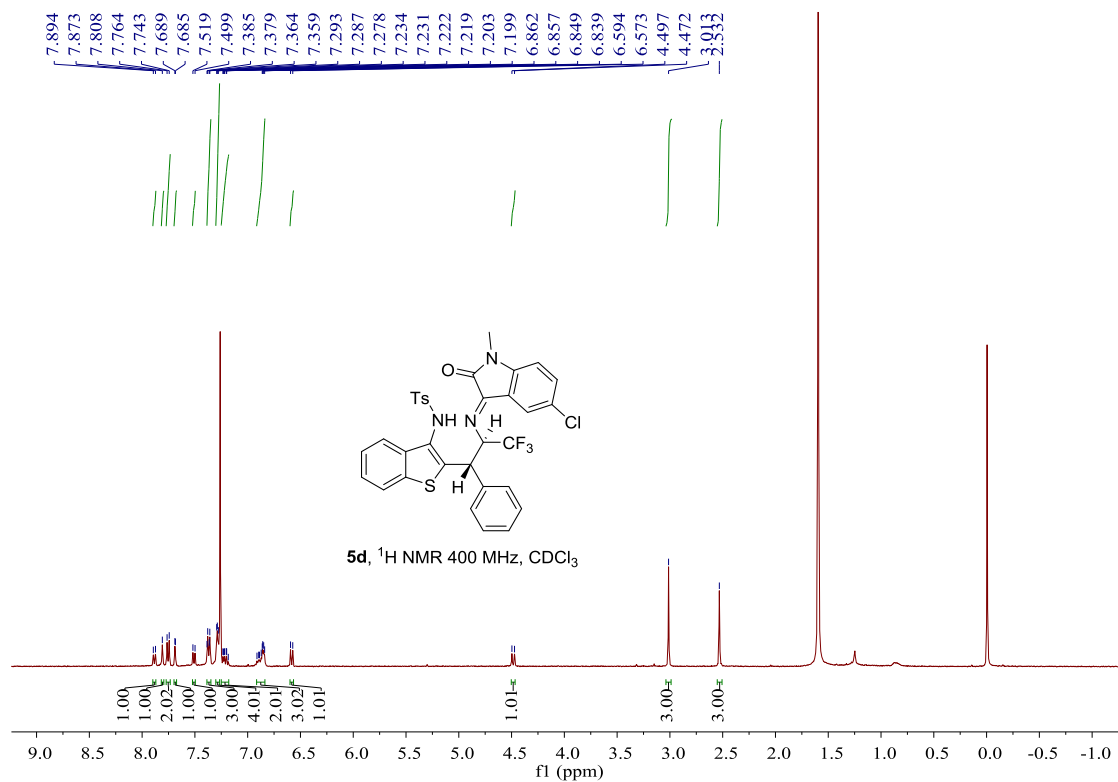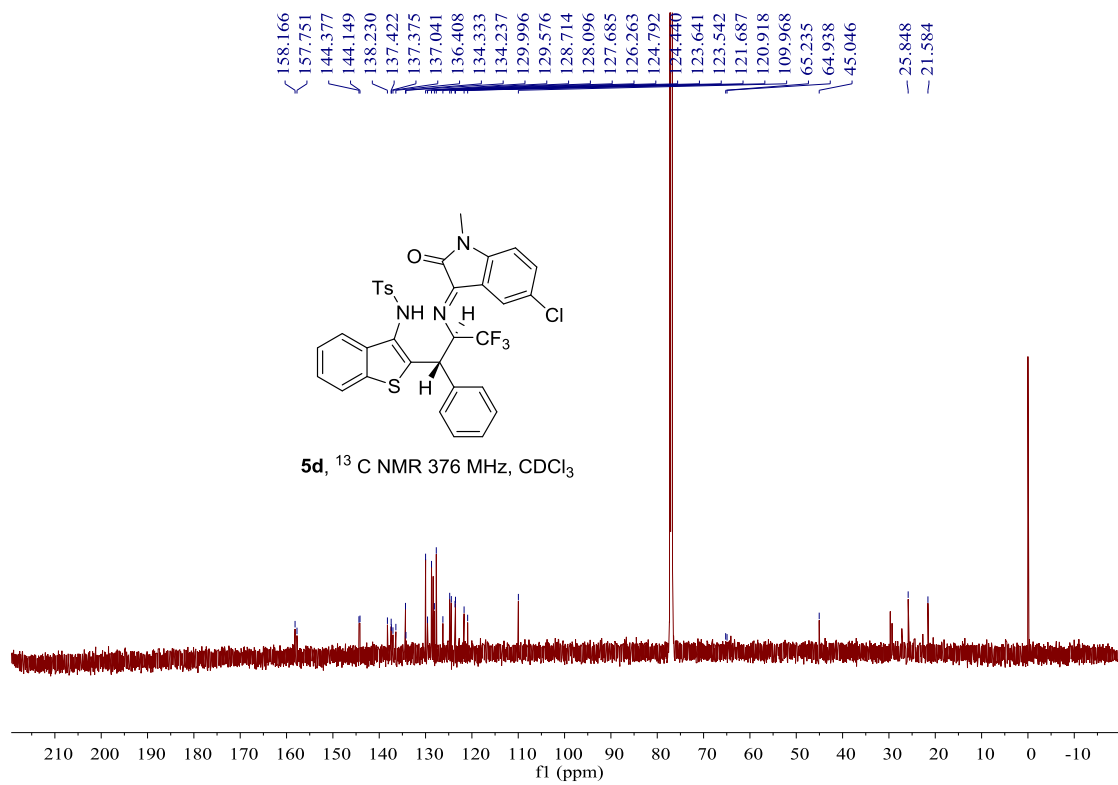

-70.595

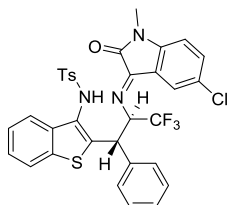

5d, <sup>19</sup>F NMR 376 MHz, CDCl<sub>3</sub>

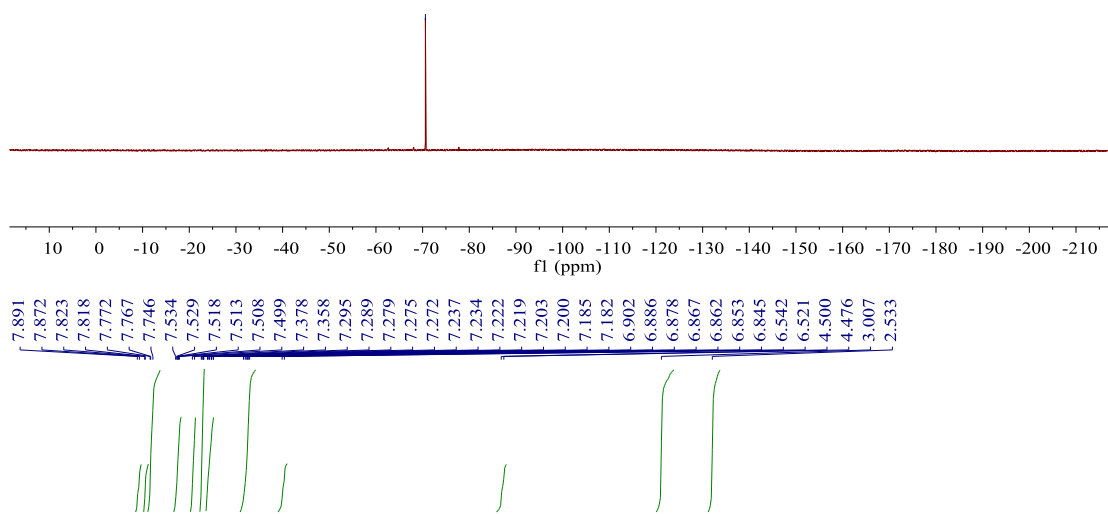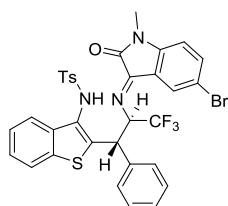

5e, <sup>1</sup>H NMR 400 MHz, CDCl<sub>3</sub>

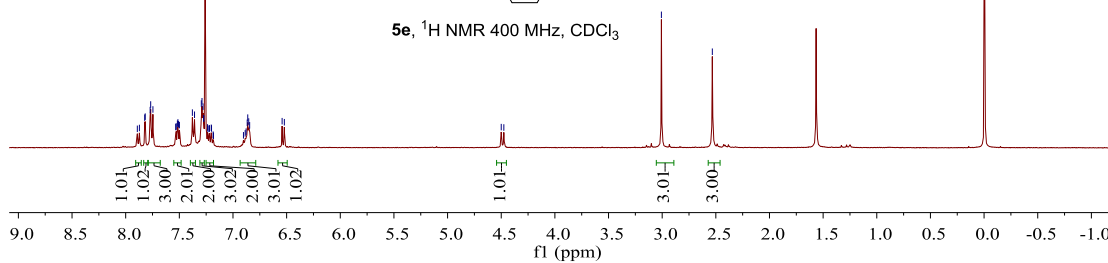

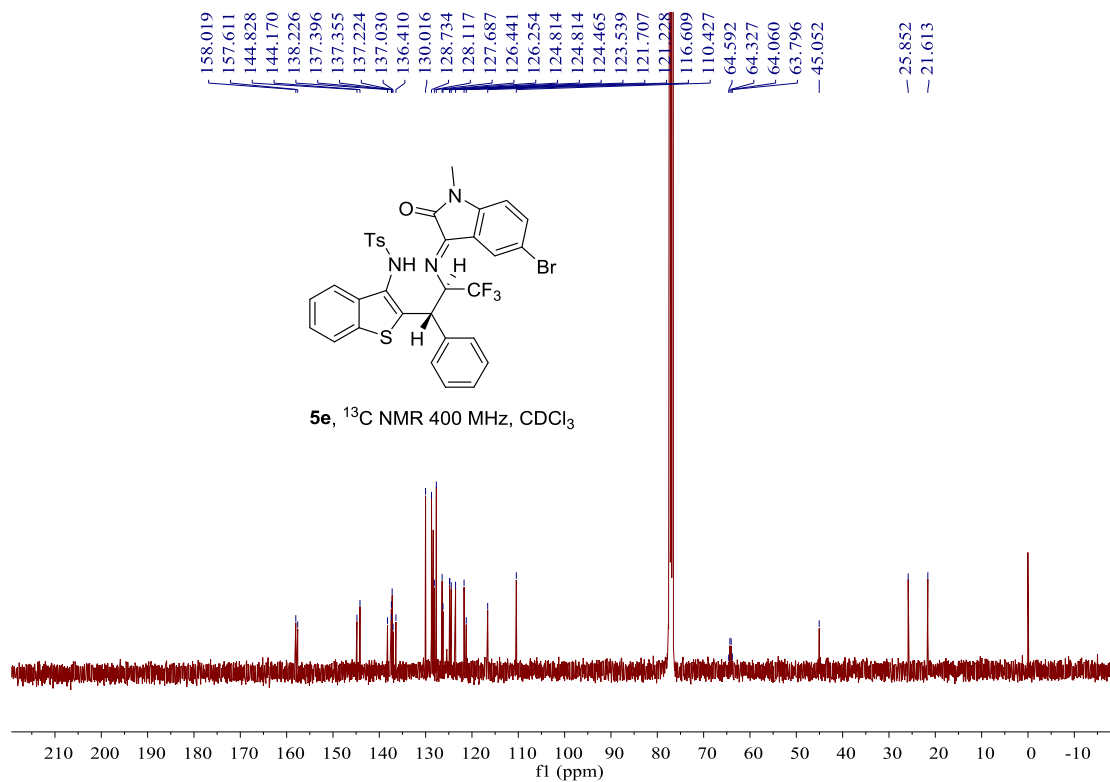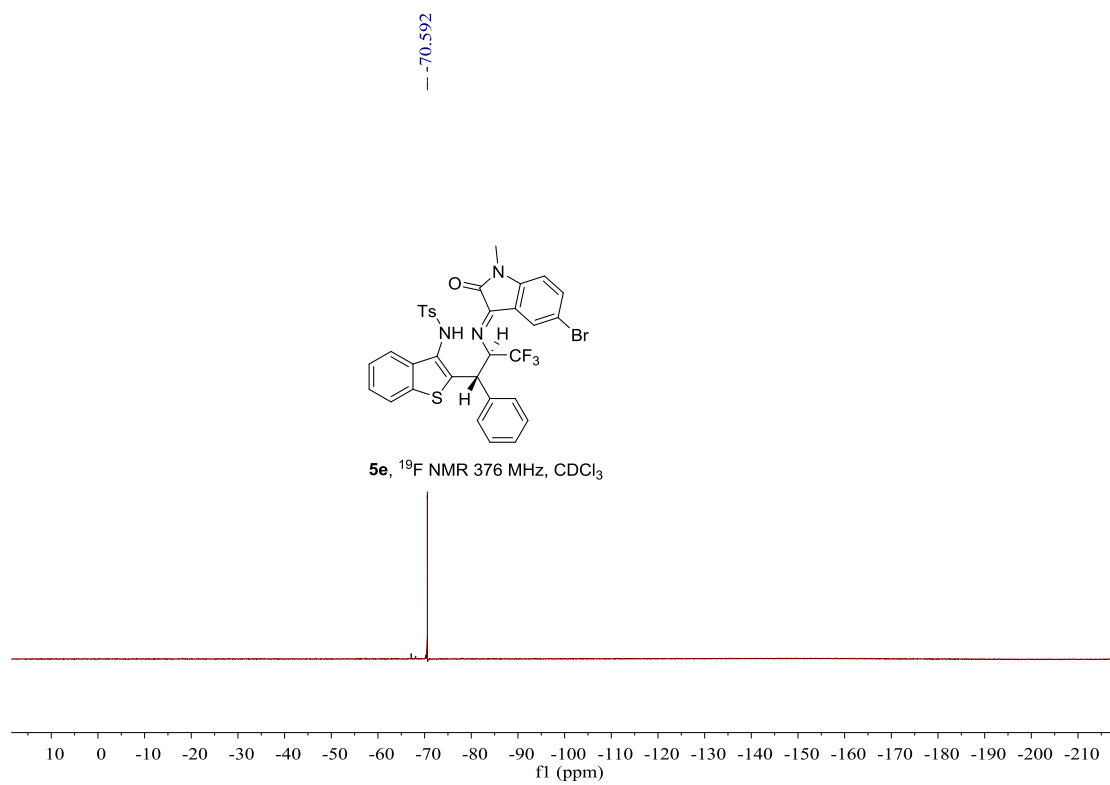

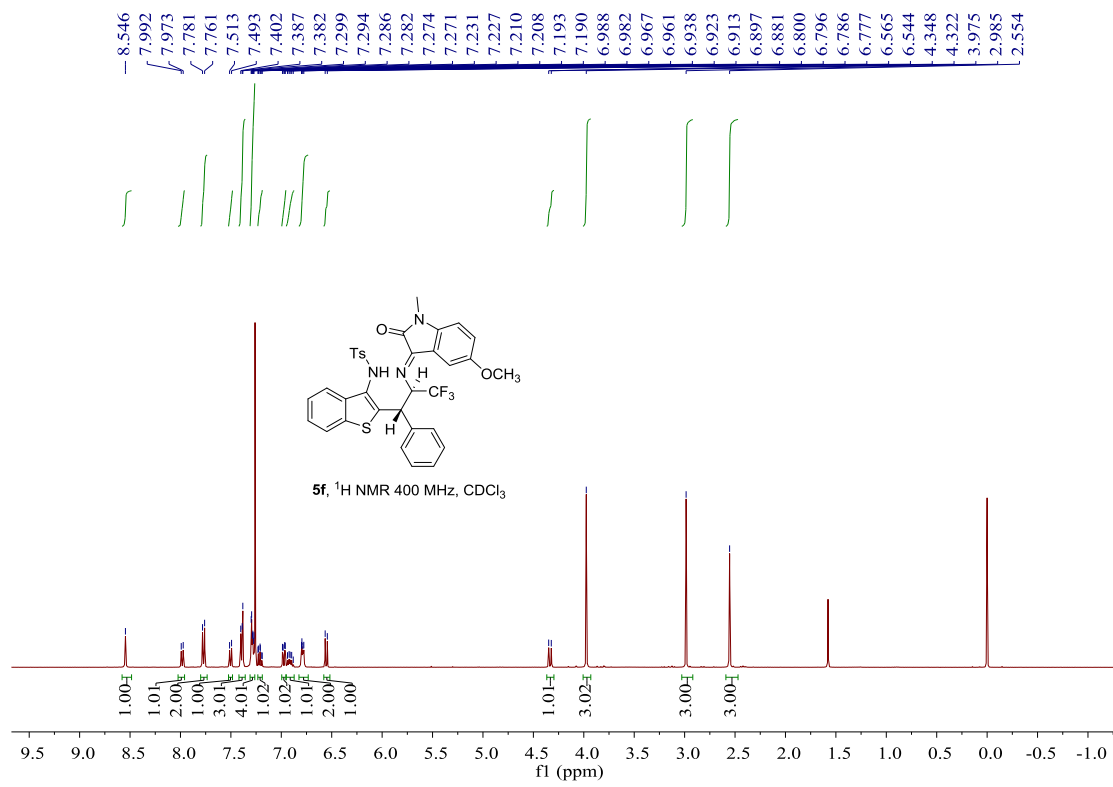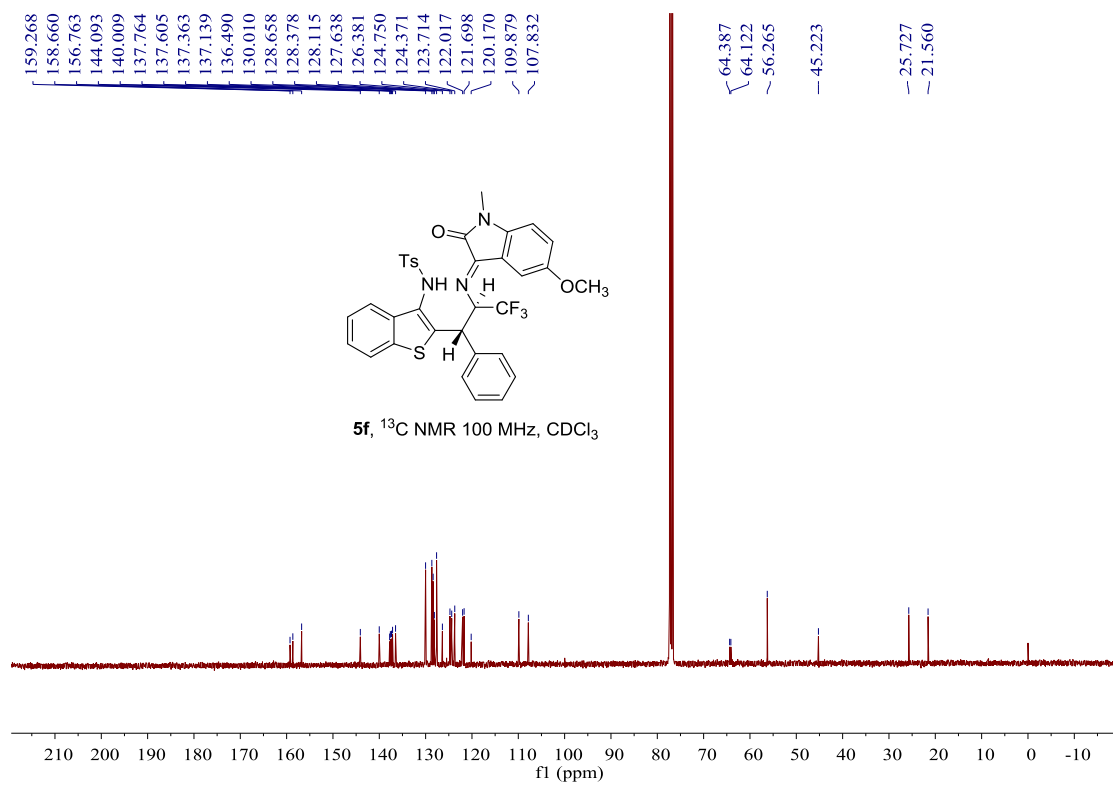

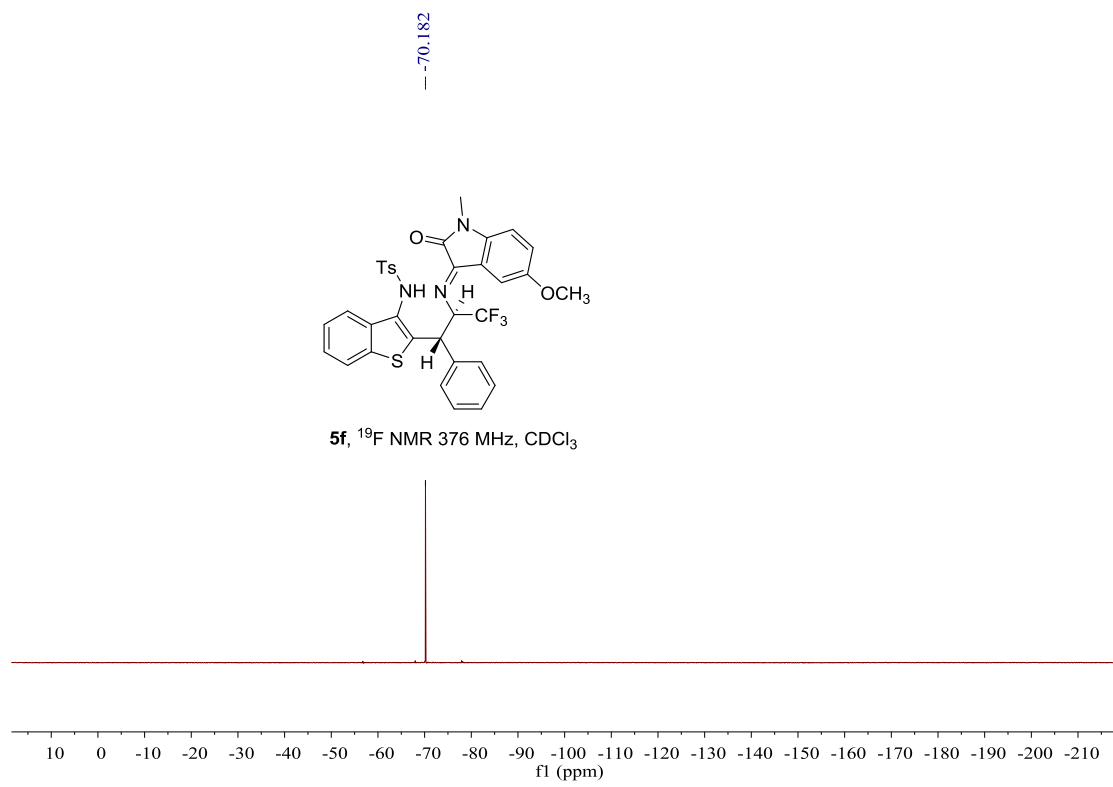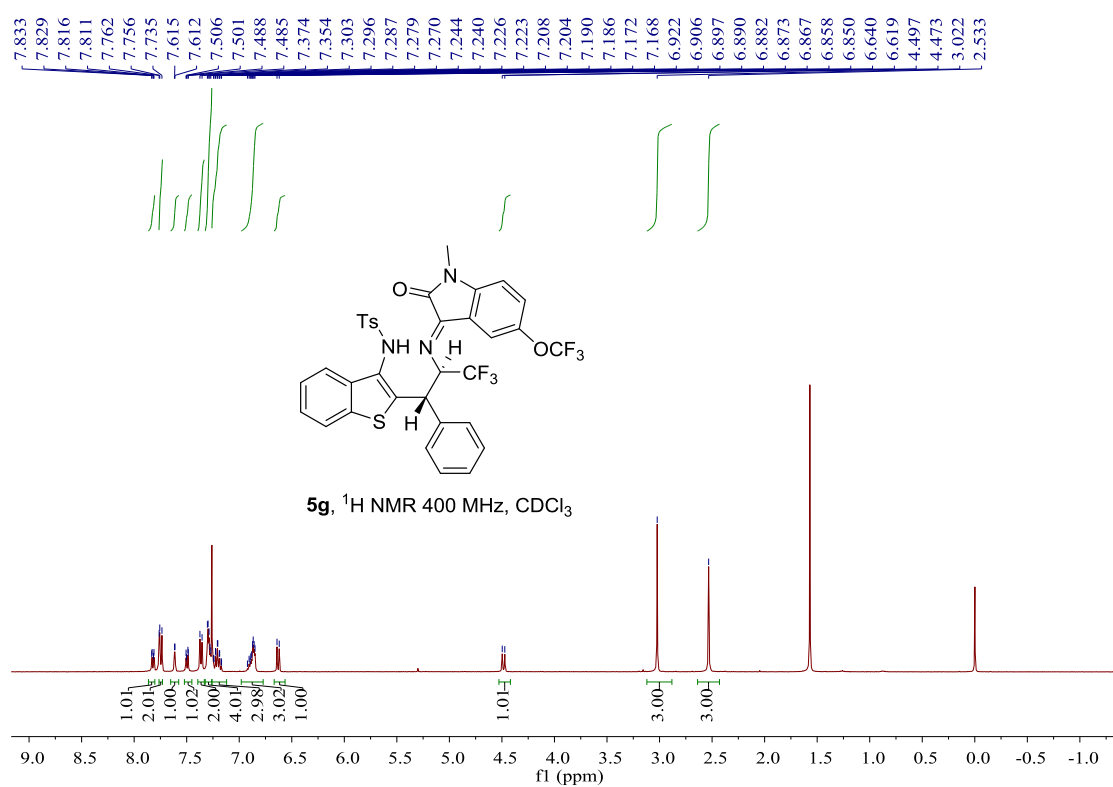

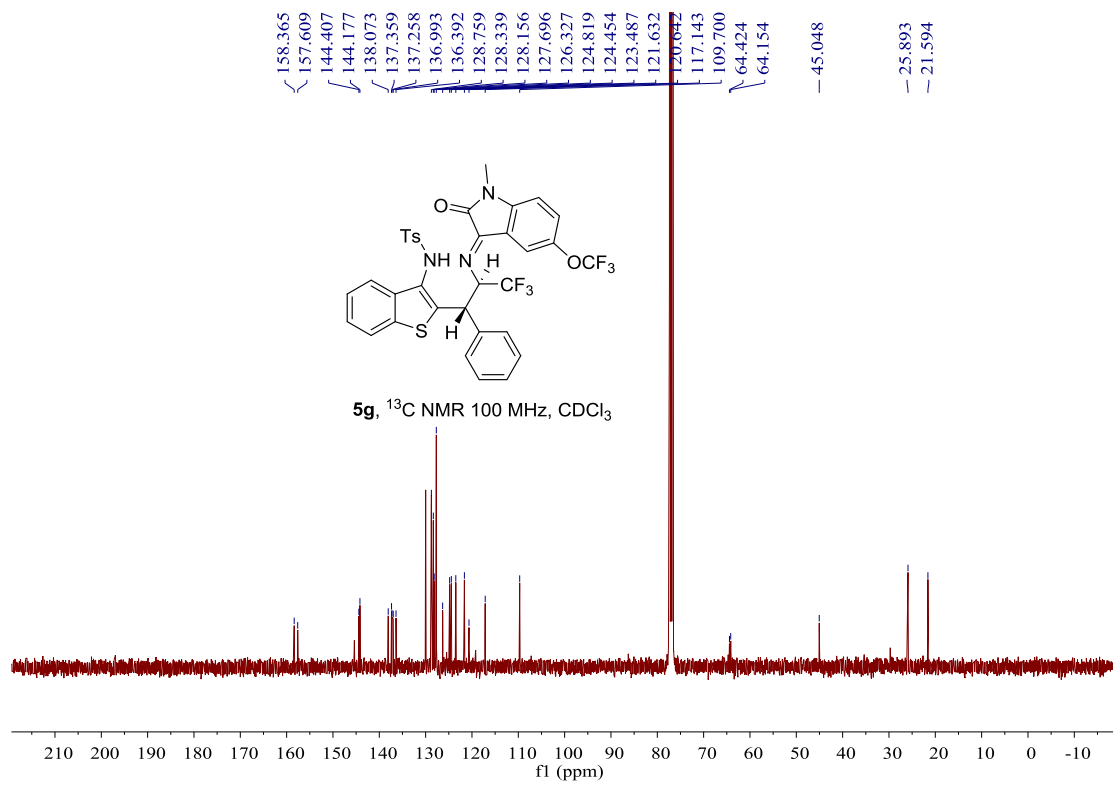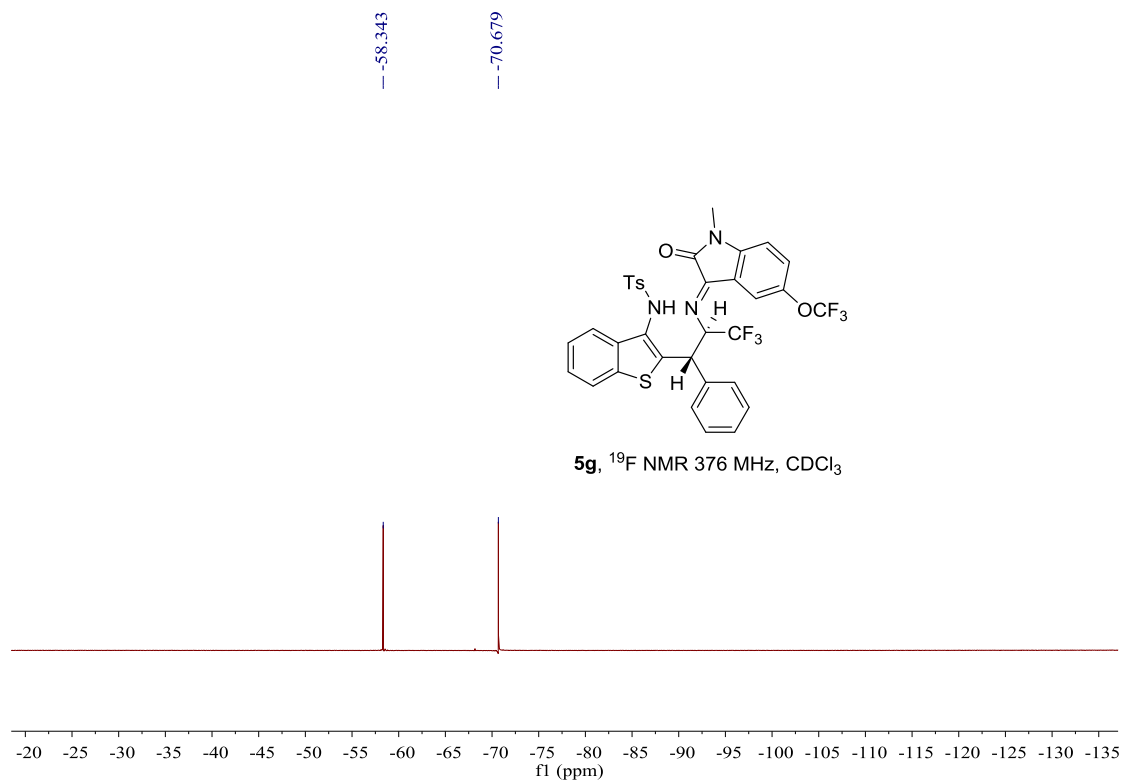



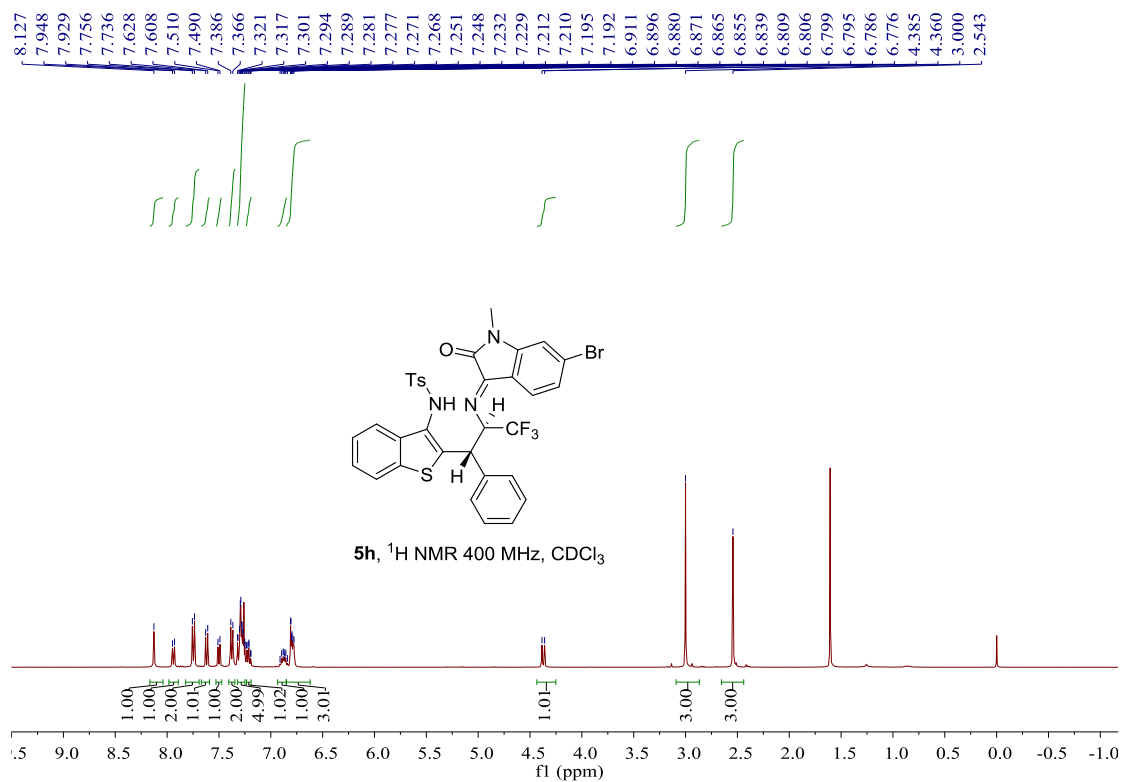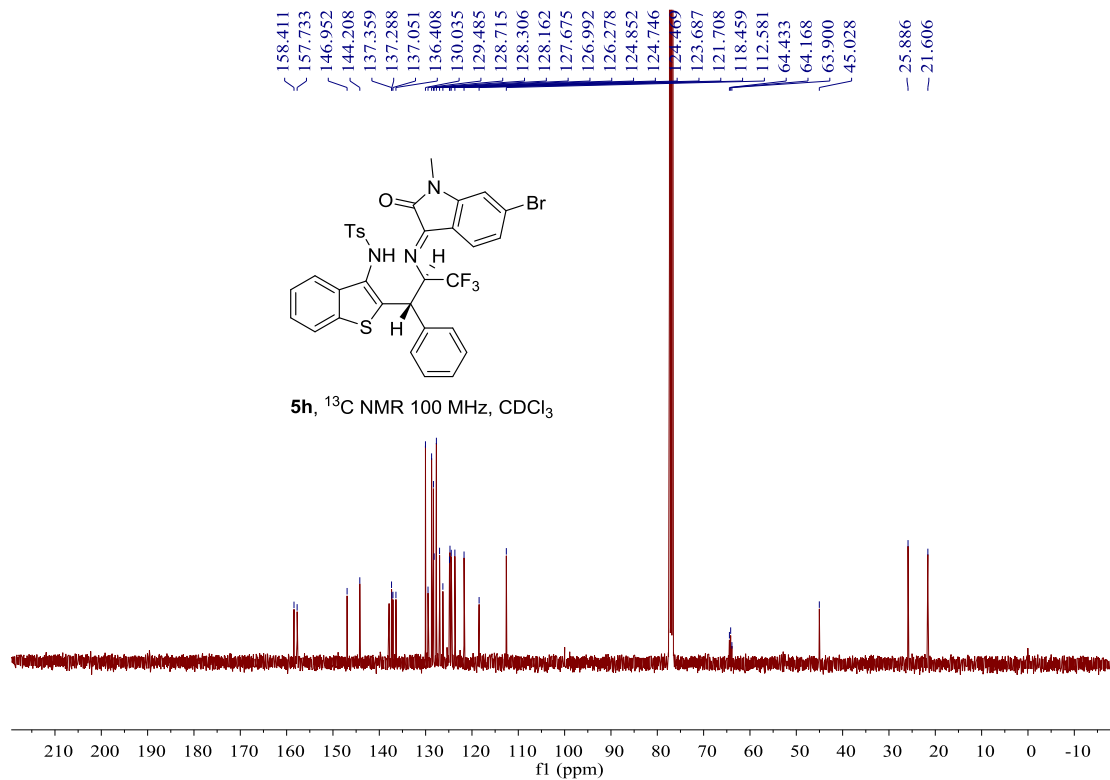

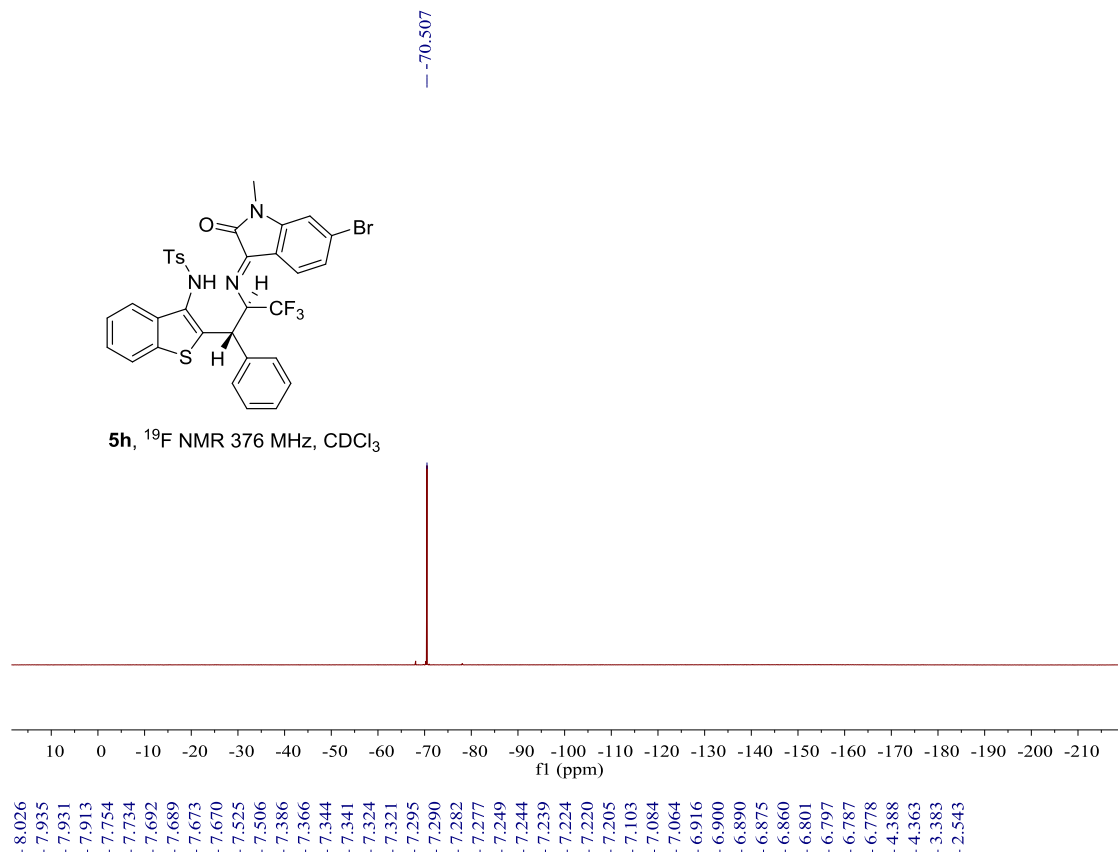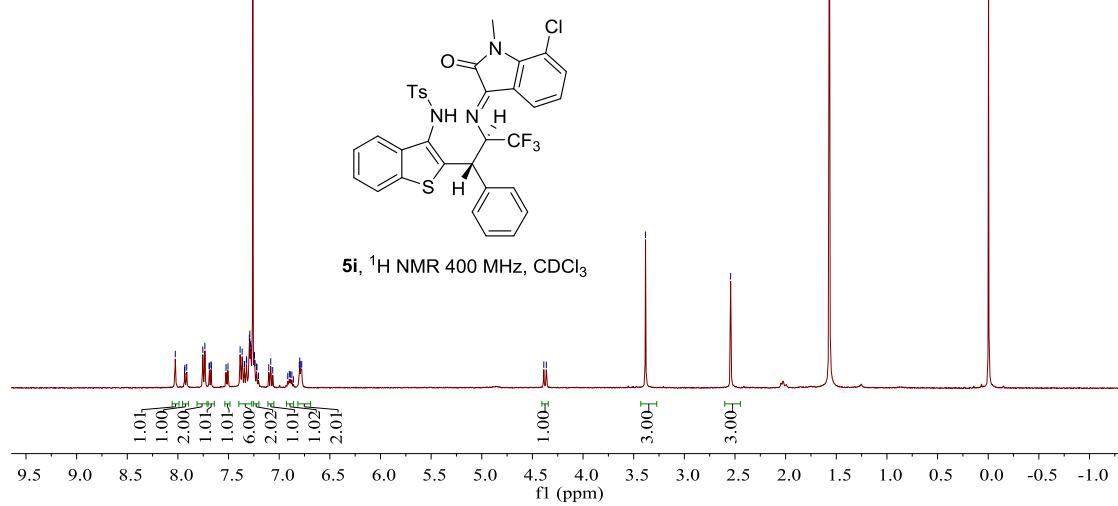

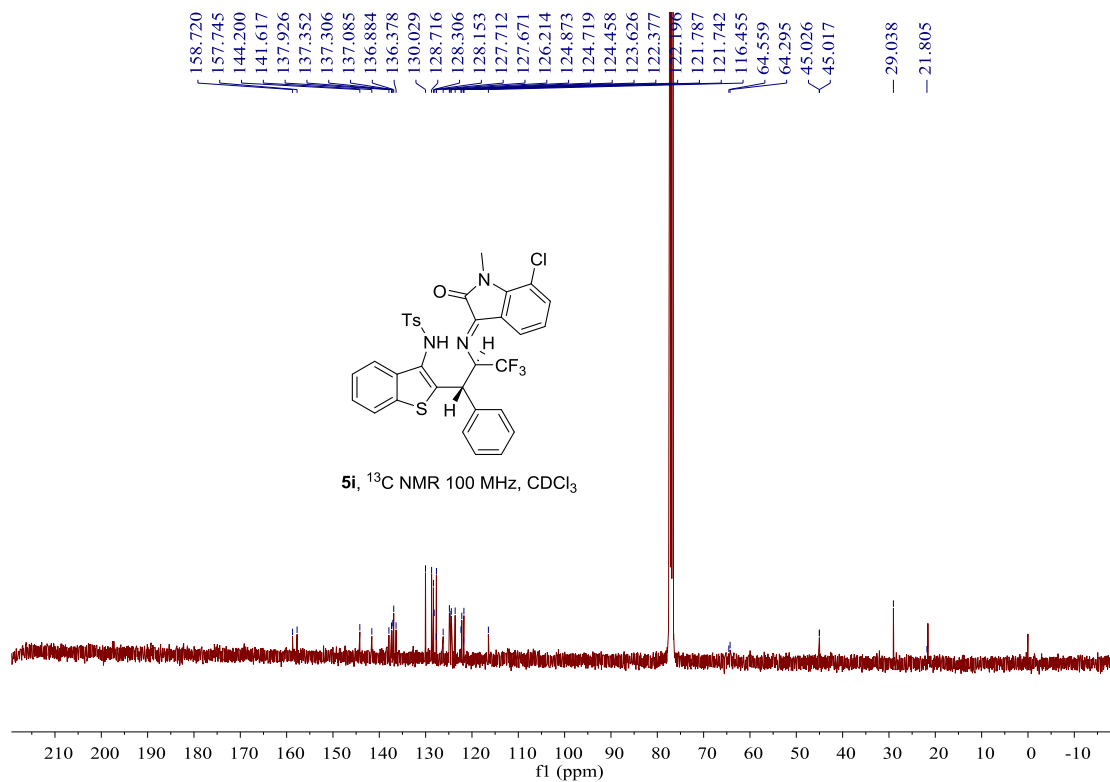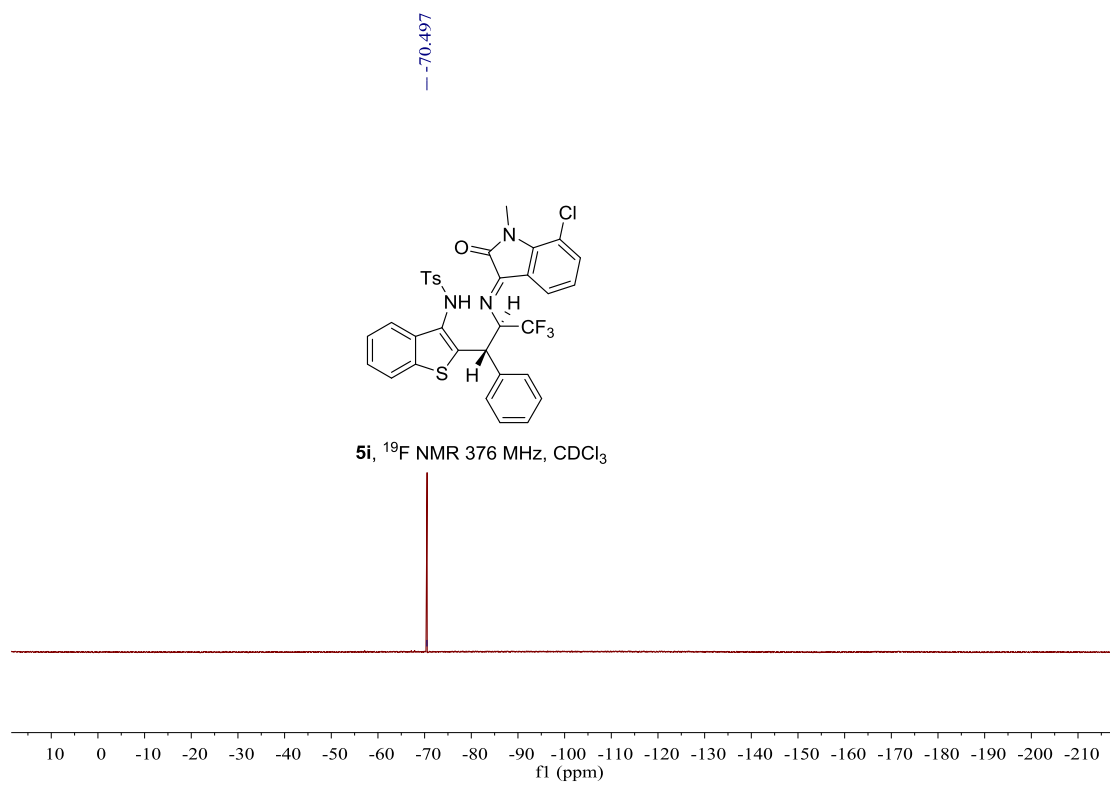

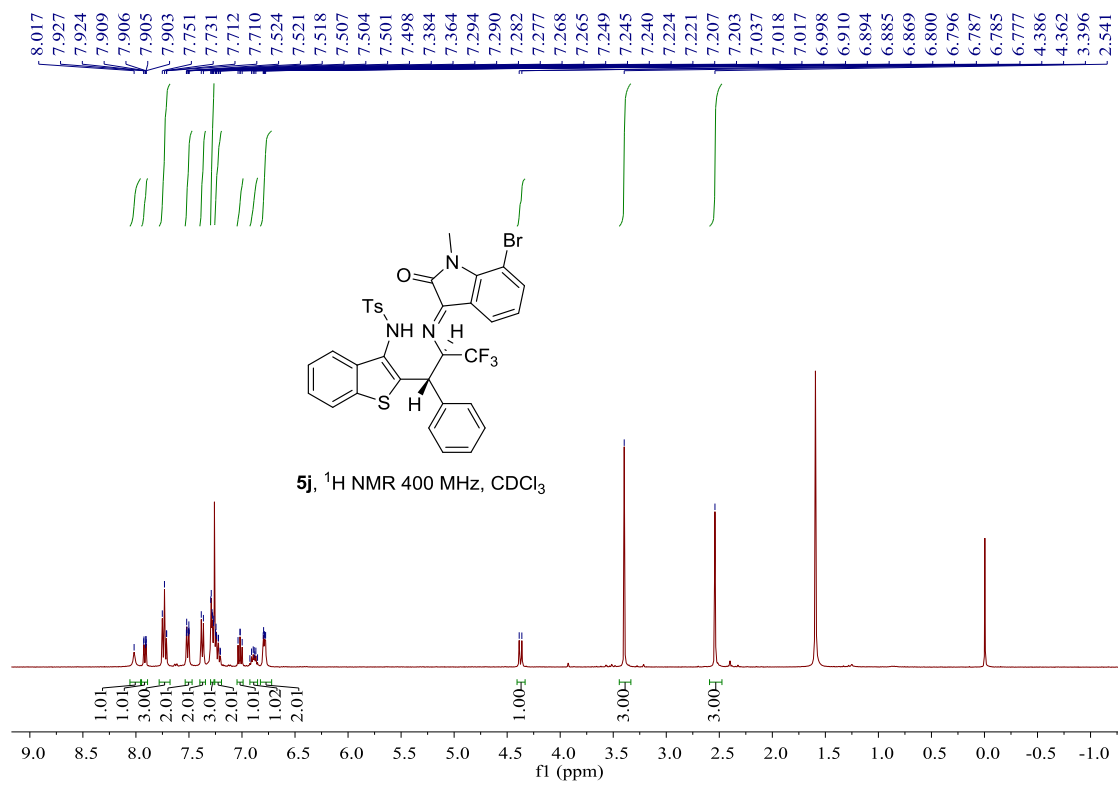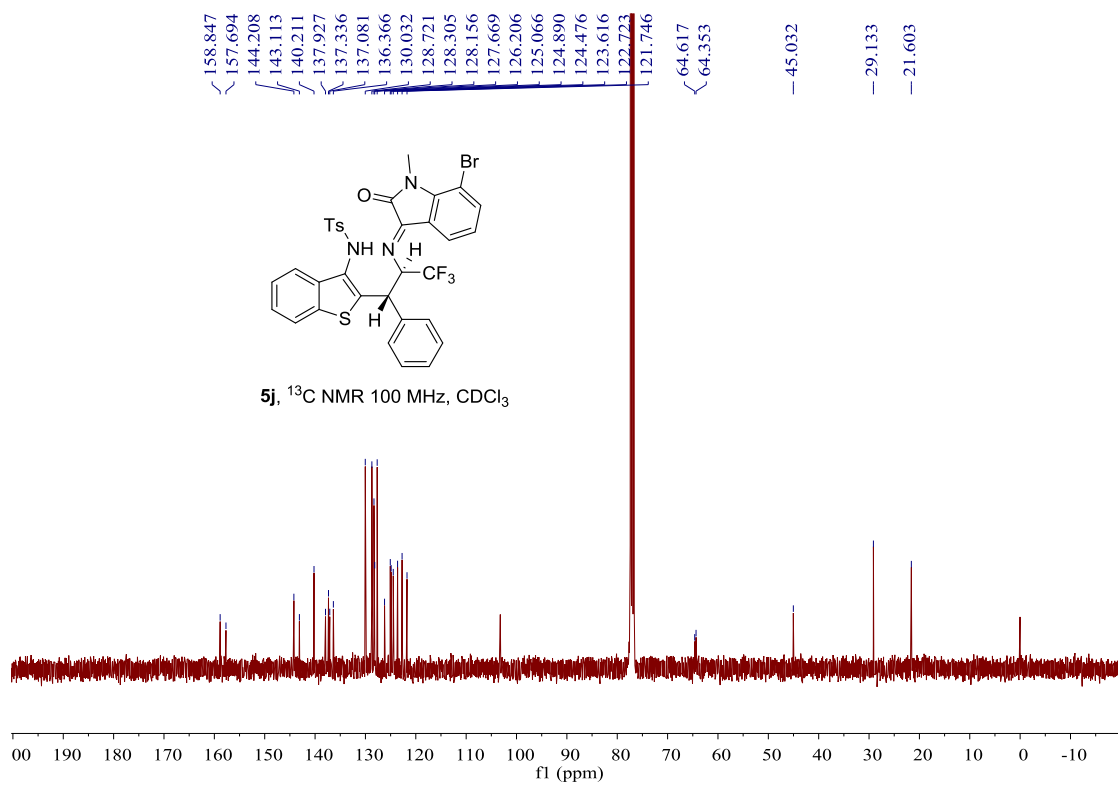

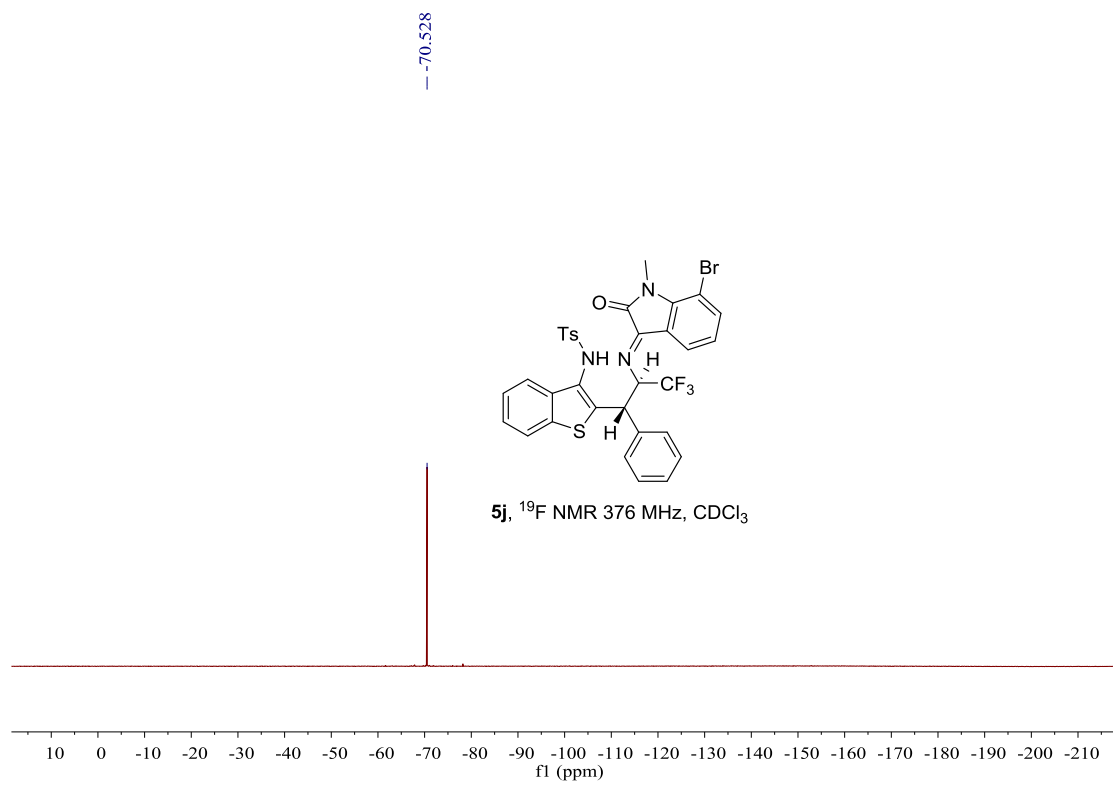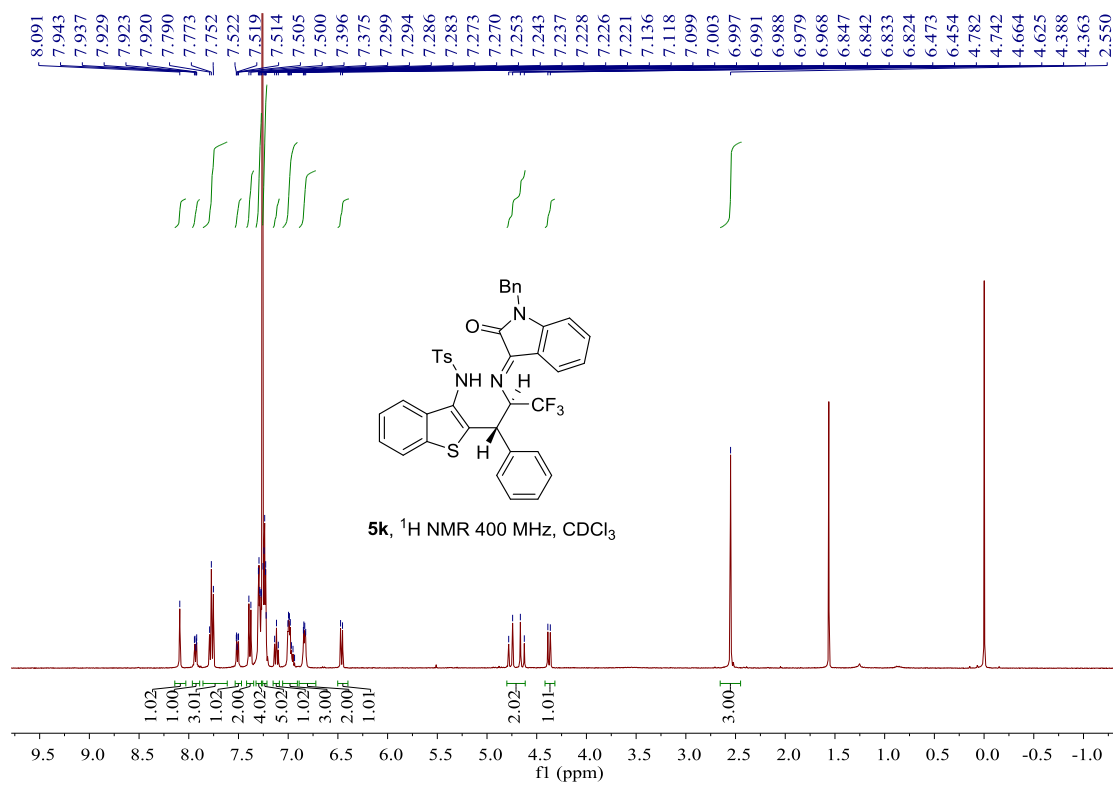

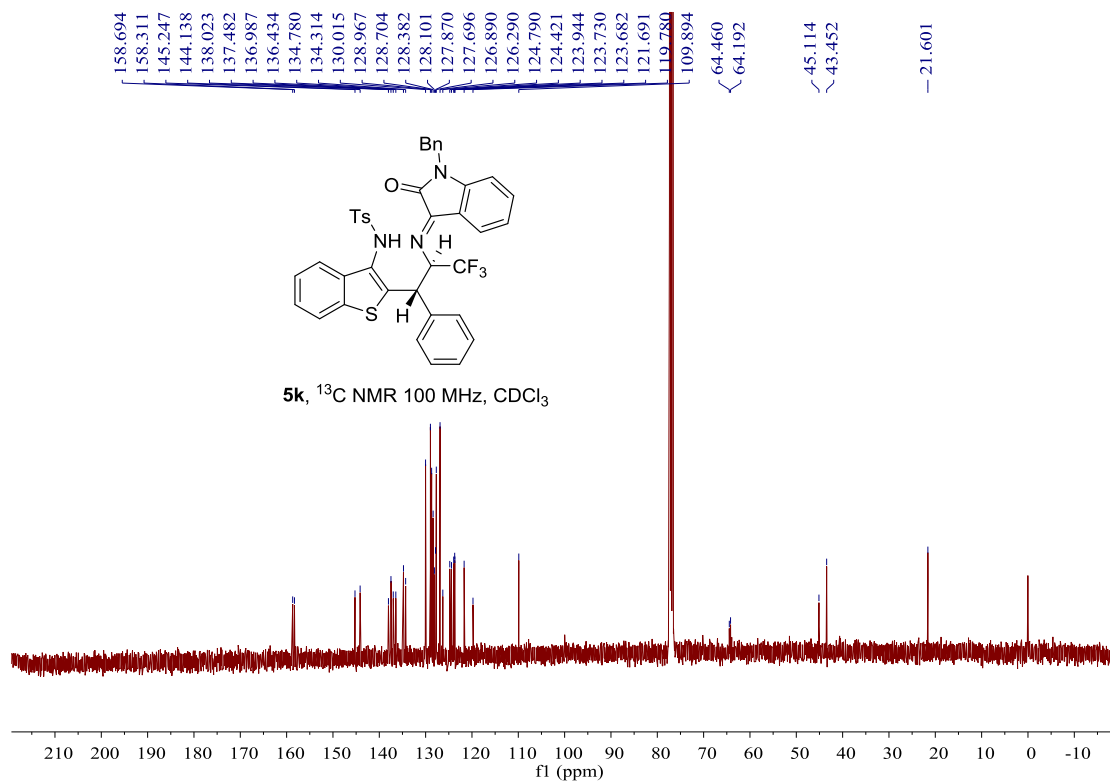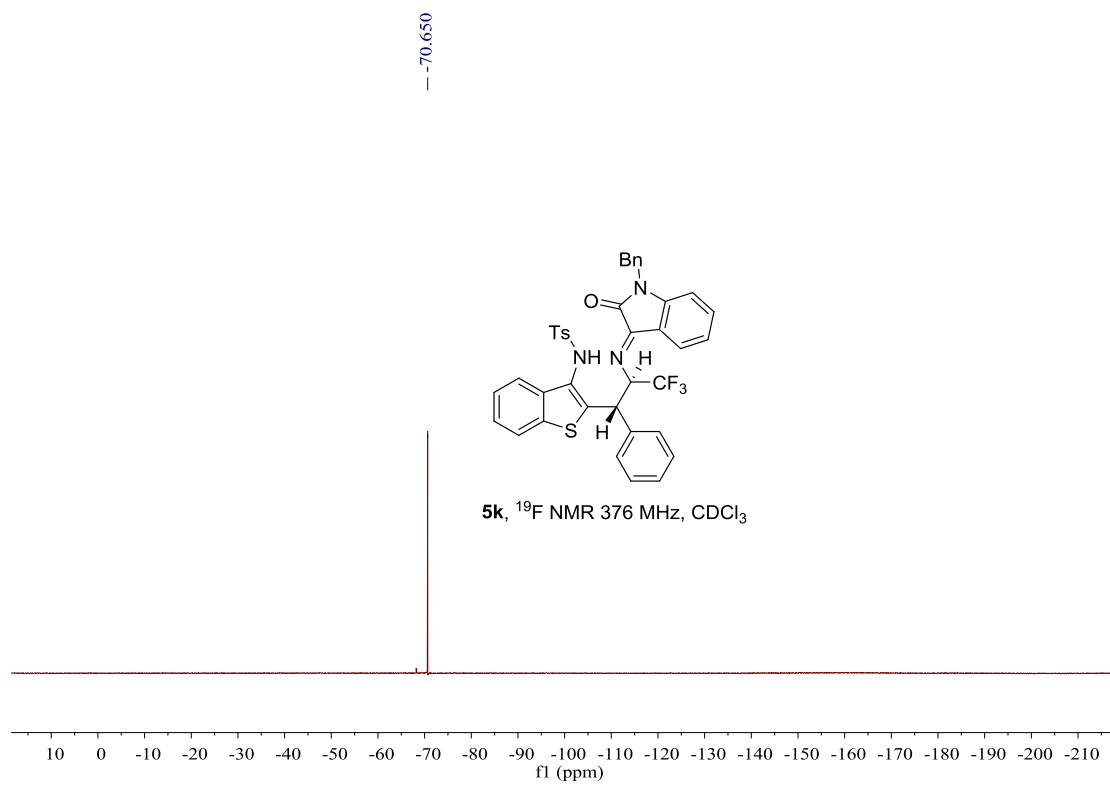

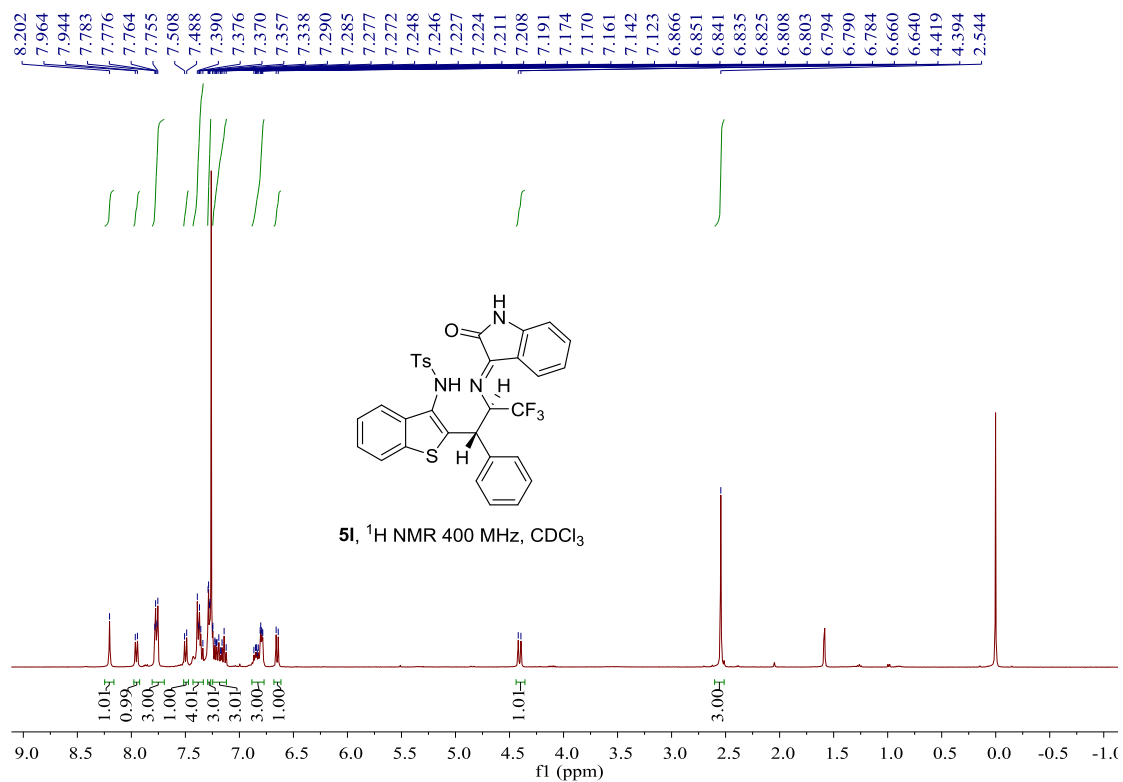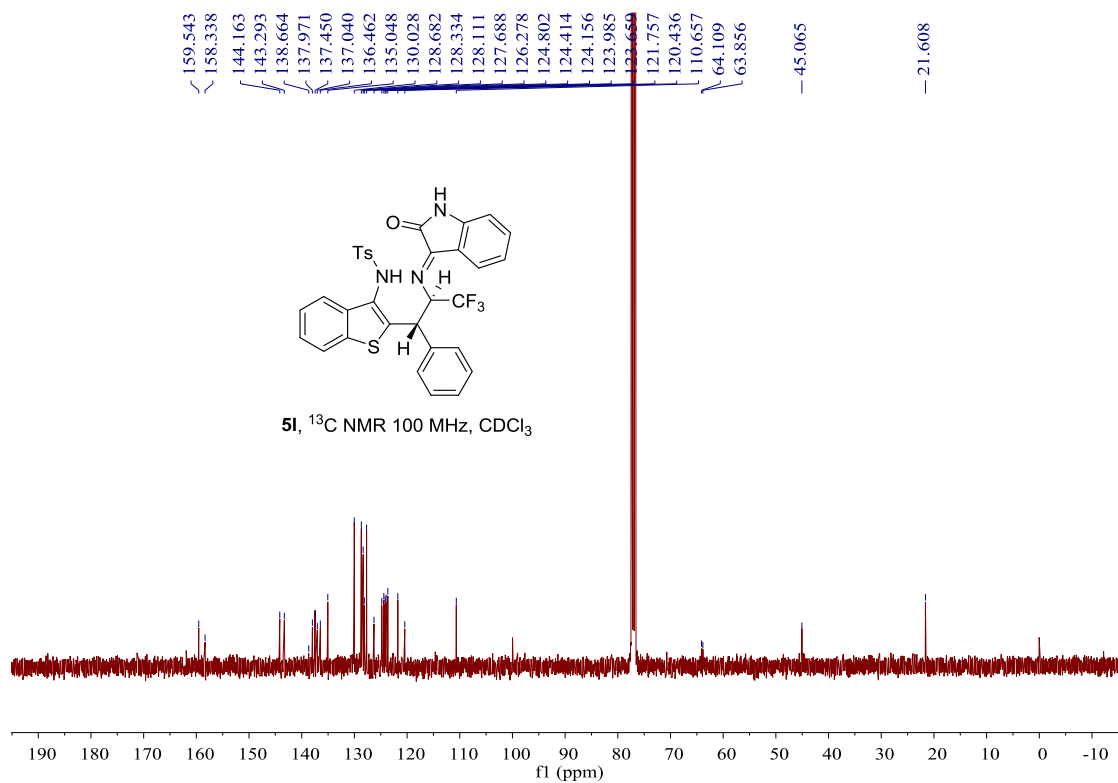

-70.762

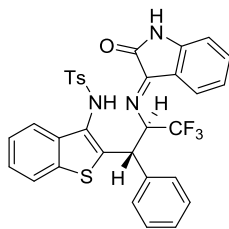

5l, <sup>19</sup>F NMR 376 MHz, CDCl<sub>3</sub>

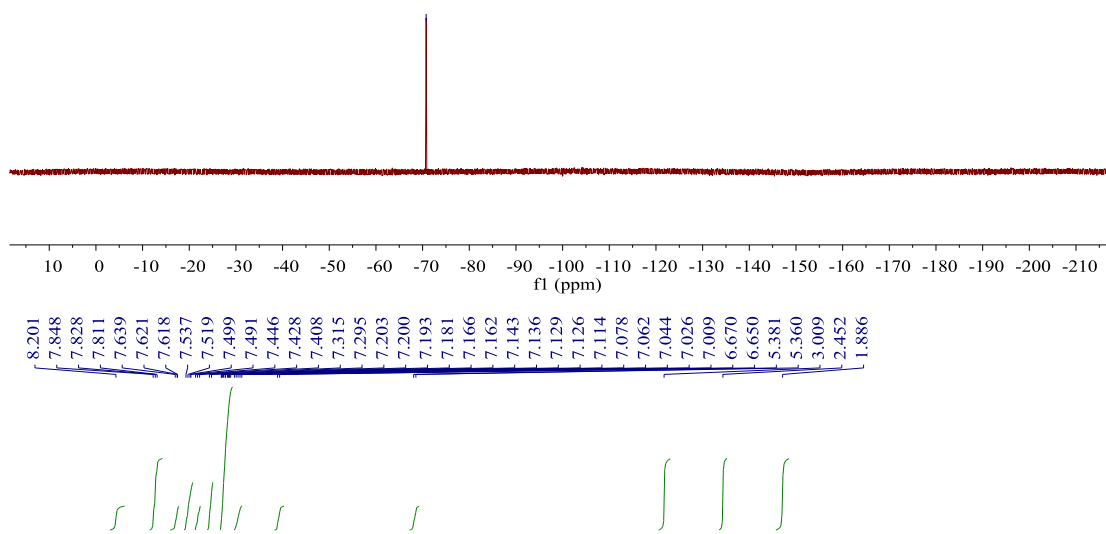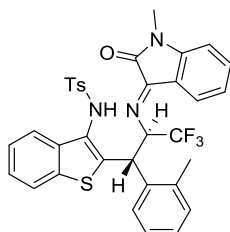

5m, <sup>1</sup>H NMR 400 MHz, CDCl<sub>3</sub>

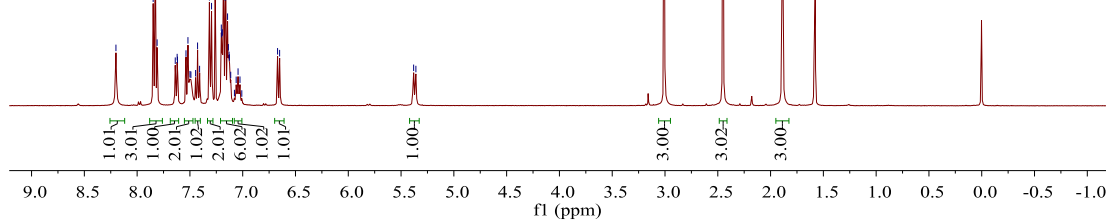



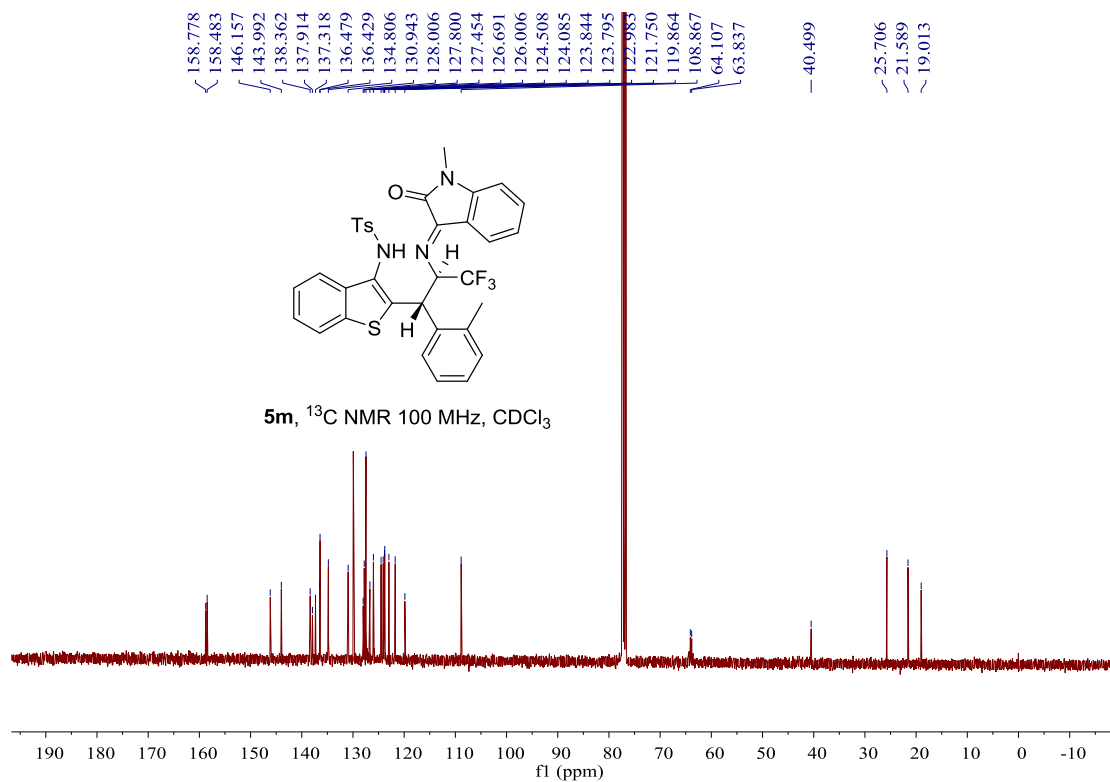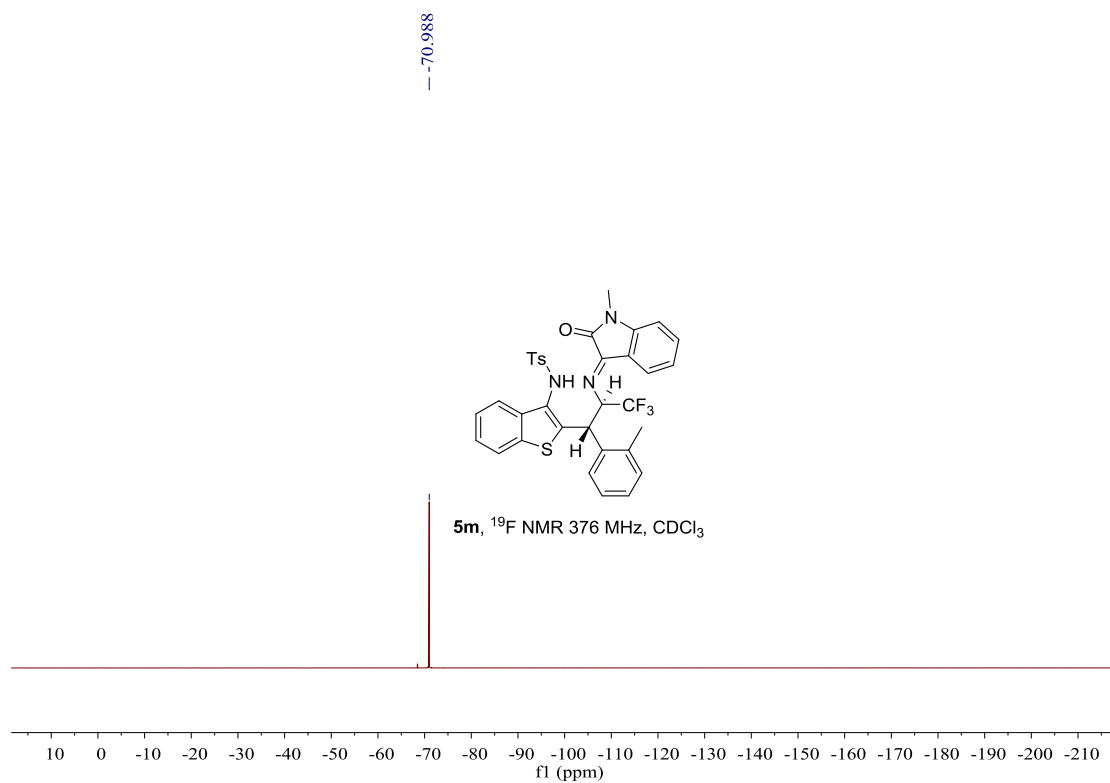

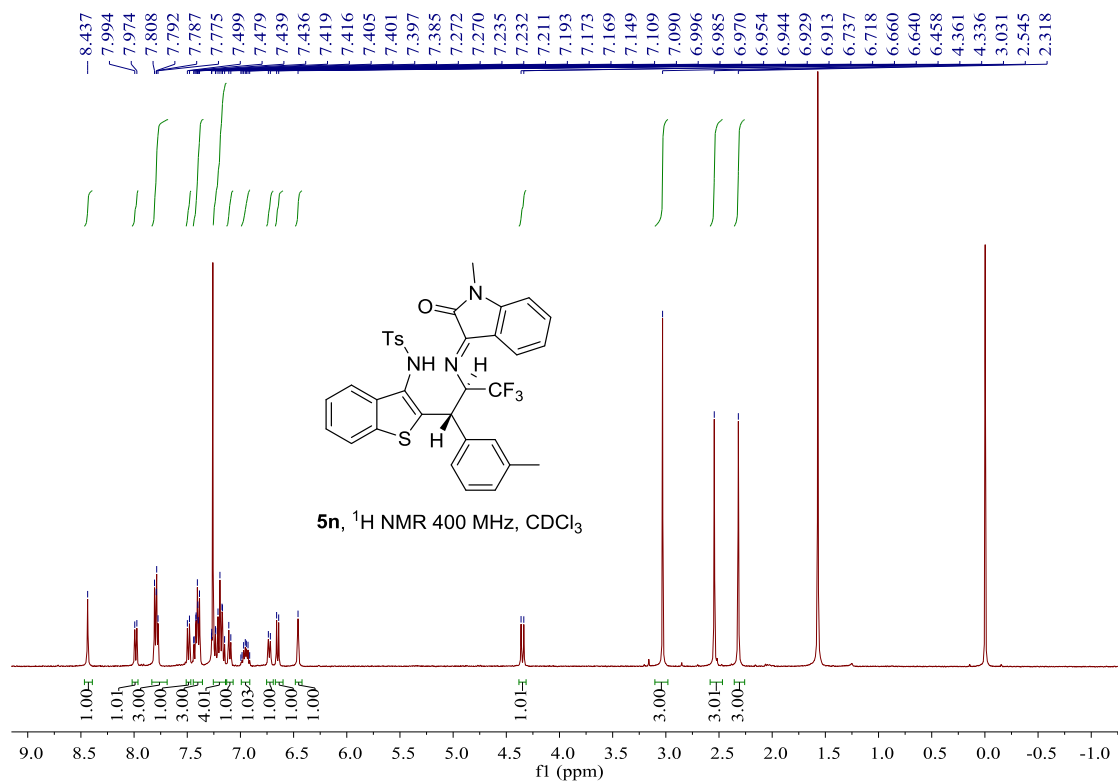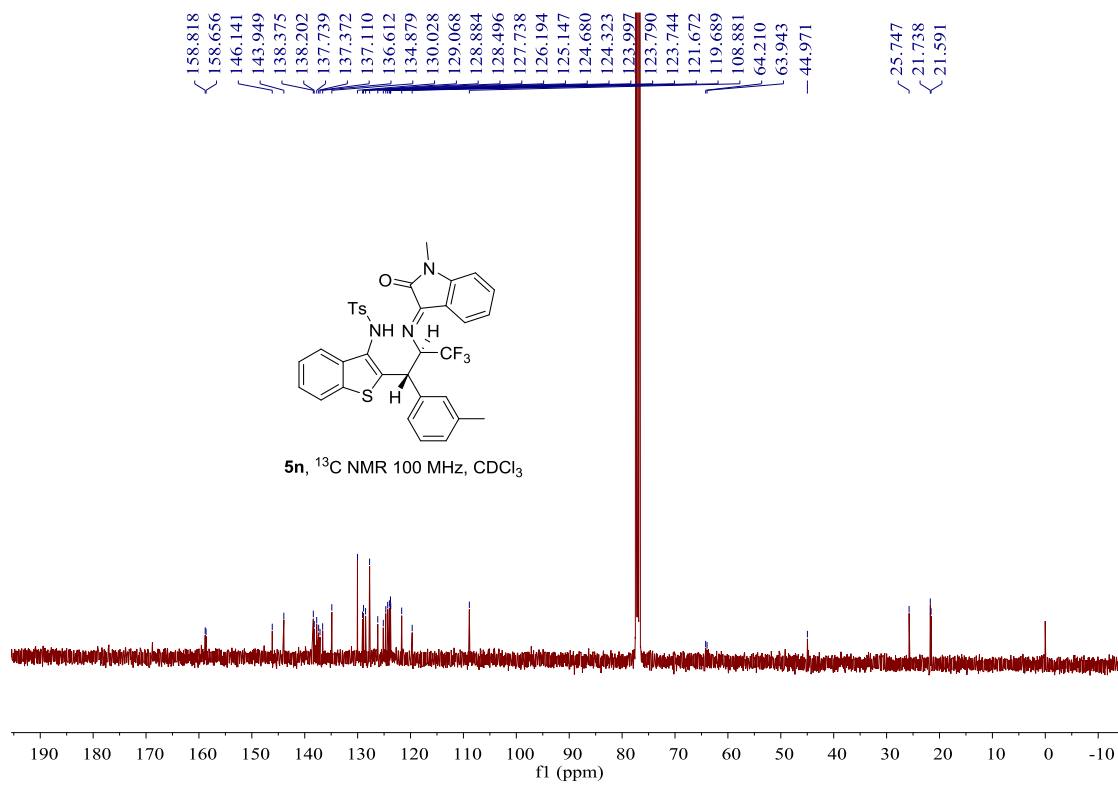

-70.372

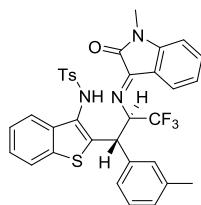

5n,  $^{19}\text{F}$  NMR 376 MHz,  $\text{CDCl}_3$

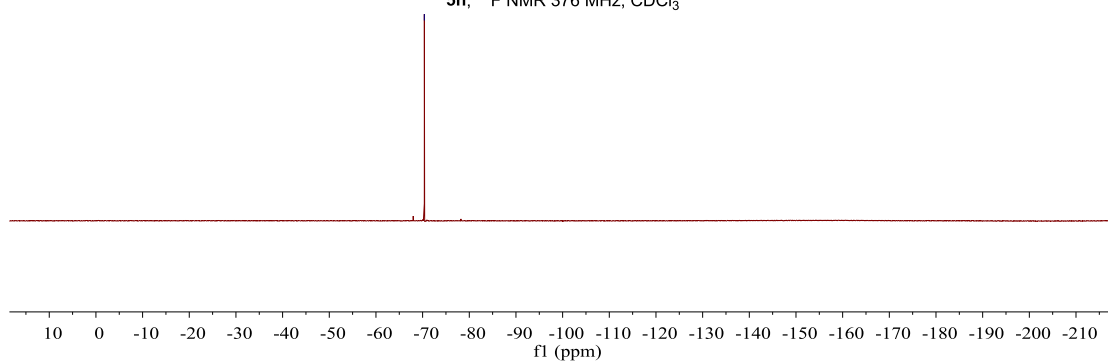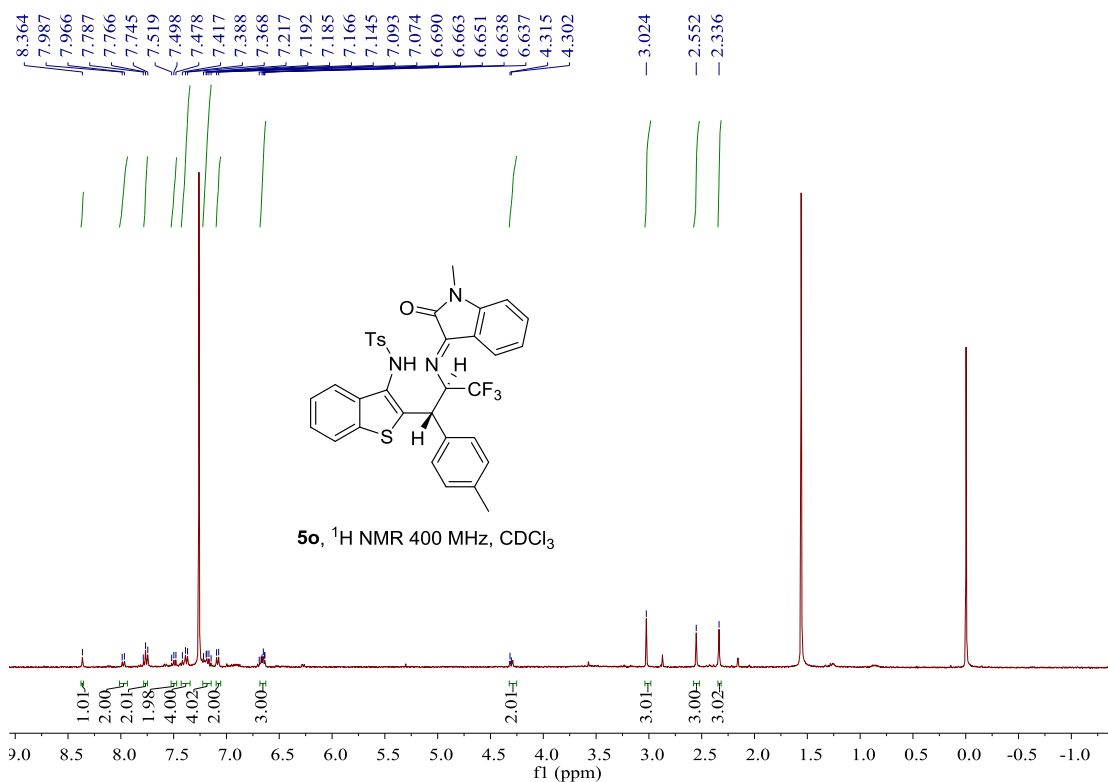

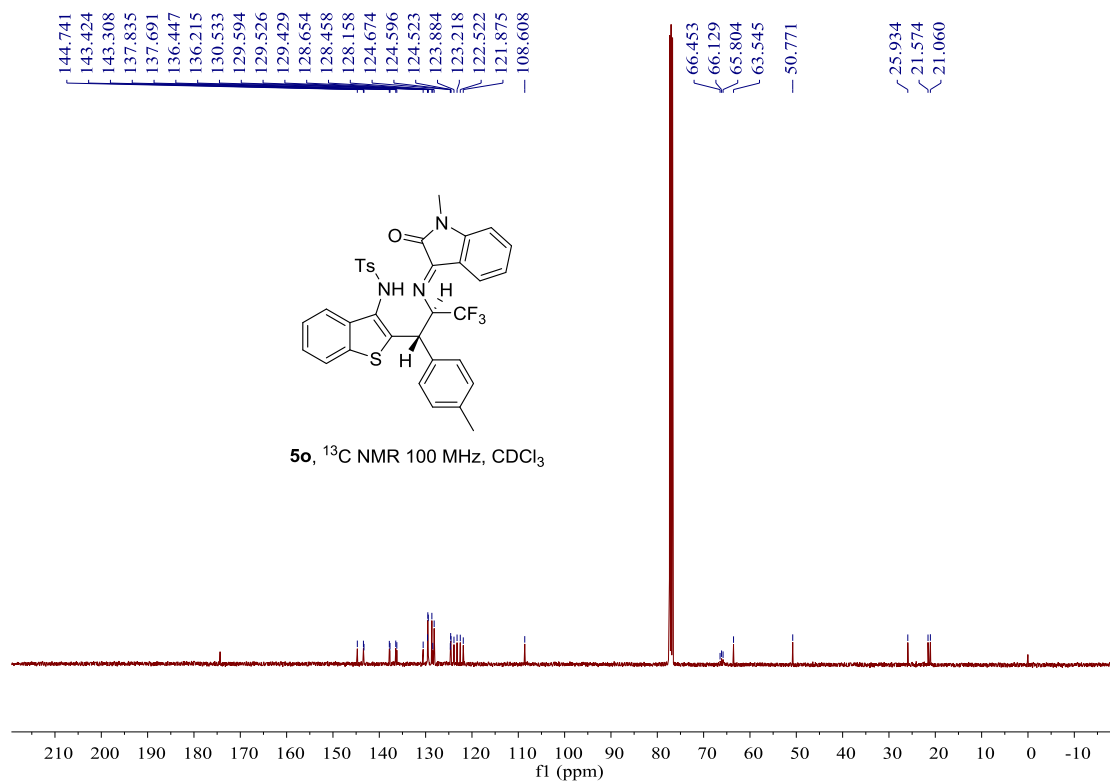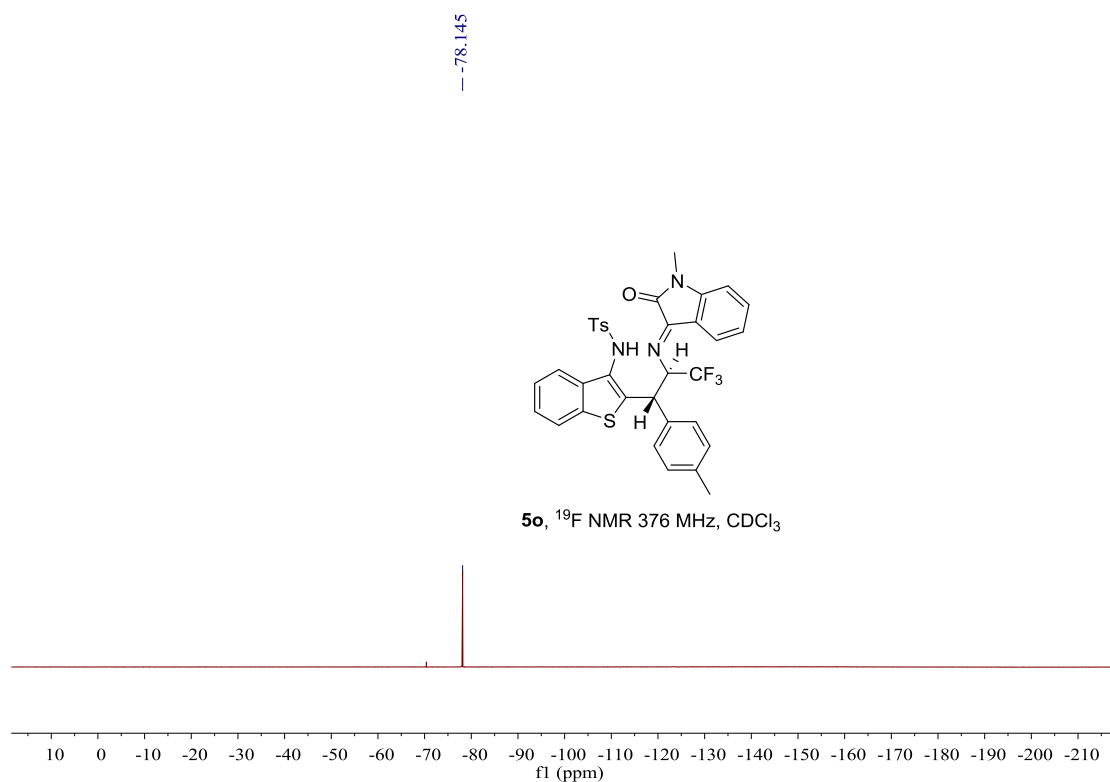

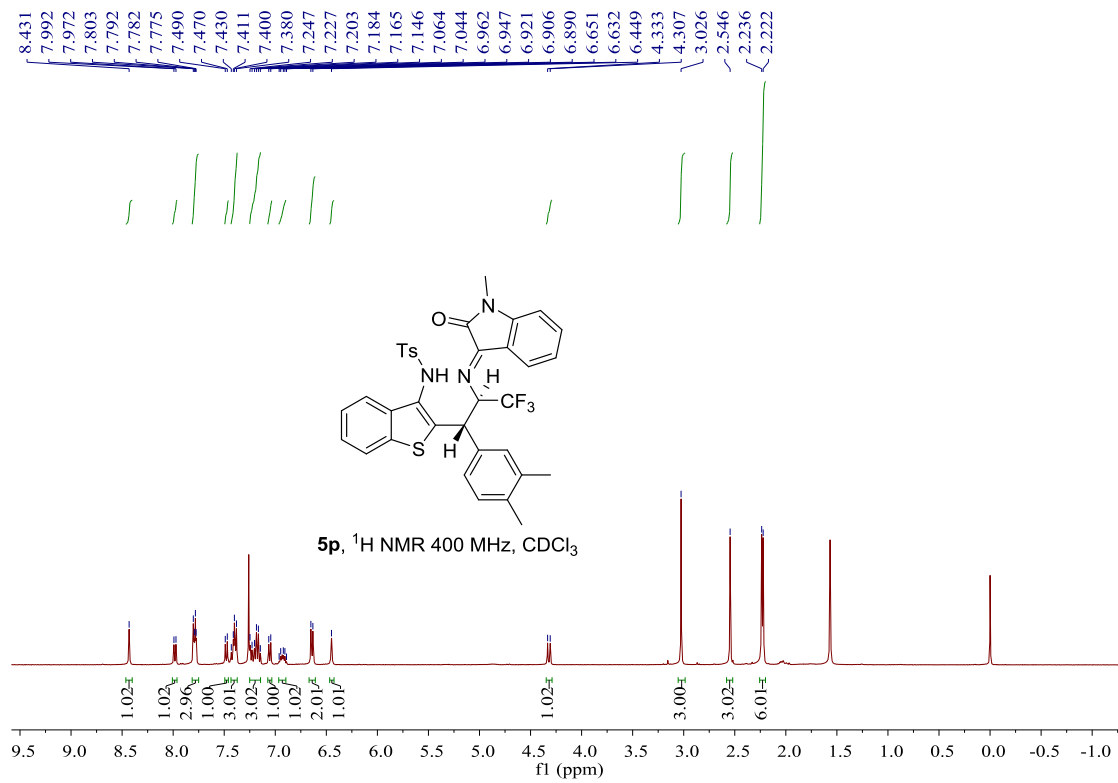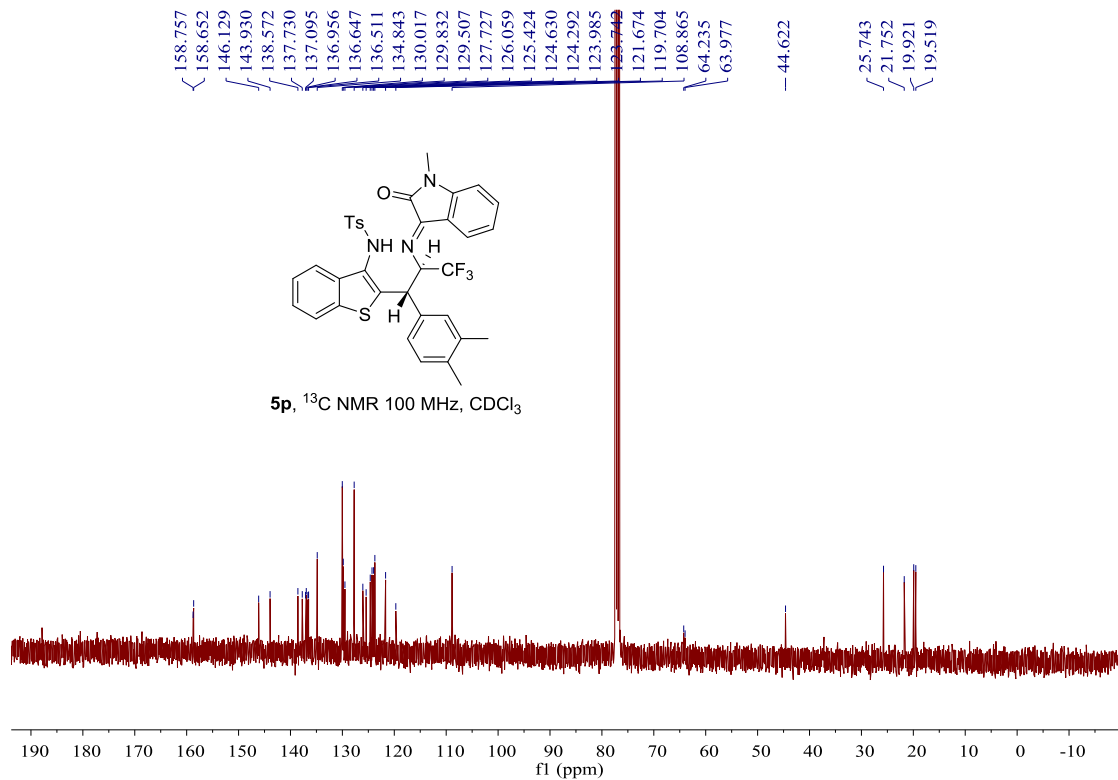

-70.306

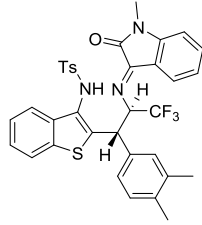

5p, <sup>19</sup>F NMR 376 MHz, CDCl<sub>3</sub>

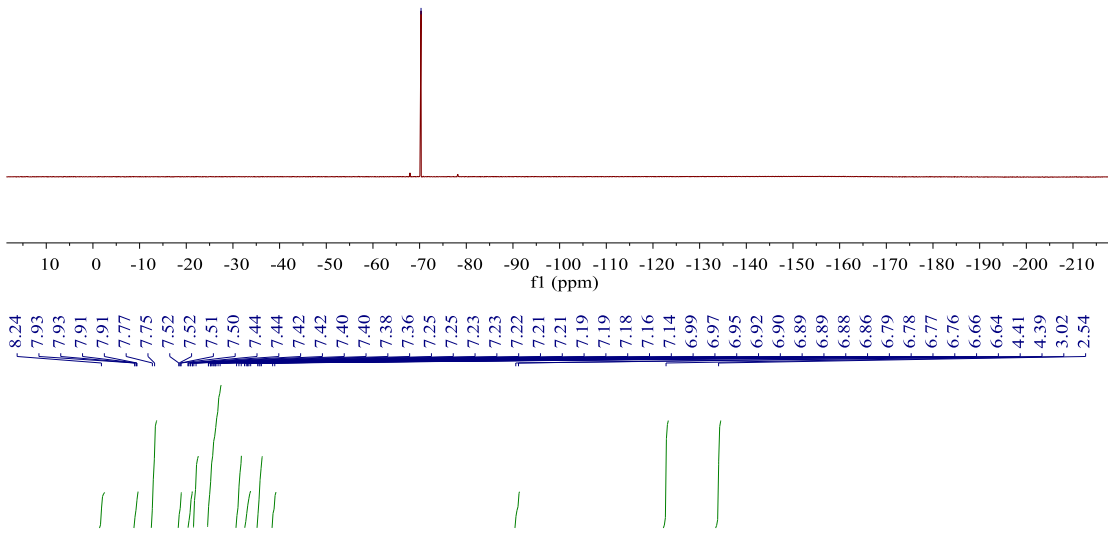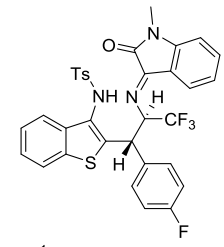

5q, <sup>1</sup>H NMR 400 MHz, CDCl<sub>3</sub>

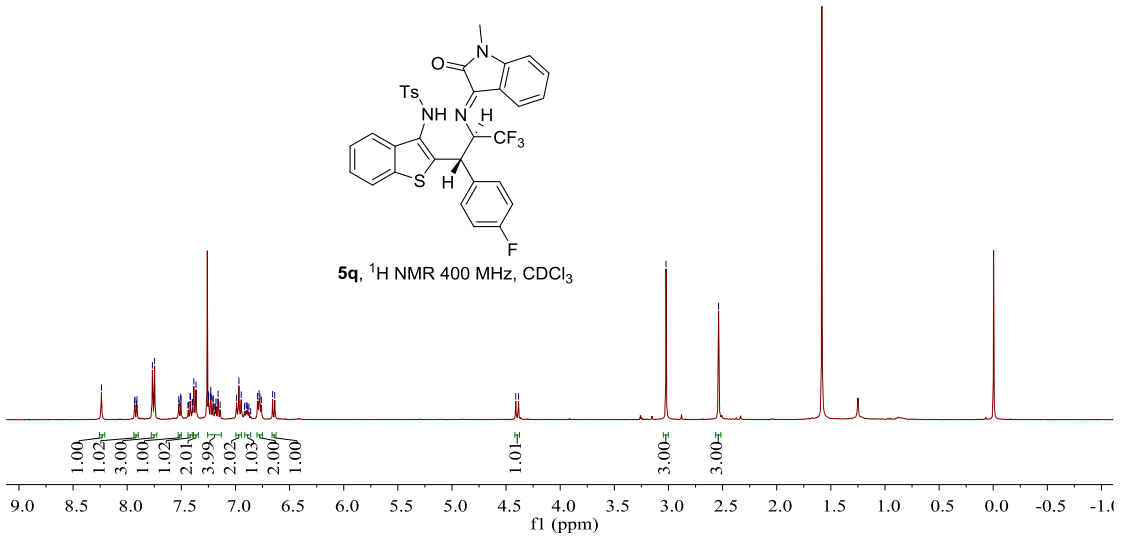

13C.126.fid

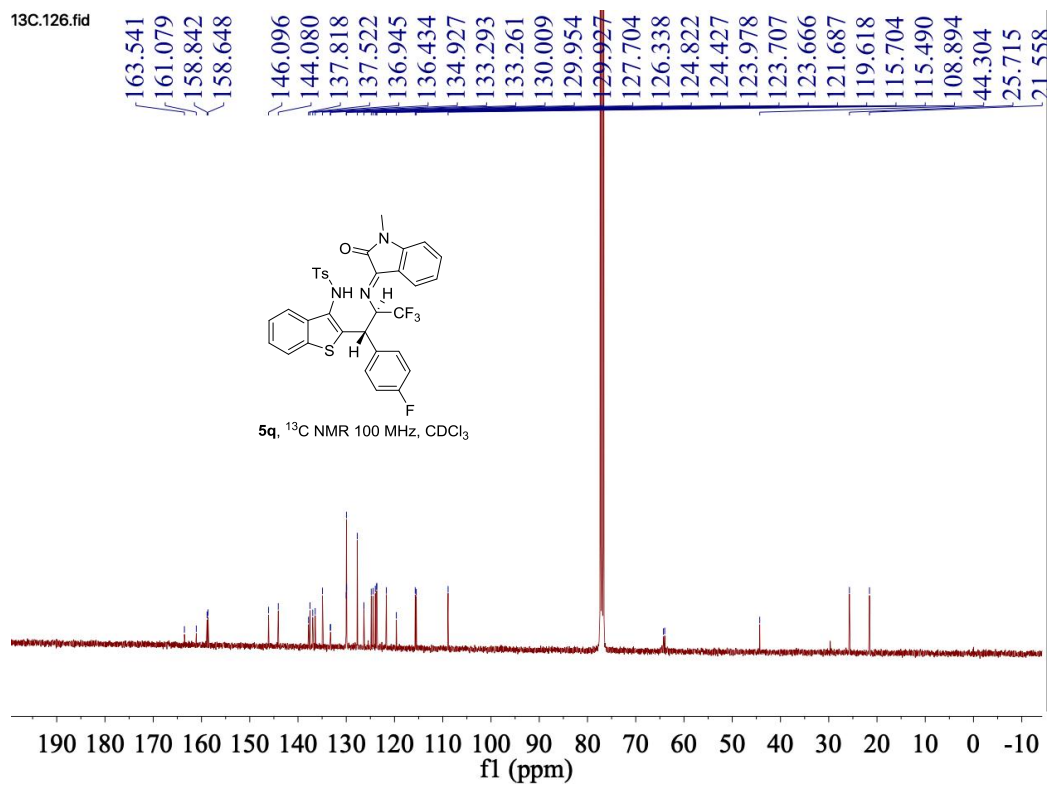

--70.43  
--113.64

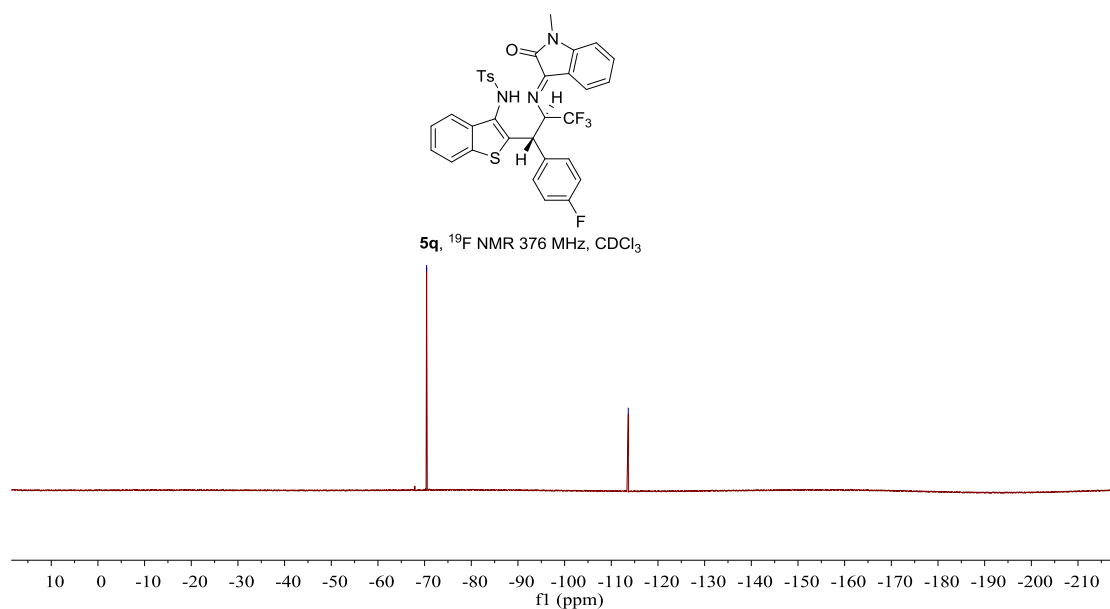

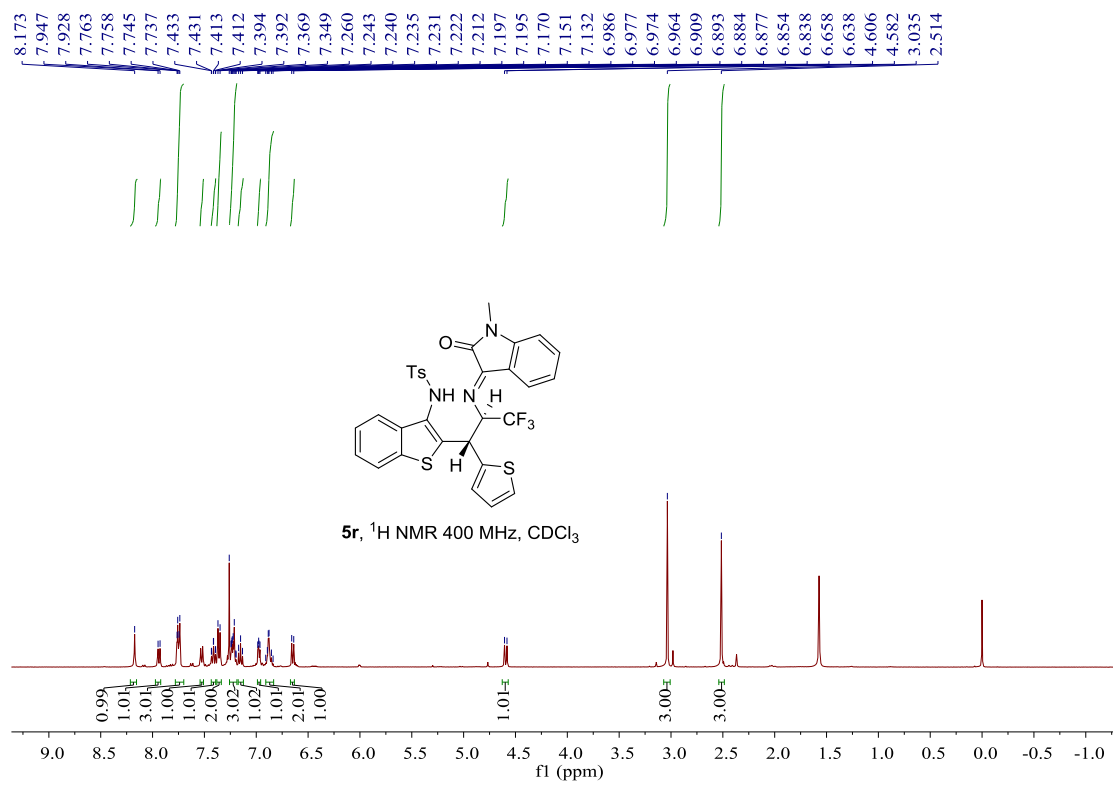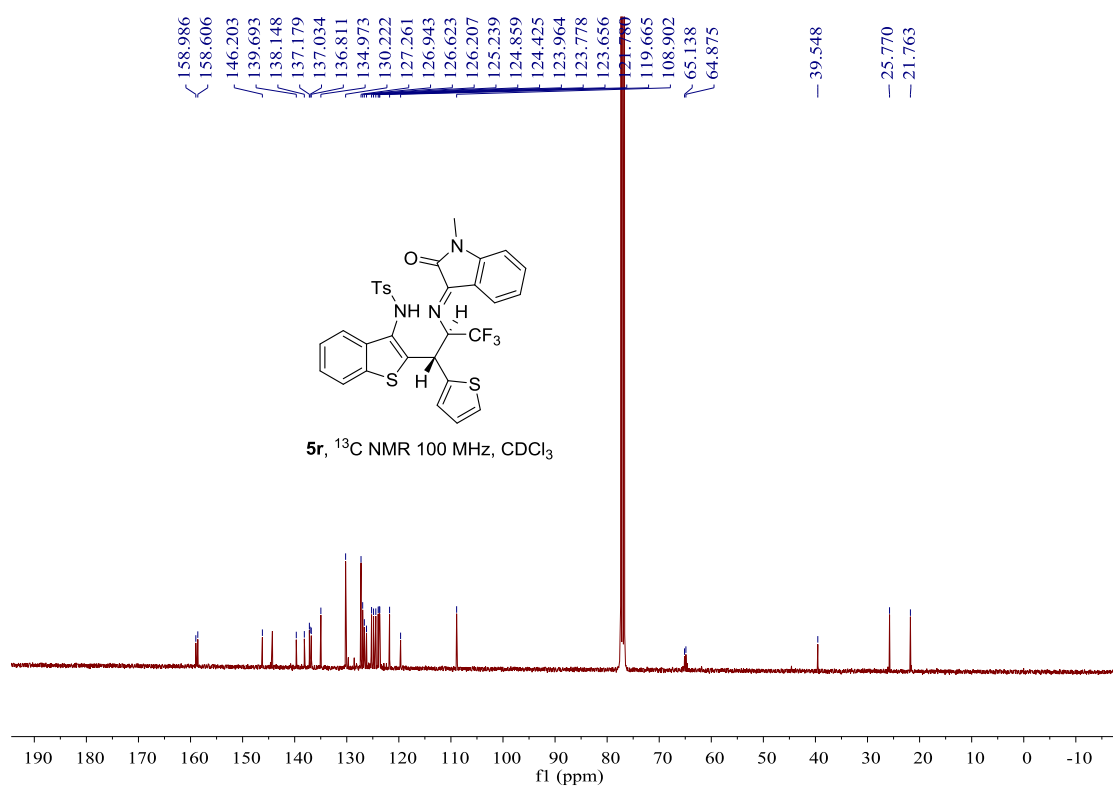



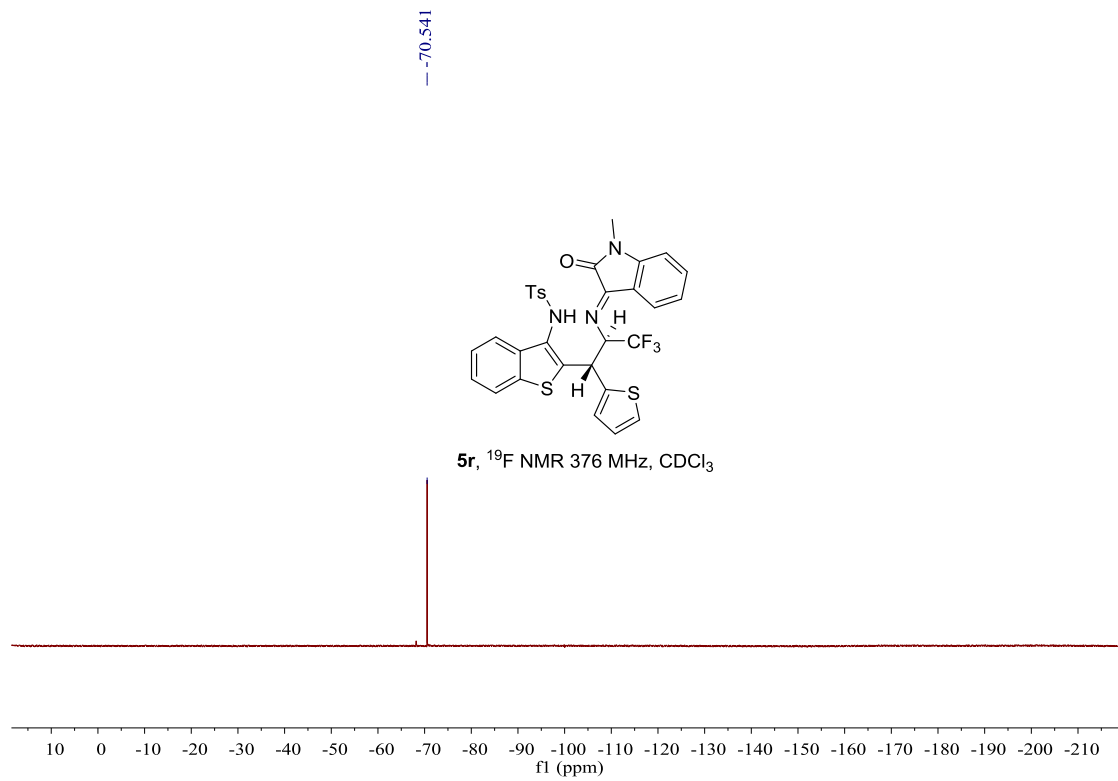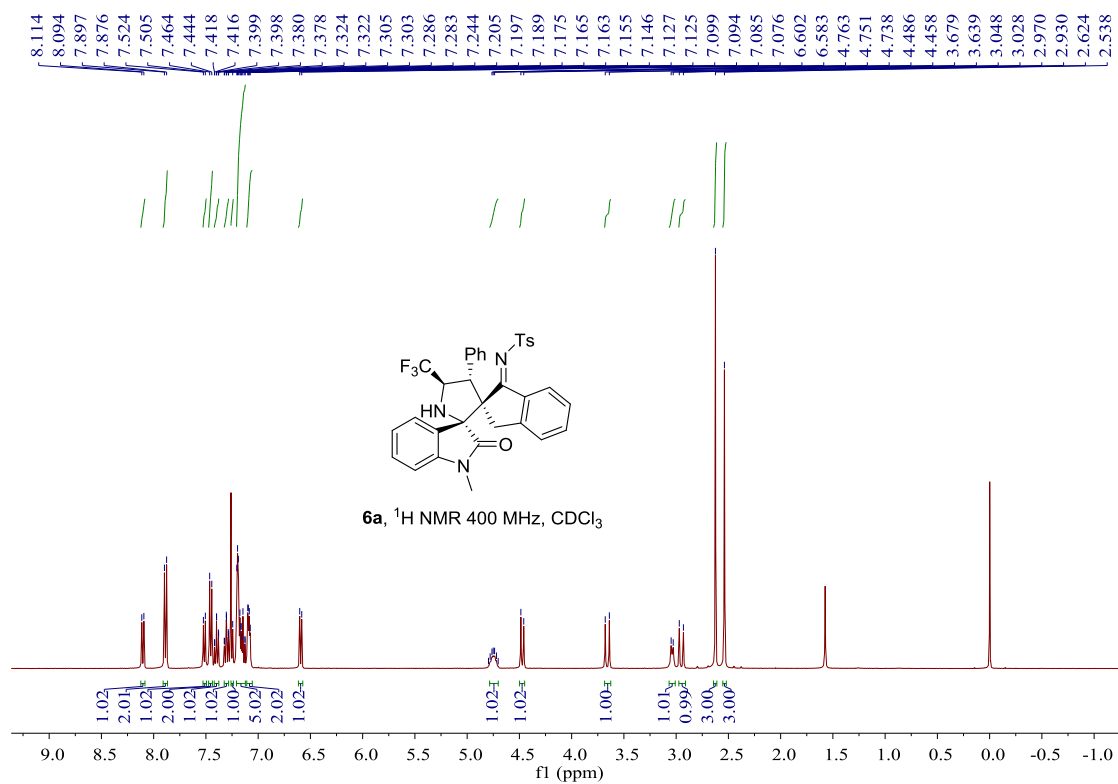

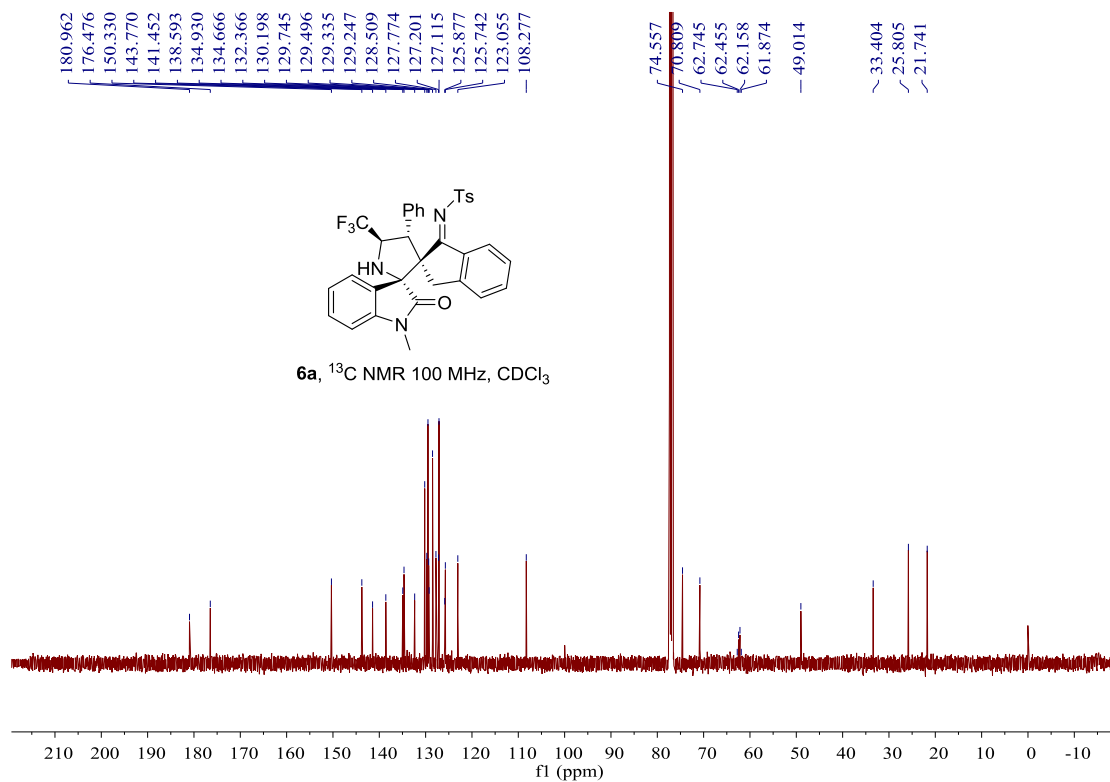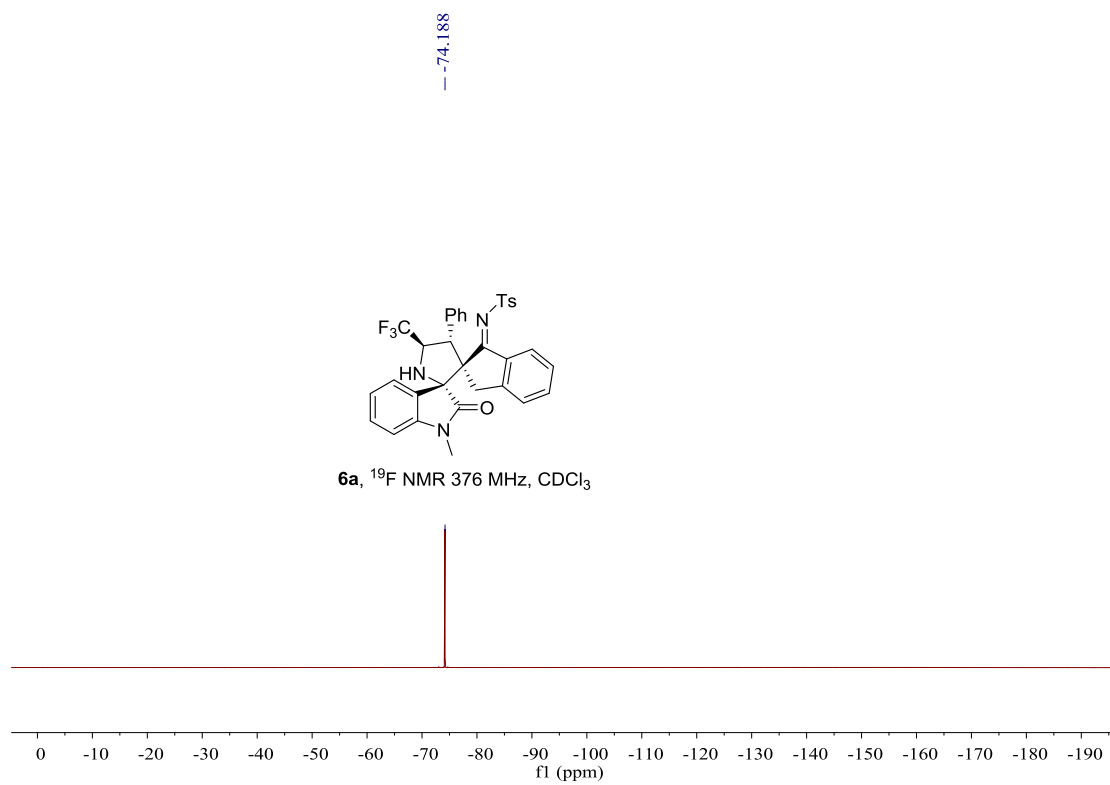

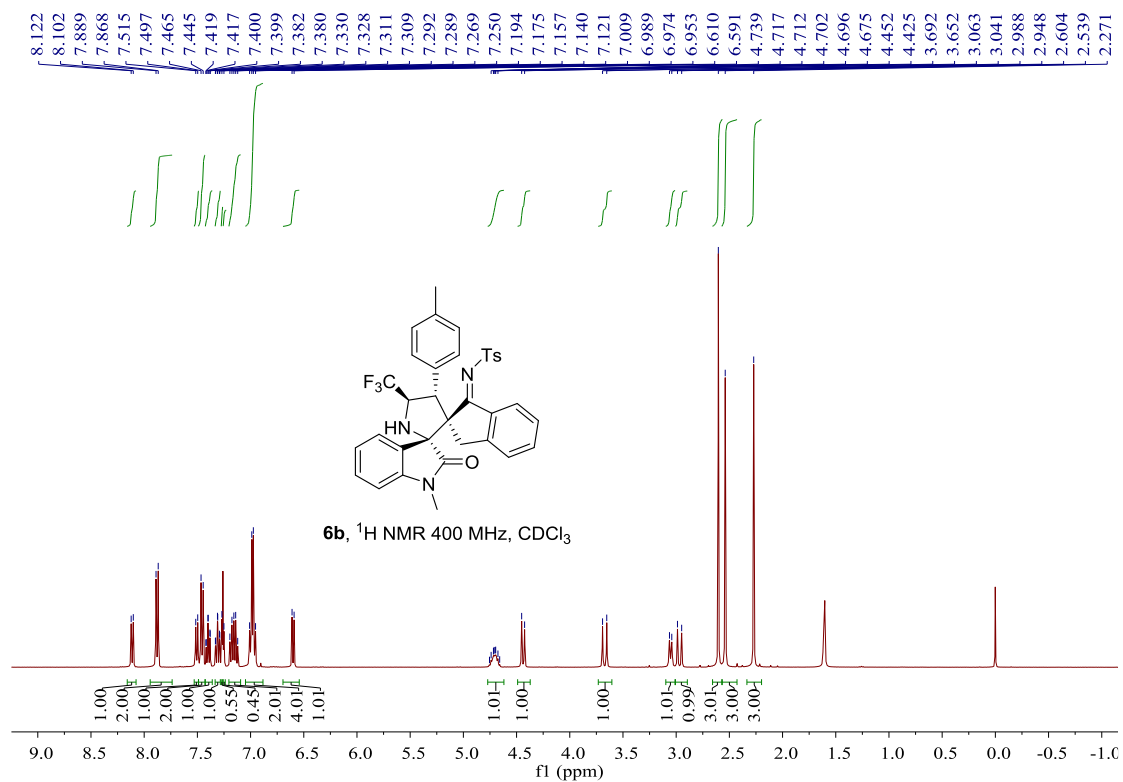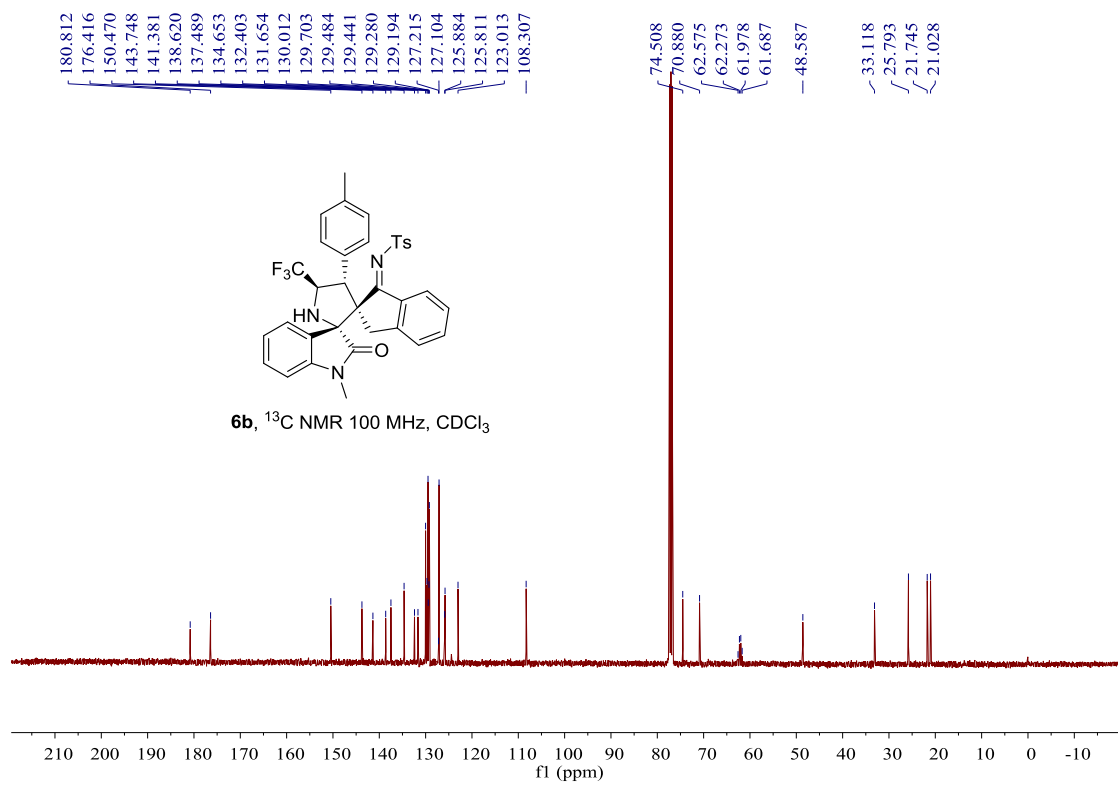

-74.123

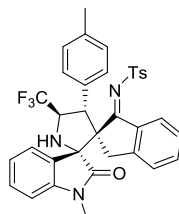

**6b**,  $^{19}\text{F}$  NMR 376 MHz,  $\text{CDCl}_3$

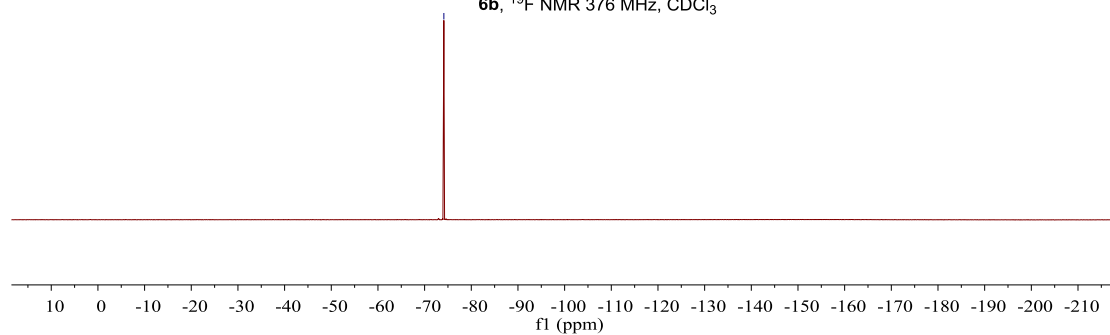

8.122  
8.103  
7.897  
7.876  
7.509  
7.491  
7.466  
7.446  
7.422  
7.420  
7.403  
7.402  
7.385  
7.383  
7.312  
7.310  
7.293  
7.290  
7.273  
7.271  
7.253  
7.233  
7.199  
7.180  
7.158  
7.137  
7.120  
7.118  
7.092  
7.079  
7.071  
7.057  
6.909  
6.888  
6.866  
6.596  
6.577  
4.708  
4.693  
4.461  
4.434  
3.619  
3.580  
3.020  
2.999  
2.903  
2.864  
2.651  
2.537

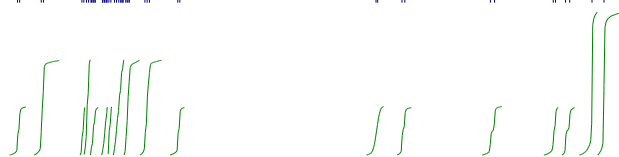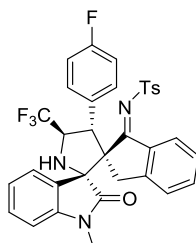

**6c**,  $^1\text{H}$  NMR 400 MHz,  $\text{CDCl}_3$

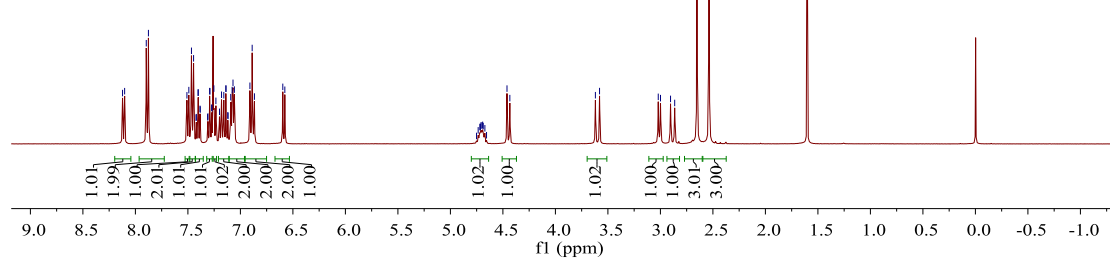

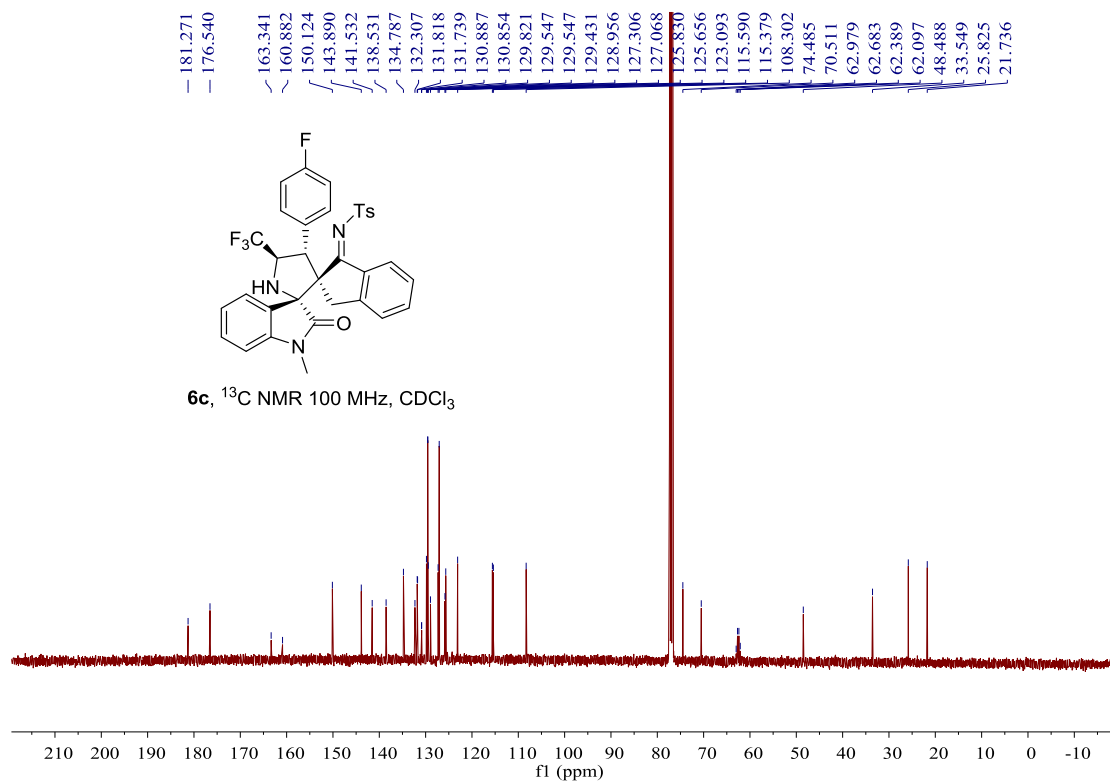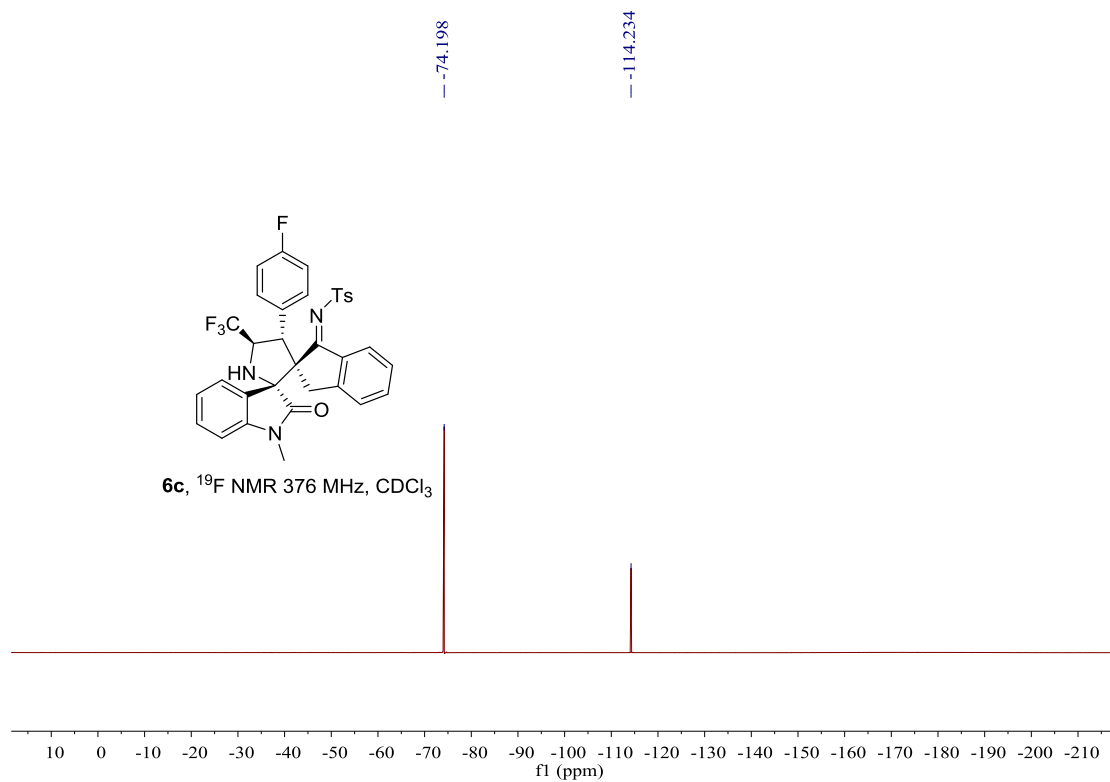

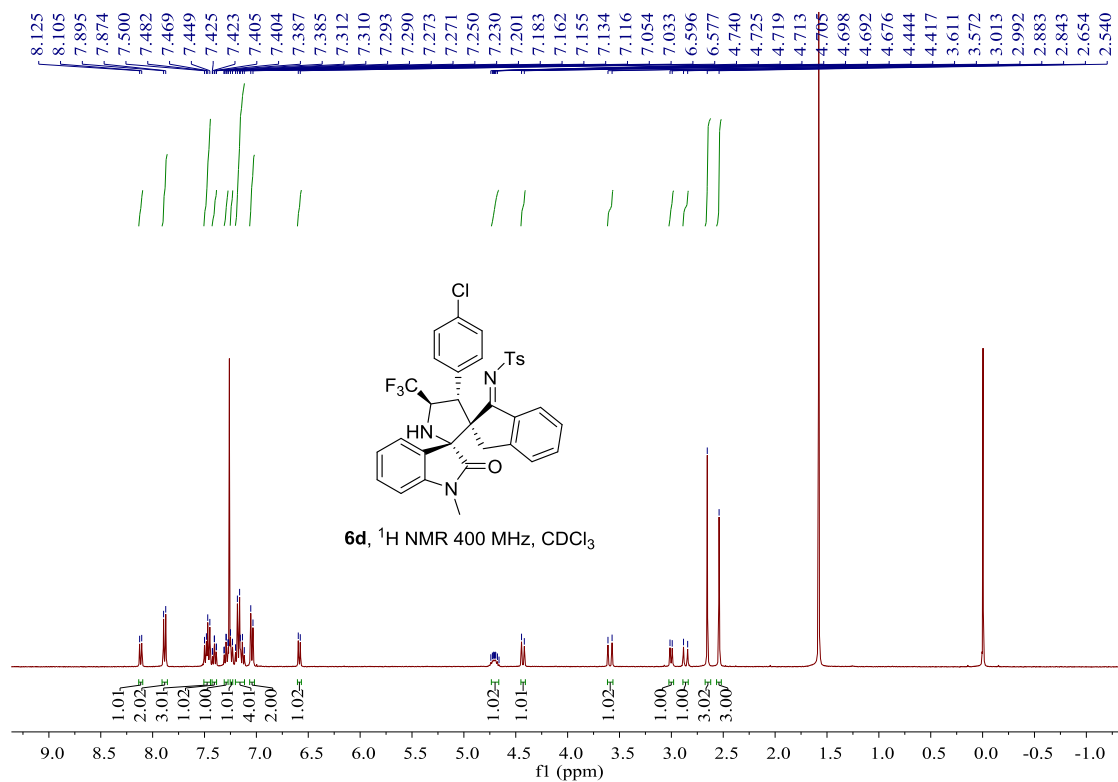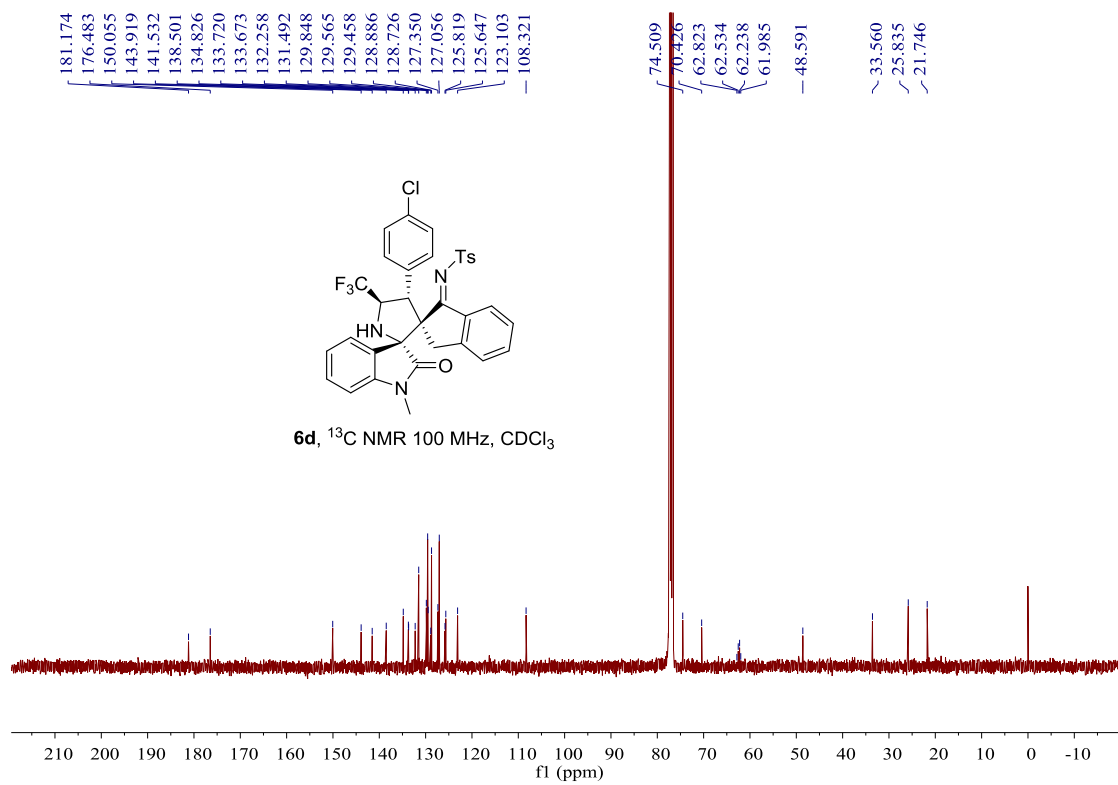

-- 74.212

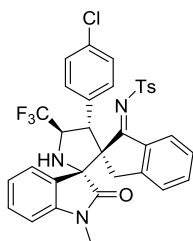

6d, <sup>19</sup>F NMR 376 MHz, CDCl<sub>3</sub>

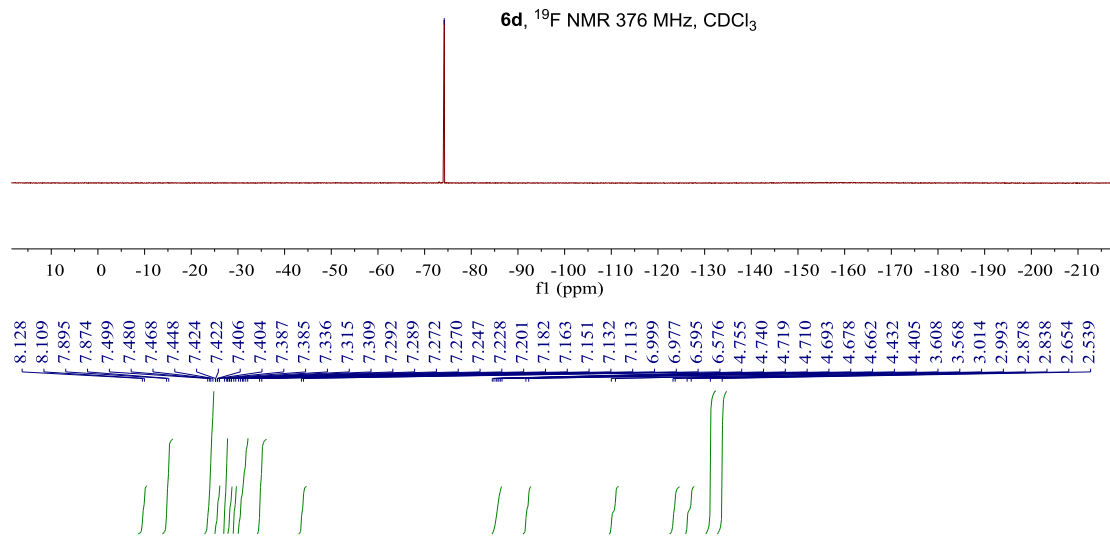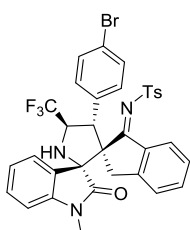

6e, <sup>1</sup>H NMR 400 MHz, CDCl<sub>3</sub>

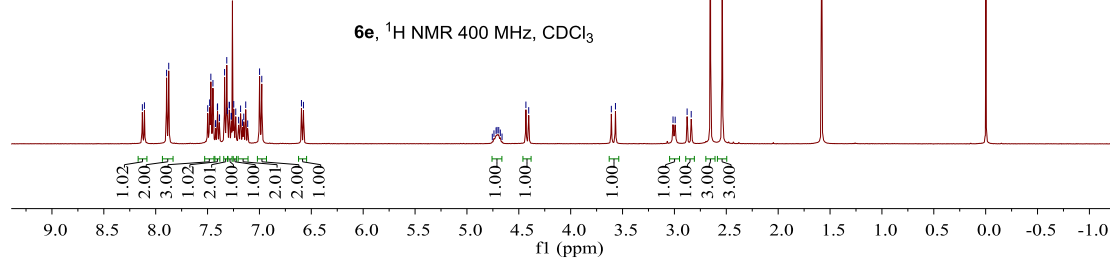

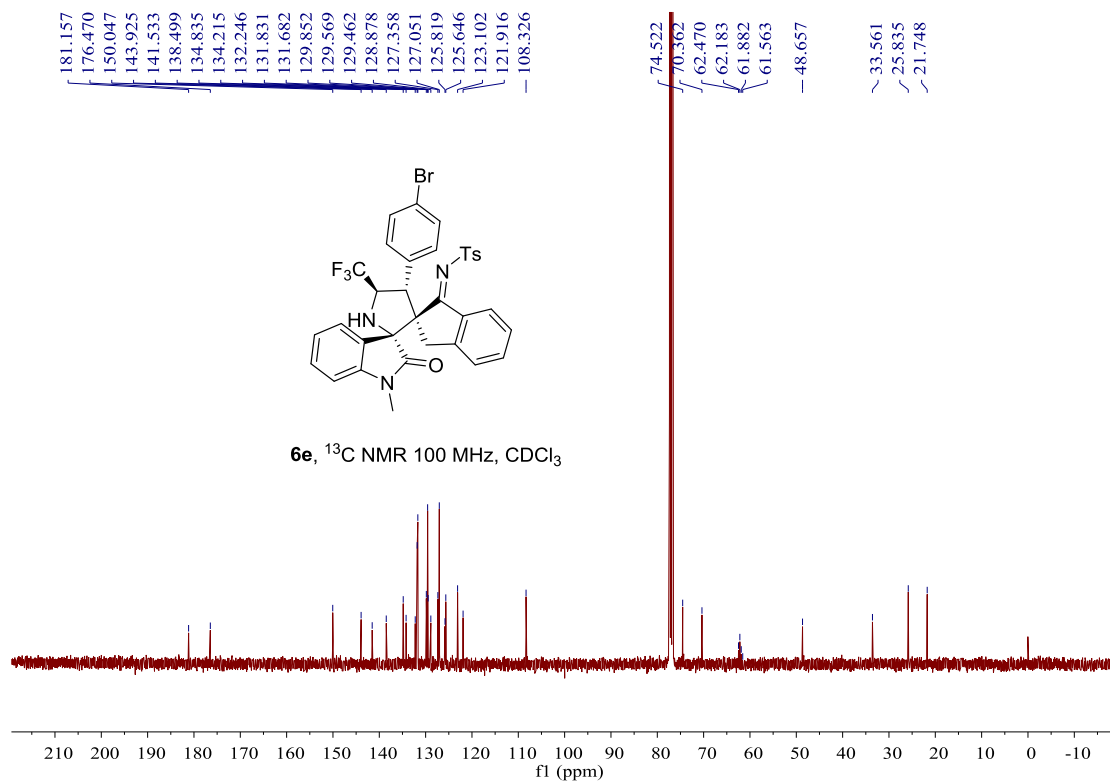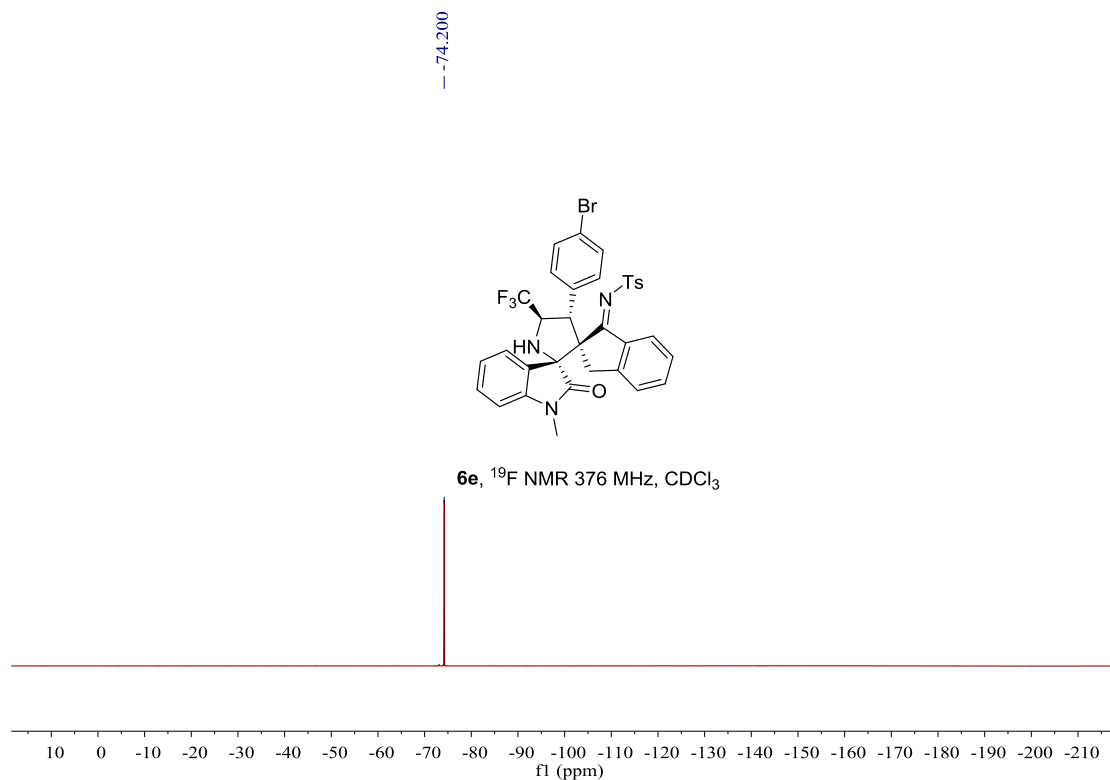



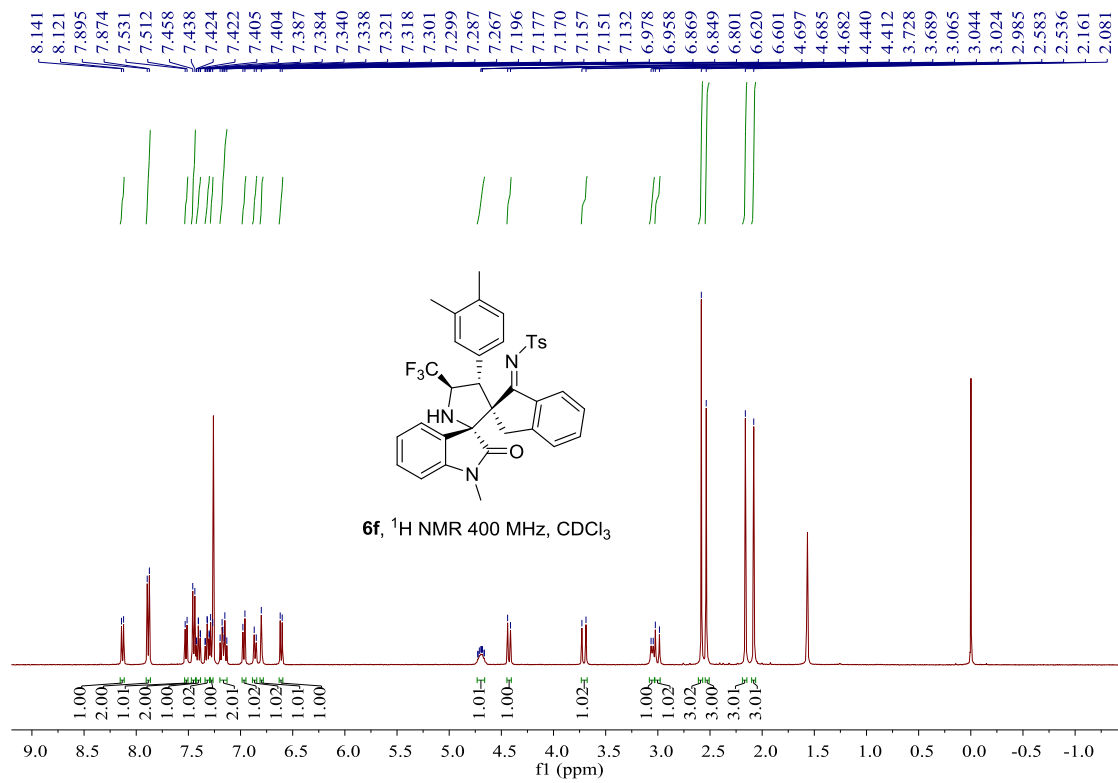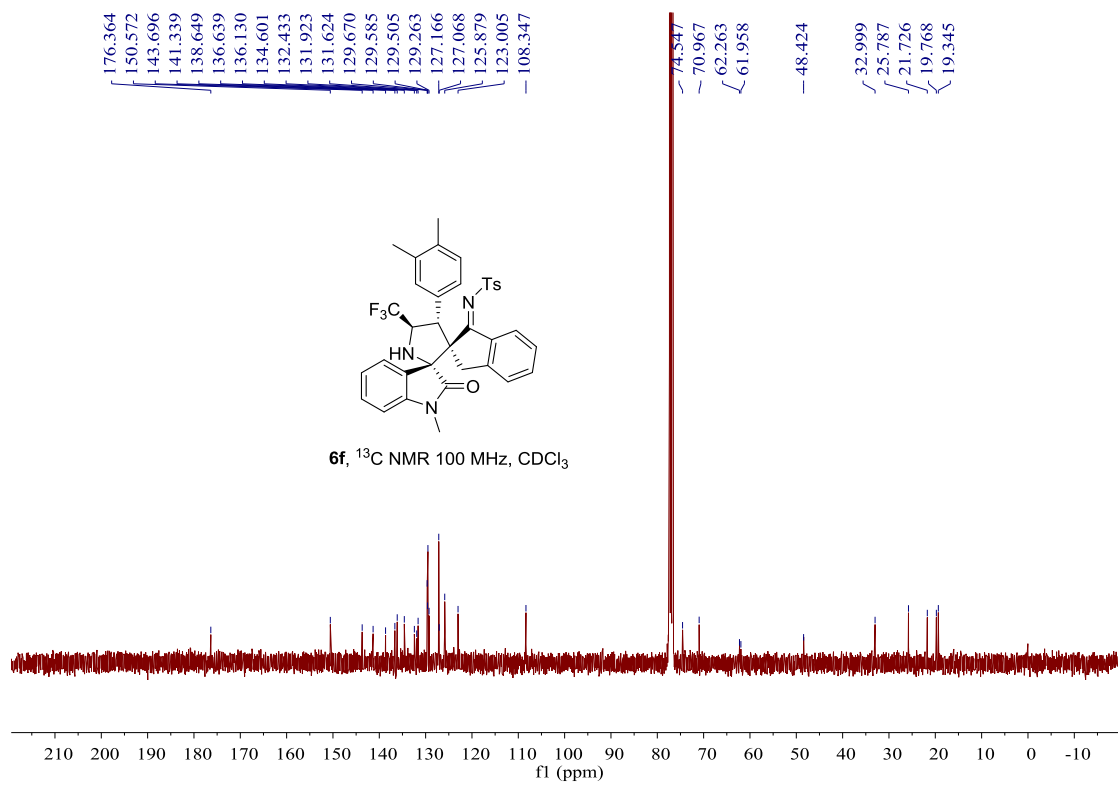

--74.067

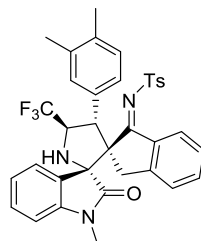

**6f**,  $^{19}\text{F}$  NMR 376 MHz,  $\text{CDCl}_3$

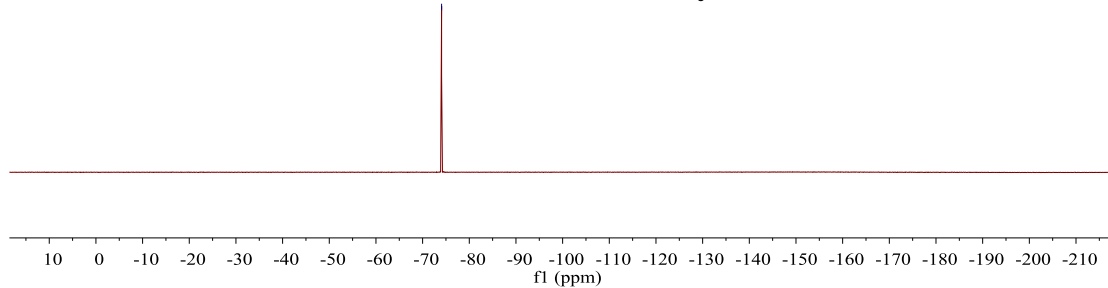

8.254  
8.234  
7.881  
7.860  
7.463  
7.444  
7.339  
7.337  
7.320  
7.317  
7.313  
7.300  
7.297  
7.293  
7.251  
7.231  
7.212  
7.184  
7.182  
7.171  
7.169  
7.080  
7.078  
7.059  
7.042  
7.040  
6.908  
6.899  
6.896  
6.830  
6.821  
6.652  
6.633  
6.633  
4.718  
4.648  
4.633  
4.626  
4.622  
4.610  
4.599  
4.599  
3.751  
3.711  
3.152  
3.129  
3.003  
2.963  
2.589  
2.513

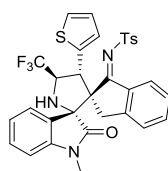

**6g**,  $^1\text{H}$  NMR 400 MHz,  $\text{CDCl}_3$

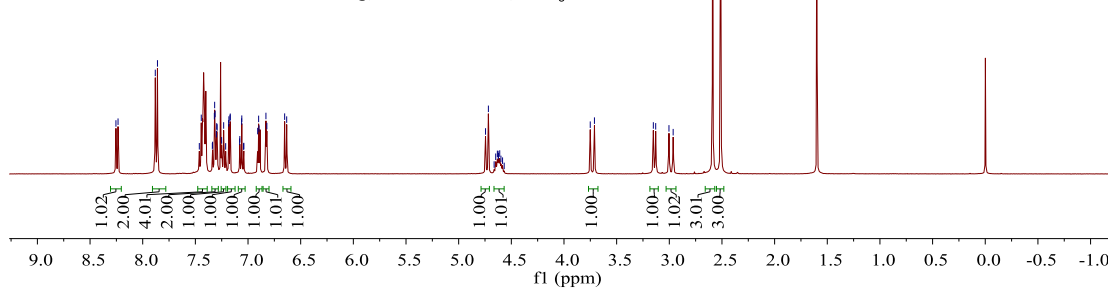

1.02  
2.00  
4.01  
2.00  
1.00  
1.00  
1.01  
1.00  
1.00  
1.01  
1.00  
1.00  
1.01  
1.01  
1.00  
1.01  
1.01  
1.00  
1.02  
3.01  
3.00

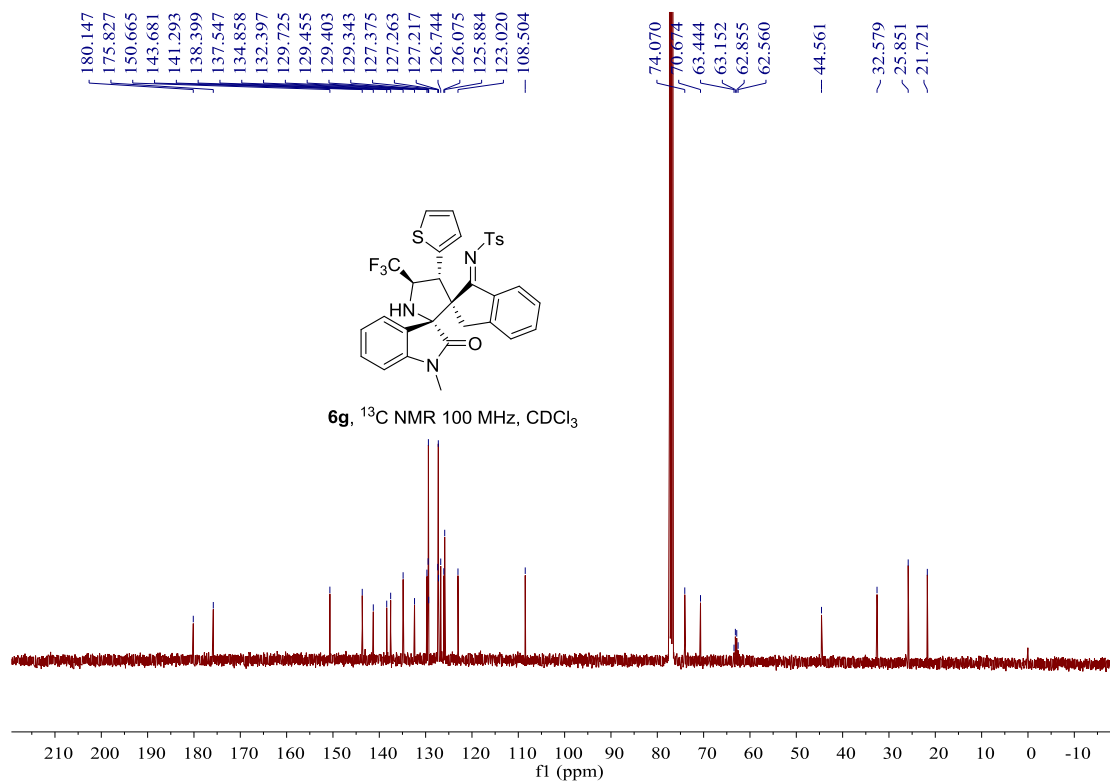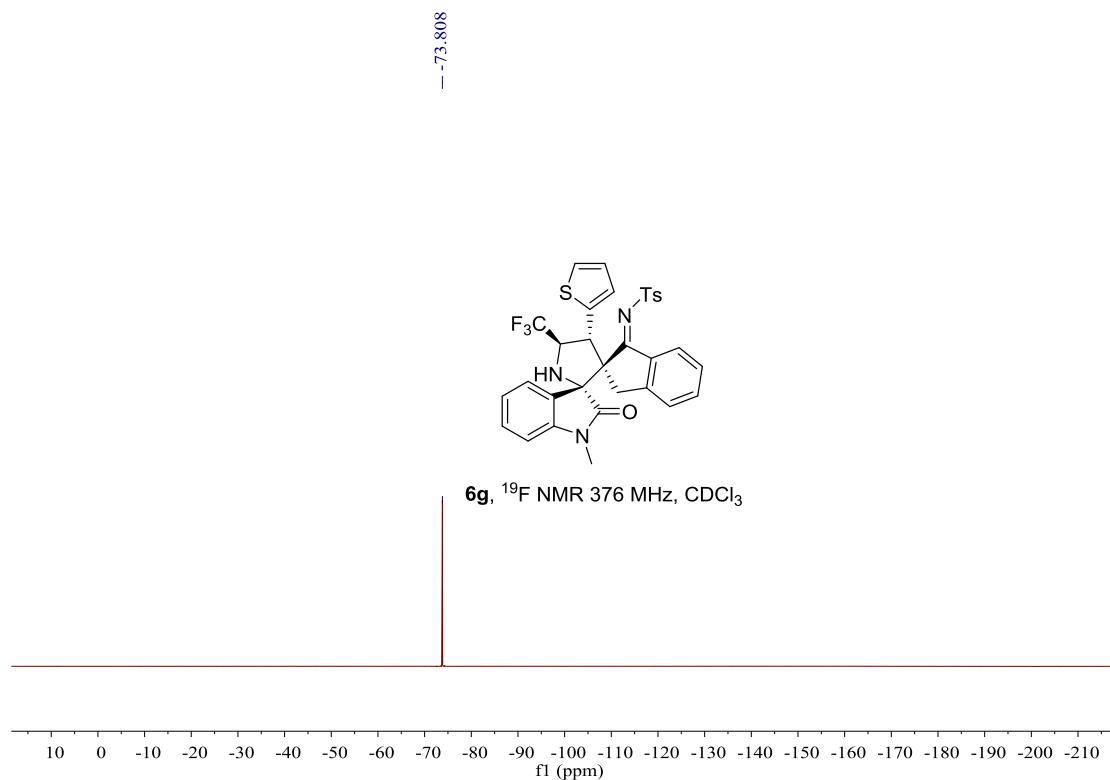

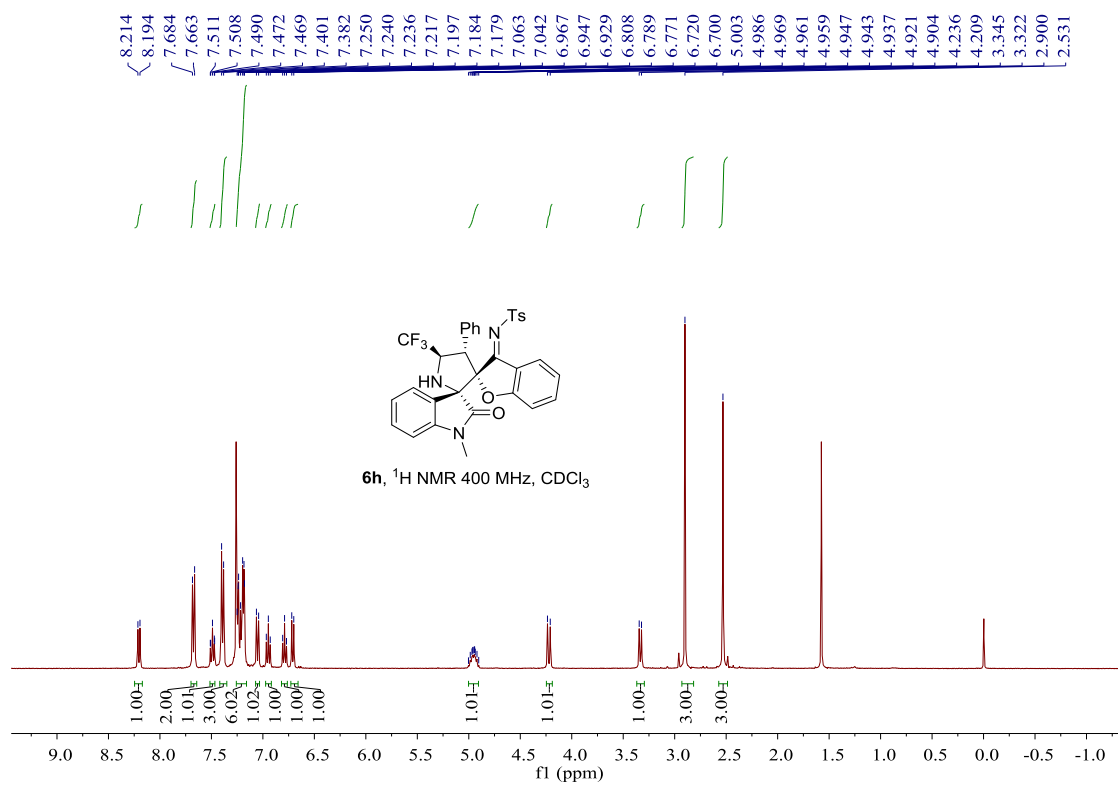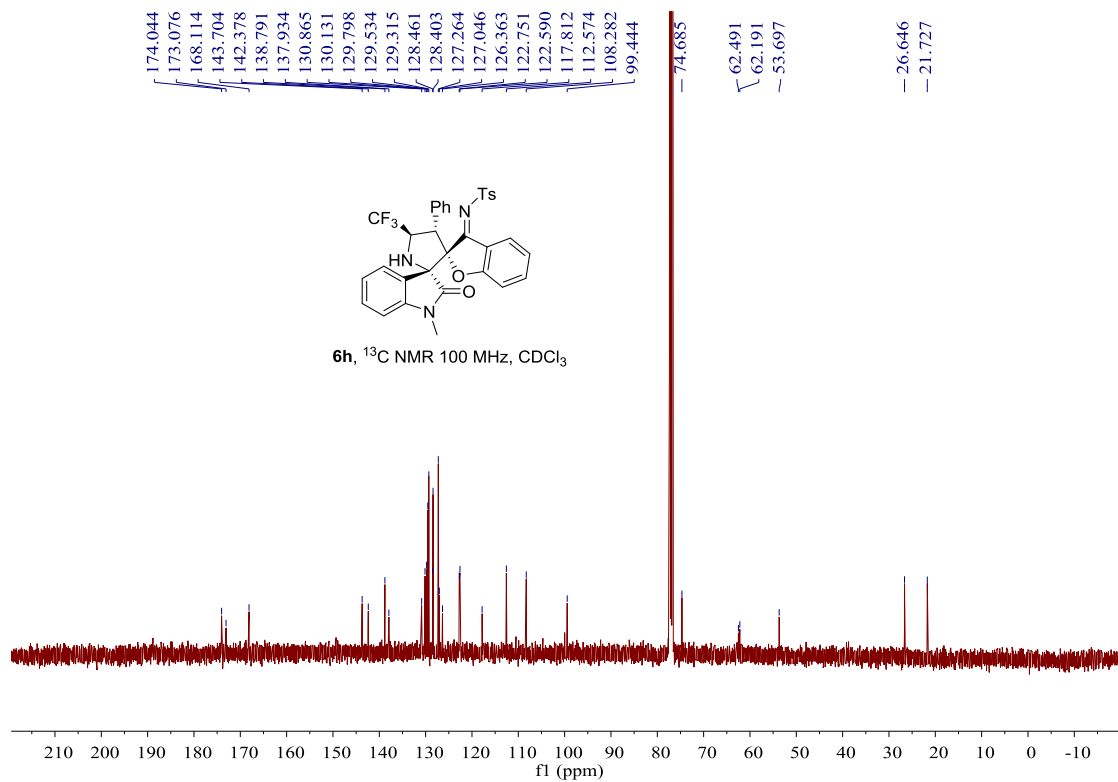

--73.112

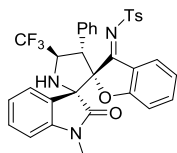

6h, <sup>19</sup>F NMR 376 MHz, CDCl<sub>3</sub>

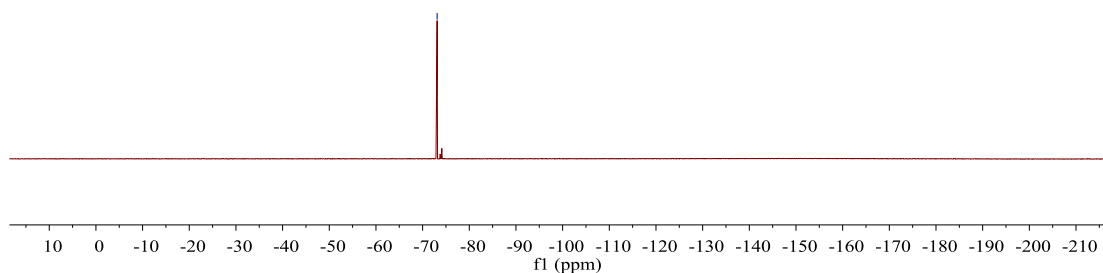

## 9. Computational details and archive entries

**Table S2.** Cartesian coordinates of the stationary points for the complexation between **1a** and DMAP, optimized at the B3LYP/6-31G\* level of theory in CH<sub>3</sub>CN.

| Species Name | Cartesian Coordinates |              |              |              |
|--------------|-----------------------|--------------|--------------|--------------|
| <b>1a</b>    | 6                     | -2.872236000 | 2.098798000  | -0.002196000 |
|              | 6                     | -1.466788000 | 2.234696000  | 0.013184000  |
|              | 6                     | -0.919526000 | 3.532543000  | 0.038128000  |
|              | 6                     | -1.760564000 | 4.638824000  | 0.046036000  |
|              | 6                     | -3.153269000 | 4.476935000  | 0.028868000  |
|              | 6                     | -3.720998000 | 3.204904000  | 0.004589000  |
|              | 6                     | -1.768725000 | -0.181288000 | -0.014717000 |
|              | 6                     | -0.781105000 | 0.935104000  | -0.000780000 |
|              | 1                     | 0.150069000  | 3.683808000  | 0.052501000  |
|              | 1                     | -1.332493000 | 5.635907000  | 0.065776000  |
|              | 1                     | -3.799488000 | 5.349762000  | 0.034930000  |
|              | 1                     | -4.798911000 | 3.078029000  | -0.008273000 |
|              | 16                    | -3.436158000 | 0.427203000  | -0.029502000 |
|              | 6                     | -1.379481000 | -1.483038000 | 0.006994000  |
|              | 1                     | -0.298646000 | -1.603079000 | 0.047651000  |
|              | 6                     | -2.125553000 | -2.730435000 | 0.001984000  |
|              | 6                     | -1.381855000 | -3.919199000 | 0.183834000  |
|              | 6                     | -3.522029000 | -2.845259000 | -0.176241000 |
|              | 6                     | -2.002619000 | -5.163573000 | 0.203761000  |
| 1            | -0.305176000          | -3.851711000 | 0.314780000  |              |
| 6            | -4.139733000          | -4.092591000 | -0.161233000 |              |

|           |    |              |              |              |
|-----------|----|--------------|--------------|--------------|
|           | 1  | -4.133626000 | -1.967380000 | -0.347244000 |
|           | 6  | -3.386804000 | -5.254933000 | 0.032218000  |
|           | 1  | -1.409027000 | -6.061265000 | 0.349669000  |
|           | 1  | -5.214387000 | -4.158472000 | -0.303922000 |
|           | 1  | -3.875801000 | -6.224741000 | 0.044547000  |
|           | 7  | 0.480918000  | 0.595631000  | -0.006713000 |
|           | 16 | 1.789987000  | 1.628062000  | 0.008601000  |
|           | 8  | 1.860077000  | 2.404196000  | -1.246712000 |
|           | 8  | 1.861669000  | 2.369810000  | 1.284496000  |
|           | 6  | 3.121109000  | 0.435620000  | -0.008430000 |
|           | 6  | 3.658607000  | -0.010707000 | 1.199462000  |
|           | 6  | 3.613202000  | -0.027269000 | -1.230752000 |
|           | 6  | 4.698443000  | -0.939075000 | 1.175930000  |
|           | 1  | 3.273937000  | 0.366454000  | 2.140911000  |
|           | 6  | 4.652286000  | -0.954948000 | -1.234242000 |
|           | 1  | 3.193616000  | 0.337237000  | -2.162324000 |
|           | 6  | 5.211813000  | -1.424448000 | -0.035551000 |
|           | 1  | 5.118987000  | -1.289616000 | 2.114728000  |
|           | 1  | 5.037203000  | -1.318484000 | -2.183473000 |
|           | 6  | 6.358539000  | -2.405866000 | -0.053787000 |
|           | 1  | 7.315021000  | -1.884630000 | -0.190525000 |
|           | 1  | 6.421458000  | -2.965634000 | 0.884267000  |
|           | 1  | 6.259314000  | -3.120647000 | -0.877212000 |
| <b>1b</b> | 6  | 2.550567000  | 2.128109000  | 0.001662000  |
|           | 6  | 1.152599000  | 2.273615000  | 0.000176000  |
|           | 6  | 0.601490000  | 3.567465000  | -0.000273000 |
|           | 6  | 1.465243000  | 4.656845000  | 0.000816000  |
|           | 6  | 2.860407000  | 4.474576000  | 0.002370000  |
|           | 6  | 3.430396000  | 3.201504000  | 0.002828000  |
|           | 6  | 1.796471000  | 0.042381000  | 0.000272000  |
|           | 6  | 0.609025000  | 0.917958000  | -0.000837000 |
|           | 1  | -0.470179000 | 3.717014000  | -0.001156000 |
|           | 1  | 1.058565000  | 5.662951000  | 0.000530000  |
|           | 1  | 3.511060000  | 5.344008000  | 0.003252000  |
|           | 1  | 4.503795000  | 3.048306000  | 0.004011000  |
|           | 8  | 2.946099000  | 0.817095000  | 0.001793000  |
|           | 6  | 1.804523000  | -1.309402000 | -0.000191000 |
|           | 1  | 0.807751000  | -1.743304000 | -0.001462000 |
|           | 6  | 2.912245000  | -2.248918000 | 0.000567000  |
|           | 6  | 4.273965000  | -1.870974000 | 0.001874000  |
|           | 6  | 2.599098000  | -3.626120000 | -0.000120000 |
|           | 6  | 5.272704000  | -2.839990000 | 0.002405000  |
|           | 1  | 4.542133000  | -0.821971000 | 0.002444000  |
|           | 6  | 3.602355000  | -4.590266000 | 0.000433000  |

|           |              |              |              |              |
|-----------|--------------|--------------|--------------|--------------|
|           | 1            | 1.555957000  | -3.931305000 | -0.001105000 |
|           | 6            | 4.944395000  | -4.200090000 | 0.001685000  |
|           | 1            | 6.314998000  | -2.533804000 | 0.003391000  |
|           | 1            | 3.339216000  | -5.644046000 | -0.000130000 |
|           | 1            | 5.730249000  | -4.950050000 | 0.002100000  |
|           | 7            | -0.585308000 | 0.385425000  | -0.002534000 |
|           | 16           | -1.969490000 | 1.328206000  | -0.004589000 |
|           | 8            | -2.083053000 | 2.087245000  | 1.258172000  |
|           | 8            | -2.082456000 | 2.080328000  | -1.271527000 |
|           | 6            | -3.219433000 | 0.051813000  | -0.001248000 |
|           | 6            | -3.695554000 | -0.446588000 | -1.215671000 |
|           | 6            | -3.708223000 | -0.427134000 | 1.215230000  |
|           | 6            | -4.668344000 | -1.443872000 | -1.202942000 |
|           | 1            | -3.314736000 | -0.056468000 | -2.153493000 |
|           | 6            | -4.681509000 | -1.424883000 | 1.207867000  |
|           | 1            | -3.337195000 | -0.022357000 | 2.150725000  |
|           | 6            | -5.176640000 | -1.947995000 | 0.004182000  |
|           | 1            | -5.040376000 | -1.835793000 | -2.145956000 |
|           | 1            | -5.063685000 | -1.801616000 | 2.152910000  |
|           | 6            | -6.251445000 | -3.007837000 | 0.005041000  |
|           | 1            | -7.247139000 | -2.552827000 | -0.077737000 |
|           | 1            | -6.136987000 | -3.693244000 | -0.840855000 |
|           | 1            | -6.235160000 | -3.593282000 | 0.929425000  |
| <b>1c</b> | 6            | -2.749726000 | 2.226751000  | 0.010161000  |
|           | 6            | -1.344550000 | 2.332671000  | -0.001488000 |
|           | 6            | -0.734585000 | 3.599236000  | -0.013773000 |
|           | 6            | -1.540774000 | 4.733366000  | -0.013797000 |
|           | 6            | -2.938723000 | 4.619805000  | -0.001598000 |
|           | 6            | -3.550538000 | 3.365384000  | 0.010452000  |
|           | 6            | -1.900012000 | 0.014085000  | 0.008590000  |
|           | 6            | -0.767755000 | 0.973478000  | 0.000575000  |
|           | 1            | 0.341034000  | 3.707979000  | -0.023347000 |
|           | 1            | -1.080885000 | 5.716973000  | -0.023468000 |
|           | 1            | -3.550637000 | 5.517446000  | -0.001763000 |
|           | 1            | -4.633529000 | 3.279147000  | 0.019610000  |
|           | 6            | -3.198790000 | 0.788577000  | 0.021820000  |
|           | 6            | -1.688246000 | -1.324182000 | -0.001391000 |
|           | 1            | -0.639330000 | -1.615913000 | -0.015477000 |
|           | 6            | -2.618467000 | -2.447385000 | -0.000253000 |
|           | 6            | -2.059062000 | -3.744199000 | -0.036065000 |
|           | 6            | -4.026118000 | -2.337537000 | 0.034273000  |
|           | 6            | -2.862660000 | -4.880325000 | -0.039568000 |
|           | 1            | -0.977557000 | -3.849508000 | -0.061837000 |
| 6         | -4.828215000 | -3.475776000 | 0.031548000  |              |

|                  |    |              |              |              |
|------------------|----|--------------|--------------|--------------|
|                  | 1  | -4.502039000 | -1.366280000 | 0.065213000  |
|                  | 6  | -4.253476000 | -4.750022000 | -0.005789000 |
|                  | 1  | -2.406008000 | -5.865472000 | -0.068170000 |
|                  | 1  | -5.908837000 | -3.368174000 | 0.058917000  |
|                  | 1  | -4.885517000 | -5.633502000 | -0.007955000 |
|                  | 7  | 0.455757000  | 0.513938000  | -0.002798000 |
|                  | 16 | 1.828868000  | 1.463279000  | -0.011337000 |
|                  | 8  | 1.949438000  | 2.206954000  | -1.283443000 |
|                  | 8  | 1.951913000  | 2.228666000  | 1.247559000  |
|                  | 6  | 3.084457000  | 0.189973000  | -0.001246000 |
|                  | 6  | 3.574467000  | -0.281997000 | 1.217312000  |
|                  | 6  | 3.565722000  | -0.311184000 | -1.212434000 |
|                  | 6  | 4.553408000  | -1.274446000 | 1.215730000  |
|                  | 1  | 3.200216000  | 0.124730000  | 2.150704000  |
|                  | 6  | 4.544152000  | -1.302988000 | -1.194516000 |
|                  | 1  | 3.184629000  | 0.073468000  | -2.152428000 |
|                  | 6  | 5.053672000  | -1.799556000 | 0.015192000  |
|                  | 1  | 4.936220000  | -1.645035000 | 2.162999000  |
|                  | 1  | 4.919962000  | -1.696275000 | -2.135537000 |
|                  | 6  | 6.135071000  | -2.852806000 | 0.021739000  |
|                  | 1  | 7.127486000  | -2.393223000 | -0.074221000 |
|                  | 1  | 6.128940000  | -3.426689000 | 0.953471000  |
|                  | 1  | 6.018826000  | -3.549770000 | -0.814520000 |
|                  | 1  | -3.827788000 | 0.560176000  | -0.848764000 |
|                  | 1  | -3.803700000 | 0.569383000  | 0.911765000  |
|                  | 6  | -3.824606000 | 0.017207000  | -0.907171000 |
|                  | 6  | -2.889701000 | -1.039106000 | -1.026143000 |
|                  | 6  | -3.277675000 | -2.196690000 | -1.729520000 |
|                  | 6  | -4.560885000 | -2.290104000 | -2.254637000 |
|                  | 6  | -5.482164000 | -1.238569000 | -2.101898000 |
|                  | 6  | -5.118370000 | -0.074835000 | -1.433426000 |
|                  | 6  | -1.618722000 | 0.559598000  | 0.142831000  |
|                  | 6  | -1.601413000 | -0.717833000 | -0.400365000 |
|                  | 1  | -2.567833000 | -3.003477000 | -1.874561000 |
|                  | 1  | -4.853845000 | -3.185075000 | -2.796695000 |
|                  | 1  | -6.482572000 | -1.329607000 | -2.515934000 |
|                  | 1  | -5.820388000 | 0.747133000  | -1.324777000 |
|                  | 16 | -3.158278000 | 1.408707000  | -0.071312000 |
|                  | 6  | -0.469493000 | 1.146544000  | 0.888228000  |
|                  | 1  | 0.051876000  | 0.300630000  | 1.347269000  |
|                  | 6  | -0.853687000 | 2.155891000  | 1.960963000  |
|                  | 6  | -1.079202000 | 3.506889000  | 1.663117000  |
|                  | 6  | -1.025153000 | 1.710925000  | 3.278272000  |
|                  | 6  | -1.477898000 | 4.393746000  | 2.665283000  |
| <b>1a-py-com</b> |    |              |              |              |



|    |              |              |              |
|----|--------------|--------------|--------------|
| 1  | -0.935680000 | 3.874237000  | 0.650663000  |
| 6  | -1.425626000 | 2.597220000  | 4.279086000  |
| 1  | -0.847000000 | 0.666046000  | 3.519784000  |
| 6  | -1.653500000 | 3.941531000  | 3.974752000  |
| 1  | -1.647724000 | 5.438596000  | 2.421055000  |
| 1  | -1.552292000 | 2.238389000  | 5.296625000  |
| 1  | -1.960621000 | 4.633098000  | 4.754188000  |
| 7  | -0.428607000 | -1.441488000 | -0.359113000 |
| 16 | -0.373669000 | -3.041077000 | -0.256207000 |
| 8  | -1.305495000 | -3.626005000 | 0.751741000  |
| 8  | -0.388194000 | -3.741672000 | -1.577410000 |
| 6  | 1.296278000  | -3.263721000 | 0.376400000  |
| 6  | 2.388904000  | -3.204319000 | -0.492729000 |
| 6  | 1.492217000  | -3.500610000 | 1.736662000  |
| 6  | 3.677744000  | -3.369209000 | 0.010791000  |
| 1  | 2.230133000  | -3.037042000 | -1.553134000 |
| 6  | 2.788273000  | -3.668473000 | 2.227398000  |
| 1  | 0.635925000  | -3.557184000 | 2.400593000  |
| 6  | 3.900113000  | -3.605596000 | 1.376675000  |
| 1  | 4.525996000  | -3.318216000 | -0.667944000 |
| 1  | 2.936704000  | -3.852779000 | 3.288757000  |
| 6  | 5.299504000  | -3.814561000 | 1.905712000  |
| 1  | 5.637321000  | -4.844444000 | 1.730172000  |
| 1  | 6.017277000  | -3.151932000 | 1.410191000  |
| 1  | 5.351528000  | -3.632129000 | 2.983597000  |
| 6  | 2.638506000  | 2.829216000  | -1.644663000 |
| 6  | 2.805585000  | 2.633147000  | -0.239870000 |
| 6  | 1.789282000  | 2.108089000  | 0.510548000  |
| 7  | 0.594193000  | 1.752983000  | -0.032591000 |
| 6  | 0.406487000  | 1.912379000  | -1.364131000 |
| 6  | 1.376340000  | 2.438697000  | -2.179189000 |
| 1  | 3.728691000  | 2.889014000  | 0.261197000  |
| 1  | 1.891561000  | 1.953767000  | 1.577832000  |
| 1  | -0.553619000 | 1.590941000  | -1.745142000 |
| 1  | 1.153168000  | 2.537617000  | -3.232416000 |
| 7  | 3.615871000  | 3.345375000  | -2.414190000 |
| 6  | 3.403786000  | 3.529137000  | -3.852111000 |
| 1  | 4.300872000  | 3.965672000  | -4.288043000 |
| 1  | 3.208781000  | 2.571544000  | -4.347609000 |
| 1  | 2.563163000  | 4.205351000  | -4.042328000 |
| 6  | 4.903959000  | 3.720104000  | -1.824718000 |
| 1  | 5.551788000  | 4.105399000  | -2.610351000 |
| 1  | 4.779207000  | 4.501061000  | -1.066505000 |
| 1  | 5.394755000  | 2.854483000  | -1.366462000 |

|  |    |              |              |              |
|--|----|--------------|--------------|--------------|
|  | 6  | -0.516595000 | -3.333565000 | -0.931850000 |
|  | 6  | 0.749871000  | -2.749726000 | -1.127649000 |
|  | 6  | 1.706463000  | -3.460048000 | -1.873948000 |
|  | 6  | 1.367109000  | -4.713970000 | -2.375948000 |
|  | 6  | 0.093549000  | -5.272454000 | -2.153767000 |
|  | 6  | -0.875797000 | -4.583907000 | -1.426698000 |
|  | 6  | -0.570641000 | -1.379419000 | 0.079492000  |
|  | 6  | 0.702347000  | -1.448446000 | -0.451686000 |
|  | 1  | 2.682810000  | -3.030711000 | -2.066347000 |
|  | 1  | 2.097731000  | -5.272191000 | -2.954871000 |
|  | 1  | -0.140136000 | -6.253641000 | -2.557399000 |
|  | 1  | -1.864668000 | -4.994491000 | -1.248792000 |
|  | 8  | -1.333519000 | -2.516169000 | -0.208801000 |
|  | 6  | -1.158614000 | -0.321312000 | 0.927056000  |
|  | 1  | -0.307864000 | 0.286522000  | 1.247318000  |
|  | 6  | -1.909002000 | -0.830440000 | 2.151858000  |
|  | 6  | -3.206348000 | -1.352334000 | 2.061273000  |
|  | 6  | -1.267980000 | -0.809234000 | 3.396794000  |
|  | 6  | -3.848414000 | -1.845161000 | 3.197779000  |
|  | 1  | -3.721216000 | -1.373319000 | 1.105143000  |
|  | 6  | -1.909104000 | -1.306176000 | 4.533223000  |
|  | 1  | -0.262263000 | -0.404279000 | 3.477414000  |
|  | 6  | -3.201849000 | -1.824650000 | 4.436490000  |
|  | 1  | -4.855034000 | -2.245487000 | 3.114868000  |
|  | 1  | -1.400147000 | -1.280807000 | 5.492698000  |
|  | 1  | -3.704441000 | -2.207168000 | 5.320426000  |
|  | 7  | 1.598887000  | -0.412979000 | -0.316745000 |
|  | 16 | 3.166436000  | -0.623944000 | -0.574416000 |
|  | 8  | 3.802614000  | -1.656881000 | 0.296428000  |
|  | 8  | 3.543454000  | -0.743080000 | -2.016679000 |
|  | 6  | 3.789559000  | 0.973570000  | -0.031404000 |
|  | 6  | 3.727185000  | 2.074974000  | -0.888851000 |
|  | 6  | 4.346181000  | 1.103302000  | 1.240508000  |
|  | 6  | 4.211586000  | 3.308986000  | -0.459428000 |
|  | 1  | 3.308953000  | 1.964831000  | -1.884204000 |
|  | 6  | 4.830564000  | 2.344351000  | 1.657504000  |
|  | 1  | 4.401770000  | 0.238229000  | 1.892991000  |
|  | 6  | 4.771995000  | 3.465169000  | 0.818261000  |
|  | 1  | 4.157590000  | 4.165129000  | -1.127907000 |
|  | 1  | 5.261845000  | 2.441782000  | 2.650965000  |
|  | 6  | 5.322449000  | 4.800110000  | 1.261713000  |
|  | 1  | 6.343601000  | 4.949097000  | 0.886596000  |
|  | 1  | 4.715744000  | 5.628940000  | 0.881586000  |
|  | 1  | 5.360983000  | 4.874793000  | 2.352976000  |

**1b-py-com**

|                  |   |              |              |              |
|------------------|---|--------------|--------------|--------------|
|                  | 6 | -3.667233000 | 2.509468000  | -1.209561000 |
|                  | 6 | -3.068101000 | 2.809053000  | 0.051730000  |
|                  | 6 | -2.286669000 | 1.880359000  | 0.683632000  |
|                  | 7 | -2.039723000 | 0.655791000  | 0.147897000  |
|                  | 6 | -2.591899000 | 0.337084000  | -1.049329000 |
|                  | 6 | -3.391760000 | 1.213382000  | -1.736610000 |
|                  | 1 | -3.210328000 | 3.766908000  | 0.532321000  |
|                  | 1 | -1.826939000 | 2.081414000  | 1.643731000  |
|                  | 1 | -2.367091000 | -0.649863000 | -1.429916000 |
|                  | 1 | -3.800626000 | 0.890415000  | -2.683706000 |
|                  | 7 | -4.443404000 | 3.396965000  | -1.859611000 |
|                  | 6 | -5.034597000 | 3.052145000  | -3.155261000 |
|                  | 1 | -5.612210000 | 3.901490000  | -3.516105000 |
|                  | 1 | -4.258340000 | 2.823644000  | -3.893667000 |
|                  | 1 | -5.705519000 | 2.190546000  | -3.065869000 |
|                  | 6 | -4.703585000 | 4.717832000  | -1.280751000 |
|                  | 1 | -5.358767000 | 5.272762000  | -1.950111000 |
|                  | 1 | -5.198837000 | 4.630543000  | -0.307564000 |
|                  | 1 | -3.774309000 | 5.284946000  | -1.157721000 |
|                  | 6 | -0.021622000 | -3.725037000 | -0.951624000 |
|                  | 6 | 1.091580000  | -2.866205000 | -1.062976000 |
|                  | 6 | 2.235345000  | -3.294087000 | -1.747976000 |
|                  | 6 | 2.256531000  | -4.582512000 | -2.291060000 |
|                  | 6 | 1.154927000  | -5.435623000 | -2.164935000 |
|                  | 6 | 0.003374000  | -5.004422000 | -1.495780000 |
|                  | 6 | -0.538540000 | -1.679386000 | 0.090158000  |
|                  | 6 | 0.755139000  | -1.576990000 | -0.390593000 |
|                  | 1 | 3.088981000  | -2.639255000 | -1.874318000 |
|                  | 1 | 3.141595000  | -4.922385000 | -2.822979000 |
|                  | 1 | 1.190496000  | -6.433989000 | -2.593139000 |
|                  | 1 | -0.859232000 | -5.660890000 | -1.405821000 |
|                  | 6 | -1.171116000 | -0.598481000 | 0.893324000  |
|                  | 1 | -0.361334000 | -0.004075000 | 1.327776000  |
|                  | 6 | -2.087776000 | -1.094125000 | 2.001319000  |
|                  | 6 | -3.396155000 | -1.530311000 | 1.747506000  |
|                  | 6 | -1.594514000 | -1.161518000 | 3.310926000  |
|                  | 6 | -4.190806000 | -2.026432000 | 2.782192000  |
|                  | 1 | -3.800913000 | -1.476917000 | 0.740296000  |
|                  | 6 | -2.387172000 | -1.661585000 | 4.345947000  |
|                  | 1 | -0.582741000 | -0.822819000 | 3.520235000  |
|                  | 6 | -3.688604000 | -2.094967000 | 4.084310000  |
|                  | 1 | -5.203414000 | -2.358599000 | 2.570196000  |
|                  | 1 | -1.989401000 | -1.704811000 | 5.356095000  |
|                  | 1 | -4.308883000 | -2.479446000 | 4.889136000  |
| <b>1c-py-com</b> |   |              |              |              |

|    |              |              |              |
|----|--------------|--------------|--------------|
| 7  | 1.477601000  | -0.421885000 | -0.245431000 |
| 16 | 3.069188000  | -0.320623000 | -0.421657000 |
| 8  | 3.846287000  | -1.267620000 | 0.430048000  |
| 8  | 3.527735000  | -0.265310000 | -1.843014000 |
| 6  | 3.352526000  | 1.326628000  | 0.245156000  |
| 6  | 3.135475000  | 2.451596000  | -0.554526000 |
| 6  | 3.799560000  | 1.473133000  | 1.557878000  |
| 6  | 3.355957000  | 3.722676000  | -0.027734000 |
| 1  | 2.803904000  | 2.331627000  | -1.580916000 |
| 6  | 4.019572000  | 2.751919000  | 2.072553000  |
| 1  | 3.977558000  | 0.592556000  | 2.166216000  |
| 6  | 3.802418000  | 3.895374000  | 1.292104000  |
| 1  | 3.182525000  | 4.596087000  | -0.652089000 |
| 1  | 4.367238000  | 2.861385000  | 3.097028000  |
| 6  | 4.067853000  | 5.276673000  | 1.842917000  |
| 1  | 5.053396000  | 5.644070000  | 1.527640000  |
| 1  | 3.326008000  | 5.999045000  | 1.485681000  |
| 1  | 4.051848000  | 5.280945000  | 2.937256000  |
| 6  | -3.254065000 | 2.413961000  | -1.478093000 |
| 6  | -3.112324000 | 2.512332000  | -0.060731000 |
| 6  | -2.464292000 | 1.530048000  | 0.639146000  |
| 7  | -1.931003000 | 0.437419000  | 0.032822000  |
| 6  | -2.029317000 | 0.323616000  | -1.311427000 |
| 6  | -2.671246000 | 1.261921000  | -2.080350000 |
| 1  | -3.508192000 | 3.354190000  | 0.490318000  |
| 1  | -2.349933000 | 1.579804000  | 1.715128000  |
| 1  | -1.556698000 | -0.551450000 | -1.738760000 |
| 1  | -2.710375000 | 1.101243000  | -3.148804000 |
| 7  | -3.895053000 | 3.355485000  | -2.199185000 |
| 6  | -4.019476000 | 3.214462000  | -3.651638000 |
| 1  | -4.595382000 | 4.053087000  | -4.039590000 |
| 1  | -3.036481000 | 3.215764000  | -4.136443000 |
| 1  | -4.542445000 | 2.288032000  | -3.912906000 |
| 6  | -4.455811000 | 4.538446000  | -1.541842000 |
| 1  | -4.926581000 | 5.169665000  | -2.293808000 |
| 1  | -5.215051000 | 4.256901000  | -0.803851000 |
| 1  | -3.673974000 | 5.121737000  | -1.042726000 |
| 6  | -1.138617000 | -3.031738000 | -0.212545000 |
| 1  | -1.425031000 | -3.581561000 | 0.696121000  |
| 1  | -2.050333000 | -2.989861000 | -0.829816000 |

**Table S3.** Cartesian coordinates of the main stationary points for the formation of **4** and **5**, optimized at the B3LYP/6-31G\* level of theory in CH<sub>3</sub>CN.

| Species Name | Cartesian Coordinates |              |              |              |
|--------------|-----------------------|--------------|--------------|--------------|
| <b>2</b>     | 6                     | -3.950142000 | -1.687867000 | 0.006595000  |
|              | 6                     | -3.744759000 | -0.299879000 | 0.008550000  |
|              | 6                     | -2.431513000 | 0.151014000  | 0.002112000  |
|              | 6                     | -1.344819000 | -0.745124000 | -0.006023000 |
|              | 6                     | -1.562000000 | -2.119067000 | -0.007792000 |
|              | 6                     | -2.879836000 | -2.589408000 | -0.001495000 |
|              | 1                     | -4.968128000 | -2.066781000 | 0.011459000  |
|              | 1                     | -4.584357000 | 0.386968000  | 0.014801000  |
|              | 1                     | -0.719895000 | -2.804576000 | -0.014249000 |
|              | 1                     | -3.073750000 | -3.657448000 | -0.002926000 |
|              | 6                     | -0.119491000 | 0.057019000  | -0.011251000 |
|              | 6                     | -0.589202000 | 1.519051000  | -0.007133000 |
|              | 7                     | -1.964183000 | 1.480539000  | 0.002289000  |
|              | 8                     | 0.112664000  | 2.522713000  | -0.011080000 |
|              | 7                     | 1.075054000  | -0.390449000 | -0.016927000 |
|              | 6                     | 2.201042000  | 0.526730000  | -0.021209000 |
|              | 1                     | 2.214163000  | 1.162014000  | -0.913811000 |
|              | 1                     | 2.198759000  | 1.196265000  | 0.845815000  |
|              | 6                     | 3.489644000  | -0.271590000 | 0.004584000  |
|              | 9                     | 3.588217000  | -1.042243000 | 1.109386000  |
|              | 9                     | 3.604026000  | -1.089218000 | -1.064183000 |
|              | 9                     | 4.556652000  | 0.560410000  | -0.005559000 |
|              | 6                     | -2.809094000 | 2.661414000  | 0.009557000  |
|              | 1                     | -2.156275000 | 3.534866000  | 0.008377000  |
| 1            | -3.448179000          | 2.683330000  | -0.879141000 |              |
| 1            | -3.438770000          | 2.678742000  | 0.905016000  |              |
| <b>2'</b>    | 6                     | -2.762093000 | -3.810752000 | -0.954290000 |
|              | 6                     | -3.703748000 | -3.030489000 | -0.265915000 |
|              | 6                     | -3.405329000 | -1.691342000 | -0.037621000 |
|              | 6                     | -2.183170000 | -1.099904000 | -0.471384000 |
|              | 6                     | -1.270632000 | -1.895869000 | -1.174605000 |
|              | 6                     | -1.563378000 | -3.246520000 | -1.405862000 |
|              | 1                     | -2.973646000 | -4.859905000 | -1.143080000 |
|              | 1                     | -4.640980000 | -3.461992000 | 0.074620000  |
|              | 1                     | -0.346602000 | -1.470388000 | -1.556530000 |
|              | 1                     | -0.850350000 | -3.861017000 | -1.950026000 |
|              | 6                     | -2.225195000 | 0.289572000  | -0.071621000 |
|              | 6                     | -3.501442000 | 0.521146000  | 0.585184000  |
|              | 7                     | -4.171546000 | -0.717124000 | 0.594448000  |
|              | 8                     | -3.975268000 | 1.561545000  | 1.083035000  |

|      |    |              |              |              |
|------|----|--------------|--------------|--------------|
|      | 7  | -1.238265000 | 1.197334000  | -0.259781000 |
|      | 6  | -1.343580000 | 2.465752000  | 0.032405000  |
|      | 1  | -2.234034000 | 2.918618000  | 0.457867000  |
|      | 6  | -0.176632000 | 3.348931000  | -0.202115000 |
|      | 9  | 0.841389000  | 3.191377000  | 0.704905000  |
|      | 9  | 0.420439000  | 3.146304000  | -1.418738000 |
|      | 9  | -0.533073000 | 4.651805000  | -0.145928000 |
|      | 6  | -5.482763000 | -0.912369000 | 1.170310000  |
|      | 1  | -5.804099000 | 0.048356000  | 1.576834000  |
|      | 1  | -6.205779000 | -1.243734000 | 0.414734000  |
|      | 1  | -5.457483000 | -1.655002000 | 1.977145000  |
|      | 6  | 4.057141000  | -0.780868000 | 0.239143000  |
|      | 6  | 2.913818000  | -1.384506000 | 0.846963000  |
|      | 6  | 1.662745000  | -0.874280000 | 0.618748000  |
|      | 7  | 1.475119000  | 0.204852000  | -0.177712000 |
|      | 6  | 2.530261000  | 0.815202000  | -0.767726000 |
|      | 6  | 3.809187000  | 0.357441000  | -0.587583000 |
|      | 1  | 3.006802000  | -2.248112000 | 1.490308000  |
|      | 1  | 0.770170000  | -1.307080000 | 1.052951000  |
|      | 1  | 2.300224000  | 1.680955000  | -1.373854000 |
|      | 1  | 4.615466000  | 0.880930000  | -1.081766000 |
|      | 7  | 5.301619000  | -1.258651000 | 0.435883000  |
|      | 6  | 6.450922000  | -0.620964000 | -0.211550000 |
|      | 1  | 6.345415000  | -0.633764000 | -1.301825000 |
|      | 1  | 6.568463000  | 0.416084000  | 0.122249000  |
|      | 1  | 7.353159000  | -1.170675000 | 0.051486000  |
|      | 6  | 5.520711000  | -2.420872000 | 1.300730000  |
|      | 1  | 6.587213000  | -2.636417000 | 1.337981000  |
|      | 1  | 5.173073000  | -2.224342000 | 2.320806000  |
|      | 1  | 5.003028000  | -3.305258000 | 0.912967000  |
|      | 1  | 0.503873000  | 0.574260000  | -0.318432000 |
| TS-1 | 6  | -3.938653000 | 1.044947000  | -2.373997000 |
|      | 6  | -2.660934000 | 1.583874000  | -2.106364000 |
|      | 6  | -2.272001000 | 2.759131000  | -2.776104000 |
|      | 6  | -3.144826000 | 3.356153000  | -3.676061000 |
|      | 6  | -4.414053000 | 2.802115000  | -3.928580000 |
|      | 6  | -4.822874000 | 1.642307000  | -3.279569000 |
|      | 6  | -2.637369000 | -0.291008000 | -0.684349000 |
|      | 6  | -1.916461000 | 0.800751000  | -1.126412000 |
|      | 1  | -1.298294000 | 3.189103000  | -2.579743000 |
|      | 1  | -2.845749000 | 4.264337000  | -4.191800000 |
|      | 1  | -5.082493000 | 3.283834000  | -4.636542000 |
|      | 1  | -5.801040000 | 1.210823000  | -3.470563000 |
|      | 16 | -4.223733000 | -0.420004000 | -1.452651000 |

|    |              |              |              |
|----|--------------|--------------|--------------|
| 6  | -2.164952000 | -1.358421000 | 0.269754000  |
| 1  | -1.072655000 | -1.348378000 | 0.218999000  |
| 6  | -2.662557000 | -2.757966000 | -0.102287000 |
| 6  | -3.753420000 | -3.369345000 | 0.527429000  |
| 6  | -2.010819000 | -3.436345000 | -1.141784000 |
| 6  | -4.190414000 | -4.632417000 | 0.117239000  |
| 1  | -4.268760000 | -2.876046000 | 1.345767000  |
| 6  | -2.445899000 | -4.697076000 | -1.548350000 |
| 1  | -1.152998000 | -2.979785000 | -1.626132000 |
| 6  | -3.540120000 | -5.299536000 | -0.920928000 |
| 1  | -5.038084000 | -5.092722000 | 0.617148000  |
| 1  | -1.920336000 | -5.211596000 | -2.347702000 |
| 1  | -3.878038000 | -6.283033000 | -1.235342000 |
| 7  | -0.587124000 | 1.082272000  | -0.757697000 |
| 16 | -0.289330000 | 1.940517000  | 0.595082000  |
| 8  | -1.240535000 | 1.603088000  | 1.678799000  |
| 8  | 1.152997000  | 1.801810000  | 0.880981000  |
| 6  | -0.570655000 | 3.691161000  | 0.252055000  |
| 6  | 0.407702000  | 4.437949000  | -0.412067000 |
| 6  | -1.773297000 | 4.288067000  | 0.635207000  |
| 6  | 0.171059000  | 5.782412000  | -0.691051000 |
| 1  | 1.342201000  | 3.974492000  | -0.706490000 |
| 6  | -1.995046000 | 5.635402000  | 0.348178000  |
| 1  | -2.522251000 | 3.705853000  | 1.160804000  |
| 6  | -1.030211000 | 6.404694000  | -0.316163000 |
| 1  | 0.934258000  | 6.360490000  | -1.206507000 |
| 1  | -2.933105000 | 6.095758000  | 0.648759000  |
| 6  | -1.261674000 | 7.870399000  | -0.596062000 |
| 1  | -0.774356000 | 8.181490000  | -1.525859000 |
| 1  | -2.329225000 | 8.099444000  | -0.672840000 |
| 1  | -0.850787000 | 8.493096000  | 0.209618000  |
| 6  | -3.004856000 | -0.640069000 | 4.441373000  |
| 6  | -1.822102000 | -1.296570000 | 3.991728000  |
| 6  | -1.588237000 | -1.482975000 | 2.654514000  |
| 7  | -2.471024000 | -1.056639000 | 1.710564000  |
| 6  | -3.598154000 | -0.410097000 | 2.099423000  |
| 6  | -3.893383000 | -0.193936000 | 3.419598000  |
| 1  | -1.075037000 | -1.651208000 | 4.688430000  |
| 1  | -0.677353000 | -1.955688000 | 2.285439000  |
| 1  | -4.256075000 | -0.068746000 | 1.311758000  |
| 1  | -4.810288000 | 0.328330000  | 3.654420000  |
| 7  | -3.264513000 | -0.445772000 | 5.749800000  |
| 6  | -4.485691000 | 0.246932000  | 6.166681000  |
| 1  | -4.509405000 | 0.296575000  | 7.254088000  |

|   |              |              |              |
|---|--------------|--------------|--------------|
| 1 | -4.514158000 | 1.269572000  | 5.773875000  |
| 1 | -5.378843000 | -0.288905000 | 5.826548000  |
| 6 | -2.318868000 | -0.909110000 | 6.767922000  |
| 1 | -2.718372000 | -0.673849000 | 7.753158000  |
| 1 | -2.172422000 | -1.992944000 | 6.705008000  |
| 1 | -1.347518000 | -0.413376000 | 6.661129000  |
| 6 | 1.693265000  | -5.339556000 | -3.524382000 |
| 6 | 1.501090000  | -5.443071000 | -2.137583000 |
| 6 | 1.450858000  | -4.270950000 | -1.388120000 |
| 6 | 1.577335000  | -2.981114000 | -1.994913000 |
| 6 | 1.781260000  | -2.905035000 | -3.381321000 |
| 6 | 1.837859000  | -4.084420000 | -4.132625000 |
| 1 | 1.734674000  | -6.243065000 | -4.127149000 |
| 1 | 1.401406000  | -6.415244000 | -1.661555000 |
| 1 | 1.904627000  | -1.938374000 | -3.864530000 |
| 1 | 1.995167000  | -4.023723000 | -5.207134000 |
| 6 | 1.473874000  | -2.028557000 | -0.930709000 |
| 6 | 1.311952000  | -2.712416000 | 0.303734000  |
| 7 | 1.299085000  | -4.093646000 | -0.022408000 |
| 8 | 1.172838000  | -2.283648000 | 1.481284000  |
| 7 | 1.687216000  | -0.633960000 | -1.041947000 |
| 6 | 0.935981000  | 0.159121000  | -1.784165000 |
| 1 | 0.198854000  | -0.319002000 | -2.419765000 |
| 6 | 1.640271000  | 1.324468000  | -2.455272000 |
| 9 | 2.494250000  | 1.970059000  | -1.642896000 |
| 9 | 2.371802000  | 0.821625000  | -3.486127000 |
| 9 | 0.801119000  | 2.225797000  | -2.986180000 |
| 6 | 1.101942000  | -5.140860000 | 0.952420000  |
| 1 | 1.039771000  | -4.662609000 | 1.931864000  |
| 1 | 0.174953000  | -5.697536000 | 0.764293000  |
| 1 | 1.939180000  | -5.849789000 | 0.951321000  |
| 1 | 2.488278000  | -0.236151000 | -0.505656000 |
| 6 | 5.679010000  | 1.458896000  | 1.548246000  |
| 6 | 4.437190000  | 1.142947000  | 1.019883000  |
| 6 | 5.214057000  | -0.798013000 | 0.104476000  |
| 6 | 6.496806000  | -0.584946000 | 0.583474000  |
| 6 | 6.775592000  | 0.583037000  | 1.339029000  |
| 1 | 5.790865000  | 2.375300000  | 2.114302000  |
| 1 | 3.591538000  | 1.807965000  | 1.175373000  |
| 1 | 5.002169000  | -1.693966000 | -0.476070000 |
| 1 | 7.265415000  | -1.317327000 | 0.370613000  |
| 7 | 4.176852000  | 0.034702000  | 0.302267000  |
| 7 | 8.021529000  | 0.847214000  | 1.833089000  |
| 6 | 8.259796000  | 2.059177000  | 2.607820000  |



|  |    |              |              |              |
|--|----|--------------|--------------|--------------|
|  | 1  | 9.308209000  | 2.091812000  | 2.904340000  |
|  | 1  | 8.042634000  | 2.961554000  | 2.021890000  |
|  | 1  | 7.646389000  | 2.084794000  | 3.517845000  |
|  | 6  | 9.116337000  | -0.085486000 | 1.593364000  |
|  | 1  | 8.905605000  | -1.074729000 | 2.020028000  |
|  | 1  | 9.313150000  | -0.209442000 | 0.520611000  |
|  | 1  | 10.021949000 | 0.300000000  | 2.061717000  |
|  | 6  | -2.515628000 | 1.072594000  | 2.919827000  |
|  | 6  | -2.408153000 | 0.030655000  | 1.971561000  |
|  | 6  | -3.387264000 | -0.983410000 | 1.979116000  |
|  | 6  | -4.429665000 | -0.922396000 | 2.892186000  |
|  | 6  | -4.526663000 | 0.135938000  | 3.815808000  |
|  | 6  | -3.567921000 | 1.140418000  | 3.840959000  |
|  | 6  | -0.468610000 | 1.281852000  | 1.466106000  |
|  | 6  | -1.230362000 | 0.182136000  | 1.132538000  |
|  | 1  | -3.320507000 | -1.806987000 | 1.281647000  |
|  | 1  | -5.182095000 | -1.705634000 | 2.895552000  |
|  | 1  | -5.353088000 | 0.164458000  | 4.519928000  |
|  | 1  | -3.627262000 | 1.953418000  | 4.558159000  |
|  | 16 | -1.166987000 | 2.180091000  | 2.808953000  |
|  | 6  | 0.873398000  | 1.727839000  | 0.917340000  |
|  | 1  | 1.466779000  | 0.844140000  | 0.658181000  |
|  | 6  | 1.693836000  | 2.524003000  | 1.936696000  |
|  | 6  | 1.644147000  | 3.920412000  | 2.030130000  |
|  | 6  | 2.508188000  | 1.811862000  | 2.829032000  |
|  | 6  | 2.383126000  | 4.591391000  | 3.008627000  |
|  | 1  | 1.040993000  | 4.501142000  | 1.338961000  |
|  | 6  | 3.241263000  | 2.481703000  | 3.807536000  |
|  | 1  | 2.582206000  | 0.733625000  | 2.736839000  |
|  | 6  | 3.179679000  | 3.874822000  | 3.902015000  |
|  | 1  | 2.335290000  | 5.675167000  | 3.065927000  |
|  | 1  | 3.869486000  | 1.915866000  | 4.489897000  |
|  | 1  | 3.755082000  | 4.397257000  | 4.661142000  |
|  | 7  | -0.908074000 | -0.743721000 | 0.084621000  |
|  | 16 | -1.614965000 | -0.476713000 | -1.448897000 |
|  | 8  | -1.611833000 | 0.970029000  | -1.698119000 |
|  | 8  | -0.941784000 | -1.387488000 | -2.385802000 |
|  | 6  | -3.329671000 | -0.983981000 | -1.367284000 |
|  | 6  | -3.652549000 | -2.342985000 | -1.454026000 |
|  | 6  | -4.324909000 | -0.011616000 | -1.267249000 |
|  | 6  | -4.991587000 | -2.719278000 | -1.424729000 |
|  | 1  | -2.873211000 | -3.091257000 | -1.538426000 |
|  | 6  | -5.661226000 | -0.410190000 | -1.244086000 |
|  | 1  | -4.057721000 | 1.037538000  | -1.213853000 |

INT-1

|   |              |              |              |
|---|--------------|--------------|--------------|
| 6 | -6.016622000 | -1.763293000 | -1.321135000 |
| 1 | -5.247221000 | -3.773606000 | -1.489386000 |
| 1 | -6.438517000 | 0.345037000  | -1.166593000 |
| 6 | -7.463914000 | -2.190005000 | -1.317813000 |
| 1 | -7.784475000 | -2.485780000 | -2.324926000 |
| 1 | -7.621535000 | -3.054230000 | -0.663544000 |
| 1 | -8.119389000 | -1.380356000 | -0.984603000 |
| 6 | 0.750046000  | 3.959069000  | -2.765992000 |
| 6 | 1.771275000  | 3.008750000  | -2.468113000 |
| 6 | 1.753114000  | 2.305064000  | -1.293209000 |
| 7 | 0.758937000  | 2.476822000  | -0.377022000 |
| 6 | -0.239254000 | 3.360741000  | -0.632620000 |
| 6 | -0.271205000 | 4.105298000  | -1.781362000 |
| 1 | 2.583384000  | 2.820557000  | -3.156820000 |
| 1 | 2.517103000  | 1.578248000  | -1.016038000 |
| 1 | -1.016847000 | 3.441005000  | 0.115151000  |
| 1 | -1.098198000 | 4.787931000  | -1.919247000 |
| 7 | 0.747837000  | 4.672659000  | -3.909089000 |
| 6 | -0.317882000 | 5.641570000  | -4.174914000 |
| 1 | -0.121880000 | 6.128526000  | -5.128777000 |
| 1 | -1.295206000 | 5.149216000  | -4.232340000 |
| 1 | -0.352968000 | 6.411227000  | -3.396246000 |
| 6 | 1.806519000  | 4.481182000  | -4.903368000 |
| 1 | 1.617887000  | 5.139562000  | -5.749801000 |
| 1 | 2.789012000  | 4.728101000  | -4.485973000 |
| 1 | 1.824583000  | 3.447843000  | -5.267073000 |
| 6 | 5.153737000  | -5.300056000 | -0.817267000 |
| 6 | 5.586344000  | -4.040137000 | -0.373421000 |
| 6 | 4.649858000  | -3.015396000 | -0.277337000 |
| 6 | 3.264944000  | -3.207731000 | -0.598495000 |
| 6 | 2.865161000  | -4.478261000 | -1.049816000 |
| 6 | 3.807973000  | -5.507254000 | -1.154378000 |
| 1 | 5.868923000  | -6.114529000 | -0.902318000 |
| 1 | 6.629615000  | -3.868719000 | -0.118402000 |
| 1 | 1.826557000  | -4.663088000 | -1.311200000 |
| 1 | 3.488206000  | -6.487666000 | -1.502307000 |
| 6 | 2.613878000  | -1.948821000 | -0.396195000 |
| 6 | 3.587104000  | -0.996987000 | -0.008538000 |
| 7 | 4.819950000  | -1.693597000 | 0.095686000  |
| 8 | 3.504497000  | 0.246563000  | 0.236409000  |
| 7 | 1.270467000  | -1.578515000 | -0.712287000 |
| 6 | 0.220631000  | -1.710036000 | 0.266925000  |
| 1 | 0.638785000  | -1.465944000 | 1.244989000  |
| 6 | -0.322499000 | -3.151916000 | 0.432960000  |

|  |   |              |              |              |
|--|---|--------------|--------------|--------------|
|  | 9 | -0.661581000 | -3.731035000 | -0.744467000 |
|  | 9 | 0.618676000  | -3.930901000 | 1.002077000  |
|  | 9 | -1.412504000 | -3.210354000 | 1.232084000  |
|  | 6 | 6.063653000  | -1.070411000 | 0.479167000  |
|  | 1 | 5.849733000  | -0.017604000 | 0.674112000  |
|  | 1 | 6.483181000  | -1.525344000 | 1.386209000  |
|  | 1 | 6.814818000  | -1.141428000 | -0.318712000 |
|  | 1 | 0.953818000  | -1.888313000 | -1.624604000 |
|  | 6 | 5.647100000  | -2.693575000 | -0.006601000 |
|  | 6 | 5.432496000  | -1.484007000 | 0.660568000  |
|  | 6 | 4.115744000  | -1.104476000 | 0.910545000  |
|  | 6 | 3.020240000  | -1.906267000 | 0.480894000  |
|  | 6 | 3.261155000  | -3.118419000 | -0.188295000 |
|  | 6 | 4.578120000  | -3.507346000 | -0.420838000 |
|  | 1 | 6.666164000  | -3.012565000 | -0.206200000 |
|  | 1 | 6.267651000  | -0.871152000 | 0.982921000  |
|  | 1 | 2.440408000  | -3.758331000 | -0.501230000 |
|  | 1 | 4.783304000  | -4.449004000 | -0.921162000 |
|  | 6 | 1.829968000  | -1.246256000 | 0.914933000  |
|  | 6 | 2.243514000  | -0.079032000 | 1.728235000  |
|  | 7 | 3.636884000  | -0.011359000 | 1.616387000  |
|  | 8 | 1.550556000  | 0.666883000  | 2.431017000  |
|  | 7 | 0.581161000  | -1.817148000 | 0.946351000  |
|  | 6 | -0.598252000 | -1.011526000 | 1.206786000  |
|  | 1 | -0.306501000 | -0.266813000 | 1.950113000  |
|  | 6 | -1.655599000 | -1.879847000 | 1.915351000  |
|  | 9 | -2.836644000 | -1.237638000 | 1.998427000  |
|  | 9 | -1.876146000 | -3.067897000 | 1.314605000  |
|  | 9 | -1.241094000 | -2.143336000 | 3.169519000  |
|  | 6 | 4.439052000  | 1.039857000  | 2.209546000  |
|  | 1 | 3.758091000  | 1.718387000  | 2.725148000  |
|  | 1 | 5.152434000  | 0.628781000  | 2.931439000  |
|  | 1 | 4.983694000  | 1.591508000  | 1.436895000  |
|  | 6 | -0.880601000 | 3.455014000  | 0.482149000  |
|  | 6 | -1.532899000 | 2.200598000  | 0.530461000  |
|  | 6 | -2.836181000 | 2.126221000  | 1.065152000  |
|  | 6 | -3.454611000 | 3.285485000  | 1.509666000  |
|  | 6 | -2.797478000 | 4.529495000  | 1.437080000  |
|  | 6 | -1.503736000 | 4.623775000  | 0.927811000  |
|  | 6 | 0.576148000  | 1.538669000  | -0.369899000 |
|  | 6 | -0.694548000 | 1.148245000  | 0.044296000  |
|  | 1 | -3.331192000 | 1.164193000  | 1.138027000  |
|  | 1 | -4.456789000 | 3.231716000  | 1.925969000  |
|  | 1 | -3.299823000 | 5.425200000  | 1.791438000  |

TS-2

|   |    |              |              |              |
|---|----|--------------|--------------|--------------|
|   | 1  | -0.993699000 | 5.581400000  | 0.885594000  |
|   | 16 | 0.750241000  | 3.292433000  | -0.154083000 |
|   | 6  | 1.572221000  | 0.661596000  | -0.911794000 |
|   | 1  | 1.151033000  | -0.249110000 | -1.317943000 |
|   | 6  | 2.885332000  | 0.982866000  | -1.432074000 |
|   | 6  | 3.530561000  | 0.006270000  | -2.233507000 |
|   | 6  | 3.597957000  | 2.185254000  | -1.189408000 |
|   | 6  | 4.796784000  | 0.218344000  | -2.768924000 |
|   | 1  | 3.018983000  | -0.932267000 | -2.427350000 |
|   | 6  | 4.858716000  | 2.398825000  | -1.739170000 |
|   | 1  | 3.176936000  | 2.960737000  | -0.560647000 |
|   | 6  | 5.470256000  | 1.419226000  | -2.528879000 |
|   | 1  | 5.261711000  | -0.556572000 | -3.372212000 |
|   | 1  | 5.371688000  | 3.338156000  | -1.547718000 |
|   | 1  | 6.459205000  | 1.589816000  | -2.944606000 |
|   | 7  | -1.107746000 | -0.226041000 | 0.082375000  |
|   | 16 | -1.710996000 | -0.946225000 | -1.355003000 |
|   | 8  | -1.325597000 | -0.055992000 | -2.454801000 |
|   | 8  | -1.254744000 | -2.346024000 | -1.328513000 |
|   | 6  | -3.494539000 | -0.934121000 | -1.259971000 |
|   | 6  | -4.175076000 | -2.076515000 | -0.835324000 |
|   | 6  | -4.184339000 | 0.223604000  | -1.634980000 |
|   | 6  | -5.567480000 | -2.049307000 | -0.783136000 |
|   | 1  | -3.628366000 | -2.970313000 | -0.559854000 |
|   | 6  | -5.574209000 | 0.230952000  | -1.568429000 |
|   | 1  | -3.644837000 | 1.097341000  | -1.983636000 |
|   | 6  | -6.287706000 | -0.900314000 | -1.139635000 |
|   | 1  | -6.102266000 | -2.939696000 | -0.464077000 |
|   | 1  | -6.114025000 | 1.127423000  | -1.861737000 |
|   | 6  | -7.793303000 | -0.872385000 | -1.049886000 |
|   | 1  | -8.214037000 | -1.881388000 | -1.090214000 |
|   | 1  | -8.116567000 | -0.417709000 | -0.104349000 |
|   | 1  | -8.230867000 | -0.280883000 | -1.860505000 |
|   | 1  | 0.422055000  | -2.570852000 | 0.284582000  |
|   | 6  | 5.234365000  | -3.183659000 | -0.884453000 |
|   | 6  | 5.144586000  | -2.546691000 | 0.361530000  |
|   | 6  | 4.015243000  | -1.774735000 | 0.606736000  |
|   | 6  | 2.998905000  | -1.623468000 | -0.346403000 |
|   | 6  | 3.094952000  | -2.262183000 | -1.573608000 |
|   | 6  | 4.226620000  | -3.048396000 | -1.841298000 |
|   | 1  | 6.106103000  | -3.793603000 | -1.103368000 |
|   | 1  | 5.928599000  | -2.658687000 | 1.103161000  |
|   | 1  | 2.314378000  | -2.159192000 | -2.323134000 |
|   | 1  | 4.317262000  | -3.551795000 | -2.798908000 |
| 4 |    |              |              |              |

|    |              |              |              |
|----|--------------|--------------|--------------|
| 6  | 1.899485000  | -0.756086000 | 0.242624000  |
| 6  | 2.485349000  | -0.414860000 | 1.641593000  |
| 7  | 3.691994000  | -1.053101000 | 1.770001000  |
| 8  | 1.951975000  | 0.284848000  | 2.496896000  |
| 7  | 0.735045000  | -1.634855000 | 0.473984000  |
| 6  | -0.459594000 | -1.064872000 | 1.034766000  |
| 1  | -0.168887000 | -0.441082000 | 1.881923000  |
| 6  | -1.305695000 | -2.182451000 | 1.672901000  |
| 9  | -2.529248000 | -1.735661000 | 2.016420000  |
| 9  | -1.474587000 | -3.264415000 | 0.882972000  |
| 9  | -0.695432000 | -2.609252000 | 2.796871000  |
| 6  | 4.511802000  | -0.995574000 | 2.967631000  |
| 1  | 3.998970000  | -0.359373000 | 3.689289000  |
| 1  | 4.643151000  | -1.996469000 | 3.391534000  |
| 1  | 5.494458000  | -0.570675000 | 2.738855000  |
| 6  | -0.742775000 | 3.512057000  | 0.660982000  |
| 6  | -1.509252000 | 2.326172000  | 0.661100000  |
| 6  | -2.847425000 | 2.372581000  | 1.091670000  |
| 6  | -3.390094000 | 3.588582000  | 1.486351000  |
| 6  | -2.617426000 | 4.765581000  | 1.465052000  |
| 6  | -1.286867000 | 4.738059000  | 1.058356000  |
| 6  | 0.577331000  | 1.487710000  | -0.077682000 |
| 6  | -0.728200000 | 1.198913000  | 0.214586000  |
| 1  | -3.436214000 | 1.461272000  | 1.120665000  |
| 1  | -4.422620000 | 3.632936000  | 1.820753000  |
| 1  | -3.061806000 | 5.706521000  | 1.776364000  |
| 1  | -0.686946000 | 5.643311000  | 1.053309000  |
| 16 | 0.909293000  | 3.202454000  | 0.146951000  |
| 6  | 1.619946000  | 0.531012000  | -0.644759000 |
| 1  | 1.170950000  | 0.124932000  | -1.560933000 |
| 6  | 2.905491000  | 1.238577000  | -1.071586000 |
| 6  | 3.240912000  | 1.289231000  | -2.432159000 |
| 6  | 3.770660000  | 1.847934000  | -0.147949000 |
| 6  | 4.406628000  | 1.924110000  | -2.862397000 |
| 1  | 2.582247000  | 0.827093000  | -3.163025000 |
| 6  | 4.938831000  | 2.482438000  | -0.576943000 |
| 1  | 3.532908000  | 1.843485000  | 0.910985000  |
| 6  | 5.261923000  | 2.521861000  | -1.934291000 |
| 1  | 4.644815000  | 1.951021000  | -3.922127000 |
| 1  | 5.594211000  | 2.947466000  | 0.154253000  |
| 1  | 6.170638000  | 3.016195000  | -2.266183000 |
| 7  | -1.248799000 | -0.135442000 | 0.181246000  |
| 16 | -1.889573000 | -0.659863000 | -1.337507000 |
| 8  | -1.643949000 | 0.424588000  | -2.296000000 |

|  |   |              |              |              |
|--|---|--------------|--------------|--------------|
|  | 8 | -1.353719000 | -2.007710000 | -1.595590000 |
|  | 6 | -3.657681000 | -0.806393000 | -1.116053000 |
|  | 6 | -4.204566000 | -2.016622000 | -0.681463000 |
|  | 6 | -4.472079000 | 0.287612000  | -1.419933000 |
|  | 6 | -5.586626000 | -2.119197000 | -0.543157000 |
|  | 1 | -3.564948000 | -2.863301000 | -0.463809000 |
|  | 6 | -5.851868000 | 0.162990000  | -1.273344000 |
|  | 1 | -4.035956000 | 1.213281000  | -1.778312000 |
|  | 6 | -6.430911000 | -1.035466000 | -0.829646000 |
|  | 1 | -6.016716000 | -3.060863000 | -0.212827000 |
|  | 1 | -6.488970000 | 1.008973000  | -1.516361000 |
|  | 6 | -7.924224000 | -1.152426000 | -0.648442000 |
|  | 1 | -8.271853000 | -2.171278000 | -0.845969000 |
|  | 1 | -8.209507000 | -0.904716000 | 0.382356000  |
|  | 1 | -8.462481000 | -0.467338000 | -1.310411000 |
|  | 1 | 0.517486000  | -2.179712000 | -0.356508000 |
|  | 6 | 4.938565000  | -2.746656000 | 0.515735000  |
|  | 6 | 4.266815000  | -3.202522000 | -0.627705000 |
|  | 6 | 2.959348000  | -2.767811000 | -0.821550000 |
|  | 6 | 2.321132000  | -1.899532000 | 0.075656000  |
|  | 6 | 2.997329000  | -1.457977000 | 1.202925000  |
|  | 6 | 4.315524000  | -1.888421000 | 1.423981000  |
|  | 1 | 5.959587000  | -3.072433000 | 0.694054000  |
|  | 1 | 4.752183000  | -3.873766000 | -1.328864000 |
|  | 1 | 2.518111000  | -0.785371000 | 1.908689000  |
|  | 1 | 4.852218000  | -1.549409000 | 2.305119000  |
|  | 6 | 0.925349000  | -1.582281000 | -0.442498000 |
|  | 6 | 0.850088000  | -2.509187000 | -1.691498000 |
|  | 7 | 2.083142000  | -3.100450000 | -1.867136000 |
|  | 8 | -0.109381000 | -2.667259000 | -2.440261000 |
|  | 7 | 0.921840000  | -0.171085000 | -0.894600000 |
|  | 6 | -0.170723000 | 0.252506000  | -1.514160000 |
|  | 1 | -0.788235000 | -0.457027000 | -2.068776000 |
|  | 6 | -0.002897000 | 1.504393000  | -2.369595000 |
|  | 9 | -1.164858000 | 2.135420000  | -2.638394000 |
|  | 9 | 0.849626000  | 2.420316000  | -1.877674000 |
|  | 9 | 0.502545000  | 1.110636000  | -3.571388000 |
|  | 6 | 2.406548000  | -3.977855000 | -2.976338000 |
|  | 1 | 1.524172000  | -4.041842000 | -3.613835000 |
|  | 1 | 3.246019000  | -3.576566000 | -3.554246000 |
|  | 1 | 2.668459000  | -4.978661000 | -2.615834000 |
|  | 6 | -4.057305000 | -2.211923000 | -0.367731000 |
|  | 6 | -3.683499000 | -0.860824000 | -0.541161000 |
|  | 6 | -4.639481000 | 0.051048000  | -1.025901000 |

TS-3

|    |              |              |              |
|----|--------------|--------------|--------------|
| 6  | -5.927994000 | -0.390058000 | -1.300084000 |
| 6  | -6.287823000 | -1.736923000 | -1.102547000 |
| 6  | -5.354830000 | -2.659797000 | -0.639173000 |
| 6  | -1.629076000 | -1.771036000 | 0.180295000  |
| 6  | -2.293582000 | -0.631891000 | -0.197553000 |
| 1  | -4.358942000 | 1.086769000  | -1.185717000 |
| 1  | -6.668050000 | 0.311630000  | -1.675169000 |
| 1  | -7.301288000 | -2.062450000 | -1.320006000 |
| 1  | -5.626063000 | -3.702164000 | -0.497100000 |
| 16 | -2.700431000 | -3.177158000 | 0.186750000  |
| 6  | -0.179536000 | -1.878188000 | 0.652284000  |
| 1  | -0.057726000 | -1.047920000 | 1.358108000  |
| 6  | 0.071082000  | -3.163854000 | 1.439266000  |
| 6  | 0.194125000  | -3.100029000 | 2.834858000  |
| 6  | 0.167446000  | -4.421326000 | 0.821839000  |
| 6  | 0.413444000  | -4.251067000 | 3.593427000  |
| 1  | 0.114727000  | -2.136510000 | 3.332422000  |
| 6  | 0.388574000  | -5.574898000 | 1.577734000  |
| 1  | 0.059436000  | -4.510559000 | -0.254754000 |
| 6  | 0.514197000  | -5.494667000 | 2.965940000  |
| 1  | 0.505831000  | -4.174847000 | 4.673552000  |
| 1  | 0.461390000  | -6.537127000 | 1.077998000  |
| 1  | 0.686820000  | -6.392568000 | 3.552909000  |
| 7  | -1.645107000 | 0.618754000  | -0.396008000 |
| 16 | -1.524585000 | 1.623064000  | 0.901373000  |
| 8  | -1.497154000 | 0.897752000  | 2.194858000  |
| 8  | -0.413871000 | 2.561584000  | 0.623185000  |
| 6  | -3.019440000 | 2.628861000  | 0.915162000  |
| 6  | -3.252445000 | 3.518201000  | -0.141181000 |
| 6  | -3.921215000 | 2.530188000  | 1.971945000  |
| 6  | -4.398820000 | 4.305724000  | -0.127923000 |
| 1  | -2.548796000 | 3.580884000  | -0.965005000 |
| 6  | -5.067818000 | 3.329243000  | 1.970205000  |
| 1  | -3.725013000 | 1.840317000  | 2.785341000  |
| 6  | -5.325891000 | 4.225827000  | 0.927027000  |
| 1  | -4.580167000 | 4.996061000  | -0.948285000 |
| 1  | -5.770280000 | 3.251990000  | 2.796167000  |
| 6  | -6.563202000 | 5.091488000  | 0.925650000  |
| 1  | -7.161758000 | 4.925577000  | 0.021920000  |
| 1  | -7.196225000 | 4.885564000  | 1.793648000  |
| 1  | -6.300692000 | 6.156383000  | 0.943927000  |
| 1  | 2.202554000  | 0.865772000  | -0.487412000 |
| 6  | 5.188921000  | 3.191753000  | 0.326496000  |
| 6  | 5.360910000  | 1.973825000  | -0.397073000 |

|  |   |              |              |              |
|--|---|--------------|--------------|--------------|
|  | 6 | 4.277491000  | 1.173793000  | -0.662118000 |
|  | 7 | 3.033524000  | 1.508025000  | -0.257006000 |
|  | 6 | 2.823316000  | 2.653188000  | 0.429827000  |
|  | 6 | 3.858233000  | 3.502398000  | 0.736613000  |
|  | 1 | 6.334163000  | 1.657339000  | -0.745370000 |
|  | 1 | 4.367956000  | 0.239270000  | -1.202713000 |
|  | 1 | 1.793821000  | 2.847799000  | 0.709409000  |
|  | 1 | 3.636583000  | 4.405192000  | 1.288667000  |
|  | 7 | 6.230245000  | 4.005882000  | 0.606996000  |
|  | 6 | 6.018174000  | 5.244451000  | 1.357624000  |
|  | 1 | 6.974885000  | 5.749162000  | 1.483519000  |
|  | 1 | 5.339698000  | 5.919998000  | 0.824246000  |
|  | 1 | 5.603559000  | 5.040094000  | 2.351300000  |
|  | 6 | 7.581969000  | 3.655774000  | 0.167960000  |
|  | 1 | 8.268373000  | 4.442738000  | 0.476946000  |
|  | 1 | 7.914084000  | 2.712677000  | 0.617247000  |
|  | 1 | 7.632755000  | 3.564011000  | -0.922904000 |
|  | 6 | -4.351828000 | -2.793664000 | -2.222267000 |
|  | 6 | -3.904744000 | -3.683208000 | -1.235186000 |
|  | 6 | -2.813688000 | -3.292275000 | -0.467788000 |
|  | 6 | -2.173274000 | -2.060591000 | -0.655087000 |
|  | 6 | -2.613892000 | -1.196543000 | -1.647088000 |
|  | 6 | -3.717390000 | -1.567531000 | -2.431224000 |
|  | 1 | -5.203417000 | -3.071480000 | -2.836777000 |
|  | 1 | -4.393845000 | -4.639779000 | -1.083492000 |
|  | 1 | -2.109729000 | -0.251395000 | -1.827173000 |
|  | 1 | -4.074324000 | -0.898142000 | -3.207991000 |
|  | 6 | -1.018996000 | -1.947442000 | 0.324164000  |
|  | 6 | -1.115770000 | -3.308209000 | 1.078296000  |
|  | 7 | -2.177692000 | -4.006756000 | 0.563329000  |
|  | 8 | -0.399284000 | -3.690518000 | 1.997753000  |
|  | 7 | -1.226007000 | -0.815290000 | 1.246202000  |
|  | 6 | -0.566756000 | -0.804482000 | 2.333833000  |
|  | 1 | 0.073657000  | -1.613034000 | 2.682269000  |
|  | 6 | -0.679625000 | 0.353379000  | 3.296518000  |
|  | 9 | 0.548484000  | 0.815642000  | 3.606060000  |
|  | 9 | -1.404929000 | 1.382152000  | 2.828719000  |
|  | 9 | -1.253688000 | -0.064451000 | 4.448757000  |
|  | 6 | -2.576560000 | -5.322828000 | 1.030290000  |
|  | 1 | -1.902928000 | -5.605726000 | 1.839299000  |
|  | 1 | -3.605804000 | -5.301263000 | 1.402802000  |
|  | 1 | -2.503611000 | -6.055914000 | 0.220271000  |
|  | 6 | 3.647280000  | -1.202487000 | 1.747336000  |
|  | 6 | 3.116594000  | 0.068892000  | 1.445359000  |

INT-3



|    |              |              |              |
|----|--------------|--------------|--------------|
| 6  | 3.758815000  | 1.212609000  | 1.950585000  |
| 6  | 4.904257000  | 1.071557000  | 2.724038000  |
| 6  | 5.426222000  | -0.205332000 | 3.007022000  |
| 6  | 4.803008000  | -1.352004000 | 2.522884000  |
| 6  | 1.543971000  | -1.299892000 | 0.346355000  |
| 6  | 1.914837000  | 0.006864000  | 0.621816000  |
| 1  | 3.346192000  | 2.191078000  | 1.726444000  |
| 1  | 5.403589000  | 1.953181000  | 3.116826000  |
| 1  | 6.323799000  | -0.299292000 | 3.612241000  |
| 1  | 5.202349000  | -2.337643000 | 2.745175000  |
| 16 | 2.674787000  | -2.480577000 | 1.041568000  |
| 6  | 0.351600000  | -1.704249000 | -0.481543000 |
| 1  | 0.122905000  | -0.806548000 | -1.057013000 |
| 6  | 0.638140000  | -2.805225000 | -1.504187000 |
| 6  | 0.723252000  | -2.448331000 | -2.859038000 |
| 6  | 0.849832000  | -4.148946000 | -1.156789000 |
| 6  | 1.001627000  | -3.403391000 | -3.838281000 |
| 1  | 0.583952000  | -1.408204000 | -3.138021000 |
| 6  | 1.126266000  | -5.105961000 | -2.136593000 |
| 1  | 0.808016000  | -4.462215000 | -0.118865000 |
| 6  | 1.200854000  | -4.738747000 | -3.481197000 |
| 1  | 1.061887000  | -3.102359000 | -4.880981000 |
| 1  | 1.285442000  | -6.140339000 | -1.843543000 |
| 1  | 1.415342000  | -5.484597000 | -4.241806000 |
| 7  | 1.195667000  | 1.164796000  | 0.311513000  |
| 16 | 1.226442000  | 1.831890000  | -1.124356000 |
| 8  | 0.990682000  | 0.901078000  | -2.271928000 |
| 8  | 0.310643000  | 3.008179000  | -1.078255000 |
| 6  | 2.870252000  | 2.519943000  | -1.445567000 |
| 6  | 3.188506000  | 3.805627000  | -0.995409000 |
| 6  | 3.841331000  | 1.744330000  | -2.081586000 |
| 6  | 4.474009000  | 4.307321000  | -1.187110000 |
| 1  | 2.428047000  | 4.409768000  | -0.511141000 |
| 6  | 5.127342000  | 2.257089000  | -2.263648000 |
| 1  | 3.588694000  | 0.752739000  | -2.442136000 |
| 6  | 5.465958000  | 3.542990000  | -1.822733000 |
| 1  | 4.712064000  | 5.310529000  | -0.840509000 |
| 1  | 5.877964000  | 1.647599000  | -2.761366000 |
| 6  | 6.850258000  | 4.106425000  | -2.042708000 |
| 1  | 7.227418000  | 4.602366000  | -1.141211000 |
| 1  | 7.560984000  | 3.323382000  | -2.324126000 |
| 1  | 6.849309000  | 4.856378000  | -2.844462000 |
| 1  | -2.402998000 | 0.639669000  | 0.745697000  |
| 6  | -4.978371000 | 3.356759000  | -0.044149000 |

|  |   |              |              |              |
|--|---|--------------|--------------|--------------|
|  | 6 | -5.360182000 | 2.089445000  | 0.494503000  |
|  | 6 | -4.408377000 | 1.139841000  | 0.756775000  |
|  | 7 | -3.097386000 | 1.372985000  | 0.513209000  |
|  | 6 | -2.682369000 | 2.557171000  | 0.001028000  |
|  | 6 | -3.584461000 | 3.550035000  | -0.285554000 |
|  | 1 | -6.393665000 | 1.854349000  | 0.706408000  |
|  | 1 | -4.653783000 | 0.167895000  | 1.166673000  |
|  | 1 | -1.615607000 | 2.664473000  | -0.184263000 |
|  | 1 | -3.208735000 | 4.475523000  | -0.699150000 |
|  | 7 | -5.887334000 | 4.316086000  | -0.310259000 |
|  | 6 | -5.462168000 | 5.607885000  | -0.854684000 |
|  | 1 | -6.337943000 | 6.241971000  | -0.982441000 |
|  | 1 | -4.767141000 | 6.112649000  | -0.174693000 |
|  | 1 | -4.978659000 | 5.486013000  | -1.830298000 |
|  | 6 | -7.310344000 | 4.079023000  | -0.055989000 |
|  | 1 | -7.873116000 | 4.964389000  | -0.347278000 |
|  | 1 | -7.679097000 | 3.228712000  | -0.640251000 |
|  | 1 | -7.495231000 | 3.886428000  | 1.006776000  |
|  | 6 | -1.377467000 | -4.788680000 | 2.300923000  |
|  | 6 | -2.372223000 | -4.639378000 | 1.324023000  |
|  | 6 | -2.280269000 | -3.544742000 | 0.472075000  |
|  | 6 | -1.235234000 | -2.601115000 | 0.567602000  |
|  | 6 | -0.270426000 | -2.751574000 | 1.560801000  |
|  | 6 | -0.340958000 | -3.858508000 | 2.419181000  |
|  | 1 | -1.422470000 | -5.637453000 | 2.977868000  |
|  | 1 | -3.181833000 | -5.357405000 | 1.237795000  |
|  | 1 | 0.507774000  | -2.006177000 | 1.682859000  |
|  | 1 | 0.413018000  | -3.986694000 | 3.190932000  |
|  | 6 | -1.483799000 | -1.556228000 | -0.445164000 |
|  | 6 | -2.695560000 | -2.030498000 | -1.201366000 |
|  | 7 | -3.132232000 | -3.188475000 | -0.580428000 |
|  | 8 | -3.223322000 | -1.533567000 | -2.199716000 |
|  | 7 | -0.429677000 | -0.957534000 | -1.120865000 |
|  | 6 | -0.656311000 | -0.160946000 | -2.111097000 |
|  | 1 | -1.635245000 | 0.017172000  | -2.546511000 |
|  | 6 | 0.507572000  | 0.406434000  | -2.872194000 |
|  | 9 | 0.146877000  | 1.522135000  | -3.538794000 |
|  | 9 | 1.568526000  | 0.714595000  | -2.095044000 |
|  | 9 | 0.965204000  | -0.477016000 | -3.806917000 |
|  | 6 | -4.312362000 | -3.924874000 | -0.985737000 |
|  | 1 | -4.728315000 | -3.425775000 | -1.861764000 |
|  | 1 | -4.054771000 | -4.957498000 | -1.245129000 |
|  | 1 | -5.059256000 | -3.934243000 | -0.184001000 |
|  | 6 | -2.864556000 | 3.099604000  | -1.728679000 |

TS-4

|    |              |              |              |
|----|--------------|--------------|--------------|
| 6  | -1.539621000 | 3.204592000  | -1.271216000 |
| 6  | -0.726830000 | 4.246361000  | -1.746516000 |
| 6  | -1.240423000 | 5.148896000  | -2.669268000 |
| 6  | -2.568158000 | 5.029561000  | -3.119768000 |
| 6  | -3.391690000 | 4.008699000  | -2.653024000 |
| 6  | -2.242923000 | 1.261744000  | -0.077460000 |
| 6  | -1.172046000 | 2.183316000  | -0.286589000 |
| 1  | 0.292714000  | 4.327758000  | -1.384066000 |
| 1  | -0.615885000 | 5.954214000  | -3.045215000 |
| 1  | -2.959115000 | 5.743262000  | -3.839718000 |
| 1  | -4.417456000 | 3.920612000  | -2.998755000 |
| 16 | -3.707376000 | 1.749037000  | -0.995476000 |
| 6  | -2.219053000 | 0.099656000  | 0.739090000  |
| 1  | -1.320959000 | 0.025579000  | 1.338567000  |
| 6  | -3.401226000 | -0.430158000 | 1.469641000  |
| 6  | -3.244144000 | -0.696365000 | 2.842981000  |
| 6  | -4.664303000 | -0.658184000 | 0.892518000  |
| 6  | -4.312107000 | -1.148705000 | 3.617591000  |
| 1  | -2.277180000 | -0.524315000 | 3.306794000  |
| 6  | -5.730812000 | -1.115812000 | 1.666693000  |
| 1  | -4.812896000 | -0.512308000 | -0.171633000 |
| 6  | -5.562353000 | -1.358936000 | 3.032405000  |
| 1  | -4.165494000 | -1.337120000 | 4.677673000  |
| 1  | -6.696401000 | -1.285800000 | 1.198162000  |
| 1  | -6.396351000 | -1.712725000 | 3.632207000  |
| 7  | 0.046822000  | 2.332285000  | 0.277138000  |
| 16 | 0.592032000  | 1.700243000  | 1.651930000  |
| 8  | -0.305414000 | 1.917440000  | 2.818562000  |
| 8  | 1.090016000  | 0.294430000  | 1.525865000  |
| 6  | 2.051751000  | 2.716835000  | 1.885333000  |
| 6  | 3.026030000  | 2.780667000  | 0.882035000  |
| 6  | 2.232519000  | 3.385879000  | 3.092695000  |
| 6  | 4.179123000  | 3.527670000  | 1.099151000  |
| 1  | 2.873511000  | 2.262166000  | -0.059304000 |
| 6  | 3.397456000  | 4.131661000  | 3.295219000  |
| 1  | 1.469068000  | 3.326800000  | 3.860886000  |
| 6  | 4.385551000  | 4.215897000  | 2.308079000  |
| 1  | 4.933729000  | 3.581071000  | 0.317968000  |
| 1  | 3.535374000  | 4.656447000  | 4.237192000  |
| 6  | 5.641880000  | 5.025925000  | 2.522904000  |
| 1  | 5.712920000  | 5.846130000  | 1.797883000  |
| 1  | 5.670538000  | 5.460830000  | 3.526243000  |
| 1  | 6.538989000  | 4.408310000  | 2.395044000  |
| 1  | 1.399635000  | -1.332026000 | -0.640492000 |

|              |   |              |              |              |
|--------------|---|--------------|--------------|--------------|
|              | 6 | 4.844505000  | -2.995136000 | -0.845703000 |
|              | 6 | 3.829228000  | -3.224763000 | -1.824290000 |
|              | 6 | 2.612329000  | -2.605386000 | -1.710235000 |
|              | 7 | 2.341653000  | -1.770033000 | -0.680849000 |
|              | 6 | 3.274793000  | -1.510026000 | 0.264957000  |
|              | 6 | 4.513675000  | -2.095774000 | 0.213479000  |
|              | 1 | 3.994479000  | -3.882491000 | -2.666074000 |
|              | 1 | 1.817995000  | -2.741733000 | -2.433497000 |
|              | 1 | 2.970204000  | -0.817564000 | 1.040062000  |
|              | 1 | 5.225608000  | -1.857201000 | 0.991235000  |
|              | 7 | 6.050530000  | -3.592893000 | -0.920338000 |
|              | 6 | 7.069087000  | -3.334687000 | 0.100131000  |
|              | 1 | 7.958405000  | -3.917340000 | -0.134539000 |
|              | 1 | 7.346528000  | -2.274922000 | 0.123042000  |
|              | 1 | 6.715201000  | -3.630449000 | 1.093874000  |
|              | 6 | 6.358385000  | -4.506121000 | -2.023427000 |
|              | 1 | 7.372582000  | -4.881428000 | -1.897276000 |
|              | 1 | 5.672887000  | -5.360798000 | -2.031730000 |
|              | 1 | 6.298387000  | -3.993475000 | -2.989978000 |
|              | 6 | 1.201599000  | -5.206613000 | 1.672834000  |
|              | 6 | 2.281763000  | -4.832903000 | 0.859549000  |
|              | 6 | 2.102904000  | -3.771241000 | -0.020577000 |
|              | 6 | 0.870883000  | -3.062603000 | -0.121663000 |
|              | 6 | -0.187412000 | -3.452266000 | 0.707490000  |
|              | 6 | -0.016501000 | -4.521725000 | 1.595797000  |
|              | 1 | 1.316960000  | -6.034217000 | 2.367758000  |
|              | 1 | 3.230683000  | -5.358735000 | 0.917593000  |
|              | 1 | -1.138707000 | -2.931011000 | 0.672587000  |
|              | 1 | -0.843450000 | -4.819877000 | 2.235574000  |
|              | 6 | 1.060406000  | -2.033548000 | -1.121933000 |
|              | 6 | 2.427321000  | -2.146608000 | -1.613664000 |
|              | 7 | 3.012290000  | -3.216609000 | -0.915816000 |
|              | 8 | 3.029327000  | -1.485280000 | -2.483147000 |
|              | 7 | 0.124495000  | -1.152705000 | -1.548503000 |
|              | 6 | 0.361872000  | -0.211935000 | -2.424479000 |
|              | 1 | 1.322583000  | -0.068285000 | -2.908157000 |
|              | 6 | -0.748725000 | 0.660601000  | -2.872861000 |
|              | 9 | -1.574760000 | 0.077032000  | -3.802920000 |
|              | 9 | -1.589756000 | 1.043733000  | -1.865518000 |
|              | 9 | -0.276434000 | 1.789123000  | -3.450565000 |
|              | 6 | 4.380591000  | -3.642772000 | -1.103355000 |
|              | 1 | 4.823159000  | -2.990219000 | -1.857969000 |
|              | 1 | 4.952788000  | -3.557368000 | -0.171486000 |
|              | 1 | 4.431656000  | -4.682042000 | -1.450534000 |
| <b>INT-4</b> |   |              |              |              |

|    |              |              |              |
|----|--------------|--------------|--------------|
| 6  | 3.580991000  | -0.496122000 | 2.047781000  |
| 6  | 2.232631000  | -0.204597000 | 2.354665000  |
| 6  | 1.608223000  | -0.922494000 | 3.393238000  |
| 6  | 2.330163000  | -1.866862000 | 4.112820000  |
| 6  | 3.678436000  | -2.112345000 | 3.814253000  |
| 6  | 4.313288000  | -1.433173000 | 2.776549000  |
| 6  | 2.646583000  | 1.190261000  | 0.410785000  |
| 6  | 1.673448000  | 0.823898000  | 1.471640000  |
| 1  | 0.567089000  | -0.757631000 | 3.631046000  |
| 1  | 1.843271000  | -2.420713000 | 4.909098000  |
| 1  | 4.233619000  | -2.848889000 | 4.387773000  |
| 1  | 5.350963000  | -1.637619000 | 2.532353000  |
| 16 | 4.212633000  | 0.386571000  | 0.659014000  |
| 6  | 2.349643000  | 2.081641000  | -0.570177000 |
| 1  | 1.361376000  | 2.526844000  | -0.476650000 |
| 6  | 3.159322000  | 2.579380000  | -1.674882000 |
| 6  | 2.829098000  | 3.843400000  | -2.209689000 |
| 6  | 4.235134000  | 1.869232000  | -2.248900000 |
| 6  | 3.576511000  | 4.401314000  | -3.242603000 |
| 1  | 1.987893000  | 4.391054000  | -1.792975000 |
| 6  | 4.971461000  | 2.426070000  | -3.291855000 |
| 1  | 4.449387000  | 0.855898000  | -1.927460000 |
| 6  | 4.655393000  | 3.696081000  | -3.784080000 |
| 1  | 3.314712000  | 5.381611000  | -3.630391000 |
| 1  | 5.789327000  | 1.861607000  | -3.730615000 |
| 1  | 5.236102000  | 4.126203000  | -4.595144000 |
| 7  | 0.531198000  | 1.464704000  | 1.463559000  |
| 16 | -0.682213000 | 1.351887000  | 2.586564000  |
| 8  | -1.510383000 | 0.152085000  | 2.312146000  |
| 8  | -0.206839000 | 1.525085000  | 3.974590000  |
| 6  | -1.625639000 | 2.809737000  | 2.157534000  |
| 6  | -2.061211000 | 3.011322000  | 0.843480000  |
| 6  | -1.969132000 | 3.701160000  | 3.172369000  |
| 6  | -2.842103000 | 4.125940000  | 0.555430000  |
| 1  | -1.779857000 | 2.320872000  | 0.056706000  |
| 6  | -2.755954000 | 4.812462000  | 2.863371000  |
| 1  | -1.618595000 | 3.532226000  | 4.184304000  |
| 6  | -3.204937000 | 5.042841000  | 1.557502000  |
| 1  | -3.174539000 | 4.290635000  | -0.466398000 |
| 1  | -3.019509000 | 5.511568000  | 3.652497000  |
| 6  | -4.063425000 | 6.239383000  | 1.225864000  |
| 1  | -3.672728000 | 6.778594000  | 0.355526000  |
| 1  | -5.087272000 | 5.931186000  | 0.979131000  |
| 1  | -4.117715000 | 6.938161000  | 2.065545000  |

|  |   |              |              |              |
|--|---|--------------|--------------|--------------|
|  | 6 | -5.451142000 | -2.004668000 | -1.053264000 |
|  | 6 | -4.663517000 | -2.391227000 | -2.180472000 |
|  | 6 | -3.312551000 | -2.159868000 | -2.187017000 |
|  | 7 | -2.693608000 | -1.572084000 | -1.137796000 |
|  | 6 | -3.398670000 | -1.176202000 | -0.051552000 |
|  | 6 | -4.753710000 | -1.375264000 | 0.022388000  |
|  | 1 | -5.108186000 | -2.866410000 | -3.043496000 |
|  | 1 | -2.681039000 | -2.425841000 | -3.025456000 |
|  | 1 | -2.831741000 | -0.700344000 | 0.742277000  |
|  | 1 | -5.272372000 | -1.044149000 | 0.911162000  |
|  | 7 | -6.781662000 | -2.219620000 | -1.008615000 |
|  | 6 | -7.558807000 | -1.807921000 | 0.162854000  |
|  | 1 | -7.209956000 | -2.318003000 | 1.067626000  |
|  | 1 | -7.494871000 | -0.725308000 | 0.318909000  |
|  | 1 | -8.603413000 | -2.069968000 | 0.002748000  |
|  | 6 | -7.465303000 | -2.870932000 | -2.128387000 |
|  | 1 | -8.526755000 | -2.945504000 | -1.897668000 |
|  | 1 | -7.353385000 | -2.291087000 | -3.051259000 |
|  | 1 | -7.076530000 | -3.881822000 | -2.294641000 |
|  | 1 | -1.658487000 | -1.401680000 | -1.187346000 |
|  | 6 | 1.028738000  | -5.099287000 | 1.529721000  |
|  | 6 | 2.086730000  | -4.824550000 | 0.651342000  |
|  | 6 | 1.999568000  | -3.677278000 | -0.127211000 |
|  | 6 | 0.888108000  | -2.801126000 | -0.061378000 |
|  | 6 | -0.141636000 | -3.081591000 | 0.838762000  |
|  | 6 | -0.067777000 | -4.236393000 | 1.626990000  |
|  | 1 | 1.070689000  | -5.991806000 | 2.147828000  |
|  | 1 | 2.943543000  | -5.487681000 | 0.585201000  |
|  | 1 | -0.977819000 | -2.402383000 | 0.953160000  |
|  | 1 | -0.869146000 | -4.458964000 | 2.325788000  |
|  | 6 | 1.140614000  | -1.716403000 | -1.001245000 |
|  | 6 | 2.467715000  | -2.007070000 | -1.628086000 |
|  | 7 | 2.918916000  | -3.191026000 | -1.061718000 |
|  | 8 | 3.069573000  | -1.390920000 | -2.515277000 |
|  | 7 | 0.280623000  | -0.779029000 | -1.371884000 |
|  | 6 | 0.665285000  | 0.233717000  | -2.174892000 |
|  | 1 | 1.530135000  | 0.120374000  | -2.820734000 |
|  | 6 | -0.448563000 | 1.009426000  | -2.800294000 |
|  | 9 | -1.142053000 | 0.269173000  | -3.725299000 |
|  | 9 | -1.383609000 | 1.433942000  | -1.909533000 |
|  | 9 | 0.000319000  | 2.096602000  | -3.460024000 |
|  | 6 | 4.168962000  | -3.830714000 | -1.419258000 |
|  | 1 | 4.649900000  | -3.211802000 | -2.177652000 |
|  | 1 | 4.827426000  | -3.914706000 | -0.547586000 |

TS-5

|    |              |              |              |
|----|--------------|--------------|--------------|
| 1  | 3.992415000  | -4.832006000 | -1.827869000 |
| 6  | 3.824368000  | -0.292489000 | 1.763113000  |
| 6  | 2.490118000  | -0.232153000 | 2.231152000  |
| 6  | 2.169571000  | -0.923550000 | 3.416234000  |
| 6  | 3.158568000  | -1.610817000 | 4.109810000  |
| 6  | 4.483152000  | -1.627313000 | 3.643972000  |
| 6  | 4.823998000  | -0.972454000 | 2.464594000  |
| 6  | 2.338626000  | 0.948740000  | 0.150613000  |
| 6  | 1.625562000  | 0.543008000  | 1.332540000  |
| 1  | 1.158156000  | -0.916531000 | 3.797546000  |
| 1  | 2.901239000  | -2.142495000 | 5.021154000  |
| 1  | 5.247008000  | -2.164137000 | 4.199492000  |
| 1  | 5.842726000  | -0.997926000 | 2.088994000  |
| 16 | 4.061859000  | 0.519440000  | 0.225517000  |
| 6  | 1.746531000  | 1.704321000  | -0.874909000 |
| 1  | 0.800572000  | 2.141256000  | -0.568308000 |
| 6  | 2.515686000  | 2.509264000  | -1.851956000 |
| 6  | 2.170244000  | 3.862855000  | -2.020280000 |
| 6  | 3.586573000  | 1.994010000  | -2.605059000 |
| 6  | 2.894127000  | 4.685838000  | -2.881394000 |
| 1  | 1.334252000  | 4.272124000  | -1.458880000 |
| 6  | 4.306753000  | 2.818639000  | -3.470400000 |
| 1  | 3.826169000  | 0.936688000  | -2.543045000 |
| 6  | 3.969834000  | 4.167541000  | -3.607709000 |
| 1  | 2.616410000  | 5.731080000  | -2.987560000 |
| 1  | 5.128325000  | 2.401969000  | -4.047040000 |
| 1  | 4.532491000  | 4.806351000  | -4.282896000 |
| 7  | 0.353299000  | 0.944808000  | 1.442400000  |
| 16 | -0.637775000 | 0.867233000  | 2.718175000  |
| 8  | -1.529547000 | -0.325135000 | 2.619599000  |
| 8  | -0.000303000 | 1.063339000  | 4.044036000  |
| 6  | -1.659258000 | 2.317624000  | 2.431369000  |
| 6  | -2.192371000 | 2.588611000  | 1.166687000  |
| 6  | -1.973374000 | 3.130807000  | 3.519650000  |
| 6  | -3.038183000 | 3.681541000  | 1.002541000  |
| 1  | -1.929273000 | 1.968329000  | 0.318655000  |
| 6  | -2.825154000 | 4.222711000  | 3.337805000  |
| 1  | -1.547787000 | 2.916297000  | 4.493597000  |
| 6  | -3.372992000 | 4.515078000  | 2.083343000  |
| 1  | -3.443137000 | 3.895195000  | 0.016221000  |
| 1  | -3.062867000 | 4.857613000  | 4.187515000  |
| 6  | -4.303696000 | 5.688059000  | 1.889080000  |
| 1  | -3.986205000 | 6.312860000  | 1.046266000  |
| 1  | -5.324058000 | 5.349036000  | 1.669487000  |

|  |   |              |              |              |
|--|---|--------------|--------------|--------------|
|  | 1 | -4.346298000 | 6.317564000  | 2.782795000  |
|  | 6 | -5.291099000 | -1.961757000 | -1.203224000 |
|  | 6 | -4.431357000 | -2.062939000 | -2.339578000 |
|  | 6 | -3.111707000 | -1.709793000 | -2.237959000 |
|  | 7 | -2.590234000 | -1.260984000 | -1.071749000 |
|  | 6 | -3.365665000 | -1.144303000 | 0.034105000  |
|  | 6 | -4.695114000 | -1.479263000 | 0.001727000  |
|  | 1 | -4.796633000 | -2.415311000 | -3.293832000 |
|  | 1 | -2.428805000 | -1.759666000 | -3.075616000 |
|  | 1 | -2.872985000 | -0.782219000 | 0.931957000  |
|  | 1 | -5.271917000 | -1.370072000 | 0.909537000  |
|  | 7 | -6.593483000 | -2.302806000 | -1.266228000 |
|  | 6 | -7.446324000 | -2.190122000 | -0.080441000 |
|  | 1 | -7.081385000 | -2.830231000 | 0.730465000  |
|  | 1 | -7.490749000 | -1.155410000 | 0.276600000  |
|  | 1 | -8.455041000 | -2.506832000 | -0.340370000 |
|  | 6 | -7.170374000 | -2.796267000 | -2.519257000 |
|  | 1 | -8.224706000 | -3.015644000 | -2.359328000 |
|  | 1 | -7.090934000 | -2.045626000 | -3.313392000 |
|  | 1 | -6.672609000 | -3.715093000 | -2.848282000 |
|  | 1 | -1.576735000 | -1.014379000 | -1.041552000 |
|  | 6 | -5.914746000 | 1.357200000  | -1.969369000 |
|  | 6 | -6.069941000 | 0.225293000  | -1.155182000 |
|  | 6 | -4.915984000 | -0.424667000 | -0.741030000 |
|  | 6 | -3.636715000 | 0.027931000  | -1.118850000 |
|  | 6 | -3.496931000 | 1.151921000  | -1.929779000 |
|  | 6 | -4.651007000 | 1.818207000  | -2.354304000 |
|  | 1 | -6.801872000 | 1.885071000  | -2.307027000 |
|  | 1 | -7.055960000 | -0.121483000 | -0.865700000 |
|  | 1 | -2.513387000 | 1.505401000  | -2.223423000 |
|  | 1 | -4.566149000 | 2.696823000  | -2.985674000 |
|  | 6 | -2.657942000 | -0.880112000 | -0.521212000 |
|  | 6 | -3.492913000 | -1.929587000 | 0.248695000  |
|  | 7 | -4.806228000 | -1.572207000 | 0.068503000  |
|  | 8 | -3.087670000 | -2.882307000 | 0.901560000  |
|  | 7 | -1.386939000 | -0.778883000 | -0.623727000 |
|  | 6 | -0.490436000 | -1.753810000 | -0.002607000 |
|  | 1 | -0.971221000 | -2.293713000 | 0.814816000  |
|  | 6 | -0.163267000 | -2.803865000 | -1.079934000 |
|  | 9 | -1.291681000 | -3.313976000 | -1.618181000 |
|  | 9 | 0.558232000  | -2.275153000 | -2.094644000 |
|  | 9 | 0.540543000  | -3.838585000 | -0.581337000 |
|  | 6 | -5.927358000 | -2.298917000 | 0.639611000  |
|  | 1 | -5.523268000 | -3.135569000 | 1.209911000  |

5



|    |              |              |              |
|----|--------------|--------------|--------------|
| 1  | -6.505553000 | -1.649636000 | 1.304637000  |
| 1  | -6.581106000 | -2.678856000 | -0.151812000 |
| 6  | 0.093406000  | 1.929194000  | 3.100400000  |
| 6  | -0.032005000 | 2.475838000  | 1.804231000  |
| 6  | -0.396310000 | 3.828266000  | 1.667977000  |
| 6  | -0.605301000 | 4.594472000  | 2.807019000  |
| 6  | -0.458609000 | 4.037495000  | 4.091611000  |
| 6  | -0.111139000 | 2.700136000  | 4.250132000  |
| 6  | 0.505113000  | 0.231655000  | 1.280078000  |
| 6  | 0.217839000  | 1.479115000  | 0.782429000  |
| 1  | -0.499625000 | 4.259456000  | 0.679080000  |
| 1  | -0.887039000 | 5.638782000  | 2.706264000  |
| 1  | -0.623179000 | 4.655595000  | 4.969558000  |
| 1  | -0.007273000 | 2.264149000  | 5.239297000  |
| 16 | 0.493585000  | 0.220036000  | 3.042838000  |
| 6  | 0.809748000  | -1.025555000 | 0.479488000  |
| 1  | 1.311115000  | -0.680012000 | -0.430093000 |
| 6  | 1.779724000  | -1.953252000 | 1.211585000  |
| 6  | 3.136942000  | -1.933540000 | 0.866002000  |
| 6  | 1.362697000  | -2.804992000 | 2.245897000  |
| 6  | 4.058242000  | -2.740567000 | 1.536192000  |
| 1  | 3.477135000  | -1.280820000 | 0.066672000  |
| 6  | 2.282847000  | -3.611635000 | 2.917927000  |
| 1  | 0.316255000  | -2.850800000 | 2.534338000  |
| 6  | 3.633901000  | -3.582584000 | 2.565783000  |
| 1  | 5.106261000  | -2.711099000 | 1.250883000  |
| 1  | 1.940397000  | -4.265624000 | 3.715065000  |
| 1  | 4.348470000  | -4.212981000 | 3.087612000  |
| 7  | 0.007671000  | 1.728791000  | -0.602095000 |
| 16 | 1.076511000  | 2.568282000  | -1.600237000 |
| 8  | 0.387236000  | 2.599921000  | -2.899091000 |
| 8  | 1.434501000  | 3.814624000  | -0.911776000 |
| 6  | 2.585009000  | 1.622388000  | -1.805972000 |
| 6  | 2.655057000  | 0.649199000  | -2.808974000 |
| 6  | 3.673976000  | 1.870182000  | -0.967355000 |
| 6  | 3.833297000  | -0.075156000 | -2.968045000 |
| 1  | 1.805429000  | 0.470443000  | -3.459245000 |
| 6  | 4.845993000  | 1.135036000  | -1.144211000 |
| 1  | 3.611517000  | 2.635501000  | -0.201698000 |
| 6  | 4.947630000  | 0.157281000  | -2.144806000 |
| 1  | 3.892084000  | -0.828198000 | -3.749381000 |
| 1  | 5.696682000  | 1.329682000  | -0.496785000 |
| 6  | 6.231043000  | -0.608293000 | -2.355123000 |
| 1  | 6.033643000  | -1.651153000 | -2.623620000 |

|  |   |              |              |              |
|--|---|--------------|--------------|--------------|
|  | 1 | 6.815182000  | -0.167952000 | -3.173596000 |
|  | 1 | 6.857647000  | -0.593704000 | -1.458547000 |
|  | 1 | -0.426802000 | 0.929535000  | -1.079813000 |

**Table S4** Number and values ( $\text{cm}^{-1}$ ) of imaginary frequencies for the stationary points involved in the formation of **4** and **5**, computed at the B3LYP/6-31G\* level of theory.

| Name         | No. of I.F. | Value of I.F.   | Name         | No. of I.F. | Value of I.F.   |
|--------------|-------------|-----------------|--------------|-------------|-----------------|
| <b>2</b>     | 0           | –               | <b>TS-3</b>  | 1           | -165.7 <i>i</i> |
| <b>2'</b>    | 0           | –               | <b>INT-3</b> | 0           | –               |
| <b>3a</b>    | 0           | –               | <b>TS-4</b>  | 1           | -277.8 <i>i</i> |
| <b>TS-1</b>  | 1           | -142.6 <i>i</i> | <b>INT-4</b> | 0           | –               |
| <b>INT-1</b> | 0           | –               | <b>TS-5</b>  | 1           | -260.7 <i>i</i> |
| <b>TS-2</b>  | 1           | -26.4 <i>i</i>  | <b>5</b>     | 0           | –               |
| <b>4</b>     | 0           | –               |              |             |                 |

**Table S5** Electronic energies, Gibbs free-energies, entropies (at 298.15 K in CH<sub>3</sub>CN solvent) computed at the B3LYP/6-31G\* level of theory, and electronic energies computed at the m06-PCM/6-311++G\*\* level of theory.

| Species               | $E^{B3}$ in a.u. | $S^{B3}$ in cal/mol K | $G^{B3}$ in a.u. | $E^{M06}$ in a.u. |
|-----------------------|------------------|-----------------------|------------------|-------------------|
| <b>DMAP</b>           | -382.26509       | 92.654                | -382.13692       | -382.0732376      |
| <b>1a</b>             | -1850.09977      | 176.052               | -1849.82352      | -1849.578841      |
| <b>1a-py-com (3a)</b> | -2232.36622      | 219.147               | -2231.93423      | -2231.670483      |
| <b>1b</b>             | -1491.22731      | 171.955               | -1490.92192      | -1490.688549      |
| <b>1b-py-com</b>      | -1873.48235      | 219.425               | -1873.02397      | -1872.767472      |
| <b>1c</b>             | -1527.13164      | 168.76                | -1526.84933      | -1526.606627      |
| <b>1c-py-com</b>      | -1909.38978      | 216.491               | -1908.95391      | -1908.68764       |
| <b>2</b>              | -908.86287       | 124.861               | -908.71734       | -908.6038949      |
| <b>2'</b>             | -1291.12294      | 177.755               | -1290.82861      | -1290.677694      |
| <b>3a</b>             | -2232.36622      | 219.147               | -2231.93423      | -2231.670483      |
| <b>TS-1</b>           | -3523.46657      | 344.579               | -3522.71358      | -3522.346673      |
| <b>INT-1</b>          | -3141.20257      | 282.685               | -3140.5925       | -3140.274001      |
| <b>DMAP</b>           | -382.26509       | 92.654                | -382.13692       | -382.0732376      |
| <b>TS-2</b>           | -2758.92722      | 229.648               | -2758.47         | -2758.179931      |
| <b>4</b>              | -2758.96839      | 232.155               | -2758.50895      | -2758.225425      |
| <b>TS-3</b>           | -3141.20947      | 285.183               | -3140.60406      | -3140.278658      |
| <b>INT-3</b>          | -3141.22607      | 294.744               | -3140.62267      | -3140.293108      |
| <b>TS-4</b>           | -3141.21199      | 292.053               | -3140.61008      | -3140.274937      |
| <b>INT-4</b>          | -3141.22769      | 310.181               | -3140.63439      | -3140.275737      |
| <b>TS-5</b>           | -3141.21867      | 292.056               | -3140.61697      | -3140.273437      |
| <b>5</b>              | -2758.98133      | 243.919               | -2758.52822      | -2758.225802      |

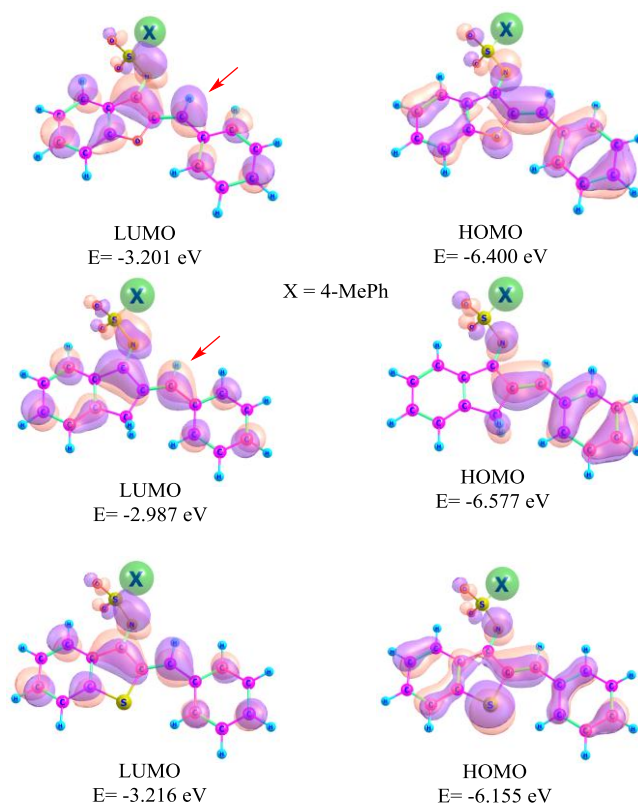

**Figure S1.** Molecular orbitals of **1a**, **1b** and **1c**, computed at the B3LYP/6-311+g\* level of theory.

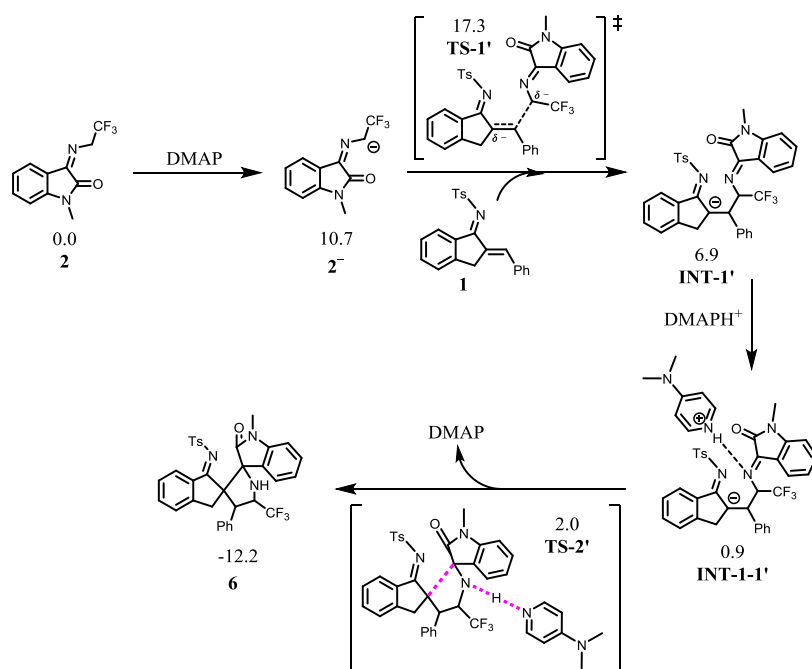

**Figure S2.** Proposed reaction mechanism and free-energy variations (kcal/mol) for the formation of product **6** from the azadiene bearing an indene moiety and **2**.

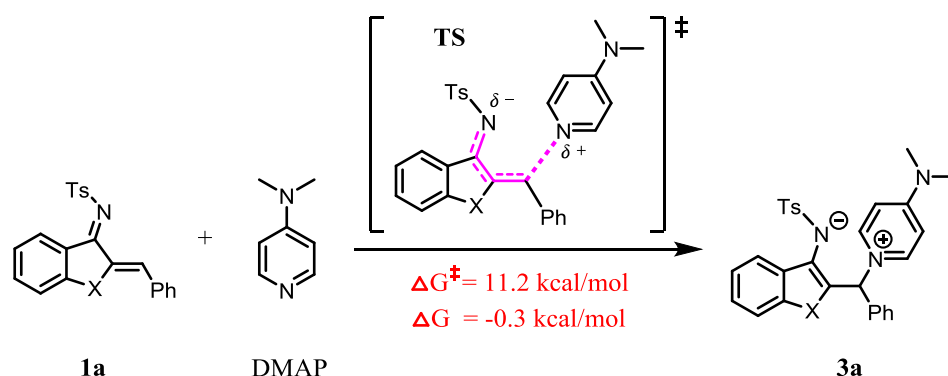

**Figure S3.** Proposed mechanism for the formation of **3a** from **1a** and DMAP.

### Computational Methods

All calculations were finished using the Gaussian 16 computational program<sup>[4]</sup>. Geometrical optimizations were performed by the B3LYP density functional method<sup>[5]</sup> with the 6-31g\* basis set for all elements. The default self-consistent reaction field polarizable continuum model<sup>[6]</sup> was used to consider the implicit solvation effects of CH<sub>3</sub>CN. All of the resultant stationary point geometries were characterized by vibrational analyses, from which zero point energies and Gibbs free-energies were obtained, in addition to confirming whether all of the structures resided at minima or first-order saddle points on the potential energy surfaces. Then, single point calculations were carried out using the m06 method<sup>[7]</sup> and the 6-311++G\*\* basis set in CH<sub>3</sub>CN. Considering the default entropic data obtained from the Gaussian output files are the idea-gas-phase entropies, which would exaggerate the activation entropies for the bimolecular reaction in solution.<sup>[8]</sup> Hence, the default entropies are scaled by a factor of 0.4 in Gibbs free-energy determinations.

## 10. X-ray data collection and structure determinations

Single crystals of **3a**, **4a**, **4c**, **5a**, **5f**, **5l**, **6a**, **6h** was grown by slow diffusion of *n*-hexane into a dichloromethane solution. X-ray single-crystal diffraction data was collected on a Rigaku XtaLAB P200 diffractometer at 200 K with MoK  $\alpha$  radiation ( $\lambda=0.71073 \text{ \AA}$ ) in the  $\omega$  scan mode. The program SAINT was used for integration of the diffraction profiles. The structure was solved using direct methods using the SHELXS program of the SHELXTL package and refined using full matrix least-squares methods with SHELXL (semi empirical absorption corrections were applied using the SADABS program). Other non-hydrogen atoms were located in successive difference Fourier syntheses and refined with anisotropic thermal parameters on *F*<sup>2</sup>. The hydrogen atoms were generated theoretically onto the specific atoms and refined isotopically with fixed thermal factors. Detailed crystallographic data were summarized in Table S3-S10.

**Table S6** Crystal Data and Structure Refinements for (3a)

| Empirical formula                           | C <sub>29</sub> H <sub>27</sub> N <sub>3</sub> O <sub>2</sub> S <sub>2</sub> |
|---------------------------------------------|------------------------------------------------------------------------------|
| Formula weight                              | 513.65                                                                       |
| Temperature/K                               | 293                                                                          |
| Crystal system                              | orthorhombic                                                                 |
| Space group                                 | P2 <sub>1</sub> 2 <sub>1</sub> 2 <sub>1</sub>                                |
| a/Å                                         | 9.1649(3)                                                                    |
| b/Å                                         | 11.9976(4)                                                                   |
| c/Å                                         | 23.8507(9)                                                                   |
| α/°                                         | 90                                                                           |
| β/°                                         | 90                                                                           |
| γ/°                                         | 90                                                                           |
| Volume/Å <sup>3</sup>                       | 2622.55(16)                                                                  |
| Z                                           | 4                                                                            |
| ρ <sub>calc</sub> /cm <sup>3</sup>          | 1.301                                                                        |
| μ/mm <sup>-1</sup>                          | 2.088                                                                        |
| F(000)                                      | 1080.0                                                                       |
| Crystal size/mm <sup>3</sup>                | 0.05 × 0.03 × 0.02                                                           |
| Radiation                                   | CuKα (λ = 1.54184)                                                           |
| 2θ range for data collection/°              | 7.412 to 134.918                                                             |
| Index ranges                                | -10 ≤ h ≤ 10, -13 ≤ k ≤ 14, -28 ≤ l ≤ 28                                     |
| Reflections collected                       | 24974                                                                        |
| Independent reflections                     | 4693 [R <sub>int</sub> = 0.1160, R <sub>sigma</sub> = 0.0868]                |
| Data/restraints/parameters                  | 4693/384/328                                                                 |
| Goodness-of-fit on F <sup>2</sup>           | 1.032                                                                        |
| Final R indexes [I ≥ 2σ (I)]                | R <sub>1</sub> = 0.0669, wR <sub>2</sub> = 0.1558                            |
| Final R indexes [all data]                  | R <sub>1</sub> = 0.1158, wR <sub>2</sub> = 0.1877                            |
| Largest diff. peak/hole / e Å <sup>-3</sup> | 0.23/-0.35                                                                   |
| Flack parameter                             | -0.06(2)                                                                     |

**Table S7** Crystal Data and Structure Refinements for **4a**

| Empirical formula                           | C <sub>33</sub> H <sub>26</sub> F <sub>3</sub> N <sub>3</sub> O <sub>3</sub> S <sub>2</sub> |
|---------------------------------------------|---------------------------------------------------------------------------------------------|
| Formula weight                              | 633.69                                                                                      |
| Temperature/K                               | 296(2)                                                                                      |
| Crystal system                              | monoclinic                                                                                  |
| Space group                                 | C2/c                                                                                        |
| a/Å                                         | 40.85(6)                                                                                    |
| b/Å                                         | 9.365(15)                                                                                   |
| c/Å                                         | 16.24(3)                                                                                    |
| $\alpha$ /°                                 | 90                                                                                          |
| $\beta$ /°                                  | 95.12(2)                                                                                    |
| $\gamma$ /°                                 | 90                                                                                          |
| Volume/Å <sup>3</sup>                       | 6188(18)                                                                                    |
| Z                                           | 8                                                                                           |
| $\rho_{\text{calc}}$ /cm <sup>3</sup>       | 1.360                                                                                       |
| $\mu$ /mm <sup>-1</sup>                     | 0.229                                                                                       |
| F(000)                                      | 2624.0                                                                                      |
| Crystal size/mm <sup>3</sup>                | 0.080 × 0.070 × 0.060                                                                       |
| Radiation                                   | MoK $\alpha$ ( $\lambda$ = 0.71073)                                                         |
| 2 $\Theta$ range for data collection/°      | 5.08 to 49.994                                                                              |
| Index ranges                                | -48 ≤ h ≤ 48, -11 ≤ k ≤ 11, -19 ≤ l ≤ 19                                                    |
| Reflections collected                       | 24102                                                                                       |
| Independent reflections                     | 5404 [R <sub>int</sub> = 0.1713, R <sub>sigma</sub> = 0.1271]                               |
| Data/restraints/parameters                  | 5404/0/399                                                                                  |
| Goodness-of-fit on F <sup>2</sup>           | 0.917                                                                                       |
| Final R indexes [I ≥ 2 $\sigma$ (I)]        | R <sub>1</sub> = 0.0600, wR <sub>2</sub> = 0.1218                                           |
| Final R indexes [all data]                  | R <sub>1</sub> = 0.1566, wR <sub>2</sub> = 0.1672                                           |
| Largest diff. peak/hole / e Å <sup>-3</sup> | 0.40/-0.39                                                                                  |

**Table S8** Crystal Data and Structure Refinements for **4c**

| Empirical formula                           | C <sub>33</sub> H <sub>25</sub> BrF <sub>3</sub> N <sub>3</sub> O <sub>3</sub> S <sub>2</sub> |
|---------------------------------------------|-----------------------------------------------------------------------------------------------|
| Formula weight                              | 712.59                                                                                        |
| Temperature/K                               | 293                                                                                           |
| Crystal system                              | triclinic                                                                                     |
| Space group                                 | P-1                                                                                           |
| a/Å                                         | 9.9808(3)                                                                                     |
| b/Å                                         | 12.3492(4)                                                                                    |
| c/Å                                         | 26.8447(7)                                                                                    |
| α/°                                         | 83.386(2)                                                                                     |
| β/°                                         | 83.439(2)                                                                                     |
| γ/°                                         | 69.273(3)                                                                                     |
| Volume/Å <sup>3</sup>                       | 3064.36(17)                                                                                   |
| Z                                           | 2                                                                                             |
| ρ <sub>calc</sub> /cm <sup>3</sup>          | 1.545                                                                                         |
| μ/mm <sup>-1</sup>                          | 3.609                                                                                         |
| F(000)                                      | 1448.0                                                                                        |
| Crystal size/mm <sup>3</sup>                | 0.05 × 0.04 × 0.04                                                                            |
| Radiation                                   | CuKα (λ = 1.54184)                                                                            |
| 2θ range for data collection/°              | 3.324 to 133.186                                                                              |
| Index ranges                                | -11 ≤ h ≤ 9, -14 ≤ k ≤ 14, -31 ≤ l ≤ 31                                                       |
| Reflections collected                       | 31185                                                                                         |
| Independent reflections                     | 10506 [R <sub>int</sub> = 0.0679, R <sub>sigma</sub> = 0.0782]                                |
| Data/restraints/parameters                  | 10506/0/815                                                                                   |
| Goodness-of-fit on F <sup>2</sup>           | 1.043                                                                                         |
| Final R indexes [I ≥ 2σ (I)]                | R <sub>1</sub> = 0.0581, wR <sub>2</sub> = 0.1554                                             |
| Final R indexes [all data]                  | R <sub>1</sub> = 0.0772, wR <sub>2</sub> = 0.1719                                             |
| Largest diff. peak/hole / e Å <sup>-3</sup> | 0.56/-0.65                                                                                    |

**Table S9** Crystal Data and Structure Refinements for **5a**

| Empirical formula                           | C <sub>33</sub> H <sub>25</sub> F <sub>3</sub> N <sub>3</sub> O <sub>3</sub> S <sub>2</sub> |
|---------------------------------------------|---------------------------------------------------------------------------------------------|
| Formula weight                              | 632.68                                                                                      |
| Temperature/K                               | 293(2)                                                                                      |
| Crystal system                              | triclinic                                                                                   |
| Space group                                 | P-1                                                                                         |
| a/Å                                         | 10.6708(2)                                                                                  |
| b/Å                                         | 11.2012(2)                                                                                  |
| c/Å                                         | 13.5189(2)                                                                                  |
| $\alpha$ /°                                 | 72.0460(10)                                                                                 |
| $\beta$ /°                                  | 81.0890(10)                                                                                 |
| $\gamma$ /°                                 | 79.8810(10)                                                                                 |
| Volume/Å <sup>3</sup>                       | 1504.48(5)                                                                                  |
| Z                                           | 2                                                                                           |
| $\rho_{\text{calc}}$ /cm <sup>3</sup>       | 1.397                                                                                       |
| $\mu$ /mm <sup>-1</sup>                     | 2.107                                                                                       |
| F(000)                                      | 654.0                                                                                       |
| Crystal size/mm <sup>3</sup>                | 0.4 × 0.05 × 0.05                                                                           |
| Radiation                                   | CuK $\alpha$ ( $\lambda$ = 1.54184)                                                         |
| 2 $\Theta$ range for data collection/°      | 6.914 to 133.194                                                                            |
| Index ranges                                | -12 ≤ h ≤ 12, -13 ≤ k ≤ 13, -15 ≤ l ≤ 16                                                    |
| Reflections collected                       | 13816                                                                                       |
| Independent reflections                     | 5162 [R <sub>int</sub> = 0.0305, R <sub>sigma</sub> = 0.0369]                               |
| Data/restraints/parameters                  | 5162/0/399                                                                                  |
| Goodness-of-fit on F <sup>2</sup>           | 1.082                                                                                       |
| Final R indexes [I ≥ 2 $\sigma$ (I)]        | R <sub>1</sub> = 0.0407, wR <sub>2</sub> = 0.1184                                           |
| Final R indexes [all data]                  | R <sub>1</sub> = 0.0444, wR <sub>2</sub> = 0.1220                                           |
| Largest diff. peak/hole / e Å <sup>-3</sup> | 0.66/-0.32                                                                                  |



**Table S10** Crystal Data and Structure Refinements for **5f**

| Empirical formula                           | C <sub>34</sub> H <sub>28</sub> F <sub>3</sub> N <sub>3</sub> O <sub>4</sub> S <sub>2</sub> |
|---------------------------------------------|---------------------------------------------------------------------------------------------|
| Formula weight                              | 663.71                                                                                      |
| Temperature/K                               | 100.00(10)                                                                                  |
| Crystal system                              | triclinic                                                                                   |
| Space group                                 | P-1                                                                                         |
| a/Å                                         | 10.2368(7)                                                                                  |
| b/Å                                         | 11.0840(5)                                                                                  |
| c/Å                                         | 14.3042(6)                                                                                  |
| α/°                                         | 89.713(4)                                                                                   |
| β/°                                         | 80.773(4)                                                                                   |
| γ/°                                         | 69.781(5)                                                                                   |
| Volume/Å <sup>3</sup>                       | 1501.07(15)                                                                                 |
| Z                                           | 2                                                                                           |
| ρ <sub>calc</sub> /cm <sup>3</sup>          | 1.468                                                                                       |
| μ/mm <sup>-1</sup>                          | 2.164                                                                                       |
| F(000)                                      | 688.0                                                                                       |
| Crystal size/mm <sup>3</sup>                | 0.2 × 0.2 × 0.2                                                                             |
| Radiation                                   | CuKα (λ = 1.54184)                                                                          |
| 2θ range for data collection/°              | 6.27 to 134.136                                                                             |
| Index ranges                                | -12 ≤ h ≤ 11, -13 ≤ k ≤ 13, -17 ≤ l ≤ 16                                                    |
| Reflections collected                       | 15530                                                                                       |
| Independent reflections                     | 5364 [R <sub>int</sub> = 0.0435, R <sub>sigma</sub> = 0.0485]                               |
| Data/restraints/parameters                  | 5364/0/418                                                                                  |
| Goodness-of-fit on F <sup>2</sup>           | 1.076                                                                                       |
| Final R indexes [I >= 2σ (I)]               | R <sub>1</sub> = 0.0353, wR <sub>2</sub> = 0.0910                                           |
| Final R indexes [all data]                  | R <sub>1</sub> = 0.0387, wR <sub>2</sub> = 0.0946                                           |
| Largest diff. peak/hole / e Å <sup>-3</sup> | 0.36/-0.32                                                                                  |

**Table S11** Crystal Data and Structure Refinements for **5I**

| Empirical formula                           | C <sub>32</sub> H <sub>24</sub> F <sub>3</sub> N <sub>3</sub> O <sub>3</sub> S <sub>2</sub> |
|---------------------------------------------|---------------------------------------------------------------------------------------------|
| Formula weight                              | 619.66                                                                                      |
| Temperature/K                               | 293(2)                                                                                      |
| Crystal system                              | monoclinic                                                                                  |
| Space group                                 | C2/c                                                                                        |
| a/Å                                         | 21.5032(3)                                                                                  |
| b/Å                                         | 9.51180(10)                                                                                 |
| c/Å                                         | 29.3944(4)                                                                                  |
| α/°                                         | 90                                                                                          |
| β/°                                         | 95.3570(10)                                                                                 |
| γ/°                                         | 90                                                                                          |
| Volume/Å <sup>3</sup>                       | 5985.90(13)                                                                                 |
| Z                                           | 8                                                                                           |
| ρ <sub>calc</sub> /cm <sup>3</sup>          | 1.375                                                                                       |
| μ/mm <sup>-1</sup>                          | 2.106                                                                                       |
| F(000)                                      | 2560.0                                                                                      |
| Crystal size/mm <sup>3</sup>                | 0.100 × 0.080 × 0.040                                                                       |
| Radiation                                   | CuKα (λ = 1.54184)                                                                          |
| 2θ range for data collection/°              | 6.04 to 135.432                                                                             |
| Index ranges                                | -25 ≤ h ≤ 25, -11 ≤ k ≤ 7, -35 ≤ l ≤ 35                                                     |
| Reflections collected                       | 26349                                                                                       |
| Independent reflections                     | 5362 [R <sub>int</sub> = 0.0513, R <sub>sigma</sub> = 0.0283]                               |
| Data/restraints/parameters                  | 5362/0/389                                                                                  |
| Goodness-of-fit on F <sup>2</sup>           | 1.070                                                                                       |
| Final R indexes [I ≥ 2σ (I)]                | R <sub>1</sub> = 0.0546, wR <sub>2</sub> = 0.1617                                           |
| Final R indexes [all data]                  | R <sub>1</sub> = 0.0574, wR <sub>2</sub> = 0.1645                                           |
| Largest diff. peak/hole / e Å <sup>-3</sup> | 0.64/-0.43                                                                                  |

**Table S12** Crystal Data and Structure Refinements for **6a**

| Empirical formula                           | C <sub>33</sub> H <sub>25</sub> F <sub>3</sub> N <sub>3</sub> O <sub>4</sub> S |
|---------------------------------------------|--------------------------------------------------------------------------------|
| Formula weight                              | 616.62                                                                         |
| Temperature/K                               | 293.0                                                                          |
| Crystal system                              | triclinic                                                                      |
| Space group                                 | P-1                                                                            |
| a/Å                                         | 10.5671(5)                                                                     |
| b/Å                                         | 12.1324(4)                                                                     |
| c/Å                                         | 13.2703(5)                                                                     |
| α/°                                         | 89.021(3)                                                                      |
| β/°                                         | 79.487(4)                                                                      |
| γ/°                                         | 89.424(3)                                                                      |
| Volume/Å <sup>3</sup>                       | 1672.46(12)                                                                    |
| Z                                           | 2                                                                              |
| ρ <sub>calc</sub> /cm <sup>3</sup>          | 1.224                                                                          |
| μ/mm <sup>-1</sup>                          | 1.337                                                                          |
| F(000)                                      | 638.0                                                                          |
| Crystal size/mm <sup>3</sup>                | 0.06 × 0.05 × 0.04                                                             |
| Radiation                                   | CuKα (λ = 1.54184)                                                             |
| 2θ range for data collection/°              | 7.288 to 133.2                                                                 |
| Index ranges                                | -12 ≤ h ≤ 12, -9 ≤ k ≤ 13, -15 ≤ l ≤ 15                                        |
| Reflections collected                       | 14693                                                                          |
| Independent reflections                     | 5695 [R <sub>int</sub> = 0.0811, R <sub>sigma</sub> = 0.0966]                  |
| Data/restraints/parameters                  | 5695/301/403                                                                   |
| Goodness-of-fit on F <sup>2</sup>           | 1.143                                                                          |
| Final R indexes [I ≥ 2σ (I)]                | R <sub>1</sub> = 0.1240, wR <sub>2</sub> = 0.3211                              |
| Final R indexes [all data]                  | R <sub>1</sub> = 0.1874, wR <sub>2</sub> = 0.3916                              |
| Largest diff. peak/hole / e Å <sup>-3</sup> | 0.70/-0.87                                                                     |

**Table S13** Crystal Data and Structure Refinements for **6h**

| Empirical formula                           | C <sub>34</sub> H <sub>30</sub> F <sub>3</sub> N <sub>3</sub> O <sub>3</sub> S |
|---------------------------------------------|--------------------------------------------------------------------------------|
| Formula weight                              | 617.67                                                                         |
| Temperature/K                               | 293(2)                                                                         |
| Crystal system                              | triclinic                                                                      |
| Space group                                 | P-1                                                                            |
| a/Å                                         | 10.8546(8)                                                                     |
| b/Å                                         | 17.5790(10)                                                                    |
| c/Å                                         | 18.6479(9)                                                                     |
| $\alpha$ /°                                 | 113.319(5)                                                                     |
| $\beta$ /°                                  | 106.026(6)                                                                     |
| $\gamma$ /°                                 | 92.826(5)                                                                      |
| Volume/Å <sup>3</sup>                       | 3089.5(4)                                                                      |
| Z                                           | 4                                                                              |
| $\rho_{\text{calc}}$ /cm <sup>3</sup>       | 1.328                                                                          |
| $\mu$ /mm <sup>-1</sup>                     | 1.420                                                                          |
| F(000)                                      | 1288.0                                                                         |
| Radiation                                   | CuK $\alpha$ ( $\lambda$ = 1.54184)                                            |
| 2 $\Theta$ range for data collection/°      | 5.452 to 133.202                                                               |
| Index ranges                                | -12 $\leq$ h $\leq$ 12, -20 $\leq$ k $\leq$ 16, -21 $\leq$ l $\leq$ 22         |
| Reflections collected                       | 28409                                                                          |
| Independent reflections                     | 10480 [ $R_{\text{int}}$ = 0.0654, $R_{\text{sigma}}$ = 0.1076]                |
| Data/restraints/parameters                  | 10480/0/806                                                                    |
| Goodness-of-fit on F <sup>2</sup>           | 0.976                                                                          |
| Final R indexes [ $I \geq 2\sigma(I)$ ]     | $R_1$ = 0.0696, $wR_2$ = 0.1757                                                |
| Final R indexes [all data]                  | $R_1$ = 0.1351, $wR_2$ = 0.2178                                                |
| Largest diff. peak/hole / e Å <sup>-3</sup> | 0.31/-0.28                                                                     |

## 11. X-ray crystal structures

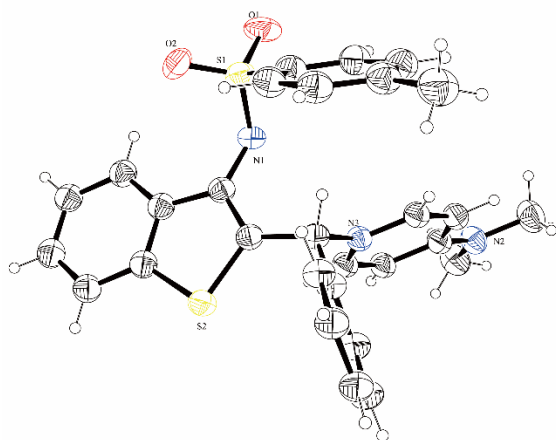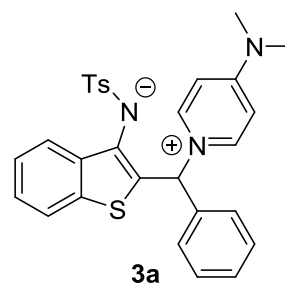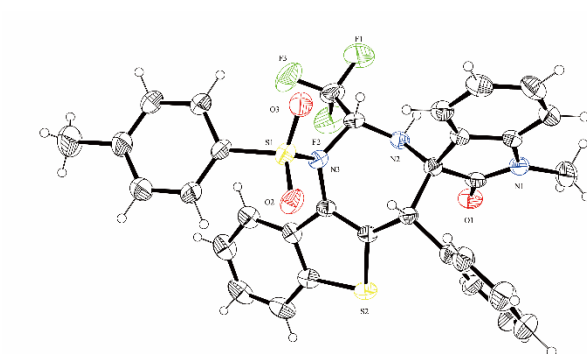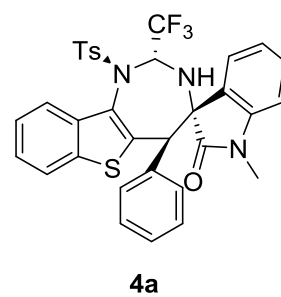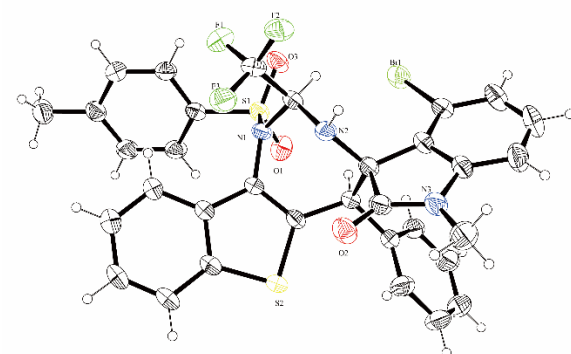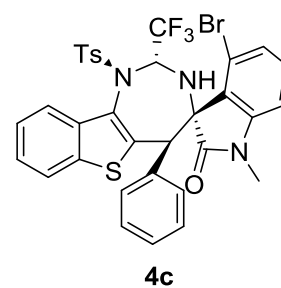

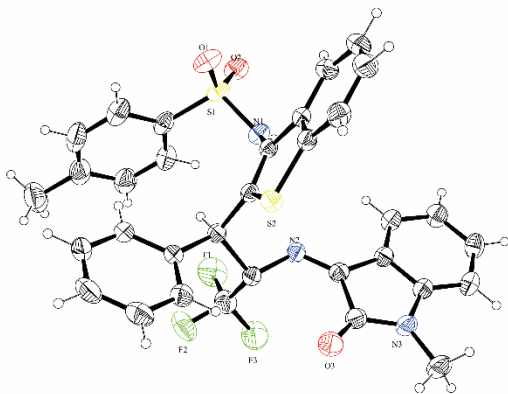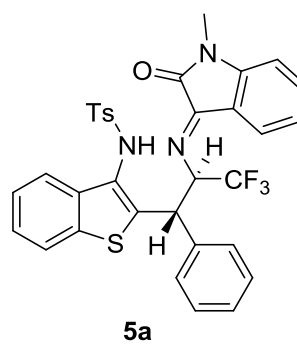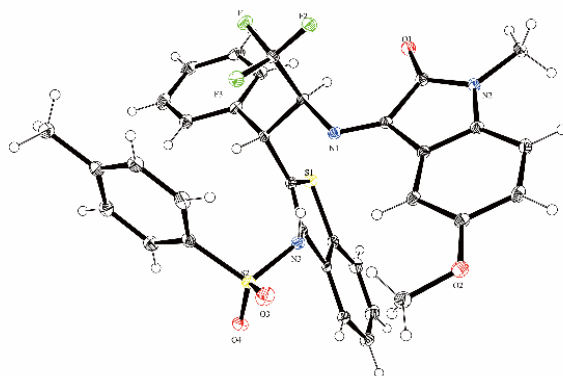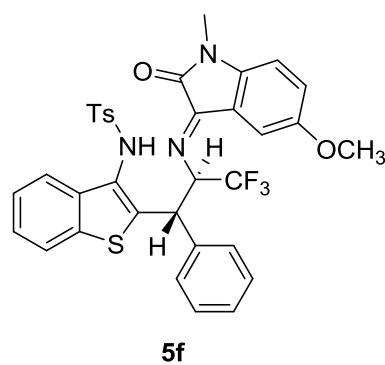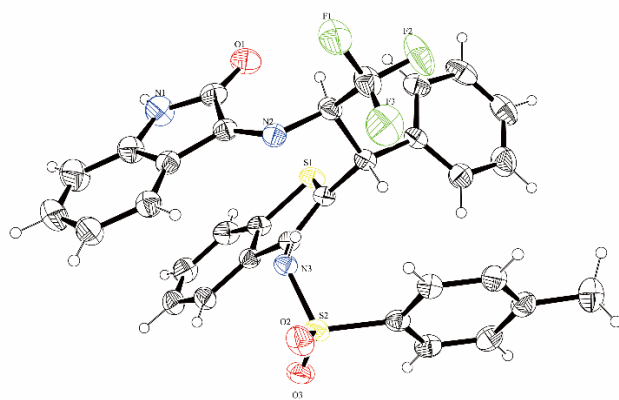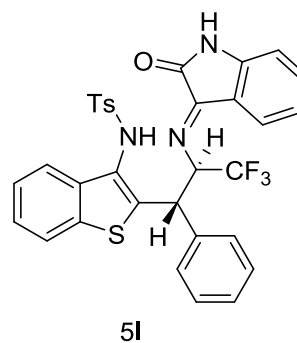

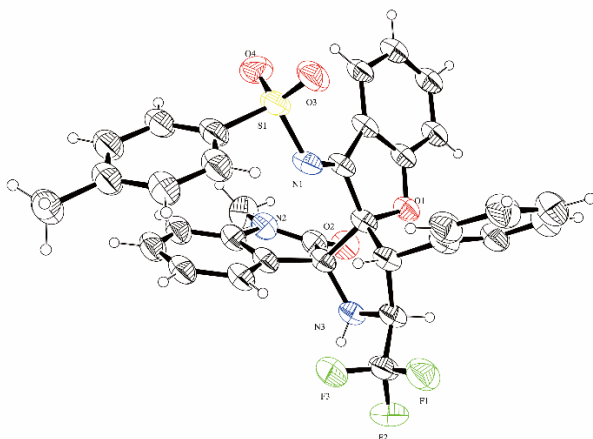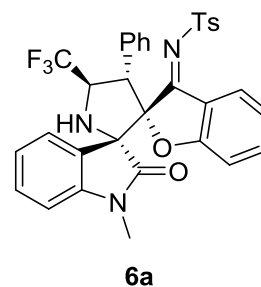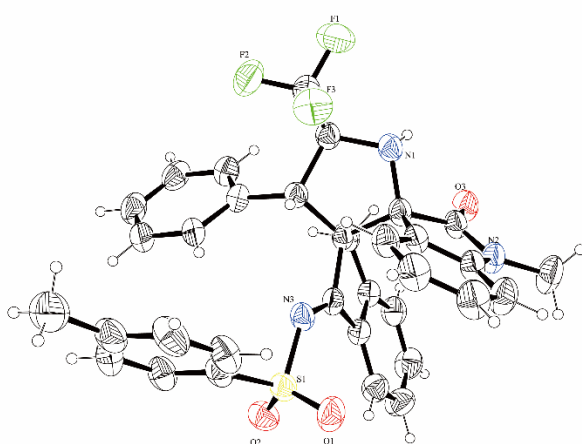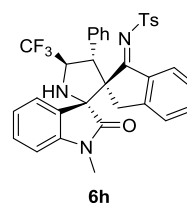

## 12. References

- (1) Yan, R.-J.; Liu, B.-X.; Xiao, B.-X.; Du, W.; Chen, Y.-C. *Org. Lett.* **2020**, *22*, 4240-4244.
- (2) Gu, Z.; Zhou, J.; Jiang, G.-F.; Zhou, Y.-G. *Org. Chem. Front.* **2018**, *5*, 1148-1151.
- (3) (a) Gao, X.-Y.; Yan, R.-J.; Xiao, B.-X.; Du, W.; Albrecht, Ł.; Chen, Y.-C. *Org. Lett.* **2019**, *21*, 9628-9632. (b) Ponce, A.; Alonso, I.; Adrio, J.; Carretero, J. C. *Chem. Eur. J.* **2016**, *22*, 4952-4959. (c) Onyeagusi, C. I.; Shao, X.; Malcolmson, S. J. *Org. Lett.* **2020**, *22*, 1681-1685. (d) Ma, M.; Zhu, Y.; Sun, Q.; Li, X.; Su, J.; Zhao, L.; Zhao, Y.; Qiu, S.; Yan, W.; Wang, K.; Wang, R. *Chem. Commun.* **2015**, *51*, 8789-8792.
- (4) Gaussian 16, Revision C.02, Gaussian, Inc., Wallingford, CT, **2016**.
- (5) (a) Becke, A. D. *J. Chem. Phys.* **1993**, *98*, 5648-5652; (b) Stephens, P. J.; Devlin, F. J.; Chabalowski, C. F. N.; Frisch, M. J. *J. Phys. Chem.* **1994**, *98*, 11623-11627.
- (6) Scalmani, G.; Frisch, M. J. *J. Chem. Phys.* **2010**, *132*, 114110.
- (7) Zhao, Y.; Truhlar, D. G. *J. Chem. Phys.* **2006**, *125*, 194101.
- (8) (a) Huang, F.; Lu, G.; Zhao, L.; Li, H.; Wang, Z.-X. *J. Am. Chem. Soc.* **2010**, *132*, 12388; (b) Plata, R. E.; Singleton, D. A. *J. Am. Chem. Soc.* **2015**, *137*, 3811; (c) J. Kua, J.; Rodriguez, A. A.; Marucci, L. A.; Galloway, M. M.; De Haan, D. O. *J. Phys. Chem. A* **2015**, *119*, 2122.
